# Supplementary material
Source: PubMed Central journal article supplement (PMC5983317)
Supplement: jci-128-97449-s077.pdf [file jci-128-97449-s077.pdf]

Supplementary Table 2: Mutations in single cells

| Chr   | position | ref | alter | gene  | function | Subset  | cell_id  | all_reads | mutant_reads | vaf  |
|-------|----------|-----|-------|-------|----------|---------|----------|-----------|--------------|------|
| chr2  | 26178354 | G   | T     | KIF3C | intron   | Subset1 | M-DCIS-2 | 37        | 28           | 75.6 |
| chr2  | 26178354 | G   | T     | KIF3C | intron   | Subset1 | M-DCIS-5 | 69        | 27           | 39.1 |
| chr1  | 67288225 | A   | C     | WDR78 | intron   | Subset1 | MeC-2    | 164       | 114          | 69.5 |
| chr1  | 67288225 | A   | C     | WDR78 | intron   | Subset1 | MeP-2    | 23        | 4            | 17.3 |
| chr1  | 67288225 | A   | C     | WDR78 | intron   | Subset1 | MeC-10   | 15        | 14           | 93.3 |
| chr1  | 67288225 | A   | C     | WDR78 | intron   | Subset1 | MeC-3    | 6         | 2            | 33.3 |
| chr1  | 67288225 | A   | C     | WDR78 | intron   | Subset1 | MeC-4    | 87        | 41           | 47.1 |
| chr1  | 67288225 | A   | C     | WDR78 | intron   | Subset1 | MeC-5    | 42        | 5            | 11.9 |
| chr1  | 67288225 | A   | C     | WDR78 | intron   | Subset1 | MeP-1    | 67        | 2            | 2.9  |
| chr1  | 67288225 | A   | C     | WDR78 | intron   | Subset1 | MeP-18   | 3         | 2            | 66.6 |
| chr1  | 67288225 | A   | C     | WDR78 | intron   | Subset1 | MeP-4    | 45        | 36           | 80   |
| chr1  | 67288225 | A   | C     | WDR78 | intron   | Subset1 | MeP-6    | 448       | 417          | 93   |
| chr1  | 67288225 | A   | C     | WDR78 | intron   | Subset1 | DCIS-1   | 36        | 3            | 8.3  |
| chr1  | 67288225 | A   | C     | WDR78 | intron   | Subset1 | DCIS-2   | 12        | 2            | 16.6 |
| chr1  | 67288225 | A   | C     | WDR78 | intron   | Subset1 | DCIS-3   | 25        | 9            | 36   |
| chr1  | 67288225 | A   | C     | WDR78 | intron   | Subset1 | DCIS-6   | 32        | 17           | 53.1 |
| chr1  | 67288225 | A   | C     | WDR78 | intron   | Subset1 | DCIS-8   | 22        | 2            | 9    |
| chr1  | 67288225 | A   | C     | WDR78 | intron   | Subset1 | InvF-10  | 12        | 8            | 66.6 |
| chr1  | 67288225 | A   | C     | WDR78 | intron   | Subset1 | InvF-1   | 6         | 5            | 83.3 |
| chr1  | 67288225 | A   | C     | WDR78 | intron   | Subset1 | InvF-11  | 51        | 4            | 7.8  |
| chr1  | 67288225 | A   | C     | WDR78 | intron   | Subset1 | InvF-12  | 84        | 7            | 8.3  |
| chr1  | 67288225 | A   | C     | WDR78 | intron   | Subset1 | InvF-9   | 48        | 19           | 39.5 |
| chr1  | 67288225 | A   | C     | WDR78 | intron   | Subset1 | MeD-2    | 52        | 27           | 51.9 |
| chr1  | 67288225 | A   | C     | WDR78 | intron   | Subset1 | MeD-7    | 66        | 5            | 7.5  |
| chr1  | 67288225 | A   | C     | WDR78 | intron   | Subset1 | MeD-8    | 32        | 5            | 15.6 |
| chr1  | 67288225 | A   | C     | WDR78 | intron   | Subset1 | MeD-9    | 56        | 27           | 48.2 |
| chr1  | 67288225 | A   | C     | WDR78 | intron   | Subset1 | M-DCIS-2 | 34        | 7            | 20.5 |
| chr1  | 67288225 | A   | C     | WDR78 | intron   | Subset1 | S1-11    | 219       | 54           | 24.6 |
| chr1  | 67288225 | A   | C     | WDR78 | intron   | Subset1 | S1-1     | 15        | 15           | 100  |
| chr1  | 67288225 | A   | C     | WDR78 | intron   | Subset1 | S1-2     | 60        | 23           | 38.3 |
| chr1  | 67288225 | A   | C     | WDR78 | intron   | Subset1 | S1-6     | 26        | 10           | 38.4 |
| chr1  | 67288225 | A   | C     | WDR78 | intron   | Subset1 | S1-9     | 6         | 2            | 33.3 |
| chr18 | 23847672 | T   | A     | TAF4B | intron   | Subset1 | MeC-2    | 51        | 22           | 43.1 |
| chr18 | 23847672 | T   | A     | TAF4B | intron   | Subset1 | MeP-2    | 17        | 7            | 41.1 |
| chr18 | 23847672 | T   | A     | TAF4B | intron   | Subset1 | MeC-3    | 186       | 2            | 1    |
| chr18 | 23847672 | T   | A     | TAF4B | intron   | Subset1 | MeC-4    | 74        | 29           | 39.1 |
| chr18 | 23847672 | T   | A     | TAF4B | intron   | Subset1 | MeC-8    | 2         | 2            | 100  |
| chr18 | 23847672 | T   | A     | TAF4B | intron   | Subset1 | MeP-1    | 12        | 2            | 16.6 |
| chr18 | 23847672 | T   | A     | TAF4B | intron   | Subset1 | MeP-16   | 3         | 2            | 66.6 |
| chr18 | 23847672 | T   | A     | TAF4B | intron   | Subset1 | MeP-18   | 2         | 2            | 100  |
| chr18 | 23847672 | T   | A     | TAF4B | intron   | Subset1 | MeP-4    | 30        | 23           | 76.6 |
| chr18 | 23847672 | T   | A     | TAF4B | intron   | Subset1 | MeP-6    | 43        | 34           | 79   |
| chr18 | 23847672 | T   | A     | TAF4B | intron   | Subset1 | DCIS-3   | 33        | 6            | 18.1 |
| chr18 | 23847672 | T   | A     | TAF4B | intron   | Subset1 | DCIS-6   | 11        | 3            | 27.2 |
| chr18 | 23847672 | T   | A     | TAF4B | intron   | Subset1 | InvF-1   | 15        | 7            | 46.6 |
| chr18 | 23847672 | T   | A     | TAF4B | intron   | Subset1 | InvF-12  | 13        | 7            | 53.8 |
| chr18 | 23847672 | T   | A     | TAF4B | intron   | Subset1 | InvF-9   | 33        | 3            | 9    |
| chr18 | 23847672 | T   | A     | TAF4B | intron   | Subset1 | MeD-2    | 139       | 11           | 7.9  |
| chr18 | 23847672 | T   | A     | TAF4B | intron   | Subset1 | MeD-7    | 261       | 12           | 4.5  |
| chr18 | 23847672 | T   | A     | TAF4B | intron   | Subset1 | MeD-8    | 153       | 39           | 25.4 |
| chr18 | 23847672 | T   | A     | TAF4B | intron   | Subset1 | MeD-9    | 214       | 87           | 40.6 |
| chr18 | 23847672 | T   | A     | TAF4B | intron   | Subset1 | M-DCIS-2 | 145       | 2            | 1.3  |
| chr18 | 23847672 | T   | A     | TAF4B | intron   | Subset1 | S1-11    | 190       | 57           | 30   |

|       |          |   |   |        |        |         |         |     |     |      |
|-------|----------|---|---|--------|--------|---------|---------|-----|-----|------|
| chr18 | 23847672 | T | A | TAF4B  | intron | Subset1 | S3-13   | 271 | 150 | 55.3 |
| chr18 | 23847672 | T | A | TAF4B  | intron | Subset1 | S3-7    | 77  | 49  | 63.6 |
| chr18 | 23847672 | T | A | TAF4B  | intron | Subset1 | S1-1    | 2   | 2   | 100  |
| chr18 | 23847672 | T | A | TAF4B  | intron | Subset1 | S1-2    | 44  | 32  | 72.7 |
| chr18 | 23847672 | T | A | TAF4B  | intron | Subset1 | S2-10   | 33  | 6   | 18.1 |
| chr18 | 23847672 | T | A | TAF4B  | intron | Subset1 | S2-13   | 35  | 32  | 91.4 |
| chr17 | 66343089 | A | G | ARSG   | intron | Subset2 | BN-3    | 19  | 6   | 31.5 |
| chr17 | 66343089 | A | G | ARSG   | intron | Subset2 | BN-4    | 12  | 2   | 16.6 |
| chr17 | 66343089 | A | G | ARSG   | intron | Subset2 | BN-5    | 15  | 4   | 26.6 |
| chr19 | 56952444 | T | A | ZNF667 | utr-3  | Subset1 | MeC-2   | 228 | 115 | 50.4 |
| chr19 | 56952444 | T | A | ZNF667 | utr-3  | Subset1 | MeP-2   | 30  | 4   | 13.3 |
| chr19 | 56952444 | T | A | ZNF667 | utr-3  | Subset1 | MeC-1   | 110 | 105 | 95.4 |
| chr19 | 56952444 | T | A | ZNF667 | utr-3  | Subset1 | MeC-11  | 43  | 37  | 86   |
| chr19 | 56952444 | T | A | ZNF667 | utr-3  | Subset1 | MeC-20  | 3   | 2   | 66.6 |
| chr19 | 56952444 | T | A | ZNF667 | utr-3  | Subset1 | MeC-4   | 75  | 37  | 49.3 |
| chr19 | 56952444 | T | A | ZNF667 | utr-3  | Subset1 | MeP-18  | 4   | 4   | 100  |
| chr19 | 56952444 | T | A | ZNF667 | utr-3  | Subset1 | MeP-4   | 129 | 10  | 7.7  |
| chr19 | 56952444 | T | A | ZNF667 | utr-3  | Subset1 | MeP-6   | 90  | 10  | 11.1 |
| chr19 | 56952444 | T | A | ZNF667 | utr-3  | Subset1 | DCIS-1  | 91  | 5   | 5.4  |
| chr19 | 56952444 | T | A | ZNF667 | utr-3  | Subset1 | DCIS-3  | 23  | 2   | 8.6  |
| chr19 | 56952444 | T | A | ZNF667 | utr-3  | Subset1 | InvF-1  | 30  | 9   | 30   |
| chr19 | 56952444 | T | A | ZNF667 | utr-3  | Subset1 | InvF-13 | 5   | 2   | 40   |
| chr19 | 56952444 | T | A | ZNF667 | utr-3  | Subset1 | MeD-2   | 108 | 33  | 30.5 |
| chr19 | 56952444 | T | A | ZNF667 | utr-3  | Subset1 | MeD-4   | 96  | 5   | 5.2  |
| chr19 | 56952444 | T | A | ZNF667 | utr-3  | Subset1 | MeD-7   | 93  | 17  | 18.2 |
| chr19 | 56952444 | T | A | ZNF667 | utr-3  | Subset1 | MeD-8   | 37  | 9   | 24.3 |
| chr19 | 56952444 | T | A | ZNF667 | utr-3  | Subset1 | MeD-9   | 70  | 59  | 84.2 |
| chr19 | 56952444 | T | A | ZNF667 | utr-3  | Subset1 | S1-11   | 131 | 61  | 46.5 |
| chr19 | 56952444 | T | A | ZNF667 | utr-3  | Subset1 | S3-13   | 41  | 4   | 9.7  |
| chr19 | 56952444 | T | A | ZNF667 | utr-3  | Subset1 | S3-7    | 22  | 9   | 40.9 |
| chr19 | 56952444 | T | A | ZNF667 | utr-3  | Subset1 | S1-2    | 58  | 16  | 27.5 |
| chr19 | 56952444 | T | A | ZNF667 | utr-3  | Subset1 | S2-14   | 31  | 2   | 6.4  |
| chr19 | 56952444 | T | A | ZNF667 | utr-3  | Subset1 | S2-7    | 21  | 19  | 90.4 |
| chr11 | 55839004 | G | C | .      | .      | Subset2 | BN-1    | 10  | 4   | 40   |
| chr11 | 55839004 | G | C | .      | .      | Subset2 | BN-12   | 15  | 6   | 40   |
| chr11 | 55839004 | G | C | .      | .      | Subset2 | BN-15   | 3   | 2   | 66.6 |
| chr11 | 55839004 | G | C | .      | .      | Subset2 | BNM-1   | 27  | 5   | 18.5 |
| chr11 | 55839004 | G | C | .      | .      | Subset2 | BNM-2   | 90  | 7   | 7.7  |
| chr11 | 55839004 | G | C | .      | .      | Subset2 | BNM-3   | 41  | 10  | 24.3 |
| chr21 | 34945784 | G | T | SON    | intron | Subset1 | MeC-2   | 177 | 20  | 11.2 |
| chr21 | 34945784 | G | T | SON    | intron | Subset1 | MeP-2   | 75  | 35  | 46.6 |
| chr21 | 34945784 | G | T | SON    | intron | Subset1 | MeC-1   | 8   | 2   | 25   |
| chr21 | 34945784 | G | T | SON    | intron | Subset1 | MeC-3   | 238 | 168 | 70.5 |
| chr21 | 34945784 | G | T | SON    | intron | Subset1 | MeC-4   | 104 | 19  | 18.2 |
| chr21 | 34945784 | G | T | SON    | intron | Subset1 | MeC-5   | 26  | 9   | 34.6 |
| chr21 | 34945784 | G | T | SON    | intron | Subset1 | MeC-8   | 42  | 5   | 11.9 |
| chr21 | 34945784 | G | T | SON    | intron | Subset1 | MeP-4   | 158 | 110 | 69.6 |
| chr21 | 34945784 | G | T | SON    | intron | Subset1 | MeP-6   | 30  | 10  | 33.3 |
| chr21 | 34945784 | G | T | SON    | intron | Subset1 | DCIS-1  | 34  | 4   | 11.7 |
| chr21 | 34945784 | G | T | SON    | intron | Subset1 | DCIS-3  | 41  | 2   | 4.8  |
| chr21 | 34945784 | G | T | SON    | intron | Subset1 | DCIS-8  | 39  | 6   | 15.3 |
| chr21 | 34945784 | G | T | SON    | intron | Subset1 | InvF-11 | 66  | 5   | 7.5  |
| chr21 | 34945784 | G | T | SON    | intron | Subset1 | InvF-9  | 118 | 21  | 17.7 |
| chr21 | 34945784 | G | T | SON    | intron | Subset1 | MeD-2   | 168 | 11  | 6.5  |
| chr21 | 34945784 | G | T | SON    | intron | Subset1 | MeD-7   | 175 | 60  | 34.2 |

|       |           |   |   |        |              |         |          |     |     |      |
|-------|-----------|---|---|--------|--------------|---------|----------|-----|-----|------|
| chr21 | 34945784  | G | T | SON    | intron       | Subset1 | MeD-8    | 181 | 45  | 24.8 |
| chr21 | 34945784  | G | T | SON    | intron       | Subset1 | MeD-9    | 174 | 71  | 40.8 |
| chr21 | 34945784  | G | T | SON    | intron       | Subset1 | M-DCIS-2 | 480 | 11  | 2.2  |
| chr21 | 34945784  | G | T | SON    | intron       | Subset1 | M-DCIS-5 | 90  | 3   | 3.3  |
| chr21 | 34945784  | G | T | SON    | intron       | Subset1 | S1-11    | 375 | 128 | 34.1 |
| chr21 | 34945784  | G | T | SON    | intron       | Subset1 | S1-1     | 161 | 2   | 1.2  |
| chr21 | 34945784  | G | T | SON    | intron       | Subset1 | S1-2     | 77  | 27  | 35   |
| chr21 | 34945784  | G | T | SON    | intron       | Subset1 | S1-6     | 39  | 20  | 51.2 |
| chr21 | 34945784  | G | T | SON    | intron       | Subset1 | S1-9     | 71  | 58  | 81.6 |
| chr1  | 7151574   | C | A | CAMTA1 | intron       | Subset1 | MeC-2    | 143 | 15  | 10.4 |
| chr1  | 7151574   | C | A | CAMTA1 | intron       | Subset1 | MeP-2    | 67  | 3   | 4.4  |
| chr1  | 7151574   | C | A | CAMTA1 | intron       | Subset1 | MeC-3    | 489 | 146 | 29.8 |
| chr1  | 7151574   | C | A | CAMTA1 | intron       | Subset1 | MeC-4    | 233 | 12  | 5.1  |
| chr1  | 7151574   | C | A | CAMTA1 | intron       | Subset1 | MeP-1    | 41  | 4   | 9.7  |
| chr1  | 7151574   | C | A | CAMTA1 | intron       | Subset1 | MeP-4    | 67  | 51  | 76.1 |
| chr1  | 7151574   | C | A | CAMTA1 | intron       | Subset1 | MeP-6    | 71  | 46  | 64.7 |
| chr1  | 7151574   | C | A | CAMTA1 | intron       | Subset1 | DCIS-1   | 154 | 14  | 9    |
| chr1  | 7151574   | C | A | CAMTA1 | intron       | Subset1 | DCIS-2   | 57  | 6   | 10.5 |
| chr1  | 7151574   | C | A | CAMTA1 | intron       | Subset1 | DCIS-6   | 49  | 25  | 51   |
| chr1  | 7151574   | C | A | CAMTA1 | intron       | Subset1 | MeD-2    | 39  | 8   | 20.5 |
| chr1  | 7151574   | C | A | CAMTA1 | intron       | Subset1 | MeD-7    | 117 | 15  | 12.8 |
| chr1  | 7151574   | C | A | CAMTA1 | intron       | Subset1 | MeD-8    | 33  | 6   | 18.1 |
| chr1  | 7151574   | C | A | CAMTA1 | intron       | Subset1 | MeD-9    | 45  | 18  | 40   |
| chr1  | 7151574   | C | A | CAMTA1 | intron       | Subset1 | M-DCIS-2 | 76  | 11  | 14.4 |
| chr1  | 7151574   | C | A | CAMTA1 | intron       | Subset1 | S1-11    | 66  | 3   | 4.5  |
| chr1  | 7151574   | C | A | CAMTA1 | intron       | Subset1 | S3-13    | 65  | 40  | 61.5 |
| chr1  | 7151574   | C | A | CAMTA1 | intron       | Subset1 | S1-12    | 121 | 3   | 2.4  |
| chr1  | 7151574   | C | A | CAMTA1 | intron       | Subset1 | S2-14    | 116 | 8   | 6.8  |
| chr1  | 7151574   | C | A | CAMTA1 | intron       | Subset1 | S2-7     | 338 | 337 | 99.7 |
| chr8  | 131792822 | G | A | ADCY8  | coding-synon | Subset2 | BN-5     | 398 | 36  | 9    |
| chr8  | 131792822 | G | A | ADCY8  | coding-synon | Subset2 | BN-11    | 17  | 2   | 11.7 |
| chr8  | 131792822 | G | A | ADCY8  | coding-synon | Subset2 | BN-15    | 62  | 59  | 95.1 |
| chr8  | 131792822 | G | A | ADCY8  | coding-synon | Subset2 | BNM-1    | 13  | 4   | 30.7 |
| chr8  | 131792822 | G | A | ADCY8  | coding-synon | Subset2 | BNM-2    | 41  | 6   | 14.6 |
| chr8  | 131792822 | G | A | ADCY8  | coding-synon | Subset2 | BNM-3    | 25  | 8   | 32   |
| chr1  | 176012469 | A | T | RFWD2  | intron       | Subset1 | MeC-2    | 195 | 118 | 60.5 |
| chr1  | 176012469 | A | T | RFWD2  | intron       | Subset1 | MeP-2    | 443 | 308 | 69.5 |
| chr1  | 176012469 | A | T | RFWD2  | intron       | Subset1 | MeC-1    | 9   | 8   | 88.8 |
| chr1  | 176012469 | A | T | RFWD2  | intron       | Subset1 | MeC-10   | 79  | 76  | 96.2 |
| chr1  | 176012469 | A | T | RFWD2  | intron       | Subset1 | MeC-11   | 6   | 3   | 50   |
| chr1  | 176012469 | A | T | RFWD2  | intron       | Subset1 | MeC-20   | 3   | 3   | 100  |
| chr1  | 176012469 | A | T | RFWD2  | intron       | Subset1 | MeC-3    | 307 | 304 | 99   |
| chr1  | 176012469 | A | T | RFWD2  | intron       | Subset1 | MeC-4    | 130 | 122 | 93.8 |
| chr1  | 176012469 | A | T | RFWD2  | intron       | Subset1 | MeC-5    | 123 | 120 | 97.5 |
| chr1  | 176012469 | A | T | RFWD2  | intron       | Subset1 | MeC-8    | 12  | 9   | 75   |
| chr1  | 176012469 | A | T | RFWD2  | intron       | Subset1 | MeP-1    | 31  | 4   | 12.9 |
| chr1  | 176012469 | A | T | RFWD2  | intron       | Subset1 | MeP-12   | 24  | 6   | 25   |
| chr1  | 176012469 | A | T | RFWD2  | intron       | Subset1 | MeP-4    | 169 | 153 | 90.5 |
| chr1  | 176012469 | A | T | RFWD2  | intron       | Subset1 | MeP-5    | 103 | 2   | 1.9  |
| chr1  | 176012469 | A | T | RFWD2  | intron       | Subset1 | MeP-6    | 93  | 81  | 87   |
| chr1  | 176012469 | A | T | RFWD2  | intron       | Subset1 | DCIS-1   | 53  | 29  | 54.7 |
| chr1  | 176012469 | A | T | RFWD2  | intron       | Subset1 | DCIS-2   | 25  | 12  | 48   |
| chr1  | 176012469 | A | T | RFWD2  | intron       | Subset1 | DCIS-3   | 31  | 14  | 45.1 |
| chr1  | 176012469 | A | T | RFWD2  | intron       | Subset1 | DCIS-5   | 8   | 8   | 100  |
| chr1  | 176012469 | A | T | RFWD2  | intron       | Subset1 | DCIS-6   | 32  | 11  | 34.3 |

|       |           |   |   |         |          |         |          |      |      |      |
|-------|-----------|---|---|---------|----------|---------|----------|------|------|------|
| chr1  | 176012469 | A | T | RFWD2   | intron   | Subset1 | DCIS-8   | 38   | 16   | 42.1 |
| chr1  | 176012469 | A | T | RFWD2   | intron   | Subset1 | InvF-10  | 4    | 4    | 100  |
| chr1  | 176012469 | A | T | RFWD2   | intron   | Subset1 | InvF-4   | 9    | 7    | 77.7 |
| chr1  | 176012469 | A | T | RFWD2   | intron   | Subset1 | InvF-1   | 47   | 42   | 89.3 |
| chr1  | 176012469 | A | T | RFWD2   | intron   | Subset1 | InvF-11  | 46   | 4    | 8.6  |
| chr1  | 176012469 | A | T | RFWD2   | intron   | Subset1 | InvF-12  | 5    | 4    | 80   |
| chr1  | 176012469 | A | T | RFWD2   | intron   | Subset1 | InvF-13  | 5    | 4    | 80   |
| chr1  | 176012469 | A | T | RFWD2   | intron   | Subset1 | InvF-9   | 503  | 207  | 41.1 |
| chr1  | 176012469 | A | T | RFWD2   | intron   | Subset1 | MeD-2    | 152  | 90   | 59.2 |
| chr1  | 176012469 | A | T | RFWD2   | intron   | Subset1 | MeD-4    | 99   | 16   | 16.1 |
| chr1  | 176012469 | A | T | RFWD2   | intron   | Subset1 | MeD-7    | 153  | 60   | 39.2 |
| chr1  | 176012469 | A | T | RFWD2   | intron   | Subset1 | MeD-8    | 238  | 162  | 68   |
| chr1  | 176012469 | A | T | RFWD2   | intron   | Subset1 | MeD-9    | 290  | 163  | 56.2 |
| chr1  | 176012469 | A | T | RFWD2   | intron   | Subset1 | M-DCIS-8 | 49   | 4    | 8.1  |
| chr1  | 176012469 | A | T | RFWD2   | intron   | Subset1 | M-DCIS-2 | 35   | 7    | 20   |
| chr1  | 176012469 | A | T | RFWD2   | intron   | Subset1 | S1-11    | 698  | 522  | 74.7 |
| chr1  | 176012469 | A | T | RFWD2   | intron   | Subset1 | S3-2     | 2    | 2    | 100  |
| chr1  | 176012469 | A | T | RFWD2   | intron   | Subset1 | S3-13    | 23   | 12   | 52.1 |
| chr1  | 176012469 | A | T | RFWD2   | intron   | Subset1 | S3-7     | 19   | 4    | 21   |
| chr1  | 176012469 | A | T | RFWD2   | intron   | Subset1 | S1-12    | 64   | 4    | 6.2  |
| chr1  | 176012469 | A | T | RFWD2   | intron   | Subset1 | S1-2     | 48   | 8    | 16.6 |
| chr1  | 176012469 | A | T | RFWD2   | intron   | Subset1 | S1-6     | 58   | 25   | 43.1 |
| chr1  | 176012469 | A | T | RFWD2   | intron   | Subset1 | S1-9     | 96   | 15   | 15.6 |
| chr1  | 176012469 | A | T | RFWD2   | intron   | Subset1 | S2-10    | 36   | 2    | 5.5  |
| chr1  | 176012469 | A | T | RFWD2   | intron   | Subset1 | S2-14    | 35   | 2    | 5.7  |
| chr1  | 176012469 | A | T | RFWD2   | intron   | Subset1 | S2-4     | 85   | 5    | 5.8  |
| chr1  | 176012469 | A | T | RFWD2   | intron   | Subset1 | S2-5     | 68   | 14   | 20.5 |
| chr1  | 176012469 | A | T | RFWD2   | intron   | Subset1 | S2-7     | 35   | 9    | 25.7 |
| chr16 | 4519161   | G | A | NMRAL1  | intron   | Subset2 | BN-1     | 26   | 3    | 11.5 |
| chr16 | 4519161   | G | A | NMRAL1  | intron   | Subset2 | BN-13    | 8    | 2    | 25   |
| chr16 | 4519161   | G | A | NMRAL1  | intron   | Subset2 | BN-9     | 19   | 7    | 36.8 |
| chr16 | 4519161   | G | A | NMRAL1  | intron   | Subset2 | BN-10    | 5368 | 5167 | 96.2 |
| chr16 | 4519161   | G | A | NMRAL1  | intron   | Subset2 | BN-3     | 29   | 2    | 6.8  |
| chr16 | 4519161   | G | A | NMRAL1  | intron   | Subset2 | BN-15    | 25   | 8    | 32   |
| chr16 | 4519161   | G | A | NMRAL1  | intron   | Subset2 | BNM-2    | 20   | 2    | 10   |
| chr16 | 4519161   | G | A | NMRAL1  | intron   | Subset2 | BNM-3    | 9    | 2    | 22.2 |
| chr4  | 144442625 | C | T | SMARCA5 | missense | Subset1 | MeC-2    | 86   | 3    | 3.4  |
| chr4  | 144442625 | C | T | SMARCA5 | missense | Subset1 | MeP-2    | 418  | 39   | 9.3  |
| chr4  | 144442625 | C | T | SMARCA5 | missense | Subset1 | MeC-11   | 10   | 10   | 100  |
| chr4  | 144442625 | C | T | SMARCA5 | missense | Subset1 | MeC-3    | 273  | 3    | 1    |
| chr4  | 144442625 | C | T | SMARCA5 | missense | Subset1 | MeC-4    | 81   | 8    | 9.8  |
| chr4  | 144442625 | C | T | SMARCA5 | missense | Subset1 | MeC-8    | 50   | 37   | 74   |
| chr4  | 144442625 | C | T | SMARCA5 | missense | Subset1 | MeP-18   | 3    | 2    | 66.6 |
| chr4  | 144442625 | C | T | SMARCA5 | missense | Subset1 | MeP-4    | 64   | 6    | 9.3  |
| chr4  | 144442625 | C | T | SMARCA5 | missense | Subset1 | MeP-6    | 12   | 5    | 41.6 |
| chr4  | 144442625 | C | T | SMARCA5 | missense | Subset1 | DCIS-3   | 26   | 9    | 34.6 |
| chr4  | 144442625 | C | T | SMARCA5 | missense | Subset1 | DCIS-6   | 12   | 5    | 41.6 |
| chr4  | 144442625 | C | T | SMARCA5 | missense | Subset1 | InvF-1   | 8    | 4    | 50   |
| chr4  | 144442625 | C | T | SMARCA5 | missense | Subset1 | InvF-11  | 11   | 2    | 18.1 |
| chr4  | 144442625 | C | T | SMARCA5 | missense | Subset1 | InvF-13  | 4    | 2    | 50   |
| chr4  | 144442625 | C | T | SMARCA5 | missense | Subset1 | MeD-2    | 38   | 5    | 13.1 |
| chr4  | 144442625 | C | T | SMARCA5 | missense | Subset1 | MeD-4    | 29   | 2    | 6.8  |
| chr4  | 144442625 | C | T | SMARCA5 | missense | Subset1 | MeD-7    | 45   | 3    | 6.6  |
| chr4  | 144442625 | C | T | SMARCA5 | missense | Subset1 | MeD-8    | 9    | 5    | 55.5 |
| chr4  | 144442625 | C | T | SMARCA5 | missense | Subset1 | MeD-9    | 34   | 4    | 11.7 |

|       |           |   |   |         |          |         |          |     |     |      |
|-------|-----------|---|---|---------|----------|---------|----------|-----|-----|------|
| chr4  | 144442625 | C | T | SMARCA5 | missense | Subset1 | S1-11    | 202 | 77  | 38.1 |
| chr4  | 144442625 | C | T | SMARCA5 | missense | Subset1 | S3-13    | 14  | 7   | 50   |
| chr4  | 144442625 | C | T | SMARCA5 | missense | Subset1 | S3-7     | 19  | 9   | 47.3 |
| chr4  | 144442625 | C | T | SMARCA5 | missense | Subset1 | S1-2     | 68  | 4   | 5.8  |
| chr4  | 144442625 | C | T | SMARCA5 | missense | Subset1 | S2-4     | 31  | 2   | 6.4  |
| chr4  | 17910679  | C | T | LCORL   | intron   | Subset1 | MeC-2    | 52  | 26  | 50   |
| chr4  | 17910679  | C | T | LCORL   | intron   | Subset1 | MeP-2    | 12  | 8   | 66.6 |
| chr4  | 17910679  | C | T | LCORL   | intron   | Subset1 | MeC-3    | 4   | 2   | 50   |
| chr4  | 17910679  | C | T | LCORL   | intron   | Subset1 | MeC-4    | 21  | 3   | 14.2 |
| chr4  | 17910679  | C | T | LCORL   | intron   | Subset1 | MeP-4    | 31  | 2   | 6.4  |
| chr4  | 17910679  | C | T | LCORL   | intron   | Subset1 | MeP-6    | 15  | 5   | 33.3 |
| chr4  | 17910679  | C | T | LCORL   | intron   | Subset1 | DCIS-2   | 3   | 3   | 100  |
| chr4  | 17910679  | C | T | LCORL   | intron   | Subset1 | DCIS-8   | 19  | 2   | 10.5 |
| chr4  | 17910679  | C | T | LCORL   | intron   | Subset1 | InvF-1   | 21  | 10  | 47.6 |
| chr4  | 17910679  | C | T | LCORL   | intron   | Subset1 | InvF-13  | 188 | 187 | 99.4 |
| chr4  | 17910679  | C | T | LCORL   | intron   | Subset1 | InvF-9   | 40  | 21  | 52.5 |
| chr4  | 17910679  | C | T | LCORL   | intron   | Subset1 | MeD-2    | 13  | 4   | 30.7 |
| chr4  | 17910679  | C | T | LCORL   | intron   | Subset1 | MeD-7    | 55  | 4   | 7.2  |
| chr4  | 17910679  | C | T | LCORL   | intron   | Subset1 | MeD-9    | 26  | 12  | 46.1 |
| chr4  | 17910679  | C | T | LCORL   | intron   | Subset1 | M-DCIS-8 | 114 | 5   | 4.3  |
| chr4  | 17910679  | C | T | LCORL   | intron   | Subset1 | S1-11    | 39  | 9   | 23   |
| chr17 | 7671351   | G | A | DNAH2   | missense | Subset1 | MeC-2    | 112 | 68  | 60.7 |
| chr17 | 7671351   | G | A | DNAH2   | missense | Subset1 | MeP-2    | 390 | 253 | 64.8 |
| chr17 | 7671351   | G | A | DNAH2   | missense | Subset1 | MeC-10   | 5   | 5   | 100  |
| chr17 | 7671351   | G | A | DNAH2   | missense | Subset1 | MeC-11   | 148 | 18  | 12.1 |
| chr17 | 7671351   | G | A | DNAH2   | missense | Subset1 | MeC-3    | 87  | 19  | 21.8 |
| chr17 | 7671351   | G | A | DNAH2   | missense | Subset1 | MeC-4    | 66  | 15  | 22.7 |
| chr17 | 7671351   | G | A | DNAH2   | missense | Subset1 | MeC-8    | 18  | 15  | 83.3 |
| chr17 | 7671351   | G | A | DNAH2   | missense | Subset1 | MeP-1    | 30  | 7   | 23.3 |
| chr17 | 7671351   | G | A | DNAH2   | missense | Subset1 | MeP-18   | 19  | 19  | 100  |
| chr17 | 7671351   | G | A | DNAH2   | missense | Subset1 | MeP-4    | 134 | 111 | 82.8 |
| chr17 | 7671351   | G | A | DNAH2   | missense | Subset1 | MeP-5    | 346 | 108 | 31.2 |
| chr17 | 7671351   | G | A | DNAH2   | missense | Subset1 | MeP-6    | 34  | 14  | 41.1 |
| chr17 | 7671351   | G | A | DNAH2   | missense | Subset1 | DCIS-1   | 86  | 5   | 5.8  |
| chr17 | 7671351   | G | A | DNAH2   | missense | Subset1 | DCIS-2   | 66  | 31  | 46.9 |
| chr17 | 7671351   | G | A | DNAH2   | missense | Subset1 | DCIS-3   | 252 | 73  | 28.9 |
| chr17 | 7671351   | G | A | DNAH2   | missense | Subset1 | DCIS-6   | 61  | 13  | 21.3 |
| chr17 | 7671351   | G | A | DNAH2   | missense | Subset1 | DCIS-8   | 41  | 4   | 9.7  |
| chr17 | 7671351   | G | A | DNAH2   | missense | Subset1 | InvF-10  | 25  | 10  | 40   |
| chr17 | 7671351   | G | A | DNAH2   | missense | Subset1 | InvF-1   | 46  | 12  | 26   |
| chr17 | 7671351   | G | A | DNAH2   | missense | Subset1 | InvF-13  | 3   | 3   | 100  |
| chr17 | 7671351   | G | A | DNAH2   | missense | Subset1 | InvF-9   | 197 | 14  | 7.1  |
| chr17 | 7671351   | G | A | DNAH2   | missense | Subset1 | MeD-2    | 81  | 47  | 58   |
| chr17 | 7671351   | G | A | DNAH2   | missense | Subset1 | MeD-7    | 343 | 17  | 4.9  |
| chr17 | 7671351   | G | A | DNAH2   | missense | Subset1 | MeD-8    | 59  | 41  | 69.4 |
| chr17 | 7671351   | G | A | DNAH2   | missense | Subset1 | MeD-9    | 23  | 23  | 100  |
| chr17 | 7671351   | G | A | DNAH2   | missense | Subset1 | M-DCIS-2 | 318 | 9   | 2.8  |
| chr17 | 7671351   | G | A | DNAH2   | missense | Subset1 | M-DCIS-5 | 41  | 6   | 14.6 |
| chr17 | 7671351   | G | A | DNAH2   | missense | Subset1 | S1-11    | 69  | 51  | 73.9 |
| chr17 | 7671351   | G | A | DNAH2   | missense | Subset1 | S3-2     | 19  | 6   | 31.5 |
| chr17 | 7671351   | G | A | DNAH2   | missense | Subset1 | S3-13    | 191 | 20  | 10.4 |
| chr17 | 7671351   | G | A | DNAH2   | missense | Subset1 | S3-3     | 161 | 78  | 48.4 |
| chr17 | 7671351   | G | A | DNAH2   | missense | Subset1 | S3-7     | 15  | 11  | 73.3 |
| chr17 | 7671351   | G | A | DNAH2   | missense | Subset1 | S1-1     | 577 | 571 | 98.9 |
| chr17 | 7671351   | G | A | DNAH2   | missense | Subset1 | S1-6     | 29  | 4   | 13.7 |

|       |          |   |   |         |          |         |          |     |     |      |
|-------|----------|---|---|---------|----------|---------|----------|-----|-----|------|
| chr17 | 7671351  | G | A | DNAH2   | missense | Subset1 | S1-9     | 45  | 37  | 82.2 |
| chr17 | 7671351  | G | A | DNAH2   | missense | Subset1 | S2-14    | 96  | 12  | 12.5 |
| chr21 | 43716529 | G | A | ABCG1   | utr-3    | Subset1 | MeC-2    | 147 | 21  | 14.2 |
| chr21 | 43716529 | G | A | ABCG1   | utr-3    | Subset1 | MeP-2    | 26  | 3   | 11.5 |
| chr21 | 43716529 | G | A | ABCG1   | utr-3    | Subset1 | MeC-3    | 151 | 48  | 31.7 |
| chr21 | 43716529 | G | A | ABCG1   | utr-3    | Subset1 | MeC-4    | 292 | 157 | 53.7 |
| chr21 | 43716529 | G | A | ABCG1   | utr-3    | Subset1 | MeC-5    | 20  | 8   | 40   |
| chr21 | 43716529 | G | A | ABCG1   | utr-3    | Subset1 | MeP-1    | 23  | 5   | 21.7 |
| chr21 | 43716529 | G | A | ABCG1   | utr-3    | Subset1 | MeP-18   | 28  | 28  | 100  |
| chr21 | 43716529 | G | A | ABCG1   | utr-3    | Subset1 | MeP-4    | 83  | 47  | 56.6 |
| chr21 | 43716529 | G | A | ABCG1   | utr-3    | Subset1 | MeP-6    | 104 | 64  | 61.5 |
| chr21 | 43716529 | G | A | ABCG1   | utr-3    | Subset1 | DCIS-1   | 56  | 2   | 3.5  |
| chr21 | 43716529 | G | A | ABCG1   | utr-3    | Subset1 | DCIS-3   | 68  | 2   | 2.9  |
| chr21 | 43716529 | G | A | ABCG1   | utr-3    | Subset1 | DCIS-6   | 83  | 8   | 9.6  |
| chr21 | 43716529 | G | A | ABCG1   | utr-3    | Subset1 | DCIS-8   | 39  | 3   | 7.6  |
| chr21 | 43716529 | G | A | ABCG1   | utr-3    | Subset1 | InvF-10  | 9   | 3   | 33.3 |
| chr21 | 43716529 | G | A | ABCG1   | utr-3    | Subset1 | InvF-4   | 23  | 2   | 8.6  |
| chr21 | 43716529 | G | A | ABCG1   | utr-3    | Subset1 | InvF-5   | 19  | 19  | 100  |
| chr21 | 43716529 | G | A | ABCG1   | utr-3    | Subset1 | InvF-1   | 71  | 18  | 25.3 |
| chr21 | 43716529 | G | A | ABCG1   | utr-3    | Subset1 | InvF-11  | 64  | 3   | 4.6  |
| chr21 | 43716529 | G | A | ABCG1   | utr-3    | Subset1 | InvF-12  | 11  | 4   | 36.3 |
| chr21 | 43716529 | G | A | ABCG1   | utr-3    | Subset1 | InvF-13  | 58  | 3   | 5.1  |
| chr21 | 43716529 | G | A | ABCG1   | utr-3    | Subset1 | InvF-9   | 259 | 186 | 71.8 |
| chr21 | 43716529 | G | A | ABCG1   | utr-3    | Subset1 | MeD-7    | 71  | 2   | 2.8  |
| chr21 | 43716529 | G | A | ABCG1   | utr-3    | Subset1 | MeD-8    | 21  | 7   | 33.3 |
| chr21 | 43716529 | G | A | ABCG1   | utr-3    | Subset1 | MeD-9    | 36  | 23  | 63.8 |
| chr21 | 43716529 | G | A | ABCG1   | utr-3    | Subset1 | M-DCIS-2 | 86  | 13  | 15.1 |
| chr21 | 43716529 | G | A | ABCG1   | utr-3    | Subset1 | M-DCIS-5 | 21  | 3   | 14.2 |
| chr21 | 43716529 | G | A | ABCG1   | utr-3    | Subset1 | S1-11    | 62  | 26  | 41.9 |
| chr21 | 43716529 | G | A | ABCG1   | utr-3    | Subset1 | S3-2     | 58  | 37  | 63.7 |
| chr21 | 43716529 | G | A | ABCG1   | utr-3    | Subset1 | S3-1     | 103 | 2   | 1.9  |
| chr21 | 43716529 | G | A | ABCG1   | utr-3    | Subset1 | S3-7     | 183 | 22  | 12   |
| chr21 | 43716529 | G | A | ABCG1   | utr-3    | Subset1 | S1-6     | 59  | 12  | 20.3 |
| chr21 | 43716529 | G | A | ABCG1   | utr-3    | Subset1 | S1-9     | 50  | 39  | 78   |
| chr21 | 43716529 | G | A | ABCG1   | utr-3    | Subset1 | S2-8     | 116 | 3   | 2.5  |
| chr20 | 34242158 | T | A | RBM12   | missense | Subset2 | BN-10    | 14  | 6   | 42.8 |
| chr20 | 34242158 | T | A | RBM12   | missense | Subset2 | BN-3     | 63  | 28  | 44.4 |
| chr20 | 34242158 | T | A | RBM12   | missense | Subset2 | BN-4     | 118 | 47  | 39.8 |
| chr20 | 34242158 | T | A | RBM12   | missense | Subset2 | BN-5     | 152 | 42  | 27.6 |
| chr20 | 34242158 | T | A | RBM12   | missense | Subset2 | BNM-2    | 76  | 6   | 7.8  |
| chr20 | 34242158 | T | A | RBM12   | missense | Subset2 | BNM-3    | 52  | 6   | 11.5 |
| chr20 | 58519261 | A | T | FAM217B | missense | Subset1 | MeC-2    | 20  | 7   | 35   |
| chr20 | 58519261 | A | T | FAM217B | missense | Subset1 | MeP-2    | 146 | 2   | 1.3  |
| chr20 | 58519261 | A | T | FAM217B | missense | Subset1 | MeC-3    | 16  | 10  | 62.5 |
| chr20 | 58519261 | A | T | FAM217B | missense | Subset1 | MeC-4    | 37  | 6   | 16.2 |
| chr20 | 58519261 | A | T | FAM217B | missense | Subset1 | MeP-1    | 30  | 11  | 36.6 |
| chr20 | 58519261 | A | T | FAM217B | missense | Subset1 | MeP-4    | 23  | 8   | 34.7 |
| chr20 | 58519261 | A | T | FAM217B | missense | Subset1 | MeP-6    | 27  | 16  | 59.2 |
| chr20 | 58519261 | A | T | FAM217B | missense | Subset1 | DCIS-1   | 12  | 3   | 25   |
| chr20 | 58519261 | A | T | FAM217B | missense | Subset1 | DCIS-2   | 13  | 4   | 30.7 |
| chr20 | 58519261 | A | T | FAM217B | missense | Subset1 | DCIS-3   | 28  | 8   | 28.5 |
| chr20 | 58519261 | A | T | FAM217B | missense | Subset1 | InvF-10  | 17  | 5   | 29.4 |
| chr20 | 58519261 | A | T | FAM217B | missense | Subset1 | InvF-4   | 2   | 2   | 100  |
| chr20 | 58519261 | A | T | FAM217B | missense | Subset1 | InvF-1   | 49  | 13  | 26.5 |
| chr20 | 58519261 | A | T | FAM217B | missense | Subset1 | InvF-13  | 14  | 14  | 100  |

|       |           |   |   |         |              |         |          |     |     |      |
|-------|-----------|---|---|---------|--------------|---------|----------|-----|-----|------|
| chr20 | 58519261  | A | T | FAM217B | missense     | Subset1 | InvF-9   | 15  | 5   | 33.3 |
| chr20 | 58519261  | A | T | FAM217B | missense     | Subset1 | MeD-2    | 57  | 2   | 3.5  |
| chr20 | 58519261  | A | T | FAM217B | missense     | Subset1 | MeD-7    | 46  | 8   | 17.3 |
| chr20 | 58519261  | A | T | FAM217B | missense     | Subset1 | MeD-9    | 48  | 16  | 33.3 |
| chr20 | 58519261  | A | T | FAM217B | missense     | Subset1 | M-DCIS-5 | 36  | 2   | 5.5  |
| chr20 | 58519261  | A | T | FAM217B | missense     | Subset1 | S1-11    | 342 | 86  | 25.1 |
| chr20 | 58519261  | A | T | FAM217B | missense     | Subset1 | S3-2     | 9   | 4   | 44.4 |
| chr20 | 58519261  | A | T | FAM217B | missense     | Subset1 | S3-1     | 77  | 72  | 93.5 |
| chr20 | 58519261  | A | T | FAM217B | missense     | Subset1 | S3-3     | 60  | 9   | 15   |
| chr20 | 58519261  | A | T | FAM217B | missense     | Subset1 | S3-7     | 18  | 4   | 22.2 |
| chr20 | 58519261  | A | T | FAM217B | missense     | Subset1 | S2-4     | 39  | 2   | 5.1  |
| chr9  | 124064411 | C | T | GSN     | coding-synon | Subset2 | BN-3     | 7   | 4   | 57.1 |
| chr9  | 124064411 | C | T | GSN     | coding-synon | Subset2 | BN-11    | 122 | 67  | 54.9 |
| chr9  | 124064411 | C | T | GSN     | coding-synon | Subset2 | BNM-2    | 35  | 4   | 11.4 |
| chr6  | 170626416 | T | C | FAM120B | intron       | Subset2 | BN-1     | 341 | 256 | 75   |
| chr6  | 170626416 | T | C | FAM120B | intron       | Subset2 | BN-12    | 249 | 44  | 17.6 |
| chr6  | 170626416 | T | C | FAM120B | intron       | Subset2 | BN-4     | 58  | 5   | 8.6  |
| chr6  | 170626416 | T | C | FAM120B | intron       | Subset2 | BN-5     | 54  | 2   | 3.7  |
| chr6  | 170626416 | T | C | FAM120B | intron       | Subset2 | BN-15    | 7   | 2   | 28.5 |
| chr6  | 170626416 | T | C | FAM120B | intron       | Subset2 | BNM-2    | 23  | 6   | 26   |
| chr22 | 29837765  | G | A | RFPL1   | missense     | Subset2 | BN-12    | 451 | 118 | 26.1 |
| chr22 | 29837765  | G | A | RFPL1   | missense     | Subset2 | BN-10    | 210 | 69  | 32.8 |
| chr22 | 29837765  | G | A | RFPL1   | missense     | Subset2 | BN-3     | 91  | 32  | 35.1 |
| chr22 | 29837765  | G | A | RFPL1   | missense     | Subset2 | BN-4     | 106 | 6   | 5.6  |
| chr22 | 29837765  | G | A | RFPL1   | missense     | Subset2 | BN-5     | 217 | 66  | 30.4 |
| chr22 | 29837765  | G | A | RFPL1   | missense     | Subset2 | BNM-2    | 48  | 3   | 6.2  |
| chr22 | 29837765  | G | A | RFPL1   | missense     | Subset2 | BNM-3    | 99  | 8   | 8    |
| chr15 | 51529096  | G | A | CYP19A1 | nonsense     | Subset3 | MeC-4    | 270 | 44  | 16.2 |
| chr15 | 51529096  | G | A | CYP19A1 | nonsense     | Subset3 | S1-9     | 23  | 7   | 30.4 |
| chr15 | 51529096  | G | A | CYP19A1 | nonsense     | Subset3 | S2-2     | 38  | 35  | 92.1 |
| chr3  | 111769579 | A | G | TMPRSS7 | coding-synon | Subset1 | MeC-2    | 340 | 16  | 4.7  |
| chr3  | 111769579 | A | G | TMPRSS7 | coding-synon | Subset1 | MeP-2    | 273 | 6   | 2.1  |
| chr3  | 111769579 | A | G | TMPRSS7 | coding-synon | Subset1 | MeC-1    | 3   | 2   | 66.6 |
| chr3  | 111769579 | A | G | TMPRSS7 | coding-synon | Subset1 | MeC-10   | 34  | 16  | 47   |
| chr3  | 111769579 | A | G | TMPRSS7 | coding-synon | Subset1 | MeC-11   | 2   | 2   | 100  |
| chr3  | 111769579 | A | G | TMPRSS7 | coding-synon | Subset1 | MeC-20   | 14  | 14  | 100  |
| chr3  | 111769579 | A | G | TMPRSS7 | coding-synon | Subset1 | MeC-3    | 66  | 4   | 6    |
| chr3  | 111769579 | A | G | TMPRSS7 | coding-synon | Subset1 | MeC-4    | 47  | 19  | 40.4 |
| chr3  | 111769579 | A | G | TMPRSS7 | coding-synon | Subset1 | MeP-1    | 23  | 4   | 17.3 |
| chr3  | 111769579 | A | G | TMPRSS7 | coding-synon | Subset1 | MeP-4    | 58  | 38  | 65.5 |
| chr3  | 111769579 | A | G | TMPRSS7 | coding-synon | Subset1 | MeP-6    | 160 | 65  | 40.6 |
| chr3  | 111769579 | A | G | TMPRSS7 | coding-synon | Subset1 | DCIS-1   | 53  | 5   | 9.4  |
| chr3  | 111769579 | A | G | TMPRSS7 | coding-synon | Subset1 | DCIS-3   | 33  | 4   | 12.1 |
| chr3  | 111769579 | A | G | TMPRSS7 | coding-synon | Subset1 | DCIS-8   | 68  | 6   | 8.8  |
| chr3  | 111769579 | A | G | TMPRSS7 | coding-synon | Subset1 | InvF-10  | 19  | 3   | 15.7 |
| chr3  | 111769579 | A | G | TMPRSS7 | coding-synon | Subset1 | InvF-4   | 57  | 2   | 3.5  |
| chr3  | 111769579 | A | G | TMPRSS7 | coding-synon | Subset1 | InvF-11  | 102 | 22  | 21.5 |
| chr3  | 111769579 | A | G | TMPRSS7 | coding-synon | Subset1 | InvF-12  | 157 | 8   | 5    |
| chr3  | 111769579 | A | G | TMPRSS7 | coding-synon | Subset1 | InvF-13  | 5   | 5   | 100  |
| chr3  | 111769579 | A | G | TMPRSS7 | coding-synon | Subset1 | InvF-9   | 50  | 5   | 10   |
| chr3  | 111769579 | A | G | TMPRSS7 | coding-synon | Subset1 | MeD-2    | 127 | 28  | 22   |
| chr3  | 111769579 | A | G | TMPRSS7 | coding-synon | Subset1 | MeD-4    | 100 | 4   | 4    |
| chr3  | 111769579 | A | G | TMPRSS7 | coding-synon | Subset1 | MeD-7    | 85  | 6   | 7    |
| chr3  | 111769579 | A | G | TMPRSS7 | coding-synon | Subset1 | MeD-8    | 50  | 31  | 62   |
| chr3  | 111769579 | A | G | TMPRSS7 | coding-synon | Subset1 | MeD-9    | 92  | 38  | 41.3 |

|       |           |   |   |         |              |         |          |      |     |      |
|-------|-----------|---|---|---------|--------------|---------|----------|------|-----|------|
| chr3  | 111769579 | A | G | TMPRSS7 | coding-synon | Subset1 | M-DCIS-2 | 145  | 3   | 2    |
| chr3  | 111769579 | A | G | TMPRSS7 | coding-synon | Subset1 | M-DCIS-3 | 430  | 401 | 93.2 |
| chr3  | 111769579 | A | G | TMPRSS7 | coding-synon | Subset1 | S1-11    | 362  | 96  | 26.5 |
| chr3  | 111769579 | A | G | TMPRSS7 | coding-synon | Subset1 | S3-2     | 10   | 3   | 30   |
| chr3  | 111769579 | A | G | TMPRSS7 | coding-synon | Subset1 | S3-1     | 19   | 4   | 21   |
| chr3  | 111769579 | A | G | TMPRSS7 | coding-synon | Subset1 | S3-7     | 104  | 66  | 63.4 |
| chr3  | 111769579 | A | G | TMPRSS7 | coding-synon | Subset1 | S3-9     | 118  | 2   | 1.6  |
| chr3  | 111769579 | A | G | TMPRSS7 | coding-synon | Subset1 | S1-1     | 127  | 108 | 85   |
| chr3  | 111769579 | A | G | TMPRSS7 | coding-synon | Subset1 | S1-9     | 11   | 9   | 81.8 |
| chr3  | 111769579 | A | G | TMPRSS7 | coding-synon | Subset1 | S2-10    | 108  | 18  | 16.6 |
| chr3  | 111769579 | A | G | TMPRSS7 | coding-synon | Subset1 | S2-13    | 8    | 7   | 87.5 |
| chr15 | 42049973  | T | A | MGA     | intron       | Subset3 | DCIS-1   | 110  | 2   | 1.8  |
| chr15 | 42049973  | T | A | MGA     | intron       | Subset3 | MeD-4    | 127  | 3   | 2.3  |
| chr15 | 42049973  | T | A | MGA     | intron       | Subset3 | S3-13    | 72   | 9   | 12.5 |
| chr15 | 42049973  | T | A | MGA     | intron       | Subset3 | S1-12    | 190  | 14  | 7.3  |
| chr15 | 42049973  | T | A | MGA     | intron       | Subset3 | BN-3     | 233  | 14  | 6    |
| chr12 | 53825187  | G | C | AMHR2   | missense     | Subset3 | MeP-12   | 185  | 3   | 1.6  |
| chr12 | 53825187  | G | C | AMHR2   | missense     | Subset3 | DCIS-1   | 252  | 13  | 5.1  |
| chr12 | 53825187  | G | C | AMHR2   | missense     | Subset3 | DCIS-8   | 61   | 5   | 8.1  |
| chr12 | 53825187  | G | C | AMHR2   | missense     | Subset3 | Ly-10    | 67   | 5   | 7.4  |
| chr12 | 53825187  | G | C | AMHR2   | missense     | Subset3 | MeD-2    | 50   | 6   | 12   |
| chr12 | 53825187  | G | C | AMHR2   | missense     | Subset3 | MeD-4    | 116  | 8   | 6.8  |
| chr12 | 53825187  | G | C | AMHR2   | missense     | Subset3 | S1-11    | 185  | 11  | 5.9  |
| chr12 | 53825187  | G | C | AMHR2   | missense     | Subset3 | S3-3     | 74   | 3   | 4    |
| chr12 | 53825187  | G | C | AMHR2   | missense     | Subset3 | S2-13    | 3    | 2   | 66.6 |
| chr8  | 110457059 | G | A | PKHD1L1 | missense     | Subset2 | BN-11    | 11   | 5   | 45.4 |
| chr8  | 110457059 | G | A | PKHD1L1 | missense     | Subset2 | BN-15    | 23   | 3   | 13   |
| chr8  | 110457059 | G | A | PKHD1L1 | missense     | Subset2 | BNM-1    | 86   | 9   | 10.4 |
| chr8  | 110457059 | G | A | PKHD1L1 | missense     | Subset2 | BNM-2    | 191  | 31  | 16.2 |
| chr19 | 24309537  | A | G | ZNF254  | coding-synon | Subset2 | BN-12    | 220  | 126 | 57.2 |
| chr19 | 24309537  | A | G | ZNF254  | coding-synon | Subset2 | BN-11    | 64   | 33  | 51.5 |
| chr19 | 24309537  | A | G | ZNF254  | coding-synon | Subset2 | BN-15    | 44   | 9   | 20.4 |
| chr19 | 24309537  | A | G | ZNF254  | coding-synon | Subset2 | BNM-1    | 58   | 7   | 12   |
| chr19 | 24309537  | A | G | ZNF254  | coding-synon | Subset2 | BNM-2    | 79   | 6   | 7.5  |
| chr19 | 24309537  | A | G | ZNF254  | coding-synon | Subset2 | BNM-3    | 74   | 3   | 4    |
| chr16 | 15869796  | A | G | MYH11   | intron       | Subset1 | MeC-2    | 153  | 47  | 30.7 |
| chr16 | 15869796  | A | G | MYH11   | intron       | Subset1 | MeP-2    | 198  | 82  | 41.4 |
| chr16 | 15869796  | A | G | MYH11   | intron       | Subset1 | MeC-10   | 3    | 2   | 66.6 |
| chr16 | 15869796  | A | G | MYH11   | intron       | Subset1 | MeC-11   | 62   | 2   | 3.2  |
| chr16 | 15869796  | A | G | MYH11   | intron       | Subset1 | MeC-3    | 262  | 166 | 63.3 |
| chr16 | 15869796  | A | G | MYH11   | intron       | Subset1 | MeC-4    | 285  | 61  | 21.4 |
| chr16 | 15869796  | A | G | MYH11   | intron       | Subset1 | MeC-5    | 15   | 9   | 60   |
| chr16 | 15869796  | A | G | MYH11   | intron       | Subset1 | MeC-8    | 58   | 19  | 32.7 |
| chr16 | 15869796  | A | G | MYH11   | intron       | Subset1 | MeP-4    | 160  | 64  | 40   |
| chr16 | 15869796  | A | G | MYH11   | intron       | Subset1 | MeP-6    | 227  | 75  | 33   |
| chr16 | 15869796  | A | G | MYH11   | intron       | Subset1 | DCIS-1   | 89   | 10  | 11.2 |
| chr16 | 15869796  | A | G | MYH11   | intron       | Subset1 | DCIS-2   | 22   | 3   | 13.6 |
| chr16 | 15869796  | A | G | MYH11   | intron       | Subset1 | DCIS-3   | 259  | 184 | 71   |
| chr16 | 15869796  | A | G | MYH11   | intron       | Subset1 | DCIS-6   | 562  | 547 | 97.3 |
| chr16 | 15869796  | A | G | MYH11   | intron       | Subset1 | DCIS-8   | 64   | 4   | 6.2  |
| chr16 | 15869796  | A | G | MYH11   | intron       | Subset1 | InvF-10  | 702  | 429 | 61.1 |
| chr16 | 15869796  | A | G | MYH11   | intron       | Subset1 | InvF-4   | 1121 | 933 | 83.2 |
| chr16 | 15869796  | A | G | MYH11   | intron       | Subset1 | InvF-5   | 685  | 379 | 55.3 |
| chr16 | 15869796  | A | G | MYH11   | intron       | Subset1 | InvF-1   | 77   | 22  | 28.5 |
| chr16 | 15869796  | A | G | MYH11   | intron       | Subset1 | InvF-9   | 399  | 131 | 32.8 |



|       |          |   |   |       |          |         |          |      |      |      |
|-------|----------|---|---|-------|----------|---------|----------|------|------|------|
| chr16 | 15869796 | A | G | MYH11 | intron   | Subset1 | MeD-2    | 68   | 15   | 22   |
| chr16 | 15869796 | A | G | MYH11 | intron   | Subset1 | MeD-7    | 574  | 77   | 13.4 |
| chr16 | 15869796 | A | G | MYH11 | intron   | Subset1 | MeD-8    | 83   | 51   | 61.4 |
| chr16 | 15869796 | A | G | MYH11 | intron   | Subset1 | MeD-9    | 92   | 57   | 61.9 |
| chr16 | 15869796 | A | G | MYH11 | intron   | Subset1 | M-DCIS-8 | 77   | 40   | 51.9 |
| chr16 | 15869796 | A | G | MYH11 | intron   | Subset1 | M-DCIS-2 | 291  | 5    | 1.7  |
| chr16 | 15869796 | A | G | MYH11 | intron   | Subset1 | M-DCIS-3 | 6    | 2    | 33.3 |
| chr16 | 15869796 | A | G | MYH11 | intron   | Subset1 | M-DCIS-5 | 33   | 11   | 33.3 |
| chr16 | 15869796 | A | G | MYH11 | intron   | Subset1 | S1-11    | 187  | 78   | 41.7 |
| chr16 | 15869796 | A | G | MYH11 | intron   | Subset1 | S3-2     | 1862 | 609  | 32.7 |
| chr16 | 15869796 | A | G | MYH11 | intron   | Subset1 | S3-13    | 378  | 223  | 58.9 |
| chr16 | 15869796 | A | G | MYH11 | intron   | Subset1 | S3-3     | 225  | 21   | 9.3  |
| chr16 | 15869796 | A | G | MYH11 | intron   | Subset1 | S3-7     | 147  | 145  | 98.6 |
| chr16 | 15869796 | A | G | MYH11 | intron   | Subset1 | S1-12    | 69   | 3    | 4.3  |
| chr16 | 15869796 | A | G | MYH11 | intron   | Subset1 | S1-2     | 30   | 6    | 20   |
| chr16 | 15869796 | A | G | MYH11 | intron   | Subset1 | S1-9     | 35   | 26   | 74.2 |
| chr16 | 15869796 | A | G | MYH11 | intron   | Subset1 | S2-10    | 42   | 24   | 57.1 |
| chr16 | 15869796 | A | G | MYH11 | intron   | Subset1 | S2-4     | 155  | 3    | 1.9  |
| chr16 | 15869796 | A | G | MYH11 | intron   | Subset1 | S2-8     | 49   | 4    | 8.1  |
| chr21 | 36171600 | G | C | RUNX1 | nonsense | Subset1 | MeC-2    | 464  | 240  | 51.7 |
| chr21 | 36171600 | G | C | RUNX1 | nonsense | Subset1 | MeP-2    | 177  | 43   | 24.2 |
| chr21 | 36171600 | G | C | RUNX1 | nonsense | Subset1 | MeC-10   | 11   | 10   | 90.9 |
| chr21 | 36171600 | G | C | RUNX1 | nonsense | Subset1 | MeC-11   | 27   | 2    | 7.4  |
| chr21 | 36171600 | G | C | RUNX1 | nonsense | Subset1 | MeC-3    | 112  | 35   | 31.2 |
| chr21 | 36171600 | G | C | RUNX1 | nonsense | Subset1 | MeC-4    | 309  | 244  | 78.9 |
| chr21 | 36171600 | G | C | RUNX1 | nonsense | Subset1 | MeC-5    | 149  | 32   | 21.4 |
| chr21 | 36171600 | G | C | RUNX1 | nonsense | Subset1 | MeP-1    | 131  | 3    | 2.2  |
| chr21 | 36171600 | G | C | RUNX1 | nonsense | Subset1 | MeP-4    | 450  | 135  | 30   |
| chr21 | 36171600 | G | C | RUNX1 | nonsense | Subset1 | MeP-6    | 48   | 14   | 29.1 |
| chr21 | 36171600 | G | C | RUNX1 | nonsense | Subset1 | DCIS-2   | 24   | 2    | 8.3  |
| chr21 | 36171600 | G | C | RUNX1 | nonsense | Subset1 | DCIS-6   | 63   | 2    | 3.1  |
| chr21 | 36171600 | G | C | RUNX1 | nonsense | Subset1 | DCIS-8   | 51   | 14   | 27.4 |
| chr21 | 36171600 | G | C | RUNX1 | nonsense | Subset1 | InvF-11  | 144  | 2    | 1.3  |
| chr21 | 36171600 | G | C | RUNX1 | nonsense | Subset1 | InvF-13  | 32   | 9    | 28.1 |
| chr21 | 36171600 | G | C | RUNX1 | nonsense | Subset1 | InvF-9   | 101  | 32   | 31.6 |
| chr21 | 36171600 | G | C | RUNX1 | nonsense | Subset1 | MeD-2    | 81   | 14   | 17.2 |
| chr21 | 36171600 | G | C | RUNX1 | nonsense | Subset1 | MeD-4    | 110  | 3    | 2.7  |
| chr21 | 36171600 | G | C | RUNX1 | nonsense | Subset1 | MeD-7    | 177  | 15   | 8.4  |
| chr21 | 36171600 | G | C | RUNX1 | nonsense | Subset1 | MeD-8    | 98   | 4    | 4    |
| chr21 | 36171600 | G | C | RUNX1 | nonsense | Subset1 | MeD-9    | 61   | 20   | 32.7 |
| chr21 | 36171600 | G | C | RUNX1 | nonsense | Subset1 | M-DCIS-8 | 114  | 6    | 5.2  |
| chr21 | 36171600 | G | C | RUNX1 | nonsense | Subset1 | M-DCIS-2 | 1448 | 1334 | 92.1 |
| chr21 | 36171600 | G | C | RUNX1 | nonsense | Subset1 | S1-11    | 165  | 72   | 43.6 |
| chr21 | 36171600 | G | C | RUNX1 | nonsense | Subset1 | S3-13    | 222  | 21   | 9.4  |
| chr21 | 36171600 | G | C | RUNX1 | nonsense | Subset1 | S3-7     | 261  | 98   | 37.5 |
| chr21 | 36171600 | G | C | RUNX1 | nonsense | Subset1 | S1-12    | 95   | 2    | 2.1  |
| chr21 | 36171600 | G | C | RUNX1 | nonsense | Subset1 | S1-2     | 13   | 6    | 46.1 |
| chr21 | 36171600 | G | C | RUNX1 | nonsense | Subset1 | S1-6     | 98   | 30   | 30.6 |
| chr21 | 36171600 | G | C | RUNX1 | nonsense | Subset1 | S1-9     | 308  | 35   | 11.3 |
| chr12 | 45210076 | T | A | NELL2 | intron   | Subset1 | MeC-2    | 124  | 25   | 20.1 |
| chr12 | 45210076 | T | A | NELL2 | intron   | Subset1 | MeC-3    | 34   | 2    | 5.8  |
| chr12 | 45210076 | T | A | NELL2 | intron   | Subset1 | MeC-4    | 153  | 8    | 5.2  |
| chr12 | 45210076 | T | A | NELL2 | intron   | Subset1 | MeC-5    | 29   | 14   | 48.2 |
| chr12 | 45210076 | T | A | NELL2 | intron   | Subset1 | MeP-4    | 89   | 14   | 15.7 |
| chr12 | 45210076 | T | A | NELL2 | intron   | Subset1 | MeP-5    | 103  | 2    | 1.9  |

|       |           |   |   |          |            |         |          |     |     |      |
|-------|-----------|---|---|----------|------------|---------|----------|-----|-----|------|
| chr12 | 45210076  | T | A | NELL2    | intron     | Subset1 | MeP-6    | 99  | 5   | 5    |
| chr12 | 45210076  | T | A | NELL2    | intron     | Subset1 | DCIS-1   | 50  | 8   | 16   |
| chr12 | 45210076  | T | A | NELL2    | intron     | Subset1 | DCIS-6   | 145 | 13  | 8.9  |
| chr12 | 45210076  | T | A | NELL2    | intron     | Subset1 | DCIS-8   | 46  | 2   | 4.3  |
| chr12 | 45210076  | T | A | NELL2    | intron     | Subset1 | InvF-10  | 48  | 5   | 10.4 |
| chr12 | 45210076  | T | A | NELL2    | intron     | Subset1 | InvF-4   | 532 | 309 | 58   |
| chr12 | 45210076  | T | A | NELL2    | intron     | Subset1 | InvF-5   | 43  | 11  | 25.5 |
| chr12 | 45210076  | T | A | NELL2    | intron     | Subset1 | InvF-9   | 173 | 103 | 59.5 |
| chr12 | 45210076  | T | A | NELL2    | intron     | Subset1 | MeD-2    | 131 | 41  | 31.2 |
| chr12 | 45210076  | T | A | NELL2    | intron     | Subset1 | MeD-7    | 141 | 30  | 21.2 |
| chr12 | 45210076  | T | A | NELL2    | intron     | Subset1 | MeD-8    | 41  | 3   | 7.3  |
| chr12 | 45210076  | T | A | NELL2    | intron     | Subset1 | MeD-9    | 97  | 67  | 69   |
| chr12 | 45210076  | T | A | NELL2    | intron     | Subset1 | M-DCIS-2 | 75  | 12  | 16   |
| chr12 | 45210076  | T | A | NELL2    | intron     | Subset1 | M-DCIS-5 | 164 | 2   | 1.2  |
| chr12 | 45210076  | T | A | NELL2    | intron     | Subset1 | S1-11    | 229 | 149 | 65   |
| chr12 | 45210076  | T | A | NELL2    | intron     | Subset1 | S3-2     | 28  | 10  | 35.7 |
| chr12 | 45210076  | T | A | NELL2    | intron     | Subset1 | S3-3     | 23  | 2   | 8.6  |
| chr12 | 45210076  | T | A | NELL2    | intron     | Subset1 | S1-6     | 320 | 55  | 17.1 |
| chr4  | 169157501 | C | T | DDX60    | missense   | Subset2 | BN-12    | 185 | 16  | 8.6  |
| chr4  | 169157501 | C | T | DDX60    | missense   | Subset2 | BN-5     | 59  | 15  | 25.4 |
| chr4  | 169157501 | C | T | DDX60    | missense   | Subset2 | BN-11    | 10  | 2   | 20   |
| chr4  | 169157501 | C | T | DDX60    | missense   | Subset2 | BNM-1    | 28  | 4   | 14.2 |
| chr4  | 169157501 | C | T | DDX60    | missense   | Subset2 | BNM-2    | 70  | 14  | 20   |
| chr4  | 169157501 | C | T | DDX60    | missense   | Subset2 | BNM-3    | 51  | 3   | 5.8  |
| chr17 | 74562208  | A | G | ST6GALNA | (missense) | Subset3 | MeC-3    | 52  | 36  | 69.2 |
| chr17 | 74562208  | A | G | ST6GALNA | (missense) | Subset3 | MeP-1    | 300 | 21  | 7    |
| chr17 | 74562208  | A | G | ST6GALNA | (missense) | Subset3 | MeP-12   | 32  | 2   | 6.2  |
| chr17 | 74562208  | A | G | ST6GALNA | (missense) | Subset3 | InvF-1   | 3   | 3   | 100  |
| chr17 | 74562208  | A | G | ST6GALNA | (missense) | Subset3 | MeD-7    | 15  | 2   | 13.3 |
| chr17 | 74562208  | A | G | ST6GALNA | (missense) | Subset3 | S1-11    | 103 | 3   | 2.9  |
| chr17 | 74562208  | A | G | ST6GALNA | (missense) | Subset3 | S2-4     | 14  | 2   | 14.2 |
| chr17 | 74562208  | A | G | ST6GALNA | (missense) | Subset3 | S2-8     | 50  | 6   | 12   |
| chr17 | 74562208  | A | G | ST6GALNA | (missense) | Subset3 | S2-9     | 31  | 6   | 19.3 |
| chr15 | 60803463  | T | C | RORA     | missense   | Subset2 | BN-1     | 63  | 2   | 3.1  |
| chr15 | 60803463  | T | C | RORA     | missense   | Subset2 | BN-13    | 126 | 4   | 3.1  |
| chr15 | 60803463  | T | C | RORA     | missense   | Subset2 | BN-12    | 741 | 12  | 1.6  |
| chr15 | 60803463  | T | C | RORA     | missense   | Subset2 | BN-5     | 175 | 3   | 1.7  |
| chr15 | 60803463  | T | C | RORA     | missense   | Subset2 | BN-11    | 41  | 5   | 12.1 |
| chr15 | 60803463  | T | C | RORA     | missense   | Subset2 | BNM-1    | 64  | 4   | 6.2  |
| chr15 | 60803463  | T | C | RORA     | missense   | Subset2 | BNM-2    | 29  | 4   | 13.7 |
| chr15 | 60803463  | T | C | RORA     | missense   | Subset2 | BNM-3    | 38  | 2   | 5.2  |
| chr9  | 21216889  | G | C | IFNA16   | missense   | Subset2 | BNM-1    | 80  | 5   | 6.2  |
| chr9  | 21216889  | G | C | IFNA16   | missense   | Subset2 | BNM-2    | 212 | 36  | 16.9 |
| chr9  | 21216889  | G | C | IFNA16   | missense   | Subset2 | BNM-3    | 145 | 15  | 10.3 |
| chr5  | 149562433 | G | A | CDX1     | missense   | Subset1 | MeC-2    | 198 | 151 | 76.2 |
| chr5  | 149562433 | G | A | CDX1     | missense   | Subset1 | MeC-10   | 9   | 4   | 44.4 |
| chr5  | 149562433 | G | A | CDX1     | missense   | Subset1 | MeC-3    | 48  | 35  | 72.9 |
| chr5  | 149562433 | G | A | CDX1     | missense   | Subset1 | MeC-4    | 109 | 79  | 72.4 |
| chr5  | 149562433 | G | A | CDX1     | missense   | Subset1 | MeC-5    | 8   | 5   | 62.5 |
| chr5  | 149562433 | G | A | CDX1     | missense   | Subset1 | MeP-18   | 11  | 11  | 100  |
| chr5  | 149562433 | G | A | CDX1     | missense   | Subset1 | MeP-4    | 32  | 7   | 21.8 |
| chr5  | 149562433 | G | A | CDX1     | missense   | Subset1 | MeP-6    | 49  | 3   | 6.1  |
| chr5  | 149562433 | G | A | CDX1     | missense   | Subset1 | DCIS-1   | 44  | 2   | 4.5  |
| chr5  | 149562433 | G | A | CDX1     | missense   | Subset1 | DCIS-2   | 24  | 8   | 33.3 |
| chr5  | 149562433 | G | A | CDX1     | missense   | Subset1 | DCIS-6   | 146 | 2   | 1.3  |

|       |           |   |   |        |          |         |          |     |     |      |
|-------|-----------|---|---|--------|----------|---------|----------|-----|-----|------|
| chr5  | 149562433 | G | A | CDX1   | missense | Subset1 | InvF-10  | 10  | 8   | 80   |
| chr5  | 149562433 | G | A | CDX1   | missense | Subset1 | InvF-11  | 23  | 5   | 21.7 |
| chr5  | 149562433 | G | A | CDX1   | missense | Subset1 | InvF-13  | 21  | 18  | 85.7 |
| chr5  | 149562433 | G | A | CDX1   | missense | Subset1 | InvF-9   | 58  | 24  | 41.3 |
| chr5  | 149562433 | G | A | CDX1   | missense | Subset1 | MeD-2    | 11  | 2   | 18.1 |
| chr5  | 149562433 | G | A | CDX1   | missense | Subset1 | MeD-4    | 16  | 2   | 12.5 |
| chr5  | 149562433 | G | A | CDX1   | missense | Subset1 | MeD-7    | 94  | 4   | 4.2  |
| chr5  | 149562433 | G | A | CDX1   | missense | Subset1 | MeD-9    | 11  | 5   | 45.4 |
| chr5  | 149562433 | G | A | CDX1   | missense | Subset1 | M-DCIS-2 | 65  | 22  | 33.8 |
| chr5  | 149562433 | G | A | CDX1   | missense | Subset1 | S1-11    | 23  | 8   | 34.7 |
| chr5  | 149562433 | G | A | CDX1   | missense | Subset1 | S3-2     | 7   | 4   | 57.1 |
| chr5  | 149562433 | G | A | CDX1   | missense | Subset1 | S3-13    | 72  | 38  | 52.7 |
| chr5  | 149562433 | G | A | CDX1   | missense | Subset1 | S3-7     | 20  | 4   | 20   |
| chr5  | 149562433 | G | A | CDX1   | missense | Subset1 | S1-2     | 7   | 7   | 100  |
| chr5  | 149562433 | G | A | CDX1   | missense | Subset1 | S1-9     | 7   | 5   | 71.4 |
| chr5  | 149562433 | G | A | CDX1   | missense | Subset1 | S2-14    | 199 | 30  | 15   |
| chr5  | 149562433 | G | A | CDX1   | missense | Subset1 | S2-13    | 9   | 7   | 77.7 |
| chr9  | 134090452 | T | C | NUP214 | intron   | Subset3 | DCIS-1   | 434 | 5   | 1.1  |
| chr9  | 134090452 | T | C | NUP214 | intron   | Subset3 | DCIS-3   | 256 | 3   | 1.1  |
| chr9  | 134090452 | T | C | NUP214 | intron   | Subset3 | DCIS-6   | 284 | 19  | 6.6  |
| chr9  | 134090452 | T | C | NUP214 | intron   | Subset3 | DCIS-8   | 79  | 5   | 6.3  |
| chr9  | 134090452 | T | C | NUP214 | intron   | Subset3 | InvF-10  | 287 | 26  | 9    |
| chr9  | 134090452 | T | C | NUP214 | intron   | Subset3 | InvF-9   | 201 | 5   | 2.4  |
| chr9  | 134090452 | T | C | NUP214 | intron   | Subset3 | Ly-10    | 272 | 27  | 9.9  |
| chr9  | 134090452 | T | C | NUP214 | intron   | Subset3 | MeD-2    | 389 | 7   | 1.7  |
| chr9  | 134090452 | T | C | NUP214 | intron   | Subset3 | MeD-4    | 473 | 33  | 6.9  |
| chr9  | 134090452 | T | C | NUP214 | intron   | Subset3 | MeD-7    | 129 | 13  | 10   |
| chr9  | 134090452 | T | C | NUP214 | intron   | Subset3 | MeD-8    | 354 | 25  | 7    |
| chr9  | 134090452 | T | C | NUP214 | intron   | Subset3 | M-DCIS-8 | 57  | 16  | 28   |
| chr9  | 134090452 | T | C | NUP214 | intron   | Subset3 | M-DCIS-5 | 97  | 3   | 3    |
| chr9  | 134090452 | T | C | NUP214 | intron   | Subset3 | S1-11    | 813 | 29  | 3.5  |
| chr9  | 134090452 | T | C | NUP214 | intron   | Subset3 | S1-2     | 221 | 11  | 4.9  |
| chr9  | 134090452 | T | C | NUP214 | intron   | Subset3 | S1-4     | 15  | 2   | 13.3 |
| chr9  | 134090452 | T | C | NUP214 | intron   | Subset3 | S1-6     | 425 | 132 | 31   |
| chr9  | 134090452 | T | C | NUP214 | intron   | Subset3 | S2-14    | 253 | 5   | 1.9  |
| chr9  | 134090452 | T | C | NUP214 | intron   | Subset3 | S2-13    | 362 | 61  | 16.8 |
| chr9  | 134090452 | T | C | NUP214 | intron   | Subset3 | S2-4     | 387 | 10  | 2.5  |
| chr13 | 28611324  | C | G | FLT3   | missense | Subset1 | MeC-2    | 18  | 4   | 22.2 |
| chr13 | 28611324  | C | G | FLT3   | missense | Subset1 | MeP-2    | 575 | 414 | 72   |
| chr13 | 28611324  | C | G | FLT3   | missense | Subset1 | MeC-3    | 28  | 2   | 7.1  |
| chr13 | 28611324  | C | G | FLT3   | missense | Subset1 | MeC-4    | 124 | 46  | 37   |
| chr13 | 28611324  | C | G | FLT3   | missense | Subset1 | MeC-5    | 56  | 2   | 3.5  |
| chr13 | 28611324  | C | G | FLT3   | missense | Subset1 | MeP-1    | 105 | 3   | 2.8  |
| chr13 | 28611324  | C | G | FLT3   | missense | Subset1 | MeP-4    | 57  | 29  | 50.8 |
| chr13 | 28611324  | C | G | FLT3   | missense | Subset1 | MeP-5    | 138 | 3   | 2.1  |
| chr13 | 28611324  | C | G | FLT3   | missense | Subset1 | MeP-6    | 226 | 216 | 95.5 |
| chr13 | 28611324  | C | G | FLT3   | missense | Subset1 | DCIS-1   | 76  | 8   | 10.5 |
| chr13 | 28611324  | C | G | FLT3   | missense | Subset1 | DCIS-6   | 159 | 82  | 51.5 |
| chr13 | 28611324  | C | G | FLT3   | missense | Subset1 | DCIS-8   | 57  | 8   | 14   |
| chr13 | 28611324  | C | G | FLT3   | missense | Subset1 | InvF-4   | 7   | 6   | 85.7 |
| chr13 | 28611324  | C | G | FLT3   | missense | Subset1 | InvF-9   | 18  | 5   | 27.7 |
| chr13 | 28611324  | C | G | FLT3   | missense | Subset1 | MeD-2    | 42  | 11  | 26.1 |
| chr13 | 28611324  | C | G | FLT3   | missense | Subset1 | MeD-7    | 182 | 14  | 7.6  |
| chr13 | 28611324  | C | G | FLT3   | missense | Subset1 | MeD-8    | 92  | 30  | 32.6 |
| chr13 | 28611324  | C | G | FLT3   | missense | Subset1 | MeD-9    | 95  | 55  | 57.8 |

|       |           |   |   |          |              |         |          |      |     |      |
|-------|-----------|---|---|----------|--------------|---------|----------|------|-----|------|
| chr13 | 28611324  | C | G | FLT3     | missense     | Subset1 | M-DCIS-8 | 157  | 13  | 8.2  |
| chr13 | 28611324  | C | G | FLT3     | missense     | Subset1 | M-DCIS-2 | 166  | 44  | 26.5 |
| chr13 | 28611324  | C | G | FLT3     | missense     | Subset1 | S1-11    | 301  | 181 | 60.1 |
| chr13 | 28611324  | C | G | FLT3     | missense     | Subset1 | S3-1     | 47   | 28  | 59.5 |
| chr13 | 28611324  | C | G | FLT3     | missense     | Subset1 | S3-13    | 157  | 121 | 77   |
| chr13 | 28611324  | C | G | FLT3     | missense     | Subset1 | S3-7     | 72   | 28  | 38.8 |
| chr13 | 28611324  | C | G | FLT3     | missense     | Subset1 | S1-2     | 88   | 15  | 17   |
| chr13 | 28611324  | C | G | FLT3     | missense     | Subset1 | S1-6     | 81   | 3   | 3.7  |
| chr13 | 28611324  | C | G | FLT3     | missense     | Subset1 | S1-9     | 45   | 14  | 31.1 |
| chr13 | 28611324  | C | G | FLT3     | missense     | Subset1 | S2-14    | 68   | 2   | 2.9  |
| chr13 | 28611324  | C | G | FLT3     | missense     | Subset1 | S2-4     | 131  | 11  | 8.3  |
| chr5  | 73141983  | A | G | ARHGEF28 | intron       | Subset2 | BN-3     | 19   | 6   | 31.5 |
| chr5  | 73141983  | A | G | ARHGEF28 | intron       | Subset2 | BN-5     | 48   | 8   | 16.6 |
| chr5  | 73141983  | A | G | ARHGEF28 | intron       | Subset2 | BNM-3    | 16   | 3   | 18.7 |
| chr7  | 138603490 | G | A | KIAA1549 | coding-synon | Subset2 | BN-1     | 4    | 2   | 50   |
| chr7  | 138603490 | G | A | KIAA1549 | coding-synon | Subset2 | BN-13    | 90   | 7   | 7.7  |
| chr7  | 138603490 | G | A | KIAA1549 | coding-synon | Subset2 | BN-4     | 98   | 15  | 15.3 |
| chr7  | 138603490 | G | A | KIAA1549 | coding-synon | Subset2 | BN-5     | 295  | 67  | 22.7 |
| chr7  | 138603490 | G | A | KIAA1549 | coding-synon | Subset2 | BN-11    | 155  | 10  | 6.4  |
| chr7  | 138603490 | G | A | KIAA1549 | coding-synon | Subset2 | BNM-1    | 30   | 4   | 13.3 |
| chr7  | 138603490 | G | A | KIAA1549 | coding-synon | Subset2 | BNM-2    | 41   | 7   | 17   |
| chr7  | 138603490 | G | A | KIAA1549 | coding-synon | Subset2 | BNM-3    | 76   | 5   | 6.5  |
| chr2  | 201719959 | G | A | CLK1     | intron       | Subset2 | BN-13    | 68   | 55  | 80.8 |
| chr2  | 201719959 | G | A | CLK1     | intron       | Subset2 | BN-12    | 46   | 5   | 10.8 |
| chr2  | 201719959 | G | A | CLK1     | intron       | Subset2 | BN-5     | 32   | 4   | 12.5 |
| chr2  | 201719959 | G | A | CLK1     | intron       | Subset2 | BN-11    | 17   | 6   | 35.2 |
| chr2  | 201719959 | G | A | CLK1     | intron       | Subset2 | BN-15    | 8    | 3   | 37.5 |
| chr2  | 201719959 | G | A | CLK1     | intron       | Subset2 | BNM-2    | 8    | 2   | 25   |
| chr2  | 201719959 | G | A | CLK1     | intron       | Subset2 | BNM-3    | 9    | 2   | 22.2 |
| chr8  | 41529867  | C | T | ANK1     | intron       | Subset1 | MeC-2    | 294  | 282 | 95.9 |
| chr8  | 41529867  | C | T | ANK1     | intron       | Subset1 | MeC-20   | 56   | 54  | 96.4 |
| chr8  | 41529867  | C | T | ANK1     | intron       | Subset1 | MeC-4    | 106  | 15  | 14.1 |
| chr8  | 41529867  | C | T | ANK1     | intron       | Subset1 | MeC-5    | 2    | 2   | 100  |
| chr8  | 41529867  | C | T | ANK1     | intron       | Subset1 | MeP-18   | 8    | 2   | 25   |
| chr8  | 41529867  | C | T | ANK1     | intron       | Subset1 | MeP-4    | 126  | 6   | 4.7  |
| chr8  | 41529867  | C | T | ANK1     | intron       | Subset1 | MeP-5    | 29   | 2   | 6.8  |
| chr8  | 41529867  | C | T | ANK1     | intron       | Subset1 | MeP-6    | 228  | 18  | 7.8  |
| chr8  | 41529867  | C | T | ANK1     | intron       | Subset1 | DCIS-1   | 28   | 2   | 7.1  |
| chr8  | 41529867  | C | T | ANK1     | intron       | Subset1 | DCIS-3   | 53   | 3   | 5.6  |
| chr8  | 41529867  | C | T | ANK1     | intron       | Subset1 | DCIS-8   | 30   | 2   | 6.6  |
| chr8  | 41529867  | C | T | ANK1     | intron       | Subset1 | MeD-2    | 31   | 4   | 12.9 |
| chr8  | 41529867  | C | T | ANK1     | intron       | Subset1 | MeD-7    | 197  | 3   | 1.5  |
| chr8  | 41529867  | C | T | ANK1     | intron       | Subset1 | MeD-9    | 77   | 25  | 32.4 |
| chr8  | 41529867  | C | T | ANK1     | intron       | Subset1 | M-DCIS-2 | 34   | 2   | 5.8  |
| chr8  | 41529867  | C | T | ANK1     | intron       | Subset1 | S1-11    | 13   | 5   | 38.4 |
| chr8  | 41529867  | C | T | ANK1     | intron       | Subset1 | S3-2     | 16   | 3   | 18.7 |
| chr8  | 41529867  | C | T | ANK1     | intron       | Subset1 | S3-13    | 240  | 15  | 6.2  |
| chr8  | 41529867  | C | T | ANK1     | intron       | Subset1 | S1-2     | 45   | 2   | 4.4  |
| chr8  | 41529867  | C | T | ANK1     | intron       | Subset1 | S2-13    | 7292 | 286 | 3.9  |
| chr14 | 73725856  | G | A | PAPLN    | intron       | Subset1 | MeC-2    | 47   | 12  | 25.5 |
| chr14 | 73725856  | G | A | PAPLN    | intron       | Subset1 | MeC-4    | 26   | 6   | 23   |
| chr14 | 73725856  | G | A | PAPLN    | intron       | Subset1 | MeC-5    | 6    | 4   | 66.6 |
| chr14 | 73725856  | G | A | PAPLN    | intron       | Subset1 | MeP-18   | 9    | 9   | 100  |
| chr14 | 73725856  | G | A | PAPLN    | intron       | Subset1 | MeP-4    | 88   | 76  | 86.3 |
| chr14 | 73725856  | G | A | PAPLN    | intron       | Subset1 | MeP-6    | 42   | 30  | 71.4 |

|       |           |   |   |        |              |         |          |     |     |      |
|-------|-----------|---|---|--------|--------------|---------|----------|-----|-----|------|
| chr14 | 73725856  | G | A | PAPLN  | intron       | Subset1 | DCIS-1   | 62  | 48  | 77.4 |
| chr14 | 73725856  | G | A | PAPLN  | intron       | Subset1 | DCIS-3   | 36  | 2   | 5.5  |
| chr14 | 73725856  | G | A | PAPLN  | intron       | Subset1 | InvF-10  | 118 | 34  | 28.8 |
| chr14 | 73725856  | G | A | PAPLN  | intron       | Subset1 | InvF-4   | 75  | 70  | 93.3 |
| chr14 | 73725856  | G | A | PAPLN  | intron       | Subset1 | InvF-5   | 106 | 10  | 9.4  |
| chr14 | 73725856  | G | A | PAPLN  | intron       | Subset1 | InvF-1   | 6   | 2   | 33.3 |
| chr14 | 73725856  | G | A | PAPLN  | intron       | Subset1 | MeD-9    | 20  | 4   | 20   |
| chr14 | 73725856  | G | A | PAPLN  | intron       | Subset1 | S1-11    | 31  | 5   | 16.1 |
| chr14 | 73725856  | G | A | PAPLN  | intron       | Subset1 | S3-2     | 268 | 100 | 37.3 |
| chr14 | 73725856  | G | A | PAPLN  | intron       | Subset1 | S3-7     | 61  | 61  | 100  |
| chr14 | 73725856  | G | A | PAPLN  | intron       | Subset1 | S1-1     | 4   | 4   | 100  |
| chr14 | 73725856  | G | A | PAPLN  | intron       | Subset1 | S1-6     | 16  | 2   | 12.5 |
| chrX  | 21444725  | C | T | CNKSR2 | missense     | Subset3 | MeP-1    | 39  | 2   | 5.1  |
| chrX  | 21444725  | C | T | CNKSR2 | missense     | Subset3 | MeP-6    | 69  | 5   | 7.2  |
| chrX  | 21444725  | C | T | CNKSR2 | missense     | Subset3 | DCIS-1   | 127 | 30  | 23.6 |
| chrX  | 21444725  | C | T | CNKSR2 | missense     | Subset3 | DCIS-8   | 48  | 5   | 10.4 |
| chrX  | 21444725  | C | T | CNKSR2 | missense     | Subset3 | InvF-1   | 160 | 31  | 19.3 |
| chrX  | 21444725  | C | T | CNKSR2 | missense     | Subset3 | InvF-11  | 91  | 2   | 2.1  |
| chrX  | 21444725  | C | T | CNKSR2 | missense     | Subset3 | InvF-13  | 8   | 6   | 75   |
| chrX  | 21444725  | C | T | CNKSR2 | missense     | Subset3 | MeD-4    | 150 | 10  | 6.6  |
| chrX  | 21444725  | C | T | CNKSR2 | missense     | Subset3 | Ly-5     | 208 | 139 | 66.8 |
| chrX  | 21444725  | C | T | CNKSR2 | missense     | Subset3 | MeD-7    | 96  | 16  | 16.6 |
| chrX  | 21444725  | C | T | CNKSR2 | missense     | Subset3 | M-DCIS-5 | 112 | 38  | 33.9 |
| chrX  | 21444725  | C | T | CNKSR2 | missense     | Subset3 | S1-11    | 321 | 6   | 1.8  |
| chrX  | 21444725  | C | T | CNKSR2 | missense     | Subset3 | S3-1     | 451 | 125 | 27.7 |
| chrX  | 21444725  | C | T | CNKSR2 | missense     | Subset3 | S3-13    | 125 | 7   | 5.6  |
| chrX  | 21444725  | C | T | CNKSR2 | missense     | Subset3 | S2-14    | 50  | 3   | 6    |
| chrX  | 21444725  | C | T | CNKSR2 | missense     | Subset3 | S2-2     | 146 | 2   | 1.3  |
| chrX  | 21444725  | C | T | CNKSR2 | missense     | Subset3 | S2-4     | 381 | 12  | 3.1  |
| chrX  | 21444725  | C | T | CNKSR2 | missense     | Subset3 | S2-9     | 132 | 12  | 9    |
| chrX  | 21444725  | C | T | CNKSR2 | missense     | Subset3 | BN-4     | 31  | 2   | 6.4  |
| chrX  | 21444725  | C | T | CNKSR2 | missense     | Subset3 | BN-5     | 122 | 2   | 1.6  |
| chr1  | 235345135 | G | A | ARID4B | coding-synon | Subset1 | MeC-2    | 302 | 106 | 35   |
| chr1  | 235345135 | G | A | ARID4B | coding-synon | Subset1 | MeP-2    | 242 | 139 | 57.4 |
| chr1  | 235345135 | G | A | ARID4B | coding-synon | Subset1 | MeC-1    | 38  | 3   | 7.8  |
| chr1  | 235345135 | G | A | ARID4B | coding-synon | Subset1 | MeC-3    | 182 | 155 | 85.1 |
| chr1  | 235345135 | G | A | ARID4B | coding-synon | Subset1 | MeC-4    | 187 | 42  | 22.4 |
| chr1  | 235345135 | G | A | ARID4B | coding-synon | Subset1 | MeC-5    | 25  | 13  | 52   |
| chr1  | 235345135 | G | A | ARID4B | coding-synon | Subset1 | MeP-18   | 6   | 3   | 50   |
| chr1  | 235345135 | G | A | ARID4B | coding-synon | Subset1 | MeP-4    | 226 | 77  | 34   |
| chr1  | 235345135 | G | A | ARID4B | coding-synon | Subset1 | MeP-6    | 83  | 46  | 55.4 |
| chr1  | 235345135 | G | A | ARID4B | coding-synon | Subset1 | DCIS-1   | 71  | 8   | 11.2 |
| chr1  | 235345135 | G | A | ARID4B | coding-synon | Subset1 | DCIS-2   | 45  | 8   | 17.7 |
| chr1  | 235345135 | G | A | ARID4B | coding-synon | Subset1 | DCIS-3   | 113 | 9   | 7.9  |
| chr1  | 235345135 | G | A | ARID4B | coding-synon | Subset1 | DCIS-6   | 83  | 17  | 20.4 |
| chr1  | 235345135 | G | A | ARID4B | coding-synon | Subset1 | DCIS-8   | 75  | 21  | 28   |
| chr1  | 235345135 | G | A | ARID4B | coding-synon | Subset1 | InvF-10  | 10  | 6   | 60   |
| chr1  | 235345135 | G | A | ARID4B | coding-synon | Subset1 | InvF-4   | 232 | 227 | 97.8 |
| chr1  | 235345135 | G | A | ARID4B | coding-synon | Subset1 | InvF-5   | 2   | 2   | 100  |
| chr1  | 235345135 | G | A | ARID4B | coding-synon | Subset1 | InvF-12  | 18  | 14  | 77.7 |
| chr1  | 235345135 | G | A | ARID4B | coding-synon | Subset1 | InvF-13  | 3   | 2   | 66.6 |
| chr1  | 235345135 | G | A | ARID4B | coding-synon | Subset1 | InvF-9   | 233 | 174 | 74.6 |
| chr1  | 235345135 | G | A | ARID4B | coding-synon | Subset1 | MeD-2    | 187 | 57  | 30.4 |
| chr1  | 235345135 | G | A | ARID4B | coding-synon | Subset1 | MeD-4    | 140 | 9   | 6.4  |
| chr1  | 235345135 | G | A | ARID4B | coding-synon | Subset1 | MeD-7    | 486 | 172 | 35.3 |

|      |           |   |   |        |              |         |          |      |      |      |
|------|-----------|---|---|--------|--------------|---------|----------|------|------|------|
| chr1 | 235345135 | G | A | ARID4B | coding-synon | Subset1 | MeD-8    | 205  | 104  | 50.7 |
| chr1 | 235345135 | G | A | ARID4B | coding-synon | Subset1 | MeD-9    | 260  | 93   | 35.7 |
| chr1 | 235345135 | G | A | ARID4B | coding-synon | Subset1 | M-DCIS-8 | 697  | 159  | 22.8 |
| chr1 | 235345135 | G | A | ARID4B | coding-synon | Subset1 | M-DCIS-2 | 82   | 4    | 4.8  |
| chr1 | 235345135 | G | A | ARID4B | coding-synon | Subset1 | M-DCIS-4 | 12   | 2    | 16.6 |
| chr1 | 235345135 | G | A | ARID4B | coding-synon | Subset1 | M-DCIS-5 | 144  | 77   | 53.4 |
| chr1 | 235345135 | G | A | ARID4B | coding-synon | Subset1 | S1-11    | 856  | 187  | 21.8 |
| chr1 | 235345135 | G | A | ARID4B | coding-synon | Subset1 | S3-2     | 6    | 6    | 100  |
| chr1 | 235345135 | G | A | ARID4B | coding-synon | Subset1 | S3-1     | 368  | 183  | 49.7 |
| chr1 | 235345135 | G | A | ARID4B | coding-synon | Subset1 | S3-13    | 265  | 12   | 4.5  |
| chr1 | 235345135 | G | A | ARID4B | coding-synon | Subset1 | S3-7     | 131  | 47   | 35.8 |
| chr1 | 235345135 | G | A | ARID4B | coding-synon | Subset1 | S1-1     | 341  | 16   | 4.6  |
| chr1 | 235345135 | G | A | ARID4B | coding-synon | Subset1 | S1-2     | 64   | 25   | 39   |
| chr1 | 235345135 | G | A | ARID4B | coding-synon | Subset1 | S1-6     | 84   | 22   | 26.1 |
| chr1 | 235345135 | G | A | ARID4B | coding-synon | Subset1 | S1-9     | 238  | 38   | 15.9 |
| chr1 | 235345135 | G | A | ARID4B | coding-synon | Subset1 | S2-13    | 2    | 2    | 100  |
| chr1 | 235345135 | G | A | ARID4B | coding-synon | Subset1 | S2-4     | 204  | 7    | 3.4  |
| chr1 | 235345135 | G | A | ARID4B | coding-synon | Subset1 | S2-5     | 15   | 2    | 13.3 |
| chr1 | 235345135 | G | A | ARID4B | coding-synon | Subset1 | S2-8     | 77   | 4    | 5.1  |
| chrX | 24597532  | C | T | PCYT1B | coding-synon | Subset1 | MeC-2    | 267  | 54   | 20.2 |
| chrX | 24597532  | C | T | PCYT1B | coding-synon | Subset1 | MeP-2    | 493  | 250  | 50.7 |
| chrX | 24597532  | C | T | PCYT1B | coding-synon | Subset1 | MeC-3    | 137  | 59   | 43   |
| chrX | 24597532  | C | T | PCYT1B | coding-synon | Subset1 | MeC-4    | 290  | 152  | 52.4 |
| chrX | 24597532  | C | T | PCYT1B | coding-synon | Subset1 | MeC-5    | 45   | 45   | 100  |
| chrX | 24597532  | C | T | PCYT1B | coding-synon | Subset1 | MeC-8    | 118  | 7    | 5.9  |
| chrX | 24597532  | C | T | PCYT1B | coding-synon | Subset1 | MeP-4    | 327  | 303  | 92.6 |
| chrX | 24597532  | C | T | PCYT1B | coding-synon | Subset1 | MeP-5    | 43   | 12   | 27.9 |
| chrX | 24597532  | C | T | PCYT1B | coding-synon | Subset1 | MeP-6    | 605  | 31   | 5.1  |
| chrX | 24597532  | C | T | PCYT1B | coding-synon | Subset1 | DCIS-1   | 193  | 8    | 4.1  |
| chrX | 24597532  | C | T | PCYT1B | coding-synon | Subset1 | DCIS-3   | 65   | 10   | 15.3 |
| chrX | 24597532  | C | T | PCYT1B | coding-synon | Subset1 | DCIS-5   | 12   | 5    | 41.6 |
| chrX | 24597532  | C | T | PCYT1B | coding-synon | Subset1 | DCIS-6   | 69   | 57   | 82.6 |
| chrX | 24597532  | C | T | PCYT1B | coding-synon | Subset1 | DCIS-8   | 91   | 14   | 15.3 |
| chrX | 24597532  | C | T | PCYT1B | coding-synon | Subset1 | InvF-10  | 609  | 83   | 13.6 |
| chrX | 24597532  | C | T | PCYT1B | coding-synon | Subset1 | InvF-4   | 56   | 10   | 17.8 |
| chrX | 24597532  | C | T | PCYT1B | coding-synon | Subset1 | InvF-13  | 10   | 5    | 50   |
| chrX | 24597532  | C | T | PCYT1B | coding-synon | Subset1 | MeD-2    | 190  | 34   | 17.8 |
| chrX | 24597532  | C | T | PCYT1B | coding-synon | Subset1 | MeD-4    | 313  | 18   | 5.7  |
| chrX | 24597532  | C | T | PCYT1B | coding-synon | Subset1 | MeD-7    | 253  | 34   | 13.4 |
| chrX | 24597532  | C | T | PCYT1B | coding-synon | Subset1 | MeD-8    | 169  | 21   | 12.4 |
| chrX | 24597532  | C | T | PCYT1B | coding-synon | Subset1 | MeD-9    | 203  | 117  | 57.6 |
| chrX | 24597532  | C | T | PCYT1B | coding-synon | Subset1 | M-DCIS-8 | 143  | 93   | 65   |
| chrX | 24597532  | C | T | PCYT1B | coding-synon | Subset1 | M-DCIS-2 | 190  | 3    | 1.5  |
| chrX | 24597532  | C | T | PCYT1B | coding-synon | Subset1 | S1-11    | 288  | 110  | 38.1 |
| chrX | 24597532  | C | T | PCYT1B | coding-synon | Subset1 | S3-2     | 1210 | 260  | 21.4 |
| chrX | 24597532  | C | T | PCYT1B | coding-synon | Subset1 | S3-13    | 581  | 29   | 4.9  |
| chrX | 24597532  | C | T | PCYT1B | coding-synon | Subset1 | S3-3     | 1137 | 35   | 3    |
| chrX | 24597532  | C | T | PCYT1B | coding-synon | Subset1 | S3-7     | 49   | 26   | 53   |
| chrX | 24597532  | C | T | PCYT1B | coding-synon | Subset1 | S1-1     | 1194 | 1193 | 99.9 |
| chrX | 24597532  | C | T | PCYT1B | coding-synon | Subset1 | S1-6     | 149  | 57   | 38.2 |
| chrX | 24597532  | C | T | PCYT1B | coding-synon | Subset1 | S1-9     | 138  | 2    | 1.4  |
| chrX | 24597532  | C | T | PCYT1B | coding-synon | Subset1 | S2-13    | 22   | 9    | 40.9 |
| chrX | 24597532  | C | T | PCYT1B | coding-synon | Subset1 | S2-4     | 641  | 22   | 3.4  |
| chrX | 24597532  | C | T | PCYT1B | coding-synon | Subset1 | S2-8     | 493  | 62   | 12.5 |
| chr1 | 162725140 | A | G | DDR2   | intron       | Subset3 | BN-12    | 64   | 10   | 15.6 |

|       |           |   |   |        |          |         |          |     |     |      |
|-------|-----------|---|---|--------|----------|---------|----------|-----|-----|------|
| chr1  | 162725140 | A | G | DDR2   | intron   | Subset3 | S3-2     | 84  | 2   | 2.3  |
| chr1  | 162725140 | A | G | DDR2   | intron   | Subset3 | S3-13    | 229 | 3   | 1.3  |
| chr1  | 162725140 | A | G | DDR2   | intron   | Subset3 | BN-3     | 17  | 3   | 17.6 |
| chr1  | 162725140 | A | G | DDR2   | intron   | Subset3 | BN-15    | 16  | 11  | 68.7 |
| chr1  | 162725140 | A | G | DDR2   | intron   | Subset3 | BNM-1    | 8   | 5   | 62.5 |
| chr1  | 162725140 | A | G | DDR2   | intron   | Subset3 | BNM-2    | 20  | 3   | 15   |
| chr1  | 162725140 | A | G | DDR2   | intron   | Subset3 | BNM-3    | 27  | 5   | 18.5 |
| chrX  | 140926199 | C | A | MAGEC3 | missense | Subset1 | MeD-2    | 121 | 4   | 3.3  |
| chrX  | 140926199 | C | A | MAGEC3 | missense | Subset1 | MeD-7    | 159 | 4   | 2.5  |
| chrX  | 140969602 | A | G | MAGEC3 | intron   | Subset3 | MeD-2    | 68  | 5   | 7.3  |
| chrX  | 140969602 | A | G | MAGEC3 | intron   | Subset3 | MeD-7    | 138 | 9   | 6.5  |
| chrX  | 140969602 | A | G | MAGEC3 | intron   | Subset3 | BN-3     | 197 | 3   | 1.5  |
| chr11 | 111338407 | C | A | BTG4   | splice-3 | Subset2 | BN-1     | 227 | 227 | 100  |
| chr11 | 111338407 | C | A | BTG4   | splice-3 | Subset2 | BN-13    | 400 | 43  | 10.7 |
| chr11 | 111338407 | C | A | BTG4   | splice-3 | Subset2 | BN-12    | 99  | 2   | 2    |
| chr11 | 111338407 | C | A | BTG4   | splice-3 | Subset2 | BN-5     | 155 | 11  | 7    |
| chr11 | 111338407 | C | A | BTG4   | splice-3 | Subset2 | BNM-2    | 29  | 5   | 17.2 |
| chr11 | 111338407 | C | A | BTG4   | splice-3 | Subset2 | BNM-3    | 40  | 10  | 25   |
| chr17 | 33585881  | A | G | SLFN5  | missense | Subset2 | BN-10    | 126 | 40  | 31.7 |
| chr17 | 33585881  | A | G | SLFN5  | missense | Subset2 | BN-3     | 91  | 3   | 3.2  |
| chr17 | 33585881  | A | G | SLFN5  | missense | Subset2 | BN-5     | 225 | 33  | 14.6 |
| chr17 | 33585881  | A | G | SLFN5  | missense | Subset2 | BN-11    | 181 | 155 | 85.6 |
| chr17 | 33585881  | A | G | SLFN5  | missense | Subset2 | BNM-1    | 22  | 6   | 27.2 |
| chr17 | 33585881  | A | G | SLFN5  | missense | Subset2 | BNM-2    | 65  | 7   | 10.7 |
| chr17 | 33585881  | A | G | SLFN5  | missense | Subset2 | BNM-3    | 44  | 3   | 6.8  |
| chr8  | 24167395  | G | A | ADAM28 | intron   | Subset2 | BN-13    | 684 | 16  | 2.3  |
| chr8  | 24167395  | G | A | ADAM28 | intron   | Subset2 | BN-12    | 39  | 4   | 10.2 |
| chr8  | 24167395  | G | A | ADAM28 | intron   | Subset2 | BN-11    | 57  | 7   | 12.2 |
| chr8  | 24167395  | G | A | ADAM28 | intron   | Subset2 | BN-15    | 26  | 11  | 42.3 |
| chr8  | 24167395  | G | A | ADAM28 | intron   | Subset2 | BNM-1    | 41  | 9   | 21.9 |
| chr8  | 24167395  | G | A | ADAM28 | intron   | Subset2 | BNM-2    | 106 | 9   | 8.4  |
| chr8  | 24167395  | G | A | ADAM28 | intron   | Subset2 | BNM-3    | 124 | 24  | 19.3 |
| chr1  | 38397587  | C | T | INPP5B | missense | Subset1 | MeC-2    | 31  | 19  | 61.2 |
| chr1  | 38397587  | C | T | INPP5B | missense | Subset1 | MeP-2    | 101 | 3   | 2.9  |
| chr1  | 38397587  | C | T | INPP5B | missense | Subset1 | MeC-3    | 148 | 90  | 60.8 |
| chr1  | 38397587  | C | T | INPP5B | missense | Subset1 | MeC-4    | 279 | 96  | 34.4 |
| chr1  | 38397587  | C | T | INPP5B | missense | Subset1 | MeC-5    | 188 | 39  | 20.7 |
| chr1  | 38397587  | C | T | INPP5B | missense | Subset1 | MeP-4    | 325 | 301 | 92.6 |
| chr1  | 38397587  | C | T | INPP5B | missense | Subset1 | MeP-5    | 308 | 10  | 3.2  |
| chr1  | 38397587  | C | T | INPP5B | missense | Subset1 | MeP-6    | 77  | 14  | 18.1 |
| chr1  | 38397587  | C | T | INPP5B | missense | Subset1 | DCIS-3   | 76  | 2   | 2.6  |
| chr1  | 38397587  | C | T | INPP5B | missense | Subset1 | DCIS-6   | 245 | 229 | 93.4 |
| chr1  | 38397587  | C | T | INPP5B | missense | Subset1 | DCIS-8   | 48  | 11  | 22.9 |
| chr1  | 38397587  | C | T | INPP5B | missense | Subset1 | InvF-12  | 17  | 17  | 100  |
| chr1  | 38397587  | C | T | INPP5B | missense | Subset1 | InvF-9   | 18  | 13  | 72.2 |
| chr1  | 38397587  | C | T | INPP5B | missense | Subset1 | MeD-7    | 136 | 20  | 14.7 |
| chr1  | 38397587  | C | T | INPP5B | missense | Subset1 | MeD-8    | 17  | 2   | 11.7 |
| chr1  | 38397587  | C | T | INPP5B | missense | Subset1 | MeD-9    | 29  | 11  | 37.9 |
| chr1  | 38397587  | C | T | INPP5B | missense | Subset1 | M-DCIS-8 | 50  | 6   | 12   |
| chr1  | 38397587  | C | T | INPP5B | missense | Subset1 | M-DCIS-2 | 76  | 3   | 3.9  |
| chr1  | 38397587  | C | T | INPP5B | missense | Subset1 | M-DCIS-3 | 29  | 24  | 82.7 |
| chr1  | 38397587  | C | T | INPP5B | missense | Subset1 | S1-11    | 82  | 32  | 39   |
| chr1  | 38397587  | C | T | INPP5B | missense | Subset1 | S3-13    | 62  | 3   | 4.8  |
| chr1  | 38397587  | C | T | INPP5B | missense | Subset1 | S3-7     | 7   | 3   | 42.8 |
| chr1  | 38397587  | C | T | INPP5B | missense | Subset1 | S1-1     | 16  | 9   | 56.2 |

|      |           |   |   |         |          |         |          |     |     |      |
|------|-----------|---|---|---------|----------|---------|----------|-----|-----|------|
| chr1 | 38397587  | C | T | INPP5B  | missense | Subset1 | S2-2     | 33  | 17  | 51.5 |
| chr1 | 164953186 | C | T | .       | .        | Subset1 | MeC-2    | 111 | 47  | 42.3 |
| chr1 | 164953186 | C | T | .       | .        | Subset1 | MeP-2    | 240 | 8   | 3.3  |
| chr1 | 164953186 | C | T | .       | .        | Subset1 | MeC-1    | 59  | 58  | 98.3 |
| chr1 | 164953186 | C | T | .       | .        | Subset1 | MeC-3    | 119 | 59  | 49.5 |
| chr1 | 164953186 | C | T | .       | .        | Subset1 | MeC-4    | 127 | 19  | 14.9 |
| chr1 | 164953186 | C | T | .       | .        | Subset1 | MeC-5    | 253 | 3   | 1.1  |
| chr1 | 164953186 | C | T | .       | .        | Subset1 | MeC-8    | 116 | 5   | 4.3  |
| chr1 | 164953186 | C | T | .       | .        | Subset1 | MeP-1    | 29  | 2   | 6.8  |
| chr1 | 164953186 | C | T | .       | .        | Subset1 | MeP-18   | 9   | 3   | 33.3 |
| chr1 | 164953186 | C | T | .       | .        | Subset1 | MeP-12   | 58  | 6   | 10.3 |
| chr1 | 164953186 | C | T | .       | .        | Subset1 | MeP-4    | 273 | 148 | 54.2 |
| chr1 | 164953186 | C | T | .       | .        | Subset1 | MeP-5    | 34  | 3   | 8.8  |
| chr1 | 164953186 | C | T | .       | .        | Subset1 | MeP-6    | 131 | 21  | 16   |
| chr1 | 164953186 | C | T | .       | .        | Subset1 | DCIS-1   | 108 | 17  | 15.7 |
| chr1 | 164953186 | C | T | .       | .        | Subset1 | DCIS-6   | 28  | 3   | 10.7 |
| chr1 | 164953186 | C | T | .       | .        | Subset1 | DCIS-8   | 68  | 3   | 4.4  |
| chr1 | 164953186 | C | T | .       | .        | Subset1 | InvF-1   | 488 | 35  | 7.1  |
| chr1 | 164953186 | C | T | .       | .        | Subset1 | InvF-11  | 74  | 7   | 9.4  |
| chr1 | 164953186 | C | T | .       | .        | Subset1 | InvF-13  | 13  | 6   | 46.1 |
| chr1 | 164953186 | C | T | .       | .        | Subset1 | InvF-9   | 449 | 43  | 9.5  |
| chr1 | 164953186 | C | T | .       | .        | Subset1 | MeD-2    | 136 | 35  | 25.7 |
| chr1 | 164953186 | C | T | .       | .        | Subset1 | MeD-4    | 67  | 2   | 2.9  |
| chr1 | 164953186 | C | T | .       | .        | Subset1 | MeD-7    | 352 | 78  | 22.1 |
| chr1 | 164953186 | C | T | .       | .        | Subset1 | MeD-8    | 66  | 12  | 18.1 |
| chr1 | 164953186 | C | T | .       | .        | Subset1 | MeD-9    | 240 | 27  | 11.2 |
| chr1 | 164953186 | C | T | .       | .        | Subset1 | M-DCIS-2 | 96  | 11  | 11.4 |
| chr1 | 164953186 | C | T | .       | .        | Subset1 | S1-11    | 186 | 29  | 15.5 |
| chr1 | 164953186 | C | T | .       | .        | Subset1 | S3-1     | 90  | 2   | 2.2  |
| chr1 | 164953186 | C | T | .       | .        | Subset1 | S3-13    | 120 | 6   | 5    |
| chr1 | 164953186 | C | T | .       | .        | Subset1 | S3-3     | 228 | 35  | 15.3 |
| chr1 | 164953186 | C | T | .       | .        | Subset1 | S3-7     | 171 | 96  | 56.1 |
| chr1 | 164953186 | C | T | .       | .        | Subset1 | S2-5     | 196 | 3   | 1.5  |
| chr4 | 109683896 | G | T | AGXT2L1 | intron   | Subset1 | MeC-2    | 89  | 58  | 65.1 |
| chr4 | 109683896 | G | T | AGXT2L1 | intron   | Subset1 | MeP-2    | 383 | 58  | 15.1 |
| chr4 | 109683896 | G | T | AGXT2L1 | intron   | Subset1 | MeC-10   | 5   | 3   | 60   |
| chr4 | 109683896 | G | T | AGXT2L1 | intron   | Subset1 | MeC-3    | 50  | 22  | 44   |
| chr4 | 109683896 | G | T | AGXT2L1 | intron   | Subset1 | MeC-4    | 29  | 8   | 27.5 |
| chr4 | 109683896 | G | T | AGXT2L1 | intron   | Subset1 | MeC-8    | 6   | 2   | 33.3 |
| chr4 | 109683896 | G | T | AGXT2L1 | intron   | Subset1 | MeP-18   | 9   | 6   | 66.6 |
| chr4 | 109683896 | G | T | AGXT2L1 | intron   | Subset1 | MeP-4    | 10  | 4   | 40   |
| chr4 | 109683896 | G | T | AGXT2L1 | intron   | Subset1 | MeP-6    | 70  | 13  | 18.5 |
| chr4 | 109683896 | G | T | AGXT2L1 | intron   | Subset1 | DCIS-2   | 29  | 10  | 34.4 |
| chr4 | 109683896 | G | T | AGXT2L1 | intron   | Subset1 | DCIS-3   | 50  | 21  | 42   |
| chr4 | 109683896 | G | T | AGXT2L1 | intron   | Subset1 | DCIS-6   | 17  | 4   | 23.5 |
| chr4 | 109683896 | G | T | AGXT2L1 | intron   | Subset1 | DCIS-8   | 43  | 6   | 13.9 |
| chr4 | 109683896 | G | T | AGXT2L1 | intron   | Subset1 | InvF-10  | 37  | 20  | 54   |
| chr4 | 109683896 | G | T | AGXT2L1 | intron   | Subset1 | InvF-4   | 27  | 21  | 77.7 |
| chr4 | 109683896 | G | T | AGXT2L1 | intron   | Subset1 | InvF-5   | 92  | 2   | 2.1  |
| chr4 | 109683896 | G | T | AGXT2L1 | intron   | Subset1 | InvF-1   | 46  | 38  | 82.6 |
| chr4 | 109683896 | G | T | AGXT2L1 | intron   | Subset1 | InvF-13  | 69  | 66  | 95.6 |
| chr4 | 109683896 | G | T | AGXT2L1 | intron   | Subset1 | InvF-9   | 124 | 121 | 97.5 |
| chr4 | 109683896 | G | T | AGXT2L1 | intron   | Subset1 | MeD-2    | 79  | 6   | 7.5  |
| chr4 | 109683896 | G | T | AGXT2L1 | intron   | Subset1 | MeD-4    | 95  | 4   | 4.2  |
| chr4 | 109683896 | G | T | AGXT2L1 | intron   | Subset1 | MeD-7    | 172 | 51  | 29.6 |



|       |           |   |   |         |          |         |          |     |     |      |
|-------|-----------|---|---|---------|----------|---------|----------|-----|-----|------|
| chr4  | 109683896 | G | T | AGXT2L1 | intron   | Subset1 | MeD-8    | 105 | 60  | 57.1 |
| chr4  | 109683896 | G | T | AGXT2L1 | intron   | Subset1 | MeD-9    | 94  | 57  | 60.6 |
| chr4  | 109683896 | G | T | AGXT2L1 | intron   | Subset1 | M-DCIS-1 | 184 | 2   | 1    |
| chr4  | 109683896 | G | T | AGXT2L1 | intron   | Subset1 | M-DCIS-3 | 202 | 6   | 2.9  |
| chr4  | 109683896 | G | T | AGXT2L1 | intron   | Subset1 | M-DCIS-5 | 47  | 3   | 6.3  |
| chr4  | 109683896 | G | T | AGXT2L1 | intron   | Subset1 | S1-11    | 208 | 85  | 40.8 |
| chr4  | 109683896 | G | T | AGXT2L1 | intron   | Subset1 | S3-2     | 33  | 24  | 72.7 |
| chr4  | 109683896 | G | T | AGXT2L1 | intron   | Subset1 | S3-13    | 8   | 6   | 75   |
| chr4  | 109683896 | G | T | AGXT2L1 | intron   | Subset1 | S3-7     | 20  | 14  | 70   |
| chr4  | 109683896 | G | T | AGXT2L1 | intron   | Subset1 | S1-6     | 84  | 2   | 2.3  |
| chr4  | 109683896 | G | T | AGXT2L1 | intron   | Subset1 | S1-9     | 14  | 2   | 14.2 |
| chr4  | 109683896 | G | T | AGXT2L1 | intron   | Subset1 | S2-13    | 55  | 46  | 83.6 |
| chr4  | 109683896 | G | T | AGXT2L1 | intron   | Subset1 | S2-7     | 32  | 2   | 6.2  |
| chr19 | 45917240  | G | A | ERCC1   | missense | Subset2 | BN-12    | 107 | 29  | 27.1 |
| chr19 | 45917240  | G | A | ERCC1   | missense | Subset2 | BN-3     | 78  | 12  | 15.3 |
| chr11 | 60885566  | C | T | CD5     | intron   | Subset1 | MeC-2    | 326 | 230 | 70.5 |
| chr11 | 60885566  | C | T | CD5     | intron   | Subset1 | MeP-2    | 99  | 44  | 44.4 |
| chr11 | 60885566  | C | T | CD5     | intron   | Subset1 | MeC-10   | 66  | 41  | 62.1 |
| chr11 | 60885566  | C | T | CD5     | intron   | Subset1 | MeC-11   | 107 | 38  | 35.5 |
| chr11 | 60885566  | C | T | CD5     | intron   | Subset1 | MeC-3    | 100 | 9   | 9    |
| chr11 | 60885566  | C | T | CD5     | intron   | Subset1 | MeC-4    | 154 | 33  | 21.4 |
| chr11 | 60885566  | C | T | CD5     | intron   | Subset1 | MeC-5    | 54  | 5   | 9.2  |
| chr11 | 60885566  | C | T | CD5     | intron   | Subset1 | MeP-1    | 80  | 2   | 2.5  |
| chr11 | 60885566  | C | T | CD5     | intron   | Subset1 | MeP-18   | 21  | 20  | 95.2 |
| chr11 | 60885566  | C | T | CD5     | intron   | Subset1 | MeP-4    | 118 | 58  | 49.1 |
| chr11 | 60885566  | C | T | CD5     | intron   | Subset1 | MeP-5    | 163 | 17  | 10.4 |
| chr11 | 60885566  | C | T | CD5     | intron   | Subset1 | MeP-6    | 94  | 46  | 48.9 |
| chr11 | 60885566  | C | T | CD5     | intron   | Subset1 | DCIS-1   | 83  | 3   | 3.6  |
| chr11 | 60885566  | C | T | CD5     | intron   | Subset1 | DCIS-3   | 54  | 11  | 20.3 |
| chr11 | 60885566  | C | T | CD5     | intron   | Subset1 | DCIS-8   | 64  | 8   | 12.5 |
| chr11 | 60885566  | C | T | CD5     | intron   | Subset1 | MeD-2    | 21  | 2   | 9.5  |
| chr11 | 60885566  | C | T | CD5     | intron   | Subset1 | MeD-7    | 122 | 3   | 2.4  |
| chr11 | 60885566  | C | T | CD5     | intron   | Subset1 | MeD-8    | 19  | 3   | 15.7 |
| chr11 | 60885566  | C | T | CD5     | intron   | Subset1 | MeD-9    | 44  | 6   | 13.6 |
| chr11 | 60885566  | C | T | CD5     | intron   | Subset1 | M-DCIS-8 | 40  | 10  | 25   |
| chr11 | 60885566  | C | T | CD5     | intron   | Subset1 | M-DCIS-2 | 387 | 162 | 41.8 |
| chr11 | 60885566  | C | T | CD5     | intron   | Subset1 | S1-11    | 31  | 11  | 35.4 |
| chr11 | 60885566  | C | T | CD5     | intron   | Subset1 | S3-2     | 12  | 6   | 50   |
| chr11 | 60885566  | C | T | CD5     | intron   | Subset1 | S3-3     | 99  | 11  | 11.1 |
| chr11 | 60885566  | C | T | CD5     | intron   | Subset1 | S3-7     | 19  | 19  | 100  |
| chr11 | 60885566  | C | T | CD5     | intron   | Subset1 | S1-1     | 54  | 4   | 7.4  |
| chr11 | 60885566  | C | T | CD5     | intron   | Subset1 | S1-2     | 39  | 11  | 28.2 |
| chr11 | 60885566  | C | T | CD5     | intron   | Subset1 | S2-14    | 83  | 22  | 26.5 |
| chr11 | 60885566  | C | T | CD5     | intron   | Subset1 | S2-4     | 101 | 5   | 4.9  |
| chr3  | 51675937  | T | G | RAD54L2 | intron   | Subset1 | MeC-2    | 255 | 119 | 46.6 |
| chr3  | 51675937  | T | G | RAD54L2 | intron   | Subset1 | MeP-2    | 179 | 23  | 12.8 |
| chr3  | 51675937  | T | G | RAD54L2 | intron   | Subset1 | MeC-10   | 9   | 2   | 22.2 |
| chr3  | 51675937  | T | G | RAD54L2 | intron   | Subset1 | MeC-3    | 310 | 79  | 25.4 |
| chr3  | 51675937  | T | G | RAD54L2 | intron   | Subset1 | MeC-4    | 148 | 23  | 15.5 |
| chr3  | 51675937  | T | G | RAD54L2 | intron   | Subset1 | MeC-8    | 178 | 8   | 4.4  |
| chr3  | 51675937  | T | G | RAD54L2 | intron   | Subset1 | MeP-18   | 29  | 29  | 100  |
| chr3  | 51675937  | T | G | RAD54L2 | intron   | Subset1 | MeP-4    | 298 | 33  | 11   |
| chr3  | 51675937  | T | G | RAD54L2 | intron   | Subset1 | MeP-6    | 80  | 38  | 47.5 |
| chr3  | 51675937  | T | G | RAD54L2 | intron   | Subset1 | DCIS-1   | 122 | 13  | 10.6 |
| chr3  | 51675937  | T | G | RAD54L2 | intron   | Subset1 | DCIS-3   | 129 | 3   | 2.3  |

|       |           |   |   |         |          |         |          |     |     |      |
|-------|-----------|---|---|---------|----------|---------|----------|-----|-----|------|
| chr3  | 51675937  | T | G | RAD54L2 | intron   | Subset1 | DCIS-5   | 4   | 2   | 50   |
| chr3  | 51675937  | T | G | RAD54L2 | intron   | Subset1 | DCIS-6   | 212 | 20  | 9.4  |
| chr3  | 51675937  | T | G | RAD54L2 | intron   | Subset1 | DCIS-8   | 87  | 8   | 9.1  |
| chr3  | 51675937  | T | G | RAD54L2 | intron   | Subset1 | InvF-10  | 18  | 5   | 27.7 |
| chr3  | 51675937  | T | G | RAD54L2 | intron   | Subset1 | InvF-4   | 4   | 3   | 75   |
| chr3  | 51675937  | T | G | RAD54L2 | intron   | Subset1 | InvF-1   | 152 | 10  | 6.5  |
| chr3  | 51675937  | T | G | RAD54L2 | intron   | Subset1 | InvF-12  | 27  | 9   | 33.3 |
| chr3  | 51675937  | T | G | RAD54L2 | intron   | Subset1 | InvF-9   | 61  | 30  | 49.1 |
| chr3  | 51675937  | T | G | RAD54L2 | intron   | Subset1 | MeD-2    | 138 | 6   | 4.3  |
| chr3  | 51675937  | T | G | RAD54L2 | intron   | Subset1 | MeD-7    | 415 | 48  | 11.5 |
| chr3  | 51675937  | T | G | RAD54L2 | intron   | Subset1 | MeD-8    | 140 | 52  | 37.1 |
| chr3  | 51675937  | T | G | RAD54L2 | intron   | Subset1 | MeD-9    | 113 | 37  | 32.7 |
| chr3  | 51675937  | T | G | RAD54L2 | intron   | Subset1 | M-DCIS-8 | 138 | 2   | 1.4  |
| chr3  | 51675937  | T | G | RAD54L2 | intron   | Subset1 | M-DCIS-2 | 192 | 7   | 3.6  |
| chr3  | 51675937  | T | G | RAD54L2 | intron   | Subset1 | M-DCIS-5 | 51  | 2   | 3.9  |
| chr3  | 51675937  | T | G | RAD54L2 | intron   | Subset1 | S1-11    | 443 | 109 | 24.6 |
| chr3  | 51675937  | T | G | RAD54L2 | intron   | Subset1 | S3-13    | 90  | 7   | 7.7  |
| chr3  | 51675937  | T | G | RAD54L2 | intron   | Subset1 | S3-3     | 83  | 2   | 2.4  |
| chr3  | 51675937  | T | G | RAD54L2 | intron   | Subset1 | S3-7     | 218 | 213 | 97.7 |
| chr3  | 51675937  | T | G | RAD54L2 | intron   | Subset1 | S2-10    | 172 | 7   | 4    |
| chr3  | 51675937  | T | G | RAD54L2 | intron   | Subset1 | S2-4     | 232 | 18  | 7.7  |
| chr11 | 125299770 | G | A | PKNOX2  | intron   | Subset1 | MeC-2    | 54  | 30  | 55.5 |
| chr11 | 125299770 | G | A | PKNOX2  | intron   | Subset1 | MeC-10   | 4   | 4   | 100  |
| chr11 | 125299770 | G | A | PKNOX2  | intron   | Subset1 | MeC-3    | 249 | 9   | 3.6  |
| chr11 | 125299770 | G | A | PKNOX2  | intron   | Subset1 | MeC-4    | 185 | 92  | 49.7 |
| chr11 | 125299770 | G | A | PKNOX2  | intron   | Subset1 | MeC-8    | 27  | 26  | 96.2 |
| chr11 | 125299770 | G | A | PKNOX2  | intron   | Subset1 | MeP-4    | 88  | 16  | 18.1 |
| chr11 | 125299770 | G | A | PKNOX2  | intron   | Subset1 | MeP-5    | 107 | 2   | 1.8  |
| chr11 | 125299770 | G | A | PKNOX2  | intron   | Subset1 | MeP-6    | 29  | 7   | 24.1 |
| chr11 | 125299770 | G | A | PKNOX2  | intron   | Subset1 | DCIS-5   | 4   | 2   | 50   |
| chr11 | 125299770 | G | A | PKNOX2  | intron   | Subset1 | DCIS-6   | 43  | 16  | 37.2 |
| chr11 | 125299770 | G | A | PKNOX2  | intron   | Subset1 | InvF-1   | 38  | 6   | 15.7 |
| chr11 | 125299770 | G | A | PKNOX2  | intron   | Subset1 | InvF-9   | 99  | 88  | 88.8 |
| chr11 | 125299770 | G | A | PKNOX2  | intron   | Subset1 | MeD-2    | 43  | 2   | 4.6  |
| chr11 | 125299770 | G | A | PKNOX2  | intron   | Subset1 | MeD-7    | 292 | 12  | 4.1  |
| chr11 | 125299770 | G | A | PKNOX2  | intron   | Subset1 | MeD-8    | 85  | 6   | 7    |
| chr11 | 125299770 | G | A | PKNOX2  | intron   | Subset1 | MeD-9    | 57  | 19  | 33.3 |
| chr11 | 125299770 | G | A | PKNOX2  | intron   | Subset1 | M-DCIS-8 | 165 | 2   | 1.2  |
| chr11 | 125299770 | G | A | PKNOX2  | intron   | Subset1 | S1-11    | 27  | 8   | 29.6 |
| chr11 | 125299770 | G | A | PKNOX2  | intron   | Subset1 | S3-3     | 47  | 24  | 51   |
| chr11 | 125299770 | G | A | PKNOX2  | intron   | Subset1 | S3-7     | 190 | 26  | 13.6 |
| chr11 | 125299770 | G | A | PKNOX2  | intron   | Subset1 | S1-2     | 11  | 6   | 54.5 |
| chr11 | 125299770 | G | A | PKNOX2  | intron   | Subset1 | S2-14    | 139 | 3   | 2.1  |
| chr5  | 141052174 | C | T | ARAP3   | missense | Subset2 | BN-1     | 48  | 29  | 60.4 |
| chr5  | 141052174 | C | T | ARAP3   | missense | Subset2 | BN-3     | 232 | 4   | 1.7  |
| chr5  | 141052174 | C | T | ARAP3   | missense | Subset2 | BN-4     | 21  | 2   | 9.5  |
| chr5  | 141052174 | C | T | ARAP3   | missense | Subset2 | BN-5     | 59  | 2   | 3.3  |
| chr5  | 141052174 | C | T | ARAP3   | missense | Subset2 | BN-15    | 62  | 34  | 54.8 |
| chr5  | 141052174 | C | T | ARAP3   | missense | Subset2 | BNM-3    | 35  | 14  | 40   |
| chrX  | 11197553  | C | T | ARHGAP6 | missense | Subset1 | MeC-2    | 133 | 8   | 6    |
| chrX  | 11197553  | C | T | ARHGAP6 | missense | Subset1 | MeP-2    | 171 | 6   | 3.5  |
| chrX  | 11197553  | C | T | ARHGAP6 | missense | Subset1 | MeC-3    | 158 | 65  | 41.1 |
| chrX  | 11197553  | C | T | ARHGAP6 | missense | Subset1 | MeC-4    | 47  | 11  | 23.4 |
| chrX  | 11197553  | C | T | ARHGAP6 | missense | Subset1 | MeC-5    | 5   | 2   | 40   |
| chrX  | 11197553  | C | T | ARHGAP6 | missense | Subset1 | MeC-8    | 35  | 8   | 22.8 |

|       |           |   |   |         |          |         |          |     |     |      |
|-------|-----------|---|---|---------|----------|---------|----------|-----|-----|------|
| chrX  | 11197553  | C | T | ARHGAP6 | missense | Subset1 | MeP-1    | 15  | 3   | 20   |
| chrX  | 11197553  | C | T | ARHGAP6 | missense | Subset1 | MeP-12   | 66  | 2   | 3    |
| chrX  | 11197553  | C | T | ARHGAP6 | missense | Subset1 | MeP-4    | 160 | 34  | 21.2 |
| chrX  | 11197553  | C | T | ARHGAP6 | missense | Subset1 | MeP-6    | 222 | 43  | 19.3 |
| chrX  | 11197553  | C | T | ARHGAP6 | missense | Subset1 | DCIS-1   | 102 | 31  | 30.3 |
| chrX  | 11197553  | C | T | ARHGAP6 | missense | Subset1 | DCIS-3   | 19  | 4   | 21   |
| chrX  | 11197553  | C | T | ARHGAP6 | missense | Subset1 | DCIS-6   | 34  | 3   | 8.8  |
| chrX  | 11197553  | C | T | ARHGAP6 | missense | Subset1 | DCIS-8   | 50  | 4   | 8    |
| chrX  | 11197553  | C | T | ARHGAP6 | missense | Subset1 | MeD-2    | 86  | 26  | 30.2 |
| chrX  | 11197553  | C | T | ARHGAP6 | missense | Subset1 | MeD-4    | 91  | 4   | 4.3  |
| chrX  | 11197553  | C | T | ARHGAP6 | missense | Subset1 | MeD-7    | 182 | 17  | 9.3  |
| chrX  | 11197553  | C | T | ARHGAP6 | missense | Subset1 | MeD-8    | 88  | 38  | 43.1 |
| chrX  | 11197553  | C | T | ARHGAP6 | missense | Subset1 | MeD-9    | 70  | 32  | 45.7 |
| chrX  | 11197553  | C | T | ARHGAP6 | missense | Subset1 | M-DCIS-2 | 61  | 4   | 6.5  |
| chrX  | 11197553  | C | T | ARHGAP6 | missense | Subset1 | M-DCIS-4 | 197 | 2   | 1    |
| chrX  | 11197553  | C | T | ARHGAP6 | missense | Subset1 | M-DCIS-5 | 56  | 4   | 7.1  |
| chrX  | 11197553  | C | T | ARHGAP6 | missense | Subset1 | S1-11    | 166 | 74  | 44.5 |
| chrX  | 11197553  | C | T | ARHGAP6 | missense | Subset1 | S3-1     | 76  | 13  | 17.1 |
| chrX  | 11197553  | C | T | ARHGAP6 | missense | Subset1 | S3-13    | 412 | 30  | 7.2  |
| chrX  | 11197553  | C | T | ARHGAP6 | missense | Subset1 | S3-3     | 562 | 119 | 21.1 |
| chrX  | 11197553  | C | T | ARHGAP6 | missense | Subset1 | S3-7     | 762 | 11  | 1.4  |
| chrX  | 11197553  | C | T | ARHGAP6 | missense | Subset1 | S1-6     | 101 | 45  | 44.5 |
| chrX  | 11197553  | C | T | ARHGAP6 | missense | Subset1 | S2-14    | 70  | 35  | 50   |
| chr12 | 51386791  | C | T | SLC11A2 | intron   | Subset2 | BN-12    | 129 | 4   | 3.1  |
| chr12 | 51386791  | C | T | SLC11A2 | intron   | Subset2 | BN-8     | 102 | 2   | 1.9  |
| chr12 | 51386791  | C | T | SLC11A2 | intron   | Subset2 | BN-10    | 101 | 6   | 5.9  |
| chr12 | 51386791  | C | T | SLC11A2 | intron   | Subset2 | BN-3     | 6   | 4   | 66.6 |
| chr12 | 51386791  | C | T | SLC11A2 | intron   | Subset2 | BN-4     | 37  | 28  | 75.6 |
| chr12 | 51386791  | C | T | SLC11A2 | intron   | Subset2 | BN-5     | 56  | 10  | 17.8 |
| chr12 | 51386791  | C | T | SLC11A2 | intron   | Subset2 | BN-11    | 40  | 2   | 5    |
| chr12 | 51386791  | C | T | SLC11A2 | intron   | Subset2 | BNM-3    | 7   | 2   | 28.5 |
| chr9  | 119459942 | A | G | TRIM32  | utr-5    | Subset1 | MeC-2    | 130 | 36  | 27.6 |
| chr9  | 119459942 | A | G | TRIM32  | utr-5    | Subset1 | MeC-11   | 7   | 5   | 71.4 |
| chr9  | 119459942 | A | G | TRIM32  | utr-5    | Subset1 | MeC-3    | 137 | 21  | 15.3 |
| chr9  | 119459942 | A | G | TRIM32  | utr-5    | Subset1 | MeC-4    | 86  | 26  | 30.2 |
| chr9  | 119459942 | A | G | TRIM32  | utr-5    | Subset1 | MeP-18   | 3   | 3   | 100  |
| chr9  | 119459942 | A | G | TRIM32  | utr-5    | Subset1 | MeP-4    | 44  | 17  | 38.6 |
| chr9  | 119459942 | A | G | TRIM32  | utr-5    | Subset1 | MeP-6    | 63  | 27  | 42.8 |
| chr9  | 119459942 | A | G | TRIM32  | utr-5    | Subset1 | DCIS-3   | 50  | 2   | 4    |
| chr9  | 119459942 | A | G | TRIM32  | utr-5    | Subset1 | DCIS-6   | 74  | 14  | 18.9 |
| chr9  | 119459942 | A | G | TRIM32  | utr-5    | Subset1 | MeD-2    | 84  | 22  | 26.1 |
| chr9  | 119459942 | A | G | TRIM32  | utr-5    | Subset1 | MeD-4    | 107 | 4   | 3.7  |
| chr9  | 119459942 | A | G | TRIM32  | utr-5    | Subset1 | MeD-7    | 146 | 32  | 21.9 |
| chr9  | 119459942 | A | G | TRIM32  | utr-5    | Subset1 | MeD-8    | 126 | 8   | 6.3  |
| chr9  | 119459942 | A | G | TRIM32  | utr-5    | Subset1 | MeD-9    | 55  | 50  | 90.9 |
| chr9  | 119459942 | A | G | TRIM32  | utr-5    | Subset1 | M-DCIS-5 | 28  | 3   | 10.7 |
| chr9  | 119459942 | A | G | TRIM32  | utr-5    | Subset1 | S1-11    | 115 | 23  | 20   |
| chr9  | 119459942 | A | G | TRIM32  | utr-5    | Subset1 | S3-13    | 21  | 3   | 14.2 |
| chr9  | 119459942 | A | G | TRIM32  | utr-5    | Subset1 | S3-3     | 42  | 3   | 7.1  |
| chr9  | 119459942 | A | G | TRIM32  | utr-5    | Subset1 | S3-7     | 2   | 2   | 100  |
| chr9  | 119459942 | A | G | TRIM32  | utr-5    | Subset1 | S1-2     | 57  | 5   | 8.7  |
| chr9  | 119459942 | A | G | TRIM32  | utr-5    | Subset1 | S2-14    | 100 | 4   | 4    |
| chr9  | 119459942 | A | G | TRIM32  | utr-5    | Subset1 | S2-4     | 160 | 5   | 3.1  |
| chrX  | 51488774  | G | T | GSPT2   | utr-3    | Subset1 | MeC-2    | 80  | 13  | 16.2 |
| chrX  | 51488774  | G | T | GSPT2   | utr-3    | Subset1 | MeP-2    | 163 | 152 | 93.2 |

|       |          |   |   |        |              |         |          |     |     |      |
|-------|----------|---|---|--------|--------------|---------|----------|-----|-----|------|
| chrX  | 51488774 | G | T | GSPT2  | utr-3        | Subset1 | MeC-10   | 10  | 2   | 20   |
| chrX  | 51488774 | G | T | GSPT2  | utr-3        | Subset1 | MeC-3    | 106 | 79  | 74.5 |
| chrX  | 51488774 | G | T | GSPT2  | utr-3        | Subset1 | MeC-4    | 249 | 5   | 2    |
| chrX  | 51488774 | G | T | GSPT2  | utr-3        | Subset1 | MeC-5    | 5   | 3   | 60   |
| chrX  | 51488774 | G | T | GSPT2  | utr-3        | Subset1 | MeP-16   | 199 | 67  | 33.6 |
| chrX  | 51488774 | G | T | GSPT2  | utr-3        | Subset1 | MeP-4    | 58  | 53  | 91.3 |
| chrX  | 51488774 | G | T | GSPT2  | utr-3        | Subset1 | MeP-6    | 58  | 7   | 12   |
| chrX  | 51488774 | G | T | GSPT2  | utr-3        | Subset1 | DCIS-6   | 12  | 3   | 25   |
| chrX  | 51488774 | G | T | GSPT2  | utr-3        | Subset1 | DCIS-8   | 34  | 2   | 5.8  |
| chrX  | 51488774 | G | T | GSPT2  | utr-3        | Subset1 | InvF-13  | 2   | 2   | 100  |
| chrX  | 51488774 | G | T | GSPT2  | utr-3        | Subset1 | InvF-9   | 14  | 8   | 57.1 |
| chrX  | 51488774 | G | T | GSPT2  | utr-3        | Subset1 | MeD-2    | 116 | 16  | 13.7 |
| chrX  | 51488774 | G | T | GSPT2  | utr-3        | Subset1 | MeD-7    | 176 | 43  | 24.4 |
| chrX  | 51488774 | G | T | GSPT2  | utr-3        | Subset1 | MeD-8    | 24  | 23  | 95.8 |
| chrX  | 51488774 | G | T | GSPT2  | utr-3        | Subset1 | MeD-9    | 75  | 29  | 38.6 |
| chrX  | 51488774 | G | T | GSPT2  | utr-3        | Subset1 | M-DCIS-5 | 75  | 4   | 5.3  |
| chrX  | 51488774 | G | T | GSPT2  | utr-3        | Subset1 | S1-11    | 191 | 106 | 55.4 |
| chrX  | 51488774 | G | T | GSPT2  | utr-3        | Subset1 | S3-1     | 122 | 104 | 85.2 |
| chrX  | 51488774 | G | T | GSPT2  | utr-3        | Subset1 | S3-13    | 71  | 15  | 21.1 |
| chrX  | 51488774 | G | T | GSPT2  | utr-3        | Subset1 | S1-12    | 28  | 2   | 7.1  |
| chrX  | 51488774 | G | T | GSPT2  | utr-3        | Subset1 | S2-4     | 199 | 4   | 2    |
| chr20 | 45905326 | G | A | ZMYND8 | coding-synon | Subset1 | MeC-2    | 567 | 97  | 17.1 |
| chr20 | 45905326 | G | A | ZMYND8 | coding-synon | Subset1 | MeP-2    | 179 | 21  | 11.7 |
| chr20 | 45905326 | G | A | ZMYND8 | coding-synon | Subset1 | MeC-1    | 50  | 5   | 10   |
| chr20 | 45905326 | G | A | ZMYND8 | coding-synon | Subset1 | MeC-16   | 2   | 2   | 100  |
| chr20 | 45905326 | G | A | ZMYND8 | coding-synon | Subset1 | MeC-3    | 169 | 56  | 33.1 |
| chr20 | 45905326 | G | A | ZMYND8 | coding-synon | Subset1 | MeC-4    | 256 | 158 | 61.7 |
| chr20 | 45905326 | G | A | ZMYND8 | coding-synon | Subset1 | MeC-8    | 128 | 87  | 67.9 |
| chr20 | 45905326 | G | A | ZMYND8 | coding-synon | Subset1 | MeP-1    | 84  | 4   | 4.7  |
| chr20 | 45905326 | G | A | ZMYND8 | coding-synon | Subset1 | MeP-18   | 578 | 578 | 100  |
| chr20 | 45905326 | G | A | ZMYND8 | coding-synon | Subset1 | MeP-4    | 226 | 55  | 24.3 |
| chr20 | 45905326 | G | A | ZMYND8 | coding-synon | Subset1 | MeP-6    | 480 | 166 | 34.5 |
| chr20 | 45905326 | G | A | ZMYND8 | coding-synon | Subset1 | DCIS-1   | 306 | 4   | 1.3  |
| chr20 | 45905326 | G | A | ZMYND8 | coding-synon | Subset1 | DCIS-2   | 125 | 18  | 14.4 |
| chr20 | 45905326 | G | A | ZMYND8 | coding-synon | Subset1 | DCIS-3   | 295 | 35  | 11.8 |
| chr20 | 45905326 | G | A | ZMYND8 | coding-synon | Subset1 | DCIS-6   | 106 | 26  | 24.5 |
| chr20 | 45905326 | G | A | ZMYND8 | coding-synon | Subset1 | InvF-11  | 286 | 5   | 1.7  |
| chr20 | 45905326 | G | A | ZMYND8 | coding-synon | Subset1 | MeD-2    | 167 | 10  | 5.9  |
| chr20 | 45905326 | G | A | ZMYND8 | coding-synon | Subset1 | MeD-4    | 268 | 4   | 1.4  |
| chr20 | 45905326 | G | A | ZMYND8 | coding-synon | Subset1 | MeD-7    | 303 | 38  | 12.5 |
| chr20 | 45905326 | G | A | ZMYND8 | coding-synon | Subset1 | MeD-8    | 186 | 27  | 14.5 |
| chr20 | 45905326 | G | A | ZMYND8 | coding-synon | Subset1 | MeD-9    | 772 | 261 | 33.8 |
| chr20 | 45905326 | G | A | ZMYND8 | coding-synon | Subset1 | M-DCIS-2 | 307 | 14  | 4.5  |
| chr20 | 45905326 | G | A | ZMYND8 | coding-synon | Subset1 | S1-11    | 502 | 170 | 33.8 |
| chr20 | 45905326 | G | A | ZMYND8 | coding-synon | Subset1 | S3-13    | 184 | 35  | 19   |
| chr20 | 45905326 | G | A | ZMYND8 | coding-synon | Subset1 | S1-12    | 377 | 33  | 8.7  |
| chr20 | 45905326 | G | A | ZMYND8 | coding-synon | Subset1 | S1-9     | 164 | 129 | 78.6 |
| chr20 | 45905326 | G | A | ZMYND8 | coding-synon | Subset1 | S2-2     | 212 | 32  | 15   |
| chr20 | 45905326 | G | A | ZMYND8 | coding-synon | Subset1 | S2-7     | 652 | 615 | 94.3 |
| chr16 | 81303746 | A | G | BCMO1  | intron       | Subset2 | BN-13    | 222 | 83  | 37.3 |
| chr16 | 81303746 | A | G | BCMO1  | intron       | Subset2 | BN-12    | 48  | 37  | 77   |
| chr16 | 81303746 | A | G | BCMO1  | intron       | Subset2 | BN-10    | 797 | 8   | 1    |
| chr16 | 81303746 | A | G | BCMO1  | intron       | Subset2 | BN-3     | 100 | 2   | 2    |
| chr16 | 81303746 | A | G | BCMO1  | intron       | Subset2 | BN-4     | 36  | 10  | 27.7 |
| chr16 | 81303746 | A | G | BCMO1  | intron       | Subset2 | BN-11    | 45  | 5   | 11.1 |

|       |           |   |   |       |        |         |          |      |     |      |
|-------|-----------|---|---|-------|--------|---------|----------|------|-----|------|
| chr16 | 81303746  | A | G | BCMO1 | intron | Subset2 | BN-15    | 148  | 7   | 4.7  |
| chr16 | 81303746  | A | G | BCMO1 | intron | Subset2 | BNM-1    | 61   | 6   | 9.8  |
| chr16 | 81303746  | A | G | BCMO1 | intron | Subset2 | BNM-2    | 65   | 4   | 6.1  |
| chr16 | 81303746  | A | G | BCMO1 | intron | Subset2 | BNM-3    | 32   | 8   | 25   |
| chr10 | 112337693 | T | A | SMC3  | intron | Subset1 | MeC-2    | 24   | 9   | 37.5 |
| chr10 | 112337693 | T | A | SMC3  | intron | Subset1 | MeP-2    | 772  | 481 | 62.3 |
| chr10 | 112337693 | T | A | SMC3  | intron | Subset1 | MeC-3    | 39   | 12  | 30.7 |
| chr10 | 112337693 | T | A | SMC3  | intron | Subset1 | MeC-4    | 27   | 8   | 29.6 |
| chr10 | 112337693 | T | A | SMC3  | intron | Subset1 | MeC-5    | 9    | 5   | 55.5 |
| chr10 | 112337693 | T | A | SMC3  | intron | Subset1 | MeP-4    | 18   | 12  | 66.6 |
| chr10 | 112337693 | T | A | SMC3  | intron | Subset1 | MeP-6    | 28   | 6   | 21.4 |
| chr10 | 112337693 | T | A | SMC3  | intron | Subset1 | DCIS-1   | 27   | 2   | 7.4  |
| chr10 | 112337693 | T | A | SMC3  | intron | Subset1 | DCIS-3   | 13   | 7   | 53.8 |
| chr10 | 112337693 | T | A | SMC3  | intron | Subset1 | DCIS-6   | 30   | 9   | 30   |
| chr10 | 112337693 | T | A | SMC3  | intron | Subset1 | InvF-10  | 212  | 58  | 27.3 |
| chr10 | 112337693 | T | A | SMC3  | intron | Subset1 | InvF-4   | 78   | 16  | 20.5 |
| chr10 | 112337693 | T | A | SMC3  | intron | Subset1 | InvF-5   | 325  | 322 | 99   |
| chr10 | 112337693 | T | A | SMC3  | intron | Subset1 | InvF-1   | 51   | 5   | 9.8  |
| chr10 | 112337693 | T | A | SMC3  | intron | Subset1 | InvF-9   | 21   | 8   | 38   |
| chr10 | 112337693 | T | A | SMC3  | intron | Subset1 | MeD-2    | 122  | 10  | 8.1  |
| chr10 | 112337693 | T | A | SMC3  | intron | Subset1 | MeD-4    | 65   | 2   | 3    |
| chr10 | 112337693 | T | A | SMC3  | intron | Subset1 | MeD-7    | 63   | 13  | 20.6 |
| chr10 | 112337693 | T | A | SMC3  | intron | Subset1 | MeD-8    | 169  | 4   | 2.3  |
| chr10 | 112337693 | T | A | SMC3  | intron | Subset1 | MeD-9    | 39   | 27  | 69.2 |
| chr10 | 112337693 | T | A | SMC3  | intron | Subset1 | S1-11    | 150  | 76  | 50.6 |
| chr10 | 112337693 | T | A | SMC3  | intron | Subset1 | S3-2     | 418  | 85  | 20.3 |
| chr10 | 112337693 | T | A | SMC3  | intron | Subset1 | S1-1     | 19   | 5   | 26.3 |
| chr10 | 112337693 | T | A | SMC3  | intron | Subset1 | S1-2     | 9    | 4   | 44.4 |
| chr17 | 41059362  | C | T | G6PC  | intron | Subset1 | MeC-2    | 397  | 125 | 31.4 |
| chr17 | 41059362  | C | T | G6PC  | intron | Subset1 | MeC-1    | 119  | 2   | 1.6  |
| chr17 | 41059362  | C | T | G6PC  | intron | Subset1 | MeC-3    | 2824 | 247 | 8.7  |
| chr17 | 41059362  | C | T | G6PC  | intron | Subset1 | MeC-4    | 1031 | 425 | 41.2 |
| chr17 | 41059362  | C | T | G6PC  | intron | Subset1 | MeC-8    | 622  | 146 | 23.4 |
| chr17 | 41059362  | C | T | G6PC  | intron | Subset1 | MeP-12   | 121  | 2   | 1.6  |
| chr17 | 41059362  | C | T | G6PC  | intron | Subset1 | MeP-4    | 462  | 277 | 59.9 |
| chr17 | 41059362  | C | T | G6PC  | intron | Subset1 | MeP-6    | 160  | 27  | 16.8 |
| chr17 | 41059362  | C | T | G6PC  | intron | Subset1 | DCIS-1   | 284  | 42  | 14.7 |
| chr17 | 41059362  | C | T | G6PC  | intron | Subset1 | DCIS-2   | 185  | 17  | 9.1  |
| chr17 | 41059362  | C | T | G6PC  | intron | Subset1 | DCIS-8   | 121  | 15  | 12.3 |
| chr17 | 41059362  | C | T | G6PC  | intron | Subset1 | InvF-10  | 16   | 6   | 37.5 |
| chr17 | 41059362  | C | T | G6PC  | intron | Subset1 | InvF-4   | 4    | 2   | 50   |
| chr17 | 41059362  | C | T | G6PC  | intron | Subset1 | InvF-1   | 84   | 3   | 3.5  |
| chr17 | 41059362  | C | T | G6PC  | intron | Subset1 | InvF-11  | 475  | 78  | 16.4 |
| chr17 | 41059362  | C | T | G6PC  | intron | Subset1 | InvF-13  | 47   | 47  | 100  |
| chr17 | 41059362  | C | T | G6PC  | intron | Subset1 | InvF-9   | 330  | 27  | 8.1  |
| chr17 | 41059362  | C | T | G6PC  | intron | Subset1 | MeD-2    | 209  | 40  | 19.1 |
| chr17 | 41059362  | C | T | G6PC  | intron | Subset1 | MeD-4    | 141  | 2   | 1.4  |
| chr17 | 41059362  | C | T | G6PC  | intron | Subset1 | MeD-7    | 330  | 118 | 35.7 |
| chr17 | 41059362  | C | T | G6PC  | intron | Subset1 | MeD-8    | 130  | 8   | 6.1  |
| chr17 | 41059362  | C | T | G6PC  | intron | Subset1 | MeD-9    | 113  | 56  | 49.5 |
| chr17 | 41059362  | C | T | G6PC  | intron | Subset1 | M-DCIS-1 | 119  | 6   | 5    |
| chr17 | 41059362  | C | T | G6PC  | intron | Subset1 | M-DCIS-8 | 218  | 5   | 2.2  |
| chr17 | 41059362  | C | T | G6PC  | intron | Subset1 | S1-11    | 180  | 63  | 35   |
| chr17 | 41059362  | C | T | G6PC  | intron | Subset1 | S3-2     | 7    | 2   | 28.5 |
| chr17 | 41059362  | C | T | G6PC  | intron | Subset1 | S3-13    | 836  | 61  | 7.2  |

|       |          |   |   |         |              |         |          |      |      |      |
|-------|----------|---|---|---------|--------------|---------|----------|------|------|------|
| chr17 | 41059362 | C | T | G6PC    | intron       | Subset1 | S3-7     | 71   | 52   | 73.2 |
| chr17 | 41059362 | C | T | G6PC    | intron       | Subset1 | S1-1     | 1404 | 29   | 2    |
| chr17 | 41059362 | C | T | G6PC    | intron       | Subset1 | S1-2     | 48   | 6    | 12.5 |
| chr2  | 74757492 | T | C | HTRA2   | missense     | Subset1 | MeC-2    | 22   | 3    | 13.6 |
| chr2  | 74757492 | T | C | HTRA2   | missense     | Subset1 | MeC-20   | 10   | 7    | 70   |
| chr2  | 74757492 | T | C | HTRA2   | missense     | Subset1 | MeC-3    | 681  | 223  | 32.7 |
| chr2  | 74757492 | T | C | HTRA2   | missense     | Subset1 | MeC-4    | 146  | 5    | 3.4  |
| chr2  | 74757492 | T | C | HTRA2   | missense     | Subset1 | MeC-5    | 324  | 209  | 64.5 |
| chr2  | 74757492 | T | C | HTRA2   | missense     | Subset1 | MeP-18   | 3    | 3    | 100  |
| chr2  | 74757492 | T | C | HTRA2   | missense     | Subset1 | MeP-4    | 454  | 381  | 83.9 |
| chr2  | 74757492 | T | C | HTRA2   | missense     | Subset1 | MeP-6    | 147  | 11   | 7.4  |
| chr2  | 74757492 | T | C | HTRA2   | missense     | Subset1 | DCIS-3   | 92   | 9    | 9.7  |
| chr2  | 74757492 | T | C | HTRA2   | missense     | Subset1 | DCIS-6   | 20   | 7    | 35   |
| chr2  | 74757492 | T | C | HTRA2   | missense     | Subset1 | DCIS-8   | 23   | 3    | 13   |
| chr2  | 74757492 | T | C | HTRA2   | missense     | Subset1 | InvF-11  | 46   | 2    | 4.3  |
| chr2  | 74757492 | T | C | HTRA2   | missense     | Subset1 | InvF-12  | 160  | 159  | 99.3 |
| chr2  | 74757492 | T | C | HTRA2   | missense     | Subset1 | InvF-13  | 1346 | 1337 | 99.3 |
| chr2  | 74757492 | T | C | HTRA2   | missense     | Subset1 | InvF-9   | 113  | 17   | 15   |
| chr2  | 74757492 | T | C | HTRA2   | missense     | Subset1 | MeD-2    | 30   | 3    | 10   |
| chr2  | 74757492 | T | C | HTRA2   | missense     | Subset1 | MeD-7    | 257  | 97   | 37.7 |
| chr2  | 74757492 | T | C | HTRA2   | missense     | Subset1 | MeD-8    | 23   | 4    | 17.3 |
| chr2  | 74757492 | T | C | HTRA2   | missense     | Subset1 | MeD-9    | 76   | 52   | 68.4 |
| chr2  | 74757492 | T | C | HTRA2   | missense     | Subset1 | M-DCIS-3 | 72   | 72   | 100  |
| chr2  | 74757492 | T | C | HTRA2   | missense     | Subset1 | S1-11    | 19   | 6    | 31.5 |
| chr2  | 74757492 | T | C | HTRA2   | missense     | Subset1 | S3-3     | 85   | 4    | 4.7  |
| chr2  | 74757492 | T | C | HTRA2   | missense     | Subset1 | S3-7     | 6    | 4    | 66.6 |
| chr2  | 74757492 | T | C | HTRA2   | missense     | Subset1 | S2-8     | 268  | 3    | 1.1  |
| chr7  | 6639734  | C | G | C7orf26 | coding-synon | Subset3 | MeP-5    | 25   | 20   | 80   |
| chr7  | 6639734  | C | G | C7orf26 | coding-synon | Subset3 | M-DCIS-1 | 191  | 149  | 78   |
| chr7  | 6639734  | C | G | C7orf26 | coding-synon | Subset3 | M-DCIS-5 | 59   | 2    | 3.3  |
| chr10 | 5200766  | G | A | AKR1CL1 | intron       | Subset1 | MeC-2    | 125  | 13   | 10.4 |
| chr10 | 5200766  | G | A | AKR1CL1 | intron       | Subset1 | MeP-2    | 481  | 261  | 54.2 |
| chr10 | 5200766  | G | A | AKR1CL1 | intron       | Subset1 | MeC-1    | 7    | 3    | 42.8 |
| chr10 | 5200766  | G | A | AKR1CL1 | intron       | Subset1 | MeC-11   | 124  | 123  | 99.1 |
| chr10 | 5200766  | G | A | AKR1CL1 | intron       | Subset1 | MeC-20   | 24   | 24   | 100  |
| chr10 | 5200766  | G | A | AKR1CL1 | intron       | Subset1 | MeC-3    | 153  | 16   | 10.4 |
| chr10 | 5200766  | G | A | AKR1CL1 | intron       | Subset1 | MeC-4    | 81   | 40   | 49.3 |
| chr10 | 5200766  | G | A | AKR1CL1 | intron       | Subset1 | MeP-1    | 224  | 4    | 1.7  |
| chr10 | 5200766  | G | A | AKR1CL1 | intron       | Subset1 | MeP-18   | 10   | 9    | 90   |
| chr10 | 5200766  | G | A | AKR1CL1 | intron       | Subset1 | MeP-12   | 136  | 4    | 2.9  |
| chr10 | 5200766  | G | A | AKR1CL1 | intron       | Subset1 | MeP-4    | 223  | 175  | 78.4 |
| chr10 | 5200766  | G | A | AKR1CL1 | intron       | Subset1 | MeP-6    | 176  | 14   | 7.9  |
| chr10 | 5200766  | G | A | AKR1CL1 | intron       | Subset1 | DCIS-1   | 59   | 7    | 11.8 |
| chr10 | 5200766  | G | A | AKR1CL1 | intron       | Subset1 | DCIS-6   | 88   | 4    | 4.5  |
| chr10 | 5200766  | G | A | AKR1CL1 | intron       | Subset1 | DCIS-8   | 57   | 6    | 10.5 |
| chr10 | 5200766  | G | A | AKR1CL1 | intron       | Subset1 | MeD-2    | 191  | 29   | 15.1 |
| chr10 | 5200766  | G | A | AKR1CL1 | intron       | Subset1 | MeD-4    | 291  | 4    | 1.3  |
| chr10 | 5200766  | G | A | AKR1CL1 | intron       | Subset1 | MeD-7    | 192  | 53   | 27.6 |
| chr10 | 5200766  | G | A | AKR1CL1 | intron       | Subset1 | MeD-8    | 133  | 35   | 26.3 |
| chr10 | 5200766  | G | A | AKR1CL1 | intron       | Subset1 | MeD-9    | 518  | 99   | 19.1 |
| chr10 | 5200766  | G | A | AKR1CL1 | intron       | Subset1 | M-DCIS-8 | 32   | 7    | 21.8 |
| chr10 | 5200766  | G | A | AKR1CL1 | intron       | Subset1 | M-DCIS-2 | 103  | 3    | 2.9  |
| chr10 | 5200766  | G | A | AKR1CL1 | intron       | Subset1 | S1-11    | 328  | 72   | 21.9 |
| chr10 | 5200766  | G | A | AKR1CL1 | intron       | Subset1 | S3-2     | 408  | 108  | 26.4 |
| chr10 | 5200766  | G | A | AKR1CL1 | intron       | Subset1 | S3-13    | 98   | 3    | 3    |

|       |           |   |   |         |          |         |          |     |     |      |
|-------|-----------|---|---|---------|----------|---------|----------|-----|-----|------|
| chr10 | 5200766   | G | A | AKR1CL1 | intron   | Subset1 | S1-1     | 138 | 17  | 12.3 |
| chr10 | 5200766   | G | A | AKR1CL1 | intron   | Subset1 | S1-12    | 56  | 8   | 14.2 |
| chr10 | 5200766   | G | A | AKR1CL1 | intron   | Subset1 | S2-10    | 937 | 884 | 94.3 |
| chr10 | 5200766   | G | A | AKR1CL1 | intron   | Subset1 | S2-13    | 76  | 40  | 52.6 |
| chr10 | 5200766   | G | A | AKR1CL1 | intron   | Subset1 | S2-7     | 73  | 59  | 80.8 |
| chr2  | 63631702  | C | T | WDPCP   | missense | Subset3 | M-DCIS-5 | 148 | 4   | 2.7  |
| chr2  | 63631702  | C | T | WDPCP   | missense | Subset3 | S2-4     | 800 | 8   | 1    |
| chr2  | 63631702  | C | T | WDPCP   | missense | Subset3 | S2-9     | 439 | 135 | 30.7 |
| chr4  | 106157474 | C | A | TET2    | nonsense | Subset3 | S2-9     | 21  | 9   | 42.8 |
| chr9  | 40332891  | G | C | .       | .        | Subset1 | MeC-2    | 10  | 6   | 60   |
| chr9  | 40332891  | G | C | .       | .        | Subset1 | MeP-2    | 273 | 5   | 1.8  |
| chr9  | 40332891  | G | C | .       | .        | Subset1 | MeC-5    | 18  | 3   | 16.6 |
| chr9  | 40332891  | G | C | .       | .        | Subset1 | MeC-8    | 21  | 4   | 19   |
| chr9  | 40332891  | G | C | .       | .        | Subset1 | MeP-4    | 55  | 28  | 50.9 |
| chr9  | 40332891  | G | C | .       | .        | Subset1 | MeP-6    | 17  | 2   | 11.7 |
| chr9  | 40332891  | G | C | .       | .        | Subset1 | DCIS-3   | 170 | 132 | 77.6 |
| chr9  | 40332891  | G | C | .       | .        | Subset1 | DCIS-6   | 18  | 9   | 50   |
| chr9  | 40332891  | G | C | .       | .        | Subset1 | DCIS-8   | 11  | 2   | 18.1 |
| chr9  | 40332891  | G | C | .       | .        | Subset1 | MeD-2    | 78  | 12  | 15.3 |
| chr9  | 40332891  | G | C | .       | .        | Subset1 | MeD-8    | 133 | 107 | 80.4 |
| chr9  | 40332891  | G | C | .       | .        | Subset1 | MeD-9    | 58  | 44  | 75.8 |
| chr9  | 40332891  | G | C | .       | .        | Subset1 | M-DCIS-2 | 58  | 34  | 58.6 |
| chr9  | 40332891  | G | C | .       | .        | Subset1 | S1-11    | 159 | 24  | 15   |
| chr9  | 40332891  | G | C | .       | .        | Subset1 | S3-13    | 34  | 2   | 5.8  |
| chr9  | 40332891  | G | C | .       | .        | Subset1 | S3-7     | 45  | 17  | 37.7 |
| chr9  | 40332891  | G | C | .       | .        | Subset1 | S1-2     | 31  | 3   | 9.6  |
| chr9  | 40332891  | G | C | .       | .        | Subset1 | S2-14    | 24  | 5   | 20.8 |
| chr9  | 40332891  | G | C | .       | .        | Subset1 | S2-13    | 18  | 12  | 66.6 |
| chr14 | 23866253  | C | T | MYH6    | missense | Subset1 | MeC-2    | 166 | 102 | 61.4 |
| chr14 | 23866253  | C | T | MYH6    | missense | Subset1 | MeP-2    | 6   | 3   | 50   |
| chr14 | 23866253  | C | T | MYH6    | missense | Subset1 | MeC-3    | 192 | 180 | 93.7 |
| chr14 | 23866253  | C | T | MYH6    | missense | Subset1 | MeC-4    | 20  | 6   | 30   |
| chr14 | 23866253  | C | T | MYH6    | missense | Subset1 | MeC-5    | 4   | 4   | 100  |
| chr14 | 23866253  | C | T | MYH6    | missense | Subset1 | MeP-4    | 44  | 9   | 20.4 |
| chr14 | 23866253  | C | T | MYH6    | missense | Subset1 | MeP-6    | 19  | 2   | 10.5 |
| chr14 | 23866253  | C | T | MYH6    | missense | Subset1 | MeD-2    | 7   | 4   | 57.1 |
| chr14 | 23866253  | C | T | MYH6    | missense | Subset1 | MeD-7    | 77  | 15  | 19.4 |
| chr14 | 23866253  | C | T | MYH6    | missense | Subset1 | MeD-8    | 19  | 3   | 15.7 |
| chr14 | 23866253  | C | T | MYH6    | missense | Subset1 | MeD-9    | 20  | 8   | 40   |
| chr11 | 62356789  | C | T | TUT1    | intron   | Subset2 | BN-4     | 19  | 4   | 21   |
| chr11 | 62356789  | C | T | TUT1    | intron   | Subset2 | BN-5     | 27  | 5   | 18.5 |
| chr6  | 136500313 | G | A | PDE7B   | intron   | Subset1 | MeC-2    | 69  | 60  | 86.9 |
| chr6  | 136500313 | G | A | PDE7B   | intron   | Subset1 | MeP-2    | 260 | 67  | 25.7 |
| chr6  | 136500313 | G | A | PDE7B   | intron   | Subset1 | MeC-4    | 51  | 15  | 29.4 |
| chr6  | 136500313 | G | A | PDE7B   | intron   | Subset1 | MeP-4    | 37  | 7   | 18.9 |
| chr6  | 136500313 | G | A | PDE7B   | intron   | Subset1 | MeP-6    | 67  | 52  | 77.6 |
| chr6  | 136500313 | G | A | PDE7B   | intron   | Subset1 | DCIS-8   | 31  | 3   | 9.6  |
| chr6  | 136500313 | G | A | PDE7B   | intron   | Subset1 | InvF-10  | 295 | 60  | 20.3 |
| chr6  | 136500313 | G | A | PDE7B   | intron   | Subset1 | InvF-4   | 470 | 177 | 37.6 |
| chr6  | 136500313 | G | A | PDE7B   | intron   | Subset1 | InvF-5   | 9   | 6   | 66.6 |
| chr6  | 136500313 | G | A | PDE7B   | intron   | Subset1 | InvF-11  | 46  | 2   | 4.3  |
| chr6  | 136500313 | G | A | PDE7B   | intron   | Subset1 | InvF-12  | 7   | 7   | 100  |
| chr6  | 136500313 | G | A | PDE7B   | intron   | Subset1 | InvF-9   | 63  | 30  | 47.6 |
| chr6  | 136500313 | G | A | PDE7B   | intron   | Subset1 | MeD-2    | 86  | 2   | 2.3  |
| chr6  | 136500313 | G | A | PDE7B   | intron   | Subset1 | MeD-7    | 151 | 25  | 16.5 |

|       |           |   |   |         |              |         |          |      |      |      |
|-------|-----------|---|---|---------|--------------|---------|----------|------|------|------|
| chr6  | 136500313 | G | A | PDE7B   | intron       | Subset1 | MeD-8    | 34   | 19   | 55.8 |
| chr6  | 136500313 | G | A | PDE7B   | intron       | Subset1 | MeD-9    | 99   | 20   | 20.2 |
| chr6  | 136500313 | G | A | PDE7B   | intron       | Subset1 | S1-11    | 131  | 63   | 48   |
| chr6  | 136500313 | G | A | PDE7B   | intron       | Subset1 | S3-2     | 335  | 142  | 42.3 |
| chr6  | 136500313 | G | A | PDE7B   | intron       | Subset1 | S3-1     | 34   | 3    | 8.8  |
| chr6  | 136500313 | G | A | PDE7B   | intron       | Subset1 | S3-13    | 91   | 8    | 8.7  |
| chr6  | 136500313 | G | A | PDE7B   | intron       | Subset1 | S3-3     | 177  | 12   | 6.7  |
| chr6  | 136500313 | G | A | PDE7B   | intron       | Subset1 | S3-7     | 407  | 300  | 73.7 |
| chr7  | 134252992 | A | C | AKR1B15 | missense     | Subset2 | BN-12    | 331  | 75   | 22.6 |
| chr7  | 134252992 | A | C | AKR1B15 | missense     | Subset2 | BN-15    | 92   | 7    | 7.6  |
| chr7  | 134252992 | A | C | AKR1B15 | missense     | Subset2 | BNM-1    | 59   | 9    | 15.2 |
| chr7  | 134252992 | A | C | AKR1B15 | missense     | Subset2 | BNM-2    | 113  | 15   | 13.2 |
| chr7  | 134252992 | A | C | AKR1B15 | missense     | Subset2 | BNM-3    | 42   | 3    | 7.1  |
| chr10 | 7247868   | C | G | SFMBT2  | missense     | Subset1 | MeC-2    | 693  | 58   | 8.3  |
| chr10 | 7247868   | C | G | SFMBT2  | missense     | Subset1 | MeP-2    | 43   | 9    | 20.9 |
| chr10 | 7247868   | C | G | SFMBT2  | missense     | Subset1 | MeC-1    | 7    | 6    | 85.7 |
| chr10 | 7247868   | C | G | SFMBT2  | missense     | Subset1 | MeC-10   | 4    | 4    | 100  |
| chr10 | 7247868   | C | G | SFMBT2  | missense     | Subset1 | MeC-3    | 170  | 14   | 8.2  |
| chr10 | 7247868   | C | G | SFMBT2  | missense     | Subset1 | MeC-4    | 106  | 48   | 45.2 |
| chr10 | 7247868   | C | G | SFMBT2  | missense     | Subset1 | MeP-12   | 29   | 2    | 6.8  |
| chr10 | 7247868   | C | G | SFMBT2  | missense     | Subset1 | MeP-4    | 61   | 40   | 65.5 |
| chr10 | 7247868   | C | G | SFMBT2  | missense     | Subset1 | MeP-6    | 145  | 19   | 13.1 |
| chr10 | 7247868   | C | G | SFMBT2  | missense     | Subset1 | DCIS-6   | 34   | 10   | 29.4 |
| chr10 | 7247868   | C | G | SFMBT2  | missense     | Subset1 | DCIS-8   | 48   | 9    | 18.7 |
| chr10 | 7247868   | C | G | SFMBT2  | missense     | Subset1 | InvF-10  | 284  | 49   | 17.2 |
| chr10 | 7247868   | C | G | SFMBT2  | missense     | Subset1 | InvF-4   | 365  | 82   | 22.4 |
| chr10 | 7247868   | C | G | SFMBT2  | missense     | Subset1 | InvF-5   | 100  | 4    | 4    |
| chr10 | 7247868   | C | G | SFMBT2  | missense     | Subset1 | InvF-9   | 45   | 8    | 17.7 |
| chr10 | 7247868   | C | G | SFMBT2  | missense     | Subset1 | MeD-2    | 63   | 3    | 4.7  |
| chr10 | 7247868   | C | G | SFMBT2  | missense     | Subset1 | MeD-4    | 104  | 4    | 3.8  |
| chr10 | 7247868   | C | G | SFMBT2  | missense     | Subset1 | MeD-7    | 160  | 17   | 10.6 |
| chr10 | 7247868   | C | G | SFMBT2  | missense     | Subset1 | MeD-8    | 41   | 8    | 19.5 |
| chr10 | 7247868   | C | G | SFMBT2  | missense     | Subset1 | MeD-9    | 133  | 106  | 79.6 |
| chr10 | 7247868   | C | G | SFMBT2  | missense     | Subset1 | M-DCIS-3 | 4    | 2    | 50   |
| chr10 | 7247868   | C | G | SFMBT2  | missense     | Subset1 | S1-11    | 232  | 46   | 19.8 |
| chr10 | 7247868   | C | G | SFMBT2  | missense     | Subset1 | S3-2     | 164  | 58   | 35.3 |
| chr10 | 7247868   | C | G | SFMBT2  | missense     | Subset1 | S3-1     | 125  | 106  | 84.8 |
| chr10 | 7247868   | C | G | SFMBT2  | missense     | Subset1 | S3-13    | 44   | 3    | 6.8  |
| chr10 | 7247868   | C | G | SFMBT2  | missense     | Subset1 | S3-7     | 69   | 44   | 63.7 |
| chr10 | 7247868   | C | G | SFMBT2  | missense     | Subset1 | S1-1     | 16   | 13   | 81.2 |
| chr10 | 7247868   | C | G | SFMBT2  | missense     | Subset1 | S1-2     | 17   | 4    | 23.5 |
| chr12 | 112646352 | C | T | HECTD4  | coding-synon | Subset2 | MeP-12   | 119  | 2    | 1.6  |
| chr12 | 112646352 | C | T | HECTD4  | coding-synon | Subset2 | BN-1     | 230  | 50   | 21.7 |
| chr12 | 112646352 | C | T | HECTD4  | coding-synon | Subset2 | BN-3     | 55   | 41   | 74.5 |
| chr12 | 112646352 | C | T | HECTD4  | coding-synon | Subset2 | BNM-3    | 30   | 6    | 20   |
| chr7  | 31847965  | A | G | PDE1C   | intron       | Subset1 | InvF-10  | 222  | 133  | 59.9 |
| chr7  | 31847965  | A | G | PDE1C   | intron       | Subset1 | InvF-4   | 435  | 420  | 96.5 |
| chr7  | 31847965  | A | G | PDE1C   | intron       | Subset1 | InvF-5   | 137  | 122  | 89   |
| chr7  | 31847965  | A | G | PDE1C   | intron       | Subset1 | InvF-1   | 29   | 3    | 10.3 |
| chr7  | 31847965  | A | G | PDE1C   | intron       | Subset1 | InvF-9   | 82   | 64   | 78   |
| chr1  | 100356847 | T | A | AGL     | missense     | Subset2 | BNM-1    | 32   | 2    | 6.2  |
| chr1  | 100356847 | T | A | AGL     | missense     | Subset2 | BNM-2    | 70   | 16   | 22.8 |
| chr1  | 100356847 | T | A | AGL     | missense     | Subset2 | BNM-3    | 36   | 6    | 16.6 |
| chr8  | 103309664 | G | T | UBR5    | intron       | Subset1 | DCIS-3   | 41   | 6    | 14.6 |
| chr8  | 103309664 | G | T | UBR5    | intron       | Subset1 | DCIS-5   | 7948 | 2073 | 26   |



|       |           |   |   |           |              |         |          |     |     |      |
|-------|-----------|---|---|-----------|--------------|---------|----------|-----|-----|------|
| chr2  | 200801136 | T | C | TYW5      | missense     | Subset2 | BN-3     | 155 | 14  | 9    |
| chr2  | 200801136 | T | C | TYW5      | missense     | Subset2 | BN-4     | 115 | 4   | 3.4  |
| chr2  | 200801136 | T | C | TYW5      | missense     | Subset2 | BN-5     | 217 | 19  | 8.7  |
| chr2  | 200801136 | T | C | TYW5      | missense     | Subset2 | BNM-1    | 75  | 4   | 5.3  |
| chr2  | 200801136 | T | C | TYW5      | missense     | Subset2 | BNM-2    | 135 | 13  | 9.6  |
| chr2  | 200801136 | T | C | TYW5      | missense     | Subset2 | BNM-3    | 107 | 11  | 10.2 |
| chr7  | 2415101   | A | G | EIF3B     | missense     | Subset1 | MeC-2    | 98  | 47  | 47.9 |
| chr7  | 2415101   | A | G | EIF3B     | missense     | Subset1 | MeC-3    | 168 | 83  | 49.4 |
| chr7  | 2415101   | A | G | EIF3B     | missense     | Subset1 | MeC-4    | 94  | 48  | 51   |
| chr7  | 2415101   | A | G | EIF3B     | missense     | Subset1 | MeC-5    | 16  | 10  | 62.5 |
| chr7  | 2415101   | A | G | EIF3B     | missense     | Subset1 | MeC-8    | 61  | 49  | 80.3 |
| chr7  | 2415101   | A | G | EIF3B     | missense     | Subset1 | MeP-1    | 28  | 4   | 14.2 |
| chr7  | 2415101   | A | G | EIF3B     | missense     | Subset1 | MeP-18   | 56  | 56  | 100  |
| chr7  | 2415101   | A | G | EIF3B     | missense     | Subset1 | MeP-12   | 107 | 8   | 7.4  |
| chr7  | 2415101   | A | G | EIF3B     | missense     | Subset1 | MeP-4    | 102 | 75  | 73.5 |
| chr7  | 2415101   | A | G | EIF3B     | missense     | Subset1 | MeP-5    | 8   | 5   | 62.5 |
| chr7  | 2415101   | A | G | EIF3B     | missense     | Subset1 | MeP-6    | 45  | 23  | 51.1 |
| chr7  | 2415101   | A | G | EIF3B     | missense     | Subset1 | DCIS-1   | 50  | 2   | 4    |
| chr7  | 2415101   | A | G | EIF3B     | missense     | Subset1 | DCIS-2   | 44  | 41  | 93.1 |
| chr7  | 2415101   | A | G | EIF3B     | missense     | Subset1 | DCIS-3   | 30  | 17  | 56.6 |
| chr7  | 2415101   | A | G | EIF3B     | missense     | Subset1 | DCIS-5   | 55  | 55  | 100  |
| chr7  | 2415101   | A | G | EIF3B     | missense     | Subset1 | DCIS-6   | 24  | 8   | 33.3 |
| chr7  | 2415101   | A | G | EIF3B     | missense     | Subset1 | DCIS-8   | 16  | 4   | 25   |
| chr7  | 2415101   | A | G | EIF3B     | missense     | Subset1 | InvF-10  | 6   | 5   | 83.3 |
| chr7  | 2415101   | A | G | EIF3B     | missense     | Subset1 | InvF-4   | 15  | 15  | 100  |
| chr7  | 2415101   | A | G | EIF3B     | missense     | Subset1 | InvF-5   | 4   | 4   | 100  |
| chr7  | 2415101   | A | G | EIF3B     | missense     | Subset1 | InvF-1   | 79  | 34  | 43   |
| chr7  | 2415101   | A | G | EIF3B     | missense     | Subset1 | InvF-13  | 23  | 7   | 30.4 |
| chr7  | 2415101   | A | G | EIF3B     | missense     | Subset1 | InvF-9   | 328 | 42  | 12.8 |
| chr7  | 2415101   | A | G | EIF3B     | missense     | Subset1 | MeD-7    | 100 | 13  | 13   |
| chr7  | 2415101   | A | G | EIF3B     | missense     | Subset1 | MeD-8    | 11  | 7   | 63.6 |
| chr7  | 2415101   | A | G | EIF3B     | missense     | Subset1 | MeD-9    | 19  | 11  | 57.8 |
| chr7  | 2415101   | A | G | EIF3B     | missense     | Subset1 | M-DCIS-2 | 62  | 15  | 24.1 |
| chr7  | 2415101   | A | G | EIF3B     | missense     | Subset1 | M-DCIS-5 | 16  | 4   | 25   |
| chr7  | 2415101   | A | G | EIF3B     | missense     | Subset1 | S1-11    | 52  | 27  | 51.9 |
| chr7  | 2415101   | A | G | EIF3B     | missense     | Subset1 | S3-2     | 22  | 11  | 50   |
| chr7  | 2415101   | A | G | EIF3B     | missense     | Subset1 | S3-7     | 31  | 31  | 100  |
| chr7  | 2415101   | A | G | EIF3B     | missense     | Subset1 | S1-2     | 8   | 3   | 37.5 |
| chr7  | 2415101   | A | G | EIF3B     | missense     | Subset1 | S2-14    | 174 | 7   | 4    |
| chrX  | 151821894 | G | A | .         | .            | Subset2 | BN-1     | 33  | 29  | 87.8 |
| chrX  | 151821894 | G | A | .         | .            | Subset2 | BN-10    | 790 | 782 | 98.9 |
| chrX  | 151821894 | G | A | .         | .            | Subset2 | BN-3     | 13  | 8   | 61.5 |
| chrX  | 151821894 | G | A | .         | .            | Subset2 | BNM-3    | 12  | 3   | 25   |
| chr19 | 14910151  | T | C | OR7C1     | coding-synon | Subset2 | BN-10    | 248 | 10  | 4    |
| chr19 | 14910151  | T | C | OR7C1     | coding-synon | Subset2 | BNM-1    | 42  | 5   | 11.9 |
| chr19 | 14910151  | T | C | OR7C1     | coding-synon | Subset2 | BNM-2    | 73  | 4   | 5.4  |
| chr19 | 14910151  | T | C | OR7C1     | coding-synon | Subset2 | BNM-3    | 92  | 18  | 19.5 |
| chr9  | 84607442  | A | T | SPATA31D1 | missense     | Subset1 | MeC-2    | 310 | 67  | 21.6 |
| chr9  | 84607442  | A | T | SPATA31D1 | missense     | Subset1 | MeP-2    | 150 | 12  | 8    |
| chr9  | 84607442  | A | T | SPATA31D1 | missense     | Subset1 | MeC-1    | 4   | 2   | 50   |
| chr9  | 84607442  | A | T | SPATA31D1 | missense     | Subset1 | MeC-11   | 27  | 4   | 14.8 |
| chr9  | 84607442  | A | T | SPATA31D1 | missense     | Subset1 | MeC-3    | 26  | 7   | 26.9 |
| chr9  | 84607442  | A | T | SPATA31D1 | missense     | Subset1 | MeC-4    | 73  | 32  | 43.8 |
| chr9  | 84607442  | A | T | SPATA31D1 | missense     | Subset1 | MeC-8    | 71  | 68  | 95.7 |
| chr9  | 84607442  | A | T | SPATA31D1 | missense     | Subset1 | MeP-4    | 148 | 25  | 16.8 |

|      |           |   |   |                    |         |          |     |     |      |
|------|-----------|---|---|--------------------|---------|----------|-----|-----|------|
| chr9 | 84607442  | A | T | SPATA31D1 missense | Subset1 | MeP-6    | 242 | 9   | 3.7  |
| chr9 | 84607442  | A | T | SPATA31D1 missense | Subset1 | DCIS-1   | 56  | 8   | 14.2 |
| chr9 | 84607442  | A | T | SPATA31D1 missense | Subset1 | DCIS-2   | 14  | 2   | 14.2 |
| chr9 | 84607442  | A | T | SPATA31D1 missense | Subset1 | DCIS-3   | 81  | 12  | 14.8 |
| chr9 | 84607442  | A | T | SPATA31D1 missense | Subset1 | DCIS-5   | 16  | 8   | 50   |
| chr9 | 84607442  | A | T | SPATA31D1 missense | Subset1 | DCIS-6   | 18  | 4   | 22.2 |
| chr9 | 84607442  | A | T | SPATA31D1 missense | Subset1 | DCIS-8   | 41  | 6   | 14.6 |
| chr9 | 84607442  | A | T | SPATA31D1 missense | Subset1 | InvF-10  | 52  | 14  | 26.9 |
| chr9 | 84607442  | A | T | SPATA31D1 missense | Subset1 | InvF-4   | 281 | 85  | 30.2 |
| chr9 | 84607442  | A | T | SPATA31D1 missense | Subset1 | InvF-5   | 6   | 2   | 33.3 |
| chr9 | 84607442  | A | T | SPATA31D1 missense | Subset1 | InvF-11  | 101 | 30  | 29.7 |
| chr9 | 84607442  | A | T | SPATA31D1 missense | Subset1 | InvF-9   | 108 | 17  | 15.7 |
| chr9 | 84607442  | A | T | SPATA31D1 missense | Subset1 | MeD-2    | 153 | 3   | 1.9  |
| chr9 | 84607442  | A | T | SPATA31D1 missense | Subset1 | MeD-4    | 89  | 5   | 5.6  |
| chr9 | 84607442  | A | T | SPATA31D1 missense | Subset1 | MeD-7    | 220 | 58  | 26.3 |
| chr9 | 84607442  | A | T | SPATA31D1 missense | Subset1 | MeD-8    | 156 | 122 | 78.2 |
| chr9 | 84607442  | A | T | SPATA31D1 missense | Subset1 | MeD-9    | 86  | 63  | 73.2 |
| chr9 | 84607442  | A | T | SPATA31D1 missense | Subset1 | M-DCIS-2 | 52  | 2   | 3.8  |
| chr9 | 84607442  | A | T | SPATA31D1 missense | Subset1 | M-DCIS-5 | 128 | 2   | 1.5  |
| chr9 | 84607442  | A | T | SPATA31D1 missense | Subset1 | S1-11    | 102 | 28  | 27.4 |
| chr9 | 84607442  | A | T | SPATA31D1 missense | Subset1 | S3-2     | 132 | 63  | 47.7 |
| chr9 | 84607442  | A | T | SPATA31D1 missense | Subset1 | S3-13    | 70  | 9   | 12.8 |
| chr9 | 84607442  | A | T | SPATA31D1 missense | Subset1 | S3-7     | 64  | 60  | 93.7 |
| chr9 | 84607442  | A | T | SPATA31D1 missense | Subset1 | S1-1     | 321 | 209 | 65.1 |
| chr9 | 84607442  | A | T | SPATA31D1 missense | Subset1 | S1-2     | 82  | 6   | 7.3  |
| chr9 | 84607442  | A | T | SPATA31D1 missense | Subset1 | S1-6     | 127 | 34  | 26.7 |
| chr9 | 84607442  | A | T | SPATA31D1 missense | Subset1 | S2-13    | 518 | 435 | 83.9 |
| chr9 | 84607442  | A | T | SPATA31D1 missense | Subset1 | S2-4     | 139 | 7   | 5    |
| chr9 | 84607442  | A | T | SPATA31D1 missense | Subset1 | BNM-2    | 94  | 2   | 2.1  |
| chr5 | 73072247  | G | T | ARHGEF28 intron    | Subset1 | DCIS-1   | 55  | 2   | 3.6  |
| chr5 | 73072247  | G | T | ARHGEF28 intron    | Subset1 | DCIS-5   | 6   | 2   | 33.3 |
| chr5 | 73072247  | G | T | ARHGEF28 intron    | Subset1 | DCIS-8   | 72  | 36  | 50   |
| chr5 | 73072247  | G | T | ARHGEF28 intron    | Subset1 | M-DCIS-5 | 73  | 3   | 4.1  |
| chr5 | 148699178 | G | A | AFAP1L1 missense   | Subset1 | MeC-2    | 13  | 4   | 30.7 |
| chr5 | 148699178 | G | A | AFAP1L1 missense   | Subset1 | MeC-11   | 56  | 56  | 100  |
| chr5 | 148699178 | G | A | AFAP1L1 missense   | Subset1 | MeC-3    | 10  | 8   | 80   |
| chr5 | 148699178 | G | A | AFAP1L1 missense   | Subset1 | MeC-4    | 86  | 53  | 61.6 |
| chr5 | 148699178 | G | A | AFAP1L1 missense   | Subset1 | MeP-4    | 147 | 101 | 68.7 |
| chr5 | 148699178 | G | A | AFAP1L1 missense   | Subset1 | MeP-6    | 126 | 92  | 73   |
| chr5 | 148699178 | G | A | AFAP1L1 missense   | Subset1 | DCIS-6   | 94  | 3   | 3.1  |
| chr5 | 148699178 | G | A | AFAP1L1 missense   | Subset1 | DCIS-8   | 38  | 4   | 10.5 |
| chr5 | 148699178 | G | A | AFAP1L1 missense   | Subset1 | InvF-10  | 34  | 6   | 17.6 |
| chr5 | 148699178 | G | A | AFAP1L1 missense   | Subset1 | InvF-1   | 11  | 6   | 54.5 |
| chr5 | 148699178 | G | A | AFAP1L1 missense   | Subset1 | InvF-9   | 147 | 77  | 52.3 |
| chr5 | 148699178 | G | A | AFAP1L1 missense   | Subset1 | MeD-2    | 56  | 27  | 48.2 |
| chr5 | 148699178 | G | A | AFAP1L1 missense   | Subset1 | Ly-3     | 40  | 2   | 5    |
| chr5 | 148699178 | G | A | AFAP1L1 missense   | Subset1 | MeD-4    | 71  | 9   | 12.6 |
| chr5 | 148699178 | G | A | AFAP1L1 missense   | Subset1 | MeD-7    | 130 | 14  | 10.7 |
| chr5 | 148699178 | G | A | AFAP1L1 missense   | Subset1 | MeD-8    | 42  | 14  | 33.3 |
| chr5 | 148699178 | G | A | AFAP1L1 missense   | Subset1 | MeD-9    | 64  | 41  | 64   |
| chr5 | 148699178 | G | A | AFAP1L1 missense   | Subset1 | M-DCIS-1 | 27  | 2   | 7.4  |
| chr5 | 148699178 | G | A | AFAP1L1 missense   | Subset1 | M-DCIS-5 | 47  | 2   | 4.2  |
| chr5 | 148699178 | G | A | AFAP1L1 missense   | Subset1 | S1-11    | 73  | 10  | 13.6 |
| chr5 | 148699178 | G | A | AFAP1L1 missense   | Subset1 | S3-2     | 48  | 22  | 45.8 |
| chr5 | 148699178 | G | A | AFAP1L1 missense   | Subset1 | S3-13    | 85  | 9   | 10.5 |

|       |           |   |   |          |              |         |          |     |     |      |
|-------|-----------|---|---|----------|--------------|---------|----------|-----|-----|------|
| chr5  | 148699178 | G | A | AFAP1L1  | missense     | Subset1 | S3-7     | 41  | 26  | 63.4 |
| chr5  | 148699178 | G | A | AFAP1L1  | missense     | Subset1 | S1-2     | 33  | 9   | 27.2 |
| chr5  | 148699178 | G | A | AFAP1L1  | missense     | Subset1 | S1-6     | 18  | 2   | 11.1 |
| chr5  | 148699178 | G | A | AFAP1L1  | missense     | Subset1 | S1-9     | 46  | 9   | 19.5 |
| chr5  | 148699178 | G | A | AFAP1L1  | missense     | Subset1 | BN-4     | 115 | 2   | 1.7  |
| chr5  | 148699178 | G | A | AFAP1L1  | missense     | Subset1 | BNM-1    | 9   | 2   | 22.2 |
| chr4  | 55564710  | T | A | KIT      | missense     | Subset1 | MeC-2    | 33  | 2   | 6    |
| chr4  | 55564710  | T | A | KIT      | missense     | Subset1 | MeP-2    | 109 | 39  | 35.7 |
| chr4  | 55564710  | T | A | KIT      | missense     | Subset1 | MeC-4    | 67  | 26  | 38.8 |
| chr4  | 55564710  | T | A | KIT      | missense     | Subset1 | MeC-8    | 20  | 9   | 45   |
| chr4  | 55564710  | T | A | KIT      | missense     | Subset1 | MeP-12   | 32  | 2   | 6.2  |
| chr4  | 55564710  | T | A | KIT      | missense     | Subset1 | MeP-4    | 31  | 13  | 41.9 |
| chr4  | 55564710  | T | A | KIT      | missense     | Subset1 | MeP-6    | 43  | 13  | 30.2 |
| chr4  | 55564710  | T | A | KIT      | missense     | Subset1 | DCIS-6   | 81  | 8   | 9.8  |
| chr4  | 55564710  | T | A | KIT      | missense     | Subset1 | InvF-1   | 12  | 12  | 100  |
| chr4  | 55564710  | T | A | KIT      | missense     | Subset1 | InvF-9   | 114 | 5   | 4.3  |
| chr4  | 55564710  | T | A | KIT      | missense     | Subset1 | MeD-2    | 60  | 10  | 16.6 |
| chr4  | 55564710  | T | A | KIT      | missense     | Subset1 | MeD-7    | 54  | 4   | 7.4  |
| chr4  | 55564710  | T | A | KIT      | missense     | Subset1 | MeD-8    | 63  | 6   | 9.5  |
| chr4  | 55564710  | T | A | KIT      | missense     | Subset1 | MeD-9    | 57  | 32  | 56.1 |
| chr4  | 55564710  | T | A | KIT      | missense     | Subset1 | M-DCIS-2 | 35  | 3   | 8.5  |
| chr4  | 55564710  | T | A | KIT      | missense     | Subset1 | M-DCIS-5 | 55  | 3   | 5.4  |
| chr4  | 55564710  | T | A | KIT      | missense     | Subset1 | S1-11    | 136 | 40  | 29.4 |
| chr4  | 55564710  | T | A | KIT      | missense     | Subset1 | S3-1     | 189 | 31  | 16.4 |
| chr4  | 55564710  | T | A | KIT      | missense     | Subset1 | S3-7     | 131 | 14  | 10.6 |
| chr4  | 55564710  | T | A | KIT      | missense     | Subset1 | S1-6     | 36  | 6   | 16.6 |
| chr18 | 59919932  | G | A | KIAA1468 | missense     | Subset2 | BN-1     | 206 | 164 | 79.6 |
| chr18 | 59919932  | G | A | KIAA1468 | missense     | Subset2 | BN-10    | 115 | 4   | 3.4  |
| chr18 | 59919932  | G | A | KIAA1468 | missense     | Subset2 | BN-3     | 31  | 4   | 12.9 |
| chr18 | 59919932  | G | A | KIAA1468 | missense     | Subset2 | BN-5     | 32  | 3   | 9.3  |
| chr18 | 59919932  | G | A | KIAA1468 | missense     | Subset2 | BNM-2    | 36  | 3   | 8.3  |
| chr18 | 59919932  | G | A | KIAA1468 | missense     | Subset2 | BNM-3    | 9   | 3   | 33.3 |
| chr19 | 56466570  | C | T | NLRP8    | coding-synon | Subset2 | BN-10    | 199 | 3   | 1.5  |
| chr19 | 56466570  | C | T | NLRP8    | coding-synon | Subset2 | BN-4     | 61  | 52  | 85.2 |
| chr19 | 56466570  | C | T | NLRP8    | coding-synon | Subset2 | BN-5     | 438 | 190 | 43.3 |
| chr19 | 56466570  | C | T | NLRP8    | coding-synon | Subset2 | BNM-1    | 16  | 2   | 12.5 |
| chr19 | 56466570  | C | T | NLRP8    | coding-synon | Subset2 | BNM-3    | 61  | 6   | 9.8  |
| chr18 | 10691421  | T | C | PIEZO2   | intron       | Subset1 | MeC-2    | 121 | 39  | 32.2 |
| chr18 | 10691421  | T | C | PIEZO2   | intron       | Subset1 | MeP-2    | 150 | 14  | 9.3  |
| chr18 | 10691421  | T | C | PIEZO2   | intron       | Subset1 | MeC-3    | 105 | 89  | 84.7 |
| chr18 | 10691421  | T | C | PIEZO2   | intron       | Subset1 | MeC-4    | 68  | 59  | 86.7 |
| chr18 | 10691421  | T | C | PIEZO2   | intron       | Subset1 | MeC-5    | 86  | 48  | 55.8 |
| chr18 | 10691421  | T | C | PIEZO2   | intron       | Subset1 | MeC-8    | 18  | 9   | 50   |
| chr18 | 10691421  | T | C | PIEZO2   | intron       | Subset1 | MeP-4    | 53  | 11  | 20.7 |
| chr18 | 10691421  | T | C | PIEZO2   | intron       | Subset1 | MeP-6    | 62  | 25  | 40.3 |
| chr18 | 10691421  | T | C | PIEZO2   | intron       | Subset1 | DCIS-1   | 29  | 6   | 20.6 |
| chr18 | 10691421  | T | C | PIEZO2   | intron       | Subset1 | DCIS-3   | 146 | 88  | 60.2 |
| chr18 | 10691421  | T | C | PIEZO2   | intron       | Subset1 | DCIS-6   | 39  | 5   | 12.8 |
| chr18 | 10691421  | T | C | PIEZO2   | intron       | Subset1 | DCIS-8   | 50  | 4   | 8    |
| chr18 | 10691421  | T | C | PIEZO2   | intron       | Subset1 | InvF-10  | 86  | 19  | 22   |
| chr18 | 10691421  | T | C | PIEZO2   | intron       | Subset1 | InvF-5   | 204 | 121 | 59.3 |
| chr18 | 10691421  | T | C | PIEZO2   | intron       | Subset1 | InvF-13  | 3   | 3   | 100  |
| chr18 | 10691421  | T | C | PIEZO2   | intron       | Subset1 | InvF-9   | 51  | 5   | 9.8  |
| chr18 | 10691421  | T | C | PIEZO2   | intron       | Subset1 | MeD-2    | 93  | 10  | 10.7 |
| chr18 | 10691421  | T | C | PIEZO2   | intron       | Subset1 | MeD-7    | 65  | 24  | 36.9 |

|       |          |   |   |         |          |         |          |     |     |      |
|-------|----------|---|---|---------|----------|---------|----------|-----|-----|------|
| chr18 | 10691421 | T | C | PIEZO2  | intron   | Subset1 | MeD-8    | 56  | 18  | 32.1 |
| chr18 | 10691421 | T | C | PIEZO2  | intron   | Subset1 | MeD-9    | 44  | 15  | 34   |
| chr18 | 10691421 | T | C | PIEZO2  | intron   | Subset1 | S1-11    | 247 | 49  | 19.8 |
| chr18 | 10691421 | T | C | PIEZO2  | intron   | Subset1 | S3-1     | 43  | 34  | 79   |
| chr18 | 10691421 | T | C | PIEZO2  | intron   | Subset1 | S3-7     | 166 | 5   | 3    |
| chr18 | 10691421 | T | C | PIEZO2  | intron   | Subset1 | S1-1     | 313 | 42  | 13.4 |
| chr18 | 10691421 | T | C | PIEZO2  | intron   | Subset1 | S1-6     | 91  | 7   | 7.6  |
| chr18 | 10691421 | T | C | PIEZO2  | intron   | Subset1 | S1-9     | 17  | 5   | 29.4 |
| chr18 | 10691421 | T | C | PIEZO2  | intron   | Subset1 | S2-10    | 156 | 2   | 1.2  |
| chr18 | 10691421 | T | C | PIEZO2  | intron   | Subset1 | S2-13    | 9   | 7   | 77.7 |
| chr18 | 10691421 | T | C | PIEZO2  | intron   | Subset1 | S2-7     | 17  | 5   | 29.4 |
| chr19 | 19603173 | G | A | GATAD2A | missense | Subset1 | MeC-2    | 72  | 2   | 2.7  |
| chr19 | 19603173 | G | A | GATAD2A | missense | Subset1 | MeP-2    | 7   | 3   | 42.8 |
| chr19 | 19603173 | G | A | GATAD2A | missense | Subset1 | MeC-11   | 7   | 3   | 42.8 |
| chr19 | 19603173 | G | A | GATAD2A | missense | Subset1 | MeC-3    | 93  | 55  | 59.1 |
| chr19 | 19603173 | G | A | GATAD2A | missense | Subset1 | MeC-4    | 72  | 13  | 18   |
| chr19 | 19603173 | G | A | GATAD2A | missense | Subset1 | MeC-8    | 123 | 118 | 95.9 |
| chr19 | 19603173 | G | A | GATAD2A | missense | Subset1 | MeP-18   | 199 | 183 | 91.9 |
| chr19 | 19603173 | G | A | GATAD2A | missense | Subset1 | MeP-4    | 16  | 9   | 56.2 |
| chr19 | 19603173 | G | A | GATAD2A | missense | Subset1 | MeP-6    | 49  | 11  | 22.4 |
| chr19 | 19603173 | G | A | GATAD2A | missense | Subset1 | MeD-2    | 8   | 2   | 25   |
| chr19 | 19603173 | G | A | GATAD2A | missense | Subset1 | MeD-7    | 66  | 2   | 3    |
| chr19 | 19603173 | G | A | GATAD2A | missense | Subset1 | MeD-9    | 43  | 5   | 11.6 |
| chr14 | 59954739 | G | A | L3HYPDH | promoter | Subset1 | MeC-2    | 603 | 53  | 8.7  |
| chr14 | 59954739 | G | A | L3HYPDH | promoter | Subset1 | MeC-11   | 92  | 2   | 2.1  |
| chr14 | 59954739 | G | A | L3HYPDH | promoter | Subset1 | MeC-3    | 118 | 43  | 36.4 |
| chr14 | 59954739 | G | A | L3HYPDH | promoter | Subset1 | MeC-4    | 167 | 53  | 31.7 |
| chr14 | 59954739 | G | A | L3HYPDH | promoter | Subset1 | MeC-8    | 157 | 3   | 1.9  |
| chr14 | 59954739 | G | A | L3HYPDH | promoter | Subset1 | MeP-4    | 215 | 26  | 12   |
| chr14 | 59954739 | G | A | L3HYPDH | promoter | Subset1 | MeP-6    | 75  | 30  | 40   |
| chr14 | 59954739 | G | A | L3HYPDH | promoter | Subset1 | DCIS-1   | 112 | 2   | 1.7  |
| chr14 | 59954739 | G | A | L3HYPDH | promoter | Subset1 | DCIS-2   | 196 | 39  | 19.8 |
| chr14 | 59954739 | G | A | L3HYPDH | promoter | Subset1 | DCIS-3   | 118 | 7   | 5.9  |
| chr14 | 59954739 | G | A | L3HYPDH | promoter | Subset1 | DCIS-6   | 50  | 19  | 38   |
| chr14 | 59954739 | G | A | L3HYPDH | promoter | Subset1 | DCIS-8   | 136 | 9   | 6.6  |
| chr14 | 59954739 | G | A | L3HYPDH | promoter | Subset1 | InvF-10  | 17  | 11  | 64.7 |
| chr14 | 59954739 | G | A | L3HYPDH | promoter | Subset1 | InvF-5   | 14  | 11  | 78.5 |
| chr14 | 59954739 | G | A | L3HYPDH | promoter | Subset1 | InvF-1   | 275 | 56  | 20.3 |
| chr14 | 59954739 | G | A | L3HYPDH | promoter | Subset1 | InvF-12  | 13  | 7   | 53.8 |
| chr14 | 59954739 | G | A | L3HYPDH | promoter | Subset1 | InvF-9   | 57  | 31  | 54.3 |
| chr14 | 59954739 | G | A | L3HYPDH | promoter | Subset1 | MeD-2    | 128 | 9   | 7    |
| chr14 | 59954739 | G | A | L3HYPDH | promoter | Subset1 | MeD-4    | 141 | 5   | 3.5  |
| chr14 | 59954739 | G | A | L3HYPDH | promoter | Subset1 | MeD-7    | 70  | 23  | 32.8 |
| chr14 | 59954739 | G | A | L3HYPDH | promoter | Subset1 | MeD-8    | 115 | 9   | 7.8  |
| chr14 | 59954739 | G | A | L3HYPDH | promoter | Subset1 | MeD-9    | 144 | 52  | 36.1 |
| chr14 | 59954739 | G | A | L3HYPDH | promoter | Subset1 | M-DCIS-8 | 41  | 3   | 7.3  |
| chr14 | 59954739 | G | A | L3HYPDH | promoter | Subset1 | M-DCIS-2 | 98  | 28  | 28.5 |
| chr14 | 59954739 | G | A | L3HYPDH | promoter | Subset1 | M-DCIS-3 | 12  | 4   | 33.3 |
| chr14 | 59954739 | G | A | L3HYPDH | promoter | Subset1 | S1-11    | 748 | 185 | 24.7 |
| chr14 | 59954739 | G | A | L3HYPDH | promoter | Subset1 | S3-2     | 12  | 2   | 16.6 |
| chr14 | 59954739 | G | A | L3HYPDH | promoter | Subset1 | S3-7     | 89  | 14  | 15.7 |
| chr14 | 59954739 | G | A | L3HYPDH | promoter | Subset1 | S1-2     | 79  | 41  | 51.8 |
| chr14 | 59954739 | G | A | L3HYPDH | promoter | Subset1 | S1-6     | 102 | 6   | 5.8  |
| chr14 | 59954739 | G | A | L3HYPDH | promoter | Subset1 | S1-9     | 95  | 8   | 8.4  |
| chr14 | 59954739 | G | A | L3HYPDH | promoter | Subset1 | S2-14    | 52  | 6   | 11.5 |

|       |           |   |   |          |              |         |          |      |     |      |
|-------|-----------|---|---|----------|--------------|---------|----------|------|-----|------|
| chr14 | 59954739  | G | A | L3HYPDH  | promoter     | Subset1 | S2-13    | 39   | 31  | 79.4 |
| chr14 | 59954739  | G | A | L3HYPDH  | promoter     | Subset1 | S2-8     | 27   | 12  | 44.4 |
| chr1  | 155895459 | C | T | KIAA0907 | missense     | Subset2 | BN-5     | 124  | 15  | 12   |
| chr1  | 155895459 | C | T | KIAA0907 | missense     | Subset2 | BN-15    | 199  | 30  | 15   |
| chrX  | 72797180  | A | T | CHIC1    | intron       | Subset1 | InvF-1   | 63   | 3   | 4.7  |
| chrX  | 72797180  | A | T | CHIC1    | intron       | Subset1 | InvF-13  | 31   | 31  | 100  |
| chrX  | 72797180  | A | T | CHIC1    | intron       | Subset1 | InvF-9   | 184  | 6   | 3.2  |
| chr17 | 26856144  | C | A | FOXN1    | coding-synon | Subset2 | BN-3     | 134  | 16  | 11.9 |
| chr17 | 26856144  | C | A | FOXN1    | coding-synon | Subset2 | BN-4     | 32   | 5   | 15.6 |
| chr17 | 26856144  | C | A | FOXN1    | coding-synon | Subset2 | BN-5     | 83   | 2   | 2.4  |
| chr19 | 54201564  | T | A | MIR523   | promoter     | Subset1 | MeC-2    | 121  | 13  | 10.7 |
| chr19 | 54201564  | T | A | MIR523   | promoter     | Subset1 | MeC-11   | 748  | 8   | 1    |
| chr19 | 54201564  | T | A | MIR523   | promoter     | Subset1 | MeC-20   | 21   | 13  | 61.9 |
| chr19 | 54201564  | T | A | MIR523   | promoter     | Subset1 | MeC-3    | 69   | 20  | 28.9 |
| chr19 | 54201564  | T | A | MIR523   | promoter     | Subset1 | MeC-4    | 107  | 20  | 18.6 |
| chr19 | 54201564  | T | A | MIR523   | promoter     | Subset1 | MeC-5    | 16   | 2   | 12.5 |
| chr19 | 54201564  | T | A | MIR523   | promoter     | Subset1 | MeC-8    | 8    | 6   | 75   |
| chr19 | 54201564  | T | A | MIR523   | promoter     | Subset1 | MeP-1    | 50   | 4   | 8    |
| chr19 | 54201564  | T | A | MIR523   | promoter     | Subset1 | MeP-4    | 64   | 16  | 25   |
| chr19 | 54201564  | T | A | MIR523   | promoter     | Subset1 | MeP-6    | 82   | 25  | 30.4 |
| chr19 | 54201564  | T | A | MIR523   | promoter     | Subset1 | DCIS-6   | 114  | 12  | 10.5 |
| chr19 | 54201564  | T | A | MIR523   | promoter     | Subset1 | DCIS-8   | 64   | 12  | 18.7 |
| chr19 | 54201564  | T | A | MIR523   | promoter     | Subset1 | InvF-4   | 52   | 51  | 98   |
| chr19 | 54201564  | T | A | MIR523   | promoter     | Subset1 | InvF-13  | 15   | 2   | 13.3 |
| chr19 | 54201564  | T | A | MIR523   | promoter     | Subset1 | InvF-9   | 89   | 12  | 13.4 |
| chr19 | 54201564  | T | A | MIR523   | promoter     | Subset1 | MeD-2    | 90   | 47  | 52.2 |
| chr19 | 54201564  | T | A | MIR523   | promoter     | Subset1 | MeD-4    | 125  | 4   | 3.2  |
| chr19 | 54201564  | T | A | MIR523   | promoter     | Subset1 | MeD-7    | 251  | 22  | 8.7  |
| chr19 | 54201564  | T | A | MIR523   | promoter     | Subset1 | MeD-8    | 92   | 33  | 35.8 |
| chr19 | 54201564  | T | A | MIR523   | promoter     | Subset1 | MeD-9    | 153  | 144 | 94.1 |
| chr19 | 54201564  | T | A | MIR523   | promoter     | Subset1 | M-DCIS-2 | 40   | 3   | 7.5  |
| chr19 | 54201564  | T | A | MIR523   | promoter     | Subset1 | M-DCIS-3 | 16   | 12  | 75   |
| chr19 | 54201564  | T | A | MIR523   | promoter     | Subset1 | M-DCIS-5 | 65   | 20  | 30.7 |
| chr19 | 54201564  | T | A | MIR523   | promoter     | Subset1 | S1-11    | 202  | 98  | 48.5 |
| chr19 | 54201564  | T | A | MIR523   | promoter     | Subset1 | S3-2     | 42   | 2   | 4.7  |
| chr19 | 54201564  | T | A | MIR523   | promoter     | Subset1 | S3-13    | 30   | 16  | 53.3 |
| chr19 | 54201564  | T | A | MIR523   | promoter     | Subset1 | S1-12    | 102  | 4   | 3.9  |
| chr19 | 54201564  | T | A | MIR523   | promoter     | Subset1 | S1-2     | 104  | 7   | 6.7  |
| chr19 | 54201564  | T | A | MIR523   | promoter     | Subset1 | S1-9     | 22   | 2   | 9    |
| chr19 | 54201564  | T | A | MIR523   | promoter     | Subset1 | S2-10    | 1321 | 128 | 9.6  |
| chr19 | 54201564  | T | A | MIR523   | promoter     | Subset1 | S2-4     | 91   | 3   | 3.2  |
| chr19 | 54201564  | T | A | MIR523   | promoter     | Subset1 | S2-7     | 56   | 43  | 76.7 |
| chr22 | 30856049  | C | T | SEC14L3  | missense     | Subset1 | MeC-2    | 181  | 116 | 64   |
| chr22 | 30856049  | C | T | SEC14L3  | missense     | Subset1 | MeP-2    | 72   | 11  | 15.2 |
| chr22 | 30856049  | C | T | SEC14L3  | missense     | Subset1 | MeC-10   | 22   | 19  | 86.3 |
| chr22 | 30856049  | C | T | SEC14L3  | missense     | Subset1 | MeC-20   | 4    | 3   | 75   |
| chr22 | 30856049  | C | T | SEC14L3  | missense     | Subset1 | MeC-3    | 3912 | 379 | 9.6  |
| chr22 | 30856049  | C | T | SEC14L3  | missense     | Subset1 | MeC-4    | 219  | 75  | 34.2 |
| chr22 | 30856049  | C | T | SEC14L3  | missense     | Subset1 | MeC-5    | 40   | 33  | 82.5 |
| chr22 | 30856049  | C | T | SEC14L3  | missense     | Subset1 | MeC-8    | 133  | 42  | 31.5 |
| chr22 | 30856049  | C | T | SEC14L3  | missense     | Subset1 | MeP-17   | 9    | 2   | 22.2 |
| chr22 | 30856049  | C | T | SEC14L3  | missense     | Subset1 | MeP-4    | 468  | 119 | 25.4 |
| chr22 | 30856049  | C | T | SEC14L3  | missense     | Subset1 | MeP-6    | 134  | 36  | 26.8 |
| chr22 | 30856049  | C | T | SEC14L3  | missense     | Subset1 | DCIS-1   | 215  | 85  | 39.5 |
| chr22 | 30856049  | C | T | SEC14L3  | missense     | Subset1 | DCIS-2   | 171  | 32  | 18.7 |

|       |          |   |   |         |          |         |          |     |     |      |
|-------|----------|---|---|---------|----------|---------|----------|-----|-----|------|
| chr22 | 30856049 | C | T | SEC14L3 | missense | Subset1 | DCIS-3   | 230 | 53  | 23   |
| chr22 | 30856049 | C | T | SEC14L3 | missense | Subset1 | DCIS-6   | 58  | 18  | 31   |
| chr22 | 30856049 | C | T | SEC14L3 | missense | Subset1 | DCIS-8   | 57  | 3   | 5.2  |
| chr22 | 30856049 | C | T | SEC14L3 | missense | Subset1 | InvF-10  | 47  | 8   | 17   |
| chr22 | 30856049 | C | T | SEC14L3 | missense | Subset1 | InvF-5   | 10  | 9   | 90   |
| chr22 | 30856049 | C | T | SEC14L3 | missense | Subset1 | InvF-1   | 55  | 55  | 100  |
| chr22 | 30856049 | C | T | SEC14L3 | missense | Subset1 | InvF-11  | 345 | 13  | 3.7  |
| chr22 | 30856049 | C | T | SEC14L3 | missense | Subset1 | InvF-12  | 196 | 2   | 1    |
| chr22 | 30856049 | C | T | SEC14L3 | missense | Subset1 | InvF-8   | 18  | 14  | 77.7 |
| chr22 | 30856049 | C | T | SEC14L3 | missense | Subset1 | InvF-9   | 140 | 137 | 97.8 |
| chr22 | 30856049 | C | T | SEC14L3 | missense | Subset1 | MeD-2    | 110 | 45  | 40.9 |
| chr22 | 30856049 | C | T | SEC14L3 | missense | Subset1 | MeD-4    | 115 | 5   | 4.3  |
| chr22 | 30856049 | C | T | SEC14L3 | missense | Subset1 | MeD-7    | 325 | 15  | 4.6  |
| chr22 | 30856049 | C | T | SEC14L3 | missense | Subset1 | MeD-8    | 61  | 7   | 11.4 |
| chr22 | 30856049 | C | T | SEC14L3 | missense | Subset1 | MeD-9    | 39  | 13  | 33.3 |
| chr22 | 30856049 | C | T | SEC14L3 | missense | Subset1 | M-DCIS-2 | 291 | 148 | 50.8 |
| chr22 | 30856049 | C | T | SEC14L3 | missense | Subset1 | S1-11    | 169 | 59  | 34.9 |
| chr22 | 30856049 | C | T | SEC14L3 | missense | Subset1 | S3-2     | 47  | 5   | 10.6 |
| chr22 | 30856049 | C | T | SEC14L3 | missense | Subset1 | S3-13    | 234 | 35  | 14.9 |
| chr22 | 30856049 | C | T | SEC14L3 | missense | Subset1 | S1-6     | 101 | 4   | 3.9  |
| chr22 | 30856049 | C | T | SEC14L3 | missense | Subset1 | S1-9     | 13  | 7   | 53.8 |
| chr22 | 30856049 | C | T | SEC14L3 | missense | Subset1 | S2-13    | 21  | 11  | 52.3 |
| chr22 | 30856049 | C | T | SEC14L3 | missense | Subset1 | S2-4     | 175 | 4   | 2.2  |
| chr22 | 30856049 | C | T | SEC14L3 | missense | Subset1 | S2-7     | 67  | 3   | 4.4  |
| chr11 | 93826773 | C | T | HEPHL1  | nonsense | Subset2 | BNM-1    | 89  | 8   | 8.9  |
| chr11 | 93826773 | C | T | HEPHL1  | nonsense | Subset2 | BNM-2    | 178 | 17  | 9.5  |
| chr11 | 93826773 | C | T | HEPHL1  | nonsense | Subset2 | BNM-3    | 156 | 19  | 12.1 |
| chr6  | 43535248 | A | G | XPO5    | intron   | Subset2 | BN-4     | 27  | 5   | 18.5 |
| chr6  | 43535248 | A | G | XPO5    | intron   | Subset2 | BN-5     | 23  | 19  | 82.6 |
| chr6  | 43535248 | A | G | XPO5    | intron   | Subset2 | BN-15    | 6   | 6   | 100  |
| chr2  | 33614215 | A | G | LTBP1   | intron   | Subset3 | Ly-10    | 149 | 8   | 5.3  |
| chr2  | 33614215 | A | G | LTBP1   | intron   | Subset3 | Ly-3     | 195 | 101 | 51.7 |
| chr2  | 33614215 | A | G | LTBP1   | intron   | Subset3 | M-DCIS-5 | 97  | 2   | 2    |
| chr2  | 33614215 | A | G | LTBP1   | intron   | Subset3 | S3-2     | 138 | 2   | 1.4  |
| chr2  | 33614215 | A | G | LTBP1   | intron   | Subset3 | S1-4     | 86  | 7   | 8.1  |
| chr10 | 75006655 | A | T | DNAJC9  | intron   | Subset1 | MeC-2    | 13  | 2   | 15.3 |
| chr10 | 75006655 | A | T | DNAJC9  | intron   | Subset1 | MeP-2    | 60  | 22  | 36.6 |
| chr10 | 75006655 | A | T | DNAJC9  | intron   | Subset1 | MeC-1    | 6   | 2   | 33.3 |
| chr10 | 75006655 | A | T | DNAJC9  | intron   | Subset1 | MeC-3    | 63  | 29  | 46   |
| chr10 | 75006655 | A | T | DNAJC9  | intron   | Subset1 | MeC-4    | 40  | 7   | 17.5 |
| chr10 | 75006655 | A | T | DNAJC9  | intron   | Subset1 | MeC-5    | 40  | 31  | 77.5 |
| chr10 | 75006655 | A | T | DNAJC9  | intron   | Subset1 | MeC-8    | 78  | 3   | 3.8  |
| chr10 | 75006655 | A | T | DNAJC9  | intron   | Subset1 | MeP-4    | 51  | 46  | 90.1 |
| chr10 | 75006655 | A | T | DNAJC9  | intron   | Subset1 | MeP-6    | 42  | 6   | 14.2 |
| chr10 | 75006655 | A | T | DNAJC9  | intron   | Subset1 | DCIS-1   | 39  | 5   | 12.8 |
| chr10 | 75006655 | A | T | DNAJC9  | intron   | Subset1 | DCIS-2   | 28  | 2   | 7.1  |
| chr10 | 75006655 | A | T | DNAJC9  | intron   | Subset1 | DCIS-3   | 55  | 36  | 65.4 |
| chr10 | 75006655 | A | T | DNAJC9  | intron   | Subset1 | InvF-10  | 7   | 6   | 85.7 |
| chr10 | 75006655 | A | T | DNAJC9  | intron   | Subset1 | InvF-4   | 6   | 6   | 100  |
| chr10 | 75006655 | A | T | DNAJC9  | intron   | Subset1 | InvF-13  | 117 | 57  | 48.7 |
| chr10 | 75006655 | A | T | DNAJC9  | intron   | Subset1 | InvF-9   | 157 | 126 | 80.2 |
| chr10 | 75006655 | A | T | DNAJC9  | intron   | Subset1 | MeD-7    | 46  | 4   | 8.6  |
| chr10 | 75006655 | A | T | DNAJC9  | intron   | Subset1 | MeD-8    | 39  | 16  | 41   |
| chr10 | 75006655 | A | T | DNAJC9  | intron   | Subset1 | MeD-9    | 68  | 32  | 47   |
| chr10 | 75006655 | A | T | DNAJC9  | intron   | Subset1 | S1-11    | 125 | 66  | 52.8 |

|       |           |   |   |        |              |         |          |     |     |      |
|-------|-----------|---|---|--------|--------------|---------|----------|-----|-----|------|
| chr10 | 75006655  | A | T | DNAJC9 | intron       | Subset1 | S3-13    | 45  | 20  | 44.4 |
| chr10 | 75006655  | A | T | DNAJC9 | intron       | Subset1 | S3-7     | 15  | 14  | 93.3 |
| chr10 | 75006655  | A | T | DNAJC9 | intron       | Subset1 | S1-1     | 17  | 6   | 35.2 |
| chr10 | 75006655  | A | T | DNAJC9 | intron       | Subset1 | S1-12    | 139 | 2   | 1.4  |
| chr10 | 75006655  | A | T | DNAJC9 | intron       | Subset1 | S1-6     | 34  | 3   | 8.8  |
| chr10 | 75006655  | A | T | DNAJC9 | intron       | Subset1 | S2-14    | 39  | 2   | 5.1  |
| chr10 | 75006655  | A | T | DNAJC9 | intron       | Subset1 | S2-4     | 51  | 4   | 7.8  |
| chrX  | 53239909  | A | C | KDM5C  | missense     | Subset3 | MeC-2    | 47  | 3   | 6.3  |
| chrX  | 53239909  | A | C | KDM5C  | missense     | Subset3 | MeC-3    | 155 | 11  | 7    |
| chrX  | 53239909  | A | C | KDM5C  | missense     | Subset3 | DCIS-1   | 251 | 67  | 26.6 |
| chrX  | 53239909  | A | C | KDM5C  | missense     | Subset3 | DCIS-3   | 66  | 4   | 6    |
| chrX  | 53239909  | A | C | KDM5C  | missense     | Subset3 | DCIS-8   | 135 | 2   | 1.4  |
| chrX  | 53239909  | A | C | KDM5C  | missense     | Subset3 | InvF-11  | 189 | 14  | 7.4  |
| chrX  | 53239909  | A | C | KDM5C  | missense     | Subset3 | InvF-13  | 80  | 72  | 90   |
| chrX  | 53239909  | A | C | KDM5C  | missense     | Subset3 | InvF-9   | 59  | 5   | 8.4  |
| chrX  | 53239909  | A | C | KDM5C  | missense     | Subset3 | Ly-10    | 151 | 4   | 2.6  |
| chrX  | 53239909  | A | C | KDM5C  | missense     | Subset3 | MeD-2    | 118 | 4   | 3.3  |
| chrX  | 53239909  | A | C | KDM5C  | missense     | Subset3 | MeD-4    | 183 | 3   | 1.6  |
| chrX  | 53239909  | A | C | KDM5C  | missense     | Subset3 | MeD-7    | 287 | 22  | 7.6  |
| chrX  | 53239909  | A | C | KDM5C  | missense     | Subset3 | M-DCIS-8 | 24  | 12  | 50   |
| chrX  | 53239909  | A | C | KDM5C  | missense     | Subset3 | M-DCIS-5 | 89  | 3   | 3.3  |
| chrX  | 53239909  | A | C | KDM5C  | missense     | Subset3 | S3-13    | 169 | 3   | 1.7  |
| chrX  | 53239909  | A | C | KDM5C  | missense     | Subset3 | S1-12    | 43  | 3   | 6.9  |
| chrX  | 53239909  | A | C | KDM5C  | missense     | Subset3 | S1-6     | 146 | 2   | 1.3  |
| chrX  | 53239909  | A | C | KDM5C  | missense     | Subset3 | S2-10    | 30  | 2   | 6.6  |
| chrX  | 53239909  | A | C | KDM5C  | missense     | Subset3 | S2-2     | 29  | 3   | 10.3 |
| chrX  | 53239909  | A | C | KDM5C  | missense     | Subset3 | S2-13    | 39  | 26  | 66.6 |
| chrX  | 53239909  | A | C | KDM5C  | missense     | Subset3 | S2-4     | 381 | 4   | 1    |
| chrX  | 53239909  | A | C | KDM5C  | missense     | Subset3 | S2-8     | 392 | 10  | 2.5  |
| chrX  | 53239909  | A | C | KDM5C  | missense     | Subset3 | S2-9     | 191 | 42  | 21.9 |
| chrX  | 53239909  | A | C | KDM5C  | missense     | Subset3 | BN-4     | 135 | 2   | 1.4  |
| chr4  | 122784286 | T | C | BBS7   | intron       | Subset2 | BN-1     | 2   | 2   | 100  |
| chr4  | 122784286 | T | C | BBS7   | intron       | Subset2 | BN-11    | 9   | 3   | 33.3 |
| chr4  | 122784286 | T | C | BBS7   | intron       | Subset2 | BNM-1    | 30  | 3   | 10   |
| chr4  | 122784286 | T | C | BBS7   | intron       | Subset2 | BNM-2    | 70  | 5   | 7.1  |
| chr4  | 122784286 | T | C | BBS7   | intron       | Subset2 | BNM-3    | 28  | 10  | 35.7 |
| chr18 | 77895881  | A | T | ADNP2  | missense     | Subset2 | BN-1     | 86  | 85  | 98.8 |
| chr18 | 77895881  | A | T | ADNP2  | missense     | Subset2 | BN-10    | 26  | 8   | 30.7 |
| chr18 | 77895881  | A | T | ADNP2  | missense     | Subset2 | BN-5     | 21  | 5   | 23.8 |
| chr18 | 77895881  | A | T | ADNP2  | missense     | Subset2 | BN-11    | 4   | 2   | 50   |
| chr18 | 77895881  | A | T | ADNP2  | missense     | Subset2 | BNM-2    | 23  | 3   | 13   |
| chr18 | 77895881  | A | T | ADNP2  | missense     | Subset2 | BNM-3    | 11  | 2   | 18.1 |
| chr15 | 26825646  | G | A | GABRB3 | intron       | Subset2 | BN-1     | 120 | 86  | 71.6 |
| chr15 | 26825646  | G | A | GABRB3 | intron       | Subset2 | DCIS-1   | 101 | 2   | 1.9  |
| chr15 | 26825646  | G | A | GABRB3 | intron       | Subset2 | BNM-2    | 25  | 2   | 8    |
| chr15 | 26825646  | G | A | GABRB3 | intron       | Subset2 | BNM-3    | 22  | 6   | 27.2 |
| chr3  | 178952085 | A | G | PIK3CA | missense     | Subset2 | BN-1     | 399 | 156 | 39   |
| chr3  | 178952085 | A | G | PIK3CA | missense     | Subset2 | BN-12    | 315 | 118 | 37.4 |
| chr3  | 178952085 | A | G | PIK3CA | missense     | Subset2 | BN-3     | 27  | 5   | 18.5 |
| chr3  | 178952085 | A | G | PIK3CA | missense     | Subset2 | BN-11    | 67  | 22  | 32.8 |
| chr3  | 178952085 | A | G | PIK3CA | missense     | Subset2 | BNM-2    | 59  | 9   | 15.2 |
| chr3  | 178952085 | A | G | PIK3CA | missense     | Subset2 | BNM-3    | 65  | 5   | 7.6  |
| chr22 | 31522431  | G | A | INPP5J | coding-synon | Subset3 | DCIS-1   | 52  | 2   | 3.8  |
| chr22 | 31522431  | G | A | INPP5J | coding-synon | Subset3 | Ly-3     | 102 | 10  | 9.8  |
| chr22 | 31522431  | G | A | INPP5J | coding-synon | Subset3 | S1-11    | 4   | 3   | 75   |

|       |           |   |   |         |              |         |          |      |     |      |
|-------|-----------|---|---|---------|--------------|---------|----------|------|-----|------|
| chr22 | 31522431  | G | A | INPP5J  | coding-synon | Subset3 | S3-9     | 162  | 2   | 1.2  |
| chr22 | 31522431  | G | A | INPP5J  | coding-synon | Subset3 | S1-2     | 8    | 5   | 62.5 |
| chr22 | 31522431  | G | A | INPP5J  | coding-synon | Subset3 | S2-14    | 119  | 29  | 24.3 |
| chr22 | 31522431  | G | A | INPP5J  | coding-synon | Subset3 | S2-5     | 318  | 7   | 2.2  |
| chr22 | 31522431  | G | A | INPP5J  | coding-synon | Subset3 | S2-9     | 10   | 4   | 40   |
| chr4  | 187207577 | C | T | F11     | nonsense     | Subset1 | MeC-2    | 1053 | 298 | 28.3 |
| chr4  | 187207577 | C | T | F11     | nonsense     | Subset1 | MeP-2    | 73   | 34  | 46.5 |
| chr4  | 187207577 | C | T | F11     | nonsense     | Subset1 | MeC-10   | 9    | 2   | 22.2 |
| chr4  | 187207577 | C | T | F11     | nonsense     | Subset1 | MeC-11   | 10   | 6   | 60   |
| chr4  | 187207577 | C | T | F11     | nonsense     | Subset1 | MeC-4    | 120  | 51  | 42.5 |
| chr4  | 187207577 | C | T | F11     | nonsense     | Subset1 | MeC-5    | 15   | 2   | 13.3 |
| chr4  | 187207577 | C | T | F11     | nonsense     | Subset1 | MeP-1    | 34   | 3   | 8.8  |
| chr4  | 187207577 | C | T | F11     | nonsense     | Subset1 | MeP-4    | 45   | 41  | 91.1 |
| chr4  | 187207577 | C | T | F11     | nonsense     | Subset1 | MeP-5    | 28   | 6   | 21.4 |
| chr4  | 187207577 | C | T | F11     | nonsense     | Subset1 | MeP-6    | 269  | 168 | 62.4 |
| chr4  | 187207577 | C | T | F11     | nonsense     | Subset1 | DCIS-1   | 76   | 6   | 7.8  |
| chr4  | 187207577 | C | T | F11     | nonsense     | Subset1 | DCIS-2   | 29   | 9   | 31   |
| chr4  | 187207577 | C | T | F11     | nonsense     | Subset1 | DCIS-3   | 63   | 2   | 3.1  |
| chr4  | 187207577 | C | T | F11     | nonsense     | Subset1 | DCIS-8   | 67   | 7   | 10.4 |
| chr4  | 187207577 | C | T | F11     | nonsense     | Subset1 | MeD-2    | 51   | 25  | 49   |
| chr4  | 187207577 | C | T | F11     | nonsense     | Subset1 | MeD-4    | 123  | 2   | 1.6  |
| chr4  | 187207577 | C | T | F11     | nonsense     | Subset1 | MeD-7    | 135  | 13  | 9.6  |
| chr4  | 187207577 | C | T | F11     | nonsense     | Subset1 | MeD-8    | 60   | 12  | 20   |
| chr4  | 187207577 | C | T | F11     | nonsense     | Subset1 | MeD-9    | 62   | 27  | 43.5 |
| chr4  | 187207577 | C | T | F11     | nonsense     | Subset1 | M-DCIS-1 | 88   | 2   | 2.2  |
| chr4  | 187207577 | C | T | F11     | nonsense     | Subset1 | M-DCIS-5 | 118  | 4   | 3.3  |
| chr4  | 187207577 | C | T | F11     | nonsense     | Subset1 | S1-11    | 480  | 89  | 18.5 |
| chr4  | 187207577 | C | T | F11     | nonsense     | Subset1 | S3-2     | 6    | 2   | 33.3 |
| chr4  | 187207577 | C | T | F11     | nonsense     | Subset1 | S3-1     | 77   | 6   | 7.7  |
| chr4  | 187207577 | C | T | F11     | nonsense     | Subset1 | S3-13    | 36   | 2   | 5.5  |
| chr8  | 97270718  | C | G | MTERFD1 | missense     | Subset1 | MeC-2    | 135  | 38  | 28.1 |
| chr8  | 97270718  | C | G | MTERFD1 | missense     | Subset1 | MeP-2    | 99   | 76  | 76.7 |
| chr8  | 97270718  | C | G | MTERFD1 | missense     | Subset1 | MeC-11   | 7    | 2   | 28.5 |
| chr8  | 97270718  | C | G | MTERFD1 | missense     | Subset1 | MeC-3    | 18   | 6   | 33.3 |
| chr8  | 97270718  | C | G | MTERFD1 | missense     | Subset1 | MeC-4    | 148  | 59  | 39.8 |
| chr8  | 97270718  | C | G | MTERFD1 | missense     | Subset1 | MeP-12   | 47   | 2   | 4.2  |
| chr8  | 97270718  | C | G | MTERFD1 | missense     | Subset1 | MeP-4    | 172  | 9   | 5.2  |
| chr8  | 97270718  | C | G | MTERFD1 | missense     | Subset1 | MeP-6    | 132  | 15  | 11.3 |
| chr8  | 97270718  | C | G | MTERFD1 | missense     | Subset1 | DCIS-1   | 41   | 4   | 9.7  |
| chr8  | 97270718  | C | G | MTERFD1 | missense     | Subset1 | DCIS-3   | 41   | 3   | 7.3  |
| chr8  | 97270718  | C | G | MTERFD1 | missense     | Subset1 | DCIS-6   | 35   | 5   | 14.2 |
| chr8  | 97270718  | C | G | MTERFD1 | missense     | Subset1 | DCIS-8   | 42   | 10  | 23.8 |
| chr8  | 97270718  | C | G | MTERFD1 | missense     | Subset1 | InvF-10  | 8    | 2   | 25   |
| chr8  | 97270718  | C | G | MTERFD1 | missense     | Subset1 | InvF-5   | 23   | 23  | 100  |
| chr8  | 97270718  | C | G | MTERFD1 | missense     | Subset1 | InvF-11  | 63   | 7   | 11.1 |
| chr8  | 97270718  | C | G | MTERFD1 | missense     | Subset1 | InvF-13  | 5    | 4   | 80   |
| chr8  | 97270718  | C | G | MTERFD1 | missense     | Subset1 | InvF-9   | 421  | 5   | 1.1  |
| chr8  | 97270718  | C | G | MTERFD1 | missense     | Subset1 | MeD-2    | 89   | 25  | 28   |
| chr8  | 97270718  | C | G | MTERFD1 | missense     | Subset1 | MeD-4    | 132  | 5   | 3.7  |
| chr8  | 97270718  | C | G | MTERFD1 | missense     | Subset1 | MeD-7    | 217  | 11  | 5    |
| chr8  | 97270718  | C | G | MTERFD1 | missense     | Subset1 | MeD-8    | 94   | 13  | 13.8 |
| chr8  | 97270718  | C | G | MTERFD1 | missense     | Subset1 | MeD-9    | 196  | 52  | 26.5 |
| chr8  | 97270718  | C | G | MTERFD1 | missense     | Subset1 | M-DCIS-8 | 17   | 2   | 11.7 |
| chr8  | 97270718  | C | G | MTERFD1 | missense     | Subset1 | S1-11    | 156  | 47  | 30.1 |
| chr8  | 97270718  | C | G | MTERFD1 | missense     | Subset1 | S3-13    | 82   | 20  | 24.3 |



|       |           |   |   |          |              |         |          |      |     |      |
|-------|-----------|---|---|----------|--------------|---------|----------|------|-----|------|
| chr8  | 97270718  | C | G | MTERFD1  | missense     | Subset1 | S1-2     | 46   | 4   | 8.6  |
| chr8  | 97270718  | C | G | MTERFD1  | missense     | Subset1 | S1-9     | 20   | 6   | 30   |
| chr8  | 97270718  | C | G | MTERFD1  | missense     | Subset1 | S2-14    | 53   | 2   | 3.7  |
| chr8  | 97270718  | C | G | MTERFD1  | missense     | Subset1 | S2-5     | 1247 | 28  | 2.2  |
| chr8  | 97270718  | C | G | MTERFD1  | missense     | Subset1 | S2-7     | 83   | 5   | 6    |
| chr4  | 101051130 | G | A | .        | .            | Subset2 | BNM-2    | 36   | 3   | 8.3  |
| chr4  | 101051130 | G | A | .        | .            | Subset2 | BNM-3    | 39   | 6   | 15.3 |
| chr4  | 56886813  | A | G | CEP135   | intron       | Subset1 | MeC-2    | 54   | 33  | 61.1 |
| chr4  | 56886813  | A | G | CEP135   | intron       | Subset1 | MeP-2    | 162  | 35  | 21.6 |
| chr4  | 56886813  | A | G | CEP135   | intron       | Subset1 | MeC-10   | 5    | 3   | 60   |
| chr4  | 56886813  | A | G | CEP135   | intron       | Subset1 | MeC-16   | 6    | 6   | 100  |
| chr4  | 56886813  | A | G | CEP135   | intron       | Subset1 | MeC-20   | 8    | 8   | 100  |
| chr4  | 56886813  | A | G | CEP135   | intron       | Subset1 | MeC-4    | 659  | 618 | 93.7 |
| chr4  | 56886813  | A | G | CEP135   | intron       | Subset1 | MeC-5    | 49   | 23  | 46.9 |
| chr4  | 56886813  | A | G | CEP135   | intron       | Subset1 | MeP-18   | 2    | 2   | 100  |
| chr4  | 56886813  | A | G | CEP135   | intron       | Subset1 | MeP-4    | 104  | 9   | 8.6  |
| chr4  | 56886813  | A | G | CEP135   | intron       | Subset1 | MeP-6    | 28   | 7   | 25   |
| chr4  | 56886813  | A | G | CEP135   | intron       | Subset1 | DCIS-8   | 42   | 6   | 14.2 |
| chr4  | 56886813  | A | G | CEP135   | intron       | Subset1 | InvF-4   | 5    | 3   | 60   |
| chr4  | 56886813  | A | G | CEP135   | intron       | Subset1 | InvF-13  | 6    | 2   | 33.3 |
| chr4  | 56886813  | A | G | CEP135   | intron       | Subset1 | InvF-9   | 32   | 24  | 75   |
| chr4  | 56886813  | A | G | CEP135   | intron       | Subset1 | MeD-2    | 258  | 62  | 24   |
| chr4  | 56886813  | A | G | CEP135   | intron       | Subset1 | MeD-4    | 116  | 3   | 2.5  |
| chr4  | 56886813  | A | G | CEP135   | intron       | Subset1 | MeD-7    | 221  | 26  | 11.7 |
| chr4  | 56886813  | A | G | CEP135   | intron       | Subset1 | MeD-8    | 97   | 36  | 37.1 |
| chr4  | 56886813  | A | G | CEP135   | intron       | Subset1 | MeD-9    | 102  | 46  | 45   |
| chr4  | 56886813  | A | G | CEP135   | intron       | Subset1 | M-DCIS-8 | 34   | 8   | 23.5 |
| chr4  | 56886813  | A | G | CEP135   | intron       | Subset1 | M-DCIS-5 | 74   | 3   | 4    |
| chr4  | 56886813  | A | G | CEP135   | intron       | Subset1 | S1-11    | 363  | 130 | 35.8 |
| chr4  | 56886813  | A | G | CEP135   | intron       | Subset1 | S3-2     | 5    | 2   | 40   |
| chr4  | 56886813  | A | G | CEP135   | intron       | Subset1 | S3-7     | 27   | 14  | 51.8 |
| chr4  | 56886813  | A | G | CEP135   | intron       | Subset1 | S1-12    | 19   | 3   | 15.7 |
| chr4  | 56886813  | A | G | CEP135   | intron       | Subset1 | S1-2     | 12   | 5   | 41.6 |
| chr4  | 56886813  | A | G | CEP135   | intron       | Subset1 | S1-6     | 207  | 27  | 13   |
| chr4  | 56886813  | A | G | CEP135   | intron       | Subset1 | S1-9     | 34   | 25  | 73.5 |
| chr19 | 12155067  | G | A | ZNF878   | coding-synon | Subset3 | MeP-16   | 10   | 5   | 50   |
| chr19 | 12155067  | G | A | ZNF878   | coding-synon | Subset3 | DCIS-3   | 100  | 9   | 9    |
| chr19 | 12155067  | G | A | ZNF878   | coding-synon | Subset3 | DCIS-8   | 55   | 7   | 12.7 |
| chr19 | 12155067  | G | A | ZNF878   | coding-synon | Subset3 | S1-11    | 399  | 9   | 2.2  |
| chr11 | 93412579  | C | G | KIAA1731 | missense     | Subset1 | MeC-2    | 98   | 54  | 55.1 |
| chr11 | 93412579  | C | G | KIAA1731 | missense     | Subset1 | MeP-2    | 292  | 61  | 20.8 |
| chr11 | 93412579  | C | G | KIAA1731 | missense     | Subset1 | MeC-3    | 74   | 70  | 94.5 |
| chr11 | 93412579  | C | G | KIAA1731 | missense     | Subset1 | MeC-4    | 271  | 164 | 60.5 |
| chr11 | 93412579  | C | G | KIAA1731 | missense     | Subset1 | MeC-5    | 71   | 70  | 98.5 |
| chr11 | 93412579  | C | G | KIAA1731 | missense     | Subset1 | MeP-1    | 49   | 9   | 18.3 |
| chr11 | 93412579  | C | G | KIAA1731 | missense     | Subset1 | MeP-4    | 105  | 12  | 11.4 |
| chr11 | 93412579  | C | G | KIAA1731 | missense     | Subset1 | MeP-6    | 28   | 11  | 39.2 |
| chr11 | 93412579  | C | G | KIAA1731 | missense     | Subset1 | DCIS-1   | 50   | 2   | 4    |
| chr11 | 93412579  | C | G | KIAA1731 | missense     | Subset1 | DCIS-3   | 56   | 4   | 7.1  |
| chr11 | 93412579  | C | G | KIAA1731 | missense     | Subset1 | DCIS-6   | 10   | 3   | 30   |
| chr11 | 93412579  | C | G | KIAA1731 | missense     | Subset1 | DCIS-8   | 52   | 6   | 11.5 |
| chr11 | 93412579  | C | G | KIAA1731 | missense     | Subset1 | InvF-5   | 6    | 2   | 33.3 |
| chr11 | 93412579  | C | G | KIAA1731 | missense     | Subset1 | InvF-1   | 14   | 4   | 28.5 |
| chr11 | 93412579  | C | G | KIAA1731 | missense     | Subset1 | InvF-9   | 247  | 188 | 76.1 |
| chr11 | 93412579  | C | G | KIAA1731 | missense     | Subset1 | MeD-2    | 41   | 4   | 9.7  |

|       |           |   |   |          |              |         |          |     |     |      |
|-------|-----------|---|---|----------|--------------|---------|----------|-----|-----|------|
| chr11 | 93412579  | C | G | KIAA1731 | missense     | Subset1 | MeD-4    | 83  | 9   | 10.8 |
| chr11 | 93412579  | C | G | KIAA1731 | missense     | Subset1 | MeD-8    | 78  | 14  | 17.9 |
| chr11 | 93412579  | C | G | KIAA1731 | missense     | Subset1 | MeD-9    | 139 | 20  | 14.3 |
| chr11 | 93412579  | C | G | KIAA1731 | missense     | Subset1 | M-DCIS-8 | 433 | 306 | 70.6 |
| chr11 | 93412579  | C | G | KIAA1731 | missense     | Subset1 | S1-11    | 264 | 49  | 18.5 |
| chr11 | 93412579  | C | G | KIAA1731 | missense     | Subset1 | S3-13    | 70  | 8   | 11.4 |
| chr11 | 93412579  | C | G | KIAA1731 | missense     | Subset1 | S3-7     | 77  | 33  | 42.8 |
| chr11 | 93412579  | C | G | KIAA1731 | missense     | Subset1 | S1-1     | 6   | 2   | 33.3 |
| chr11 | 93412579  | C | G | KIAA1731 | missense     | Subset1 | S1-12    | 123 | 3   | 2.4  |
| chr11 | 93412579  | C | G | KIAA1731 | missense     | Subset1 | S2-13    | 29  | 2   | 6.8  |
| chr11 | 93412579  | C | G | KIAA1731 | missense     | Subset1 | S2-5     | 96  | 8   | 8.3  |
| chr10 | 24893265  | G | A | ARHGAP21 | coding-synon | Subset3 | MeP-12   | 21  | 2   | 9.5  |
| chr10 | 24893265  | G | A | ARHGAP21 | coding-synon | Subset3 | DCIS-1   | 21  | 2   | 9.5  |
| chr10 | 24893265  | G | A | ARHGAP21 | coding-synon | Subset3 | InvF-11  | 30  | 2   | 6.6  |
| chr10 | 24893265  | G | A | ARHGAP21 | coding-synon | Subset3 | Ly-10    | 34  | 2   | 5.8  |
| chr10 | 24893265  | G | A | ARHGAP21 | coding-synon | Subset3 | MeD-2    | 53  | 6   | 11.3 |
| chr10 | 24893265  | G | A | ARHGAP21 | coding-synon | Subset3 | MeD-9    | 28  | 2   | 7.1  |
| chr10 | 24893265  | G | A | ARHGAP21 | coding-synon | Subset3 | BN-4     | 159 | 7   | 4.4  |
| chr1  | 171956880 | G | A | DNM3     | missense     | Subset1 | MeC-2    | 583 | 14  | 2.4  |
| chr1  | 171956880 | G | A | DNM3     | missense     | Subset1 | MeC-11   | 12  | 4   | 33.3 |
| chr1  | 171956880 | G | A | DNM3     | missense     | Subset1 | MeC-3    | 195 | 11  | 5.6  |
| chr1  | 171956880 | G | A | DNM3     | missense     | Subset1 | MeC-4    | 154 | 58  | 37.6 |
| chr1  | 171956880 | G | A | DNM3     | missense     | Subset1 | MeC-5    | 29  | 7   | 24.1 |
| chr1  | 171956880 | G | A | DNM3     | missense     | Subset1 | MeP-1    | 11  | 4   | 36.3 |
| chr1  | 171956880 | G | A | DNM3     | missense     | Subset1 | MeP-4    | 98  | 15  | 15.3 |
| chr1  | 171956880 | G | A | DNM3     | missense     | Subset1 | MeP-5    | 15  | 7   | 46.6 |
| chr1  | 171956880 | G | A | DNM3     | missense     | Subset1 | MeP-6    | 170 | 54  | 31.7 |
| chr1  | 171956880 | G | A | DNM3     | missense     | Subset1 | DCIS-1   | 49  | 4   | 8.1  |
| chr1  | 171956880 | G | A | DNM3     | missense     | Subset1 | DCIS-6   | 37  | 4   | 10.8 |
| chr1  | 171956880 | G | A | DNM3     | missense     | Subset1 | InvF-10  | 275 | 35  | 12.7 |
| chr1  | 171956880 | G | A | DNM3     | missense     | Subset1 | InvF-5   | 308 | 193 | 62.6 |
| chr1  | 171956880 | G | A | DNM3     | missense     | Subset1 | InvF-1   | 88  | 2   | 2.2  |
| chr1  | 171956880 | G | A | DNM3     | missense     | Subset1 | InvF-9   | 80  | 3   | 3.7  |
| chr1  | 171956880 | G | A | DNM3     | missense     | Subset1 | MeD-2    | 107 | 4   | 3.7  |
| chr1  | 171956880 | G | A | DNM3     | missense     | Subset1 | MeD-4    | 90  | 2   | 2.2  |
| chr1  | 171956880 | G | A | DNM3     | missense     | Subset1 | MeD-7    | 141 | 35  | 24.8 |
| chr1  | 171956880 | G | A | DNM3     | missense     | Subset1 | MeD-8    | 96  | 19  | 19.7 |
| chr1  | 171956880 | G | A | DNM3     | missense     | Subset1 | MeD-9    | 128 | 26  | 20.3 |
| chr1  | 171956880 | G | A | DNM3     | missense     | Subset1 | M-DCIS-2 | 80  | 7   | 8.7  |
| chr1  | 171956880 | G | A | DNM3     | missense     | Subset1 | S1-11    | 471 | 53  | 11.2 |
| chr1  | 171956880 | G | A | DNM3     | missense     | Subset1 | S3-2     | 366 | 55  | 15   |
| chr1  | 171956880 | G | A | DNM3     | missense     | Subset1 | S3-13    | 43  | 5   | 11.6 |
| chr1  | 171956880 | G | A | DNM3     | missense     | Subset1 | S3-3     | 124 | 28  | 22.5 |
| chr1  | 171956880 | G | A | DNM3     | missense     | Subset1 | S3-7     | 99  | 12  | 12.1 |
| chr1  | 171956880 | G | A | DNM3     | missense     | Subset1 | S1-1     | 24  | 2   | 8.3  |
| chr1  | 171956880 | G | A | DNM3     | missense     | Subset1 | S2-8     | 25  | 10  | 40   |
| chr2  | 175213669 | G | A | CIR1     | coding-synon | Subset3 | MeC-2    | 79  | 6   | 7.5  |
| chr2  | 175213669 | G | A | CIR1     | coding-synon | Subset3 | MeC-3    | 137 | 7   | 5.1  |
| chr2  | 175213669 | G | A | CIR1     | coding-synon | Subset3 | DCIS-1   | 66  | 3   | 4.5  |
| chr2  | 175213669 | G | A | CIR1     | coding-synon | Subset3 | DCIS-3   | 57  | 10  | 17.5 |
| chr2  | 175213669 | G | A | CIR1     | coding-synon | Subset3 | M-DCIS-3 | 10  | 9   | 90   |
| chr2  | 175213669 | G | A | CIR1     | coding-synon | Subset3 | M-DCIS-4 | 31  | 2   | 6.4  |
| chr2  | 175213669 | G | A | CIR1     | coding-synon | Subset3 | M-DCIS-5 | 54  | 8   | 14.8 |
| chr2  | 175213669 | G | A | CIR1     | coding-synon | Subset3 | S1-11    | 173 | 3   | 1.7  |
| chr2  | 175213669 | G | A | CIR1     | coding-synon | Subset3 | S2-2     | 4   | 2   | 50   |

|      |           |   |   |         |              |         |          |     |     |      |
|------|-----------|---|---|---------|--------------|---------|----------|-----|-----|------|
| chr2 | 175213669 | G | A | CIR1    | coding-synon | Subset3 | S2-4     | 25  | 3   | 12   |
| chr1 | 236646875 | G | C | EDARADD | utr-3        | Subset1 | MeC-1    | 35  | 7   | 20   |
| chr1 | 236646875 | G | C | EDARADD | utr-3        | Subset1 | MeC-20   | 7   | 2   | 28.5 |
| chr1 | 236646875 | G | C | EDARADD | utr-3        | Subset1 | MeC-4    | 265 | 164 | 61.8 |
| chr1 | 236646875 | G | C | EDARADD | utr-3        | Subset1 | MeC-5    | 16  | 13  | 81.2 |
| chr1 | 236646875 | G | C | EDARADD | utr-3        | Subset1 | MeC-8    | 137 | 11  | 8    |
| chr1 | 236646875 | G | C | EDARADD | utr-3        | Subset1 | MeP-1    | 30  | 2   | 6.6  |
| chr1 | 236646875 | G | C | EDARADD | utr-3        | Subset1 | MeP-18   | 57  | 14  | 24.5 |
| chr1 | 236646875 | G | C | EDARADD | utr-3        | Subset1 | MeP-4    | 177 | 51  | 28.8 |
| chr1 | 236646875 | G | C | EDARADD | utr-3        | Subset1 | MeP-6    | 76  | 12  | 15.7 |
| chr1 | 236646875 | G | C | EDARADD | utr-3        | Subset1 | DCIS-1   | 115 | 2   | 1.7  |
| chr1 | 236646875 | G | C | EDARADD | utr-3        | Subset1 | DCIS-2   | 53  | 6   | 11.3 |
| chr1 | 236646875 | G | C | EDARADD | utr-3        | Subset1 | DCIS-6   | 221 | 4   | 1.8  |
| chr1 | 236646875 | G | C | EDARADD | utr-3        | Subset1 | DCIS-8   | 70  | 2   | 2.8  |
| chr1 | 236646875 | G | C | EDARADD | utr-3        | Subset1 | InvF-5   | 21  | 10  | 47.6 |
| chr1 | 236646875 | G | C | EDARADD | utr-3        | Subset1 | InvF-1   | 102 | 21  | 20.5 |
| chr1 | 236646875 | G | C | EDARADD | utr-3        | Subset1 | InvF-13  | 9   | 3   | 33.3 |
| chr1 | 236646875 | G | C | EDARADD | utr-3        | Subset1 | InvF-9   | 557 | 416 | 74.6 |
| chr1 | 236646875 | G | C | EDARADD | utr-3        | Subset1 | MeD-2    | 101 | 23  | 22.7 |
| chr1 | 236646875 | G | C | EDARADD | utr-3        | Subset1 | MeD-7    | 202 | 61  | 30.1 |
| chr1 | 236646875 | G | C | EDARADD | utr-3        | Subset1 | MeD-8    | 182 | 12  | 6.5  |
| chr1 | 236646875 | G | C | EDARADD | utr-3        | Subset1 | MeD-9    | 179 | 18  | 10   |
| chr1 | 236646875 | G | C | EDARADD | utr-3        | Subset1 | S1-11    | 300 | 38  | 12.6 |
| chr1 | 236646875 | G | C | EDARADD | utr-3        | Subset1 | S3-13    | 322 | 20  | 6.2  |
| chr1 | 236646875 | G | C | EDARADD | utr-3        | Subset1 | S3-3     | 123 | 60  | 48.7 |
| chr1 | 236646875 | G | C | EDARADD | utr-3        | Subset1 | S3-7     | 74  | 12  | 16.2 |
| chr1 | 236646875 | G | C | EDARADD | utr-3        | Subset1 | S1-2     | 109 | 2   | 1.8  |
| chr1 | 236646875 | G | C | EDARADD | utr-3        | Subset1 | S1-9     | 12  | 3   | 25   |
| chr9 | 140657011 | G | A | EHMT1   | intron       | Subset1 | MeC-2    | 14  | 2   | 14.2 |
| chr9 | 140657011 | G | A | EHMT1   | intron       | Subset1 | MeC-1    | 11  | 5   | 45.4 |
| chr9 | 140657011 | G | A | EHMT1   | intron       | Subset1 | MeC-10   | 414 | 413 | 99.7 |
| chr9 | 140657011 | G | A | EHMT1   | intron       | Subset1 | MeC-3    | 141 | 17  | 12   |
| chr9 | 140657011 | G | A | EHMT1   | intron       | Subset1 | MeC-4    | 119 | 48  | 40.3 |
| chr9 | 140657011 | G | A | EHMT1   | intron       | Subset1 | MeC-5    | 7   | 2   | 28.5 |
| chr9 | 140657011 | G | A | EHMT1   | intron       | Subset1 | MeP-1    | 32  | 9   | 28.1 |
| chr9 | 140657011 | G | A | EHMT1   | intron       | Subset1 | MeP-4    | 79  | 20  | 25.3 |
| chr9 | 140657011 | G | A | EHMT1   | intron       | Subset1 | MeP-6    | 53  | 8   | 15   |
| chr9 | 140657011 | G | A | EHMT1   | intron       | Subset1 | DCIS-1   | 89  | 6   | 6.7  |
| chr9 | 140657011 | G | A | EHMT1   | intron       | Subset1 | DCIS-5   | 9   | 6   | 66.6 |
| chr9 | 140657011 | G | A | EHMT1   | intron       | Subset1 | DCIS-6   | 80  | 2   | 2.5  |
| chr9 | 140657011 | G | A | EHMT1   | intron       | Subset1 | DCIS-8   | 40  | 18  | 45   |
| chr9 | 140657011 | G | A | EHMT1   | intron       | Subset1 | InvF-10  | 34  | 2   | 5.8  |
| chr9 | 140657011 | G | A | EHMT1   | intron       | Subset1 | InvF-5   | 78  | 25  | 32   |
| chr9 | 140657011 | G | A | EHMT1   | intron       | Subset1 | InvF-1   | 49  | 10  | 20.4 |
| chr9 | 140657011 | G | A | EHMT1   | intron       | Subset1 | InvF-12  | 85  | 62  | 72.9 |
| chr9 | 140657011 | G | A | EHMT1   | intron       | Subset1 | InvF-13  | 32  | 31  | 96.8 |
| chr9 | 140657011 | G | A | EHMT1   | intron       | Subset1 | InvF-9   | 55  | 50  | 90.9 |
| chr9 | 140657011 | G | A | EHMT1   | intron       | Subset1 | MeD-2    | 77  | 20  | 25.9 |
| chr9 | 140657011 | G | A | EHMT1   | intron       | Subset1 | MeD-7    | 249 | 19  | 7.6  |
| chr9 | 140657011 | G | A | EHMT1   | intron       | Subset1 | MeD-8    | 107 | 87  | 81.3 |
| chr9 | 140657011 | G | A | EHMT1   | intron       | Subset1 | MeD-9    | 95  | 65  | 68.4 |
| chr9 | 140657011 | G | A | EHMT1   | intron       | Subset1 | M-DCIS-1 | 18  | 2   | 11.1 |
| chr9 | 140657011 | G | A | EHMT1   | intron       | Subset1 | M-DCIS-5 | 40  | 2   | 5    |
| chr9 | 140657011 | G | A | EHMT1   | intron       | Subset1 | S1-11    | 99  | 39  | 39.3 |
| chr9 | 140657011 | G | A | EHMT1   | intron       | Subset1 | S3-2     | 66  | 29  | 43.9 |

|       |           |   |   |        |              |         |         |     |     |      |
|-------|-----------|---|---|--------|--------------|---------|---------|-----|-----|------|
| chr9  | 140657011 | G | A | EHMT1  | intron       | Subset1 | S3-7    | 12  | 3   | 25   |
| chr9  | 140657011 | G | A | EHMT1  | intron       | Subset1 | S1-2    | 8   | 4   | 50   |
| chr9  | 140657011 | G | A | EHMT1  | intron       | Subset1 | S2-14   | 42  | 12  | 28.5 |
| chr9  | 140657011 | G | A | EHMT1  | intron       | Subset1 | S2-4    | 281 | 3   | 1    |
| chr20 | 47309328  | C | T | PREX1  | coding-synon | Subset2 | S1-11   | 188 | 2   | 1    |
| chr20 | 47309328  | C | T | PREX1  | coding-synon | Subset2 | BN-5    | 136 | 13  | 9.5  |
| chr20 | 47309328  | C | T | PREX1  | coding-synon | Subset2 | BN-11   | 59  | 8   | 13.5 |
| chrX  | 149984601 | A | T | CD99L2 | intron       | Subset1 | MeC-2   | 25  | 19  | 76   |
| chrX  | 149984601 | A | T | CD99L2 | intron       | Subset1 | MeP-2   | 307 | 169 | 55   |
| chrX  | 149984601 | A | T | CD99L2 | intron       | Subset1 | MeC-11  | 12  | 11  | 91.6 |
| chrX  | 149984601 | A | T | CD99L2 | intron       | Subset1 | MeC-3   | 6   | 3   | 50   |
| chrX  | 149984601 | A | T | CD99L2 | intron       | Subset1 | MeC-4   | 33  | 16  | 48.4 |
| chrX  | 149984601 | A | T | CD99L2 | intron       | Subset1 | MeP-17  | 142 | 140 | 98.5 |
| chrX  | 149984601 | A | T | CD99L2 | intron       | Subset1 | MeP-4   | 38  | 26  | 68.4 |
| chrX  | 149984601 | A | T | CD99L2 | intron       | Subset1 | MeP-5   | 12  | 3   | 25   |
| chrX  | 149984601 | A | T | CD99L2 | intron       | Subset1 | MeP-6   | 43  | 4   | 9.3  |
| chrX  | 149984601 | A | T | CD99L2 | intron       | Subset1 | DCIS-1  | 98  | 3   | 3    |
| chrX  | 149984601 | A | T | CD99L2 | intron       | Subset1 | DCIS-3  | 22  | 2   | 9    |
| chrX  | 149984601 | A | T | CD99L2 | intron       | Subset1 | DCIS-8  | 50  | 2   | 4    |
| chrX  | 149984601 | A | T | CD99L2 | intron       | Subset1 | InvF-10 | 253 | 70  | 27.6 |
| chrX  | 149984601 | A | T | CD99L2 | intron       | Subset1 | InvF-4  | 388 | 368 | 94.8 |
| chrX  | 149984601 | A | T | CD99L2 | intron       | Subset1 | InvF-5  | 660 | 591 | 89.5 |
| chrX  | 149984601 | A | T | CD99L2 | intron       | Subset1 | InvF-11 | 67  | 2   | 2.9  |
| chrX  | 149984601 | A | T | CD99L2 | intron       | Subset1 | InvF-13 | 25  | 25  | 100  |
| chrX  | 149984601 | A | T | CD99L2 | intron       | Subset1 | InvF-9  | 256 | 4   | 1.5  |
| chrX  | 149984601 | A | T | CD99L2 | intron       | Subset1 | MeD-2   | 78  | 6   | 7.6  |
| chrX  | 149984601 | A | T | CD99L2 | intron       | Subset1 | MeD-4   | 110 | 5   | 4.5  |
| chrX  | 149984601 | A | T | CD99L2 | intron       | Subset1 | MeD-7   | 65  | 3   | 4.6  |
| chrX  | 149984601 | A | T | CD99L2 | intron       | Subset1 | MeD-8   | 78  | 12  | 15.3 |
| chrX  | 149984601 | A | T | CD99L2 | intron       | Subset1 | MeD-9   | 290 | 75  | 25.8 |
| chrX  | 149984601 | A | T | CD99L2 | intron       | Subset1 | S1-11   | 151 | 54  | 35.7 |
| chrX  | 149984601 | A | T | CD99L2 | intron       | Subset1 | S3-2    | 410 | 43  | 10.4 |
| chrX  | 149984601 | A | T | CD99L2 | intron       | Subset1 | S3-13   | 81  | 2   | 2.4  |
| chrX  | 149984601 | A | T | CD99L2 | intron       | Subset1 | S3-3    | 40  | 4   | 10   |
| chrX  | 149984601 | A | T | CD99L2 | intron       | Subset1 | S3-7    | 83  | 83  | 100  |
| chrX  | 149984601 | A | T | CD99L2 | intron       | Subset1 | S1-12   | 23  | 3   | 13   |
| chrX  | 149984601 | A | T | CD99L2 | intron       | Subset1 | S1-2    | 88  | 6   | 6.8  |
| chr5  | 133997269 | A | C | SEC24A | coding-synon | Subset1 | MeC-2   | 137 | 68  | 49.6 |
| chr5  | 133997269 | A | C | SEC24A | coding-synon | Subset1 | MeP-2   | 315 | 18  | 5.7  |
| chr5  | 133997269 | A | C | SEC24A | coding-synon | Subset1 | MeC-3   | 156 | 11  | 7    |
| chr5  | 133997269 | A | C | SEC24A | coding-synon | Subset1 | MeC-4   | 156 | 84  | 53.8 |
| chr5  | 133997269 | A | C | SEC24A | coding-synon | Subset1 | MeC-5   | 40  | 10  | 25   |
| chr5  | 133997269 | A | C | SEC24A | coding-synon | Subset1 | MeC-8   | 82  | 4   | 4.8  |
| chr5  | 133997269 | A | C | SEC24A | coding-synon | Subset1 | MeP-12  | 477 | 31  | 6.4  |
| chr5  | 133997269 | A | C | SEC24A | coding-synon | Subset1 | MeP-4   | 197 | 90  | 45.6 |
| chr5  | 133997269 | A | C | SEC24A | coding-synon | Subset1 | MeP-6   | 94  | 43  | 45.7 |
| chr5  | 133997269 | A | C | SEC24A | coding-synon | Subset1 | DCIS-1  | 59  | 11  | 18.6 |
| chr5  | 133997269 | A | C | SEC24A | coding-synon | Subset1 | DCIS-2  | 90  | 3   | 3.3  |
| chr5  | 133997269 | A | C | SEC24A | coding-synon | Subset1 | DCIS-3  | 106 | 78  | 73.5 |
| chr5  | 133997269 | A | C | SEC24A | coding-synon | Subset1 | DCIS-5  | 120 | 115 | 95.8 |
| chr5  | 133997269 | A | C | SEC24A | coding-synon | Subset1 | DCIS-8  | 49  | 10  | 20.4 |
| chr5  | 133997269 | A | C | SEC24A | coding-synon | Subset1 | InvF-11 | 114 | 6   | 5.2  |
| chr5  | 133997269 | A | C | SEC24A | coding-synon | Subset1 | InvF-12 | 4   | 4   | 100  |
| chr5  | 133997269 | A | C | SEC24A | coding-synon | Subset1 | InvF-13 | 31  | 3   | 9.6  |
| chr5  | 133997269 | A | C | SEC24A | coding-synon | Subset1 | InvF-9  | 82  | 7   | 8.5  |

|       |           |   |   |        |              |         |          |     |     |      |
|-------|-----------|---|---|--------|--------------|---------|----------|-----|-----|------|
| chr5  | 133997269 | A | C | SEC24A | coding-synon | Subset1 | MeD-2    | 47  | 7   | 14.8 |
| chr5  | 133997269 | A | C | SEC24A | coding-synon | Subset1 | MeD-4    | 57  | 4   | 7    |
| chr5  | 133997269 | A | C | SEC24A | coding-synon | Subset1 | MeD-7    | 94  | 30  | 31.9 |
| chr5  | 133997269 | A | C | SEC24A | coding-synon | Subset1 | MeD-8    | 44  | 7   | 15.9 |
| chr5  | 133997269 | A | C | SEC24A | coding-synon | Subset1 | MeD-9    | 104 | 40  | 38.4 |
| chr5  | 133997269 | A | C | SEC24A | coding-synon | Subset1 | M-DCIS-1 | 82  | 10  | 12.1 |
| chr5  | 133997269 | A | C | SEC24A | coding-synon | Subset1 | M-DCIS-8 | 16  | 5   | 31.2 |
| chr5  | 133997269 | A | C | SEC24A | coding-synon | Subset1 | M-DCIS-2 | 122 | 45  | 36.8 |
| chr5  | 133997269 | A | C | SEC24A | coding-synon | Subset1 | M-DCIS-5 | 35  | 2   | 5.7  |
| chr5  | 133997269 | A | C | SEC24A | coding-synon | Subset1 | S1-11    | 254 | 57  | 22.4 |
| chr5  | 133997269 | A | C | SEC24A | coding-synon | Subset1 | S3-13    | 82  | 4   | 4.8  |
| chr5  | 133997269 | A | C | SEC24A | coding-synon | Subset1 | S3-3     | 24  | 2   | 8.3  |
| chr5  | 133997269 | A | C | SEC24A | coding-synon | Subset1 | S3-7     | 22  | 9   | 40.9 |
| chr5  | 133997269 | A | C | SEC24A | coding-synon | Subset1 | S1-1     | 289 | 70  | 24.2 |
| chr5  | 133997269 | A | C | SEC24A | coding-synon | Subset1 | S1-2     | 31  | 10  | 32.2 |
| chr5  | 133997269 | A | C | SEC24A | coding-synon | Subset1 | S1-6     | 87  | 11  | 12.6 |
| chr5  | 133997269 | A | C | SEC24A | coding-synon | Subset1 | S1-9     | 74  | 3   | 4    |
| chr5  | 133997269 | A | C | SEC24A | coding-synon | Subset1 | S2-14    | 131 | 20  | 15.2 |
| chr9  | 3270833   | C | A | RFX3   | intron       | Subset1 | MeC-2    | 165 | 21  | 12.7 |
| chr9  | 3270833   | C | A | RFX3   | intron       | Subset1 | MeP-2    | 154 | 10  | 6.4  |
| chr9  | 3270833   | C | A | RFX3   | intron       | Subset1 | MeC-1    | 3   | 3   | 100  |
| chr9  | 3270833   | C | A | RFX3   | intron       | Subset1 | MeC-11   | 5   | 2   | 40   |
| chr9  | 3270833   | C | A | RFX3   | intron       | Subset1 | MeC-3    | 38  | 30  | 78.9 |
| chr9  | 3270833   | C | A | RFX3   | intron       | Subset1 | MeC-4    | 34  | 6   | 17.6 |
| chr9  | 3270833   | C | A | RFX3   | intron       | Subset1 | MeC-5    | 17  | 16  | 94.1 |
| chr9  | 3270833   | C | A | RFX3   | intron       | Subset1 | MeC-8    | 24  | 5   | 20.8 |
| chr9  | 3270833   | C | A | RFX3   | intron       | Subset1 | MeP-4    | 65  | 55  | 84.6 |
| chr9  | 3270833   | C | A | RFX3   | intron       | Subset1 | MeP-6    | 108 | 81  | 75   |
| chr9  | 3270833   | C | A | RFX3   | intron       | Subset1 | DCIS-2   | 38  | 2   | 5.2  |
| chr9  | 3270833   | C | A | RFX3   | intron       | Subset1 | DCIS-6   | 20  | 12  | 60   |
| chr9  | 3270833   | C | A | RFX3   | intron       | Subset1 | MeD-2    | 82  | 10  | 12.1 |
| chr9  | 3270833   | C | A | RFX3   | intron       | Subset1 | MeD-4    | 112 | 9   | 8    |
| chr9  | 3270833   | C | A | RFX3   | intron       | Subset1 | MeD-7    | 139 | 16  | 11.5 |
| chr9  | 3270833   | C | A | RFX3   | intron       | Subset1 | MeD-8    | 140 | 16  | 11.4 |
| chr9  | 3270833   | C | A | RFX3   | intron       | Subset1 | MeD-9    | 99  | 83  | 83.8 |
| chr9  | 3270833   | C | A | RFX3   | intron       | Subset1 | S1-11    | 118 | 28  | 23.7 |
| chr9  | 3270833   | C | A | RFX3   | intron       | Subset1 | S3-13    | 93  | 40  | 43   |
| chr9  | 3270833   | C | A | RFX3   | intron       | Subset1 | S3-3     | 34  | 7   | 20.5 |
| chr9  | 3270833   | C | A | RFX3   | intron       | Subset1 | S3-7     | 39  | 7   | 17.9 |
| chr9  | 3270833   | C | A | RFX3   | intron       | Subset1 | S2-7     | 137 | 65  | 47.4 |
| chr19 | 36940733  | G | T | ZNF566 | missense     | Subset1 | MeC-2    | 206 | 176 | 85.4 |
| chr19 | 36940733  | G | T | ZNF566 | missense     | Subset1 | MeP-2    | 214 | 109 | 50.9 |
| chr19 | 36940733  | G | T | ZNF566 | missense     | Subset1 | MeC-10   | 89  | 21  | 23.5 |
| chr19 | 36940733  | G | T | ZNF566 | missense     | Subset1 | MeC-4    | 315 | 20  | 6.3  |
| chr19 | 36940733  | G | T | ZNF566 | missense     | Subset1 | MeP-4    | 64  | 12  | 18.7 |
| chr19 | 36940733  | G | T | ZNF566 | missense     | Subset1 | MeP-6    | 71  | 18  | 25.3 |
| chr19 | 36940733  | G | T | ZNF566 | missense     | Subset1 | DCIS-3   | 67  | 10  | 14.9 |
| chr19 | 36940733  | G | T | ZNF566 | missense     | Subset1 | DCIS-8   | 85  | 13  | 15.2 |
| chr19 | 36940733  | G | T | ZNF566 | missense     | Subset1 | InvF-10  | 226 | 22  | 9.7  |
| chr19 | 36940733  | G | T | ZNF566 | missense     | Subset1 | InvF-4   | 102 | 72  | 70.5 |
| chr19 | 36940733  | G | T | ZNF566 | missense     | Subset1 | InvF-5   | 108 | 104 | 96.2 |
| chr19 | 36940733  | G | T | ZNF566 | missense     | Subset1 | InvF-1   | 113 | 4   | 3.5  |
| chr19 | 36940733  | G | T | ZNF566 | missense     | Subset1 | InvF-9   | 70  | 61  | 87.1 |
| chr19 | 36940733  | G | T | ZNF566 | missense     | Subset1 | MeD-2    | 61  | 14  | 22.9 |
| chr19 | 36940733  | G | T | ZNF566 | missense     | Subset1 | MeD-4    | 117 | 2   | 1.7  |

|       |           |   |   |        |              |         |          |      |      |      |
|-------|-----------|---|---|--------|--------------|---------|----------|------|------|------|
| chr19 | 36940733  | G | T | ZNF566 | missense     | Subset1 | MeD-7    | 130  | 4    | 3    |
| chr19 | 36940733  | G | T | ZNF566 | missense     | Subset1 | MeD-8    | 112  | 32   | 28.5 |
| chr19 | 36940733  | G | T | ZNF566 | missense     | Subset1 | MeD-9    | 150  | 88   | 58.6 |
| chr19 | 36940733  | G | T | ZNF566 | missense     | Subset1 | M-DCIS-2 | 87   | 8    | 9.1  |
| chr19 | 36940733  | G | T | ZNF566 | missense     | Subset1 | M-DCIS-3 | 15   | 15   | 100  |
| chr19 | 36940733  | G | T | ZNF566 | missense     | Subset1 | S1-11    | 456  | 196  | 42.9 |
| chr19 | 36940733  | G | T | ZNF566 | missense     | Subset1 | S3-2     | 344  | 31   | 9    |
| chr19 | 36940733  | G | T | ZNF566 | missense     | Subset1 | S3-13    | 102  | 38   | 37.2 |
| chr19 | 36940733  | G | T | ZNF566 | missense     | Subset1 | S3-3     | 217  | 4    | 1.8  |
| chr19 | 36940733  | G | T | ZNF566 | missense     | Subset1 | S3-7     | 76   | 2    | 2.6  |
| chr19 | 36940733  | G | T | ZNF566 | missense     | Subset1 | S1-6     | 82   | 9    | 10.9 |
| chr19 | 36940733  | G | T | ZNF566 | missense     | Subset1 | S1-9     | 24   | 9    | 37.5 |
| chr19 | 36940733  | G | T | ZNF566 | missense     | Subset1 | S2-14    | 120  | 27   | 22.5 |
| chr19 | 36940733  | G | T | ZNF566 | missense     | Subset1 | S2-13    | 95   | 88   | 92.6 |
| chr1  | 150956791 | G | A | ANXA9  | missense     | Subset3 | S1-2     | 90   | 4    | 4.4  |
| chr1  | 150956791 | G | A | ANXA9  | missense     | Subset3 | BN-15    | 224  | 4    | 1.7  |
| chrX  | 48792335  | G | C | OTUD5  | intron       | Subset3 | MeC-1    | 135  | 2    | 1.4  |
| chrX  | 48792335  | G | C | OTUD5  | intron       | Subset3 | MeC-8    | 7    | 4    | 57.1 |
| chrX  | 48792335  | G | C | OTUD5  | intron       | Subset3 | MeP-1    | 64   | 3    | 4.6  |
| chrX  | 48792335  | G | C | OTUD5  | intron       | Subset3 | BN-8     | 4    | 3    | 75   |
| chrX  | 48792335  | G | C | OTUD5  | intron       | Subset3 | DCIS-2   | 88   | 54   | 61.3 |
| chrX  | 48792335  | G | C | OTUD5  | intron       | Subset3 | DCIS-3   | 69   | 4    | 5.7  |
| chrX  | 48792335  | G | C | OTUD5  | intron       | Subset3 | DCIS-8   | 67   | 5    | 7.4  |
| chrX  | 48792335  | G | C | OTUD5  | intron       | Subset3 | InvF-12  | 1743 | 1740 | 99.8 |
| chrX  | 48792335  | G | C | OTUD5  | intron       | Subset3 | InvF-8   | 25   | 3    | 12   |
| chrX  | 48792335  | G | C | OTUD5  | intron       | Subset3 | Ly-10    | 159  | 4    | 2.5  |
| chrX  | 48792335  | G | C | OTUD5  | intron       | Subset3 | MeD-4    | 183  | 6    | 3.2  |
| chrX  | 48792335  | G | C | OTUD5  | intron       | Subset3 | M-DCIS-5 | 88   | 6    | 6.8  |
| chrX  | 48792335  | G | C | OTUD5  | intron       | Subset3 | S3-13    | 452  | 5    | 1.1  |
| chrX  | 48792335  | G | C | OTUD5  | intron       | Subset3 | S3-3     | 368  | 13   | 3.5  |
| chrX  | 48792335  | G | C | OTUD5  | intron       | Subset3 | S1-2     | 170  | 5    | 2.9  |
| chrX  | 48792335  | G | C | OTUD5  | intron       | Subset3 | S1-6     | 218  | 36   | 16.5 |
| chrX  | 48792335  | G | C | OTUD5  | intron       | Subset3 | S2-10    | 109  | 8    | 7.3  |
| chrX  | 48792335  | G | C | OTUD5  | intron       | Subset3 | S2-14    | 695  | 35   | 5    |
| chrX  | 48792335  | G | C | OTUD5  | intron       | Subset3 | S2-2     | 417  | 333  | 79.8 |
| chrX  | 48792335  | G | C | OTUD5  | intron       | Subset3 | S2-4     | 303  | 5    | 1.6  |
| chr20 | 30897952  | C | T | KIF3B  | coding-synon | Subset1 | MeC-2    | 110  | 13   | 11.8 |
| chr20 | 30897952  | C | T | KIF3B  | coding-synon | Subset1 | MeC-1    | 4    | 2    | 50   |
| chr20 | 30897952  | C | T | KIF3B  | coding-synon | Subset1 | MeC-11   | 53   | 4    | 7.5  |
| chr20 | 30897952  | C | T | KIF3B  | coding-synon | Subset1 | MeC-3    | 48   | 20   | 41.6 |
| chr20 | 30897952  | C | T | KIF3B  | coding-synon | Subset1 | MeC-4    | 211  | 67   | 31.7 |
| chr20 | 30897952  | C | T | KIF3B  | coding-synon | Subset1 | MeC-5    | 34   | 2    | 5.8  |
| chr20 | 30897952  | C | T | KIF3B  | coding-synon | Subset1 | MeP-1    | 226  | 5    | 2.2  |
| chr20 | 30897952  | C | T | KIF3B  | coding-synon | Subset1 | MeP-18   | 29   | 3    | 10.3 |
| chr20 | 30897952  | C | T | KIF3B  | coding-synon | Subset1 | MeP-4    | 215  | 140  | 65.1 |
| chr20 | 30897952  | C | T | KIF3B  | coding-synon | Subset1 | MeP-6    | 185  | 131  | 70.8 |
| chr20 | 30897952  | C | T | KIF3B  | coding-synon | Subset1 | DCIS-1   | 79   | 8    | 10.1 |
| chr20 | 30897952  | C | T | KIF3B  | coding-synon | Subset1 | DCIS-2   | 184  | 121  | 65.7 |
| chr20 | 30897952  | C | T | KIF3B  | coding-synon | Subset1 | DCIS-3   | 236  | 10   | 4.2  |
| chr20 | 30897952  | C | T | KIF3B  | coding-synon | Subset1 | DCIS-5   | 37   | 26   | 70.2 |
| chr20 | 30897952  | C | T | KIF3B  | coding-synon | Subset1 | DCIS-6   | 751  | 97   | 12.9 |
| chr20 | 30897952  | C | T | KIF3B  | coding-synon | Subset1 | DCIS-8   | 94   | 10   | 10.6 |
| chr20 | 30897952  | C | T | KIF3B  | coding-synon | Subset1 | InvF-10  | 228  | 70   | 30.7 |
| chr20 | 30897952  | C | T | KIF3B  | coding-synon | Subset1 | InvF-4   | 129  | 15   | 11.6 |
| chr20 | 30897952  | C | T | KIF3B  | coding-synon | Subset1 | InvF-5   | 503  | 295  | 58.6 |

|       |           |   |   |         |              |         |          |     |     |      |
|-------|-----------|---|---|---------|--------------|---------|----------|-----|-----|------|
| chr20 | 30897952  | C | T | KIF3B   | coding-synon | Subset1 | InvF-1   | 53  | 17  | 32   |
| chr20 | 30897952  | C | T | KIF3B   | coding-synon | Subset1 | InvF-13  | 226 | 219 | 96.9 |
| chr20 | 30897952  | C | T | KIF3B   | coding-synon | Subset1 | InvF-9   | 41  | 4   | 9.7  |
| chr20 | 30897952  | C | T | KIF3B   | coding-synon | Subset1 | MeD-2    | 95  | 5   | 5.2  |
| chr20 | 30897952  | C | T | KIF3B   | coding-synon | Subset1 | MeD-4    | 174 | 7   | 4    |
| chr20 | 30897952  | C | T | KIF3B   | coding-synon | Subset1 | MeD-7    | 374 | 43  | 11.4 |
| chr20 | 30897952  | C | T | KIF3B   | coding-synon | Subset1 | MeD-8    | 194 | 37  | 19   |
| chr20 | 30897952  | C | T | KIF3B   | coding-synon | Subset1 | MeD-9    | 116 | 45  | 38.7 |
| chr20 | 30897952  | C | T | KIF3B   | coding-synon | Subset1 | M-DCIS-1 | 117 | 9   | 7.6  |
| chr20 | 30897952  | C | T | KIF3B   | coding-synon | Subset1 | M-DCIS-2 | 98  | 4   | 4    |
| chr20 | 30897952  | C | T | KIF3B   | coding-synon | Subset1 | M-DCIS-5 | 116 | 6   | 5.1  |
| chr20 | 30897952  | C | T | KIF3B   | coding-synon | Subset1 | S1-11    | 198 | 68  | 34.3 |
| chr20 | 30897952  | C | T | KIF3B   | coding-synon | Subset1 | S3-2     | 758 | 255 | 33.6 |
| chr20 | 30897952  | C | T | KIF3B   | coding-synon | Subset1 | S3-13    | 197 | 3   | 1.5  |
| chr20 | 30897952  | C | T | KIF3B   | coding-synon | Subset1 | S3-3     | 297 | 50  | 16.8 |
| chr20 | 30897952  | C | T | KIF3B   | coding-synon | Subset1 | S3-7     | 131 | 14  | 10.6 |
| chr20 | 30897952  | C | T | KIF3B   | coding-synon | Subset1 | S1-2     | 76  | 2   | 2.6  |
| chr20 | 30897952  | C | T | KIF3B   | coding-synon | Subset1 | S2-13    | 16  | 2   | 12.5 |
| chr20 | 30897952  | C | T | KIF3B   | coding-synon | Subset1 | S2-5     | 961 | 776 | 80.7 |
| chr3  | 120764358 | A | T | STXBP5L | missense     | Subset3 | MeC-2    | 120 | 2   | 1.6  |
| chr3  | 120764358 | A | T | STXBP5L | missense     | Subset3 | DCIS-1   | 61  | 5   | 8.1  |
| chr3  | 120764358 | A | T | STXBP5L | missense     | Subset3 | DCIS-3   | 45  | 4   | 8.8  |
| chr3  | 120764358 | A | T | STXBP5L | missense     | Subset3 | DCIS-8   | 68  | 4   | 5.8  |
| chr3  | 120764358 | A | T | STXBP5L | missense     | Subset3 | Ly-10    | 134 | 2   | 1.4  |
| chr3  | 120764358 | A | T | STXBP5L | missense     | Subset3 | MeD-2    | 155 | 19  | 12.2 |
| chr3  | 120764358 | A | T | STXBP5L | missense     | Subset3 | MeD-4    | 135 | 14  | 10.3 |
| chr3  | 120764358 | A | T | STXBP5L | missense     | Subset3 | M-DCIS-8 | 22  | 15  | 68.1 |
| chr3  | 120764358 | A | T | STXBP5L | missense     | Subset3 | S1-11    | 267 | 3   | 1.1  |
| chr3  | 120764358 | A | T | STXBP5L | missense     | Subset3 | S2-4     | 106 | 9   | 8.4  |
| chr3  | 120764358 | A | T | STXBP5L | missense     | Subset3 | BN-15    | 23  | 2   | 8.6  |
| chr6  | 26427877  | C | G | .       | .            | Subset2 | BN-13    | 158 | 5   | 3.1  |
| chr6  | 26427877  | C | G | .       | .            | Subset2 | BN-4     | 23  | 3   | 13   |
| chr6  | 26427877  | C | G | .       | .            | Subset2 | BN-11    | 3   | 3   | 100  |
| chr6  | 26427877  | C | G | .       | .            | Subset2 | BNM-3    | 12  | 3   | 25   |
| chr9  | 80923397  | G | A | PSAT1   | missense     | Subset2 | S2-7     | 102 | 2   | 1.9  |
| chr9  | 80923397  | G | A | PSAT1   | missense     | Subset2 | BNM-1    | 19  | 4   | 21   |
| chr9  | 80923397  | G | A | PSAT1   | missense     | Subset2 | BNM-2    | 27  | 2   | 7.4  |
| chr9  | 80923397  | G | A | PSAT1   | missense     | Subset2 | BNM-3    | 22  | 7   | 31.8 |
| chr8  | 10479301  | C | T | RP1L1   | intron       | Subset1 | MeC-2    | 92  | 30  | 32.6 |
| chr8  | 10479301  | C | T | RP1L1   | intron       | Subset1 | MeP-2    | 122 | 61  | 50   |
| chr8  | 10479301  | C | T | RP1L1   | intron       | Subset1 | MeC-11   | 13  | 13  | 100  |
| chr8  | 10479301  | C | T | RP1L1   | intron       | Subset1 | MeC-4    | 77  | 40  | 51.9 |
| chr8  | 10479301  | C | T | RP1L1   | intron       | Subset1 | MeC-8    | 171 | 62  | 36.2 |
| chr8  | 10479301  | C | T | RP1L1   | intron       | Subset1 | MeP-4    | 58  | 52  | 89.6 |
| chr8  | 10479301  | C | T | RP1L1   | intron       | Subset1 | MeP-5    | 88  | 4   | 4.5  |
| chr8  | 10479301  | C | T | RP1L1   | intron       | Subset1 | MeP-6    | 35  | 14  | 40   |
| chr8  | 10479301  | C | T | RP1L1   | intron       | Subset1 | DCIS-1   | 163 | 17  | 10.4 |
| chr8  | 10479301  | C | T | RP1L1   | intron       | Subset1 | DCIS-3   | 15  | 3   | 20   |
| chr8  | 10479301  | C | T | RP1L1   | intron       | Subset1 | DCIS-6   | 17  | 5   | 29.4 |
| chr8  | 10479301  | C | T | RP1L1   | intron       | Subset1 | DCIS-8   | 88  | 22  | 25   |
| chr8  | 10479301  | C | T | RP1L1   | intron       | Subset1 | InvF-10  | 276 | 55  | 19.9 |
| chr8  | 10479301  | C | T | RP1L1   | intron       | Subset1 | InvF-4   | 267 | 90  | 33.7 |
| chr8  | 10479301  | C | T | RP1L1   | intron       | Subset1 | InvF-5   | 68  | 60  | 88.2 |
| chr8  | 10479301  | C | T | RP1L1   | intron       | Subset1 | InvF-1   | 9   | 5   | 55.5 |
| chr8  | 10479301  | C | T | RP1L1   | intron       | Subset1 | InvF-11  | 196 | 7   | 3.5  |

|       |           |   |   |        |          |         |          |      |      |      |
|-------|-----------|---|---|--------|----------|---------|----------|------|------|------|
| chr8  | 10479301  | C | T | RP1L1  | intron   | Subset1 | InvF-12  | 4    | 4    | 100  |
| chr8  | 10479301  | C | T | RP1L1  | intron   | Subset1 | InvF-9   | 397  | 7    | 1.7  |
| chr8  | 10479301  | C | T | RP1L1  | intron   | Subset1 | MeD-2    | 49   | 3    | 6.1  |
| chr8  | 10479301  | C | T | RP1L1  | intron   | Subset1 | MeD-4    | 125  | 5    | 4    |
| chr8  | 10479301  | C | T | RP1L1  | intron   | Subset1 | MeD-7    | 84   | 5    | 5.9  |
| chr8  | 10479301  | C | T | RP1L1  | intron   | Subset1 | MeD-8    | 104  | 59   | 56.7 |
| chr8  | 10479301  | C | T | RP1L1  | intron   | Subset1 | MeD-9    | 39   | 39   | 100  |
| chr8  | 10479301  | C | T | RP1L1  | intron   | Subset1 | M-DCIS-8 | 31   | 11   | 35.4 |
| chr8  | 10479301  | C | T | RP1L1  | intron   | Subset1 | M-DCIS-2 | 57   | 3    | 5.2  |
| chr8  | 10479301  | C | T | RP1L1  | intron   | Subset1 | M-DCIS-5 | 134  | 4    | 2.9  |
| chr8  | 10479301  | C | T | RP1L1  | intron   | Subset1 | S1-11    | 215  | 69   | 32   |
| chr8  | 10479301  | C | T | RP1L1  | intron   | Subset1 | S3-2     | 325  | 111  | 34.1 |
| chr8  | 10479301  | C | T | RP1L1  | intron   | Subset1 | S3-13    | 89   | 2    | 2.2  |
| chr8  | 10479301  | C | T | RP1L1  | intron   | Subset1 | S3-7     | 270  | 246  | 91.1 |
| chr8  | 10479301  | C | T | RP1L1  | intron   | Subset1 | S1-1     | 4    | 4    | 100  |
| chr8  | 10479301  | C | T | RP1L1  | intron   | Subset1 | S1-6     | 42   | 3    | 7.1  |
| chr8  | 10479301  | C | T | RP1L1  | intron   | Subset1 | S1-9     | 198  | 2    | 1    |
| chr8  | 10479301  | C | T | RP1L1  | intron   | Subset1 | S2-13    | 648  | 647  | 99.8 |
| chr8  | 10479301  | C | T | RP1L1  | intron   | Subset1 | S2-5     | 676  | 135  | 19.9 |
| chr8  | 10479301  | C | T | RP1L1  | intron   | Subset1 | S2-7     | 2520 | 2033 | 80.6 |
| chr8  | 10479301  | C | T | RP1L1  | intron   | Subset1 | S2-8     | 67   | 2    | 2.9  |
| chr19 | 14829518  | A | G | ZNF333 | missense | Subset3 | MeP-2    | 238  | 8    | 3.3  |
| chr19 | 14829518  | A | G | ZNF333 | missense | Subset3 | Ly-10    | 182  | 23   | 12.6 |
| chr19 | 14829518  | A | G | ZNF333 | missense | Subset3 | MeD-7    | 269  | 6    | 2.2  |
| chr19 | 14829518  | A | G | ZNF333 | missense | Subset3 | M-DCIS-3 | 21   | 8    | 38   |
| chr19 | 14829518  | A | G | ZNF333 | missense | Subset3 | S3-13    | 157  | 5    | 3.1  |
| chr19 | 14829518  | A | G | ZNF333 | missense | Subset3 | BN-3     | 96   | 10   | 10.4 |
| chr12 | 129360318 | C | A | GLT1D1 | intron   | Subset1 | MeC-2    | 21   | 8    | 38   |
| chr12 | 129360318 | C | A | GLT1D1 | intron   | Subset1 | MeP-2    | 25   | 11   | 44   |
| chr12 | 129360318 | C | A | GLT1D1 | intron   | Subset1 | MeC-11   | 3    | 2    | 66.6 |
| chr12 | 129360318 | C | A | GLT1D1 | intron   | Subset1 | MeC-4    | 23   | 12   | 52.1 |
| chr12 | 129360318 | C | A | GLT1D1 | intron   | Subset1 | MeP-4    | 37   | 28   | 75.6 |
| chr12 | 129360318 | C | A | GLT1D1 | intron   | Subset1 | MeP-6    | 16   | 4    | 25   |
| chr12 | 129360318 | C | A | GLT1D1 | intron   | Subset1 | DCIS-1   | 35   | 22   | 62.8 |
| chr12 | 129360318 | C | A | GLT1D1 | intron   | Subset1 | InvF-5   | 11   | 9    | 81.8 |
| chr12 | 129360318 | C | A | GLT1D1 | intron   | Subset1 | InvF-9   | 25   | 4    | 16   |
| chr12 | 129360318 | C | A | GLT1D1 | intron   | Subset1 | MeD-2    | 6    | 2    | 33.3 |
| chr12 | 129360318 | C | A | GLT1D1 | intron   | Subset1 | MeD-4    | 33   | 3    | 9    |
| chr12 | 129360318 | C | A | GLT1D1 | intron   | Subset1 | MeD-7    | 36   | 9    | 25   |
| chr12 | 129360318 | C | A | GLT1D1 | intron   | Subset1 | MeD-8    | 15   | 2    | 13.3 |
| chr12 | 129360318 | C | A | GLT1D1 | intron   | Subset1 | MeD-9    | 23   | 10   | 43.4 |
| chr12 | 129360318 | C | A | GLT1D1 | intron   | Subset1 | M-DCIS-2 | 17   | 3    | 17.6 |
| chr12 | 129360318 | C | A | GLT1D1 | intron   | Subset1 | S1-11    | 65   | 8    | 12.3 |
| chr12 | 129360318 | C | A | GLT1D1 | intron   | Subset1 | S3-2     | 38   | 16   | 42.1 |
| chr12 | 129360318 | C | A | GLT1D1 | intron   | Subset1 | S3-13    | 11   | 2    | 18.1 |
| chr12 | 129360318 | C | A | GLT1D1 | intron   | Subset1 | S3-7     | 68   | 2    | 2.9  |
| chr12 | 129360318 | C | A | GLT1D1 | intron   | Subset1 | S2-10    | 54   | 5    | 9.2  |
| chr1  | 237580424 | G | A | RYR2   | splice-5 | Subset1 | MeC-2    | 222  | 192  | 86.4 |
| chr1  | 237580424 | G | A | RYR2   | splice-5 | Subset1 | MeP-2    | 155  | 155  | 100  |
| chr1  | 237580424 | G | A | RYR2   | splice-5 | Subset1 | MeC-10   | 32   | 9    | 28.1 |
| chr1  | 237580424 | G | A | RYR2   | splice-5 | Subset1 | MeC-11   | 688  | 7    | 1    |
| chr1  | 237580424 | G | A | RYR2   | splice-5 | Subset1 | MeC-3    | 139  | 138  | 99.2 |
| chr1  | 237580424 | G | A | RYR2   | splice-5 | Subset1 | MeC-4    | 178  | 140  | 78.6 |
| chr1  | 237580424 | G | A | RYR2   | splice-5 | Subset1 | MeC-5    | 32   | 31   | 96.8 |
| chr1  | 237580424 | G | A | RYR2   | splice-5 | Subset1 | MeP-1    | 12   | 3    | 25   |



|       |           |   |   |       |          |         |          |     |     |      |
|-------|-----------|---|---|-------|----------|---------|----------|-----|-----|------|
| chr1  | 237580424 | G | A | RYR2  | splice-5 | Subset1 | MeP-17   | 4   | 3   | 75   |
| chr1  | 237580424 | G | A | RYR2  | splice-5 | Subset1 | MeP-18   | 86  | 84  | 97.6 |
| chr1  | 237580424 | G | A | RYR2  | splice-5 | Subset1 | MeP-12   | 62  | 17  | 27.4 |
| chr1  | 237580424 | G | A | RYR2  | splice-5 | Subset1 | MeP-4    | 75  | 57  | 76   |
| chr1  | 237580424 | G | A | RYR2  | splice-5 | Subset1 | MeP-5    | 43  | 7   | 16.2 |
| chr1  | 237580424 | G | A | RYR2  | splice-5 | Subset1 | MeP-6    | 257 | 147 | 57.1 |
| chr1  | 237580424 | G | A | RYR2  | splice-5 | Subset1 | DCIS-1   | 30  | 12  | 40   |
| chr1  | 237580424 | G | A | RYR2  | splice-5 | Subset1 | DCIS-2   | 47  | 18  | 38.2 |
| chr1  | 237580424 | G | A | RYR2  | splice-5 | Subset1 | DCIS-3   | 64  | 29  | 45.3 |
| chr1  | 237580424 | G | A | RYR2  | splice-5 | Subset1 | DCIS-5   | 35  | 28  | 80   |
| chr1  | 237580424 | G | A | RYR2  | splice-5 | Subset1 | DCIS-6   | 81  | 40  | 49.3 |
| chr1  | 237580424 | G | A | RYR2  | splice-5 | Subset1 | DCIS-8   | 62  | 21  | 33.8 |
| chr1  | 237580424 | G | A | RYR2  | splice-5 | Subset1 | InvF-10  | 221 | 142 | 64.2 |
| chr1  | 237580424 | G | A | RYR2  | splice-5 | Subset1 | InvF-4   | 195 | 191 | 97.9 |
| chr1  | 237580424 | G | A | RYR2  | splice-5 | Subset1 | InvF-5   | 197 | 149 | 75.6 |
| chr1  | 237580424 | G | A | RYR2  | splice-5 | Subset1 | InvF-1   | 152 | 133 | 87.5 |
| chr1  | 237580424 | G | A | RYR2  | splice-5 | Subset1 | InvF-12  | 7   | 5   | 71.4 |
| chr1  | 237580424 | G | A | RYR2  | splice-5 | Subset1 | InvF-9   | 98  | 50  | 51   |
| chr1  | 237580424 | G | A | RYR2  | splice-5 | Subset1 | MeD-2    | 137 | 63  | 45.9 |
| chr1  | 237580424 | G | A | RYR2  | splice-5 | Subset1 | MeD-4    | 132 | 14  | 10.6 |
| chr1  | 237580424 | G | A | RYR2  | splice-5 | Subset1 | MeD-7    | 136 | 29  | 21.3 |
| chr1  | 237580424 | G | A | RYR2  | splice-5 | Subset1 | MeD-8    | 70  | 33  | 47.1 |
| chr1  | 237580424 | G | A | RYR2  | splice-5 | Subset1 | MeD-9    | 212 | 175 | 82.5 |
| chr1  | 237580424 | G | A | RYR2  | splice-5 | Subset1 | M-DCIS-8 | 30  | 22  | 73.3 |
| chr1  | 237580424 | G | A | RYR2  | splice-5 | Subset1 | M-DCIS-2 | 379 | 31  | 8.1  |
| chr1  | 237580424 | G | A | RYR2  | splice-5 | Subset1 | M-DCIS-3 | 83  | 18  | 21.6 |
| chr1  | 237580424 | G | A | RYR2  | splice-5 | Subset1 | M-DCIS-5 | 47  | 4   | 8.5  |
| chr1  | 237580424 | G | A | RYR2  | splice-5 | Subset1 | S1-11    | 656 | 410 | 62.5 |
| chr1  | 237580424 | G | A | RYR2  | splice-5 | Subset1 | S3-2     | 127 | 85  | 66.9 |
| chr1  | 237580424 | G | A | RYR2  | splice-5 | Subset1 | S3-1     | 109 | 64  | 58.7 |
| chr1  | 237580424 | G | A | RYR2  | splice-5 | Subset1 | S3-13    | 147 | 53  | 36   |
| chr1  | 237580424 | G | A | RYR2  | splice-5 | Subset1 | S3-3     | 238 | 39  | 16.3 |
| chr1  | 237580424 | G | A | RYR2  | splice-5 | Subset1 | S3-7     | 44  | 29  | 65.9 |
| chr1  | 237580424 | G | A | RYR2  | splice-5 | Subset1 | S1-12    | 12  | 3   | 25   |
| chr1  | 237580424 | G | A | RYR2  | splice-5 | Subset1 | S1-2     | 265 | 51  | 19.2 |
| chr1  | 237580424 | G | A | RYR2  | splice-5 | Subset1 | S1-6     | 87  | 55  | 63.2 |
| chr1  | 237580424 | G | A | RYR2  | splice-5 | Subset1 | S2-14    | 35  | 2   | 5.7  |
| chr1  | 237580424 | G | A | RYR2  | splice-5 | Subset1 | S2-4     | 99  | 5   | 5    |
| chr1  | 237580424 | G | A | RYR2  | splice-5 | Subset1 | S2-7     | 435 | 206 | 47.3 |
| chr1  | 237580424 | G | A | RYR2  | splice-5 | Subset1 | S2-8     | 232 | 37  | 15.9 |
| chr21 | 48019239  | G | A | S100B | utr-3    | Subset1 | MeC-2    | 224 | 67  | 29.9 |
| chr21 | 48019239  | G | A | S100B | utr-3    | Subset1 | MeP-2    | 142 | 79  | 55.6 |
| chr21 | 48019239  | G | A | S100B | utr-3    | Subset1 | MeC-3    | 15  | 8   | 53.3 |
| chr21 | 48019239  | G | A | S100B | utr-3    | Subset1 | MeC-4    | 91  | 13  | 14.2 |
| chr21 | 48019239  | G | A | S100B | utr-3    | Subset1 | MeP-1    | 60  | 3   | 5    |
| chr21 | 48019239  | G | A | S100B | utr-3    | Subset1 | MeP-4    | 36  | 17  | 47.2 |
| chr21 | 48019239  | G | A | S100B | utr-3    | Subset1 | MeP-6    | 91  | 20  | 21.9 |
| chr21 | 48019239  | G | A | S100B | utr-3    | Subset1 | BN-9     | 181 | 2   | 1.1  |
| chr21 | 48019239  | G | A | S100B | utr-3    | Subset1 | DCIS-1   | 48  | 5   | 10.4 |
| chr21 | 48019239  | G | A | S100B | utr-3    | Subset1 | DCIS-3   | 63  | 4   | 6.3  |
| chr21 | 48019239  | G | A | S100B | utr-3    | Subset1 | DCIS-6   | 15  | 6   | 40   |
| chr21 | 48019239  | G | A | S100B | utr-3    | Subset1 | InvF-10  | 11  | 3   | 27.2 |
| chr21 | 48019239  | G | A | S100B | utr-3    | Subset1 | InvF-4   | 39  | 39  | 100  |
| chr21 | 48019239  | G | A | S100B | utr-3    | Subset1 | InvF-13  | 19  | 17  | 89.4 |
| chr21 | 48019239  | G | A | S100B | utr-3    | Subset1 | MeD-2    | 49  | 12  | 24.4 |

|       |           |   |   |        |          |         |          |     |     |      |
|-------|-----------|---|---|--------|----------|---------|----------|-----|-----|------|
| chr21 | 48019239  | G | A | S100B  | utr-3    | Subset1 | MeD-7    | 119 | 36  | 30.2 |
| chr21 | 48019239  | G | A | S100B  | utr-3    | Subset1 | MeD-8    | 18  | 4   | 22.2 |
| chr21 | 48019239  | G | A | S100B  | utr-3    | Subset1 | MeD-9    | 27  | 7   | 25.9 |
| chr21 | 48019239  | G | A | S100B  | utr-3    | Subset1 | M-DCIS-2 | 50  | 3   | 6    |
| chr21 | 48019239  | G | A | S100B  | utr-3    | Subset1 | S1-11    | 104 | 42  | 40.3 |
| chr21 | 48019239  | G | A | S100B  | utr-3    | Subset1 | S3-13    | 70  | 12  | 17.1 |
| chr21 | 48019239  | G | A | S100B  | utr-3    | Subset1 | S3-7     | 192 | 43  | 22.3 |
| chr21 | 48019239  | G | A | S100B  | utr-3    | Subset1 | S1-1     | 18  | 7   | 38.8 |
| chr21 | 48019239  | G | A | S100B  | utr-3    | Subset1 | S1-6     | 70  | 12  | 17.1 |
| chr21 | 48019239  | G | A | S100B  | utr-3    | Subset1 | S1-9     | 39  | 5   | 12.8 |
| chr21 | 48019239  | G | A | S100B  | utr-3    | Subset1 | S2-13    | 3   | 2   | 66.6 |
| chr3  | 178936091 | G | A | PIK3CA | missense | Subset1 | MeC-2    | 83  | 65  | 78.3 |
| chr3  | 178936091 | G | A | PIK3CA | missense | Subset1 | MeP-2    | 339 | 218 | 64.3 |
| chr3  | 178936091 | G | A | PIK3CA | missense | Subset1 | MeC-1    | 10  | 2   | 20   |
| chr3  | 178936091 | G | A | PIK3CA | missense | Subset1 | MeC-10   | 7   | 4   | 57.1 |
| chr3  | 178936091 | G | A | PIK3CA | missense | Subset1 | MeC-16   | 2   | 2   | 100  |
| chr3  | 178936091 | G | A | PIK3CA | missense | Subset1 | MeC-3    | 41  | 34  | 82.9 |
| chr3  | 178936091 | G | A | PIK3CA | missense | Subset1 | MeC-4    | 109 | 37  | 33.9 |
| chr3  | 178936091 | G | A | PIK3CA | missense | Subset1 | MeC-5    | 17  | 12  | 70.5 |
| chr3  | 178936091 | G | A | PIK3CA | missense | Subset1 | MeC-8    | 11  | 7   | 63.6 |
| chr3  | 178936091 | G | A | PIK3CA | missense | Subset1 | MeP-1    | 5   | 4   | 80   |
| chr3  | 178936091 | G | A | PIK3CA | missense | Subset1 | MeP-18   | 19  | 18  | 94.7 |
| chr3  | 178936091 | G | A | PIK3CA | missense | Subset1 | MeP-12   | 54  | 6   | 11.1 |
| chr3  | 178936091 | G | A | PIK3CA | missense | Subset1 | MeP-4    | 106 | 30  | 28.3 |
| chr3  | 178936091 | G | A | PIK3CA | missense | Subset1 | MeP-6    | 33  | 20  | 60.6 |
| chr3  | 178936091 | G | A | PIK3CA | missense | Subset1 | DCIS-1   | 31  | 6   | 19.3 |
| chr3  | 178936091 | G | A | PIK3CA | missense | Subset1 | DCIS-2   | 5   | 3   | 60   |
| chr3  | 178936091 | G | A | PIK3CA | missense | Subset1 | DCIS-3   | 37  | 20  | 54   |
| chr3  | 178936091 | G | A | PIK3CA | missense | Subset1 | DCIS-6   | 54  | 35  | 64.8 |
| chr3  | 178936091 | G | A | PIK3CA | missense | Subset1 | DCIS-8   | 35  | 10  | 28.5 |
| chr3  | 178936091 | G | A | PIK3CA | missense | Subset1 | InvF-9   | 89  | 5   | 5.6  |
| chr3  | 178936091 | G | A | PIK3CA | missense | Subset1 | MeD-2    | 39  | 14  | 35.8 |
| chr3  | 178936091 | G | A | PIK3CA | missense | Subset1 | MeD-7    | 95  | 37  | 38.9 |
| chr3  | 178936091 | G | A | PIK3CA | missense | Subset1 | MeD-8    | 22  | 15  | 68.1 |
| chr3  | 178936091 | G | A | PIK3CA | missense | Subset1 | MeD-9    | 84  | 53  | 63   |
| chr3  | 178936091 | G | A | PIK3CA | missense | Subset1 | M-DCIS-2 | 29  | 8   | 27.5 |
| chr3  | 178936091 | G | A | PIK3CA | missense | Subset1 | M-DCIS-3 | 27  | 15  | 55.5 |
| chr3  | 178936091 | G | A | PIK3CA | missense | Subset1 | S1-11    | 243 | 179 | 73.6 |
| chr3  | 178936091 | G | A | PIK3CA | missense | Subset1 | S3-2     | 4   | 2   | 50   |
| chr3  | 178936091 | G | A | PIK3CA | missense | Subset1 | S3-1     | 42  | 10  | 23.8 |
| chr3  | 178936091 | G | A | PIK3CA | missense | Subset1 | S3-13    | 28  | 17  | 60.7 |
| chr3  | 178936091 | G | A | PIK3CA | missense | Subset1 | S3-3     | 26  | 2   | 7.6  |
| chr3  | 178936091 | G | A | PIK3CA | missense | Subset1 | S3-7     | 32  | 17  | 53.1 |
| chr3  | 178936091 | G | A | PIK3CA | missense | Subset1 | S1-1     | 9   | 4   | 44.4 |
| chr3  | 178936091 | G | A | PIK3CA | missense | Subset1 | S1-2     | 37  | 11  | 29.7 |
| chr3  | 178936091 | G | A | PIK3CA | missense | Subset1 | S1-6     | 30  | 2   | 6.6  |
| chr3  | 178936091 | G | A | PIK3CA | missense | Subset1 | S1-9     | 4   | 3   | 75   |
| chr3  | 178936091 | G | A | PIK3CA | missense | Subset1 | S2-10    | 103 | 63  | 61.1 |
| chr3  | 178936091 | G | A | PIK3CA | missense | Subset1 | S2-14    | 22  | 7   | 31.8 |
| chr3  | 178936091 | G | A | PIK3CA | missense | Subset1 | S2-13    | 111 | 7   | 6.3  |
| chr6  | 35212297  | A | C | SCUBE3 | intron   | Subset1 | MeC-2    | 245 | 111 | 45.3 |
| chr6  | 35212297  | A | C | SCUBE3 | intron   | Subset1 | MeP-2    | 705 | 164 | 23.2 |
| chr6  | 35212297  | A | C | SCUBE3 | intron   | Subset1 | MeC-11   | 29  | 7   | 24.1 |
| chr6  | 35212297  | A | C | SCUBE3 | intron   | Subset1 | MeC-3    | 247 | 179 | 72.4 |
| chr6  | 35212297  | A | C | SCUBE3 | intron   | Subset1 | MeC-4    | 302 | 122 | 40.3 |

|      |          |   |   |          |          |         |          |      |      |      |
|------|----------|---|---|----------|----------|---------|----------|------|------|------|
| chr6 | 35212297 | A | C | SCUBE3   | intron   | Subset1 | MeC-5    | 61   | 55   | 90.1 |
| chr6 | 35212297 | A | C | SCUBE3   | intron   | Subset1 | MeC-8    | 396  | 116  | 29.2 |
| chr6 | 35212297 | A | C | SCUBE3   | intron   | Subset1 | MeP-1    | 436  | 6    | 1.3  |
| chr6 | 35212297 | A | C | SCUBE3   | intron   | Subset1 | MeP-4    | 175  | 24   | 13.7 |
| chr6 | 35212297 | A | C | SCUBE3   | intron   | Subset1 | MeP-6    | 230  | 33   | 14.3 |
| chr6 | 35212297 | A | C | SCUBE3   | intron   | Subset1 | DCIS-1   | 59   | 17   | 28.8 |
| chr6 | 35212297 | A | C | SCUBE3   | intron   | Subset1 | DCIS-3   | 78   | 12   | 15.3 |
| chr6 | 35212297 | A | C | SCUBE3   | intron   | Subset1 | DCIS-6   | 93   | 15   | 16.1 |
| chr6 | 35212297 | A | C | SCUBE3   | intron   | Subset1 | DCIS-8   | 36   | 8    | 22.2 |
| chr6 | 35212297 | A | C | SCUBE3   | intron   | Subset1 | InvF-10  | 11   | 9    | 81.8 |
| chr6 | 35212297 | A | C | SCUBE3   | intron   | Subset1 | InvF-1   | 24   | 15   | 62.5 |
| chr6 | 35212297 | A | C | SCUBE3   | intron   | Subset1 | InvF-13  | 6    | 4    | 66.6 |
| chr6 | 35212297 | A | C | SCUBE3   | intron   | Subset1 | InvF-9   | 24   | 5    | 20.8 |
| chr6 | 35212297 | A | C | SCUBE3   | intron   | Subset1 | MeD-2    | 38   | 13   | 34.2 |
| chr6 | 35212297 | A | C | SCUBE3   | intron   | Subset1 | MeD-4    | 36   | 2    | 5.5  |
| chr6 | 35212297 | A | C | SCUBE3   | intron   | Subset1 | MeD-7    | 99   | 4    | 4    |
| chr6 | 35212297 | A | C | SCUBE3   | intron   | Subset1 | MeD-8    | 18   | 3    | 16.6 |
| chr6 | 35212297 | A | C | SCUBE3   | intron   | Subset1 | MeD-9    | 65   | 15   | 23   |
| chr6 | 35212297 | A | C | SCUBE3   | intron   | Subset1 | M-DCIS-8 | 36   | 11   | 30.5 |
| chr6 | 35212297 | A | C | SCUBE3   | intron   | Subset1 | M-DCIS-2 | 57   | 2    | 3.5  |
| chr6 | 35212297 | A | C | SCUBE3   | intron   | Subset1 | M-DCIS-5 | 29   | 7    | 24.1 |
| chr6 | 35212297 | A | C | SCUBE3   | intron   | Subset1 | S1-11    | 137  | 49   | 35.7 |
| chr6 | 35212297 | A | C | SCUBE3   | intron   | Subset1 | S3-2     | 25   | 6    | 24   |
| chr6 | 35212297 | A | C | SCUBE3   | intron   | Subset1 | S3-13    | 416  | 22   | 5.2  |
| chr6 | 35212297 | A | C | SCUBE3   | intron   | Subset1 | S3-7     | 209  | 113  | 54   |
| chr6 | 35212297 | A | C | SCUBE3   | intron   | Subset1 | S1-1     | 105  | 104  | 99   |
| chr6 | 35212297 | A | C | SCUBE3   | intron   | Subset1 | S1-12    | 164  | 24   | 14.6 |
| chr6 | 35212297 | A | C | SCUBE3   | intron   | Subset1 | S1-2     | 13   | 9    | 69.2 |
| chr6 | 35212297 | A | C | SCUBE3   | intron   | Subset1 | S1-9     | 16   | 2    | 12.5 |
| chr6 | 35212297 | A | C | SCUBE3   | intron   | Subset1 | S2-10    | 138  | 11   | 7.9  |
| chr6 | 35212297 | A | C | SCUBE3   | intron   | Subset1 | S2-14    | 73   | 2    | 2.7  |
| chr6 | 35212297 | A | C | SCUBE3   | intron   | Subset1 | S2-4     | 186  | 118  | 63.4 |
| chr4 | 99300218 | G | T | RAP1GDS1 | missense | Subset1 | MeC-2    | 79   | 56   | 70.8 |
| chr4 | 99300218 | G | T | RAP1GDS1 | missense | Subset1 | MeP-2    | 210  | 75   | 35.7 |
| chr4 | 99300218 | G | T | RAP1GDS1 | missense | Subset1 | MeC-10   | 38   | 5    | 13.1 |
| chr4 | 99300218 | G | T | RAP1GDS1 | missense | Subset1 | MeC-20   | 8    | 8    | 100  |
| chr4 | 99300218 | G | T | RAP1GDS1 | missense | Subset1 | MeC-4    | 88   | 63   | 71.5 |
| chr4 | 99300218 | G | T | RAP1GDS1 | missense | Subset1 | MeC-5    | 27   | 3    | 11.1 |
| chr4 | 99300218 | G | T | RAP1GDS1 | missense | Subset1 | MeP-18   | 25   | 24   | 96   |
| chr4 | 99300218 | G | T | RAP1GDS1 | missense | Subset1 | MeP-4    | 52   | 12   | 23   |
| chr4 | 99300218 | G | T | RAP1GDS1 | missense | Subset1 | MeP-6    | 47   | 23   | 48.9 |
| chr4 | 99300218 | G | T | RAP1GDS1 | missense | Subset1 | DCIS-1   | 51   | 10   | 19.6 |
| chr4 | 99300218 | G | T | RAP1GDS1 | missense | Subset1 | DCIS-2   | 20   | 2    | 10   |
| chr4 | 99300218 | G | T | RAP1GDS1 | missense | Subset1 | DCIS-3   | 42   | 2    | 4.7  |
| chr4 | 99300218 | G | T | RAP1GDS1 | missense | Subset1 | DCIS-8   | 29   | 3    | 10.3 |
| chr4 | 99300218 | G | T | RAP1GDS1 | missense | Subset1 | InvF-1   | 31   | 8    | 25.8 |
| chr4 | 99300218 | G | T | RAP1GDS1 | missense | Subset1 | InvF-13  | 14   | 4    | 28.5 |
| chr4 | 99300218 | G | T | RAP1GDS1 | missense | Subset1 | InvF-9   | 1028 | 1009 | 98.1 |
| chr4 | 99300218 | G | T | RAP1GDS1 | missense | Subset1 | MeD-2    | 72   | 10   | 13.8 |
| chr4 | 99300218 | G | T | RAP1GDS1 | missense | Subset1 | MeD-7    | 141  | 31   | 21.9 |
| chr4 | 99300218 | G | T | RAP1GDS1 | missense | Subset1 | MeD-8    | 18   | 7    | 38.8 |
| chr4 | 99300218 | G | T | RAP1GDS1 | missense | Subset1 | MeD-9    | 108  | 26   | 24   |
| chr4 | 99300218 | G | T | RAP1GDS1 | missense | Subset1 | M-DCIS-2 | 33   | 5    | 15.1 |
| chr4 | 99300218 | G | T | RAP1GDS1 | missense | Subset1 | M-DCIS-5 | 55   | 3    | 5.4  |
| chr4 | 99300218 | G | T | RAP1GDS1 | missense | Subset1 | S1-11    | 177  | 82   | 46.3 |

|       |           |   |   |          |          |         |          |     |    |      |
|-------|-----------|---|---|----------|----------|---------|----------|-----|----|------|
| chr4  | 99300218  | G | T | RAP1GDS1 | missense | Subset1 | S3-1     | 14  | 5  | 35.7 |
| chr4  | 99300218  | G | T | RAP1GDS1 | missense | Subset1 | S3-13    | 82  | 12 | 14.6 |
| chr4  | 99300218  | G | T | RAP1GDS1 | missense | Subset1 | S3-7     | 24  | 2  | 8.3  |
| chr4  | 99300218  | G | T | RAP1GDS1 | missense | Subset1 | S1-2     | 24  | 5  | 20.8 |
| chr4  | 99300218  | G | T | RAP1GDS1 | missense | Subset1 | S2-14    | 35  | 2  | 5.7  |
| chrX  | 134167162 | C | G | FAM127A  | utr-3    | Subset2 | BN-12    | 46  | 2  | 4.3  |
| chrX  | 134167162 | C | G | FAM127A  | utr-3    | Subset2 | BN-10    | 217 | 7  | 3.2  |
| chrX  | 134167162 | C | G | FAM127A  | utr-3    | Subset2 | BN-3     | 100 | 5  | 5    |
| chrX  | 134167162 | C | G | FAM127A  | utr-3    | Subset2 | BN-5     | 32  | 4  | 12.5 |
| chrX  | 134167162 | C | G | FAM127A  | utr-3    | Subset2 | BN-11    | 12  | 10 | 83.3 |
| chrX  | 134167162 | C | G | FAM127A  | utr-3    | Subset2 | BNM-1    | 12  | 7  | 58.3 |
| chrX  | 134167162 | C | G | FAM127A  | utr-3    | Subset2 | BNM-2    | 12  | 2  | 16.6 |
| chr17 | 73945426  | C | T | ACOX1    | missense | Subset2 | BN-12    | 60  | 26 | 43.3 |
| chr17 | 73945426  | C | T | ACOX1    | missense | Subset2 | BN-10    | 40  | 29 | 72.5 |
| chr17 | 73945426  | C | T | ACOX1    | missense | Subset2 | BN-5     | 124 | 2  | 1.6  |
| chr1  | 158390259 | G | A | OR10K2   | missense | Subset1 | InvF-10  | 156 | 39 | 25   |
| chr1  | 158390259 | G | A | OR10K2   | missense | Subset1 | InvF-4   | 82  | 72 | 87.8 |
| chr1  | 158390259 | G | A | OR10K2   | missense | Subset1 | InvF-5   | 145 | 23 | 15.8 |
| chr1  | 158390259 | G | A | OR10K2   | missense | Subset1 | InvF-1   | 206 | 36 | 17.4 |
| chr1  | 158390259 | G | A | OR10K2   | missense | Subset1 | InvF-11  | 254 | 4  | 1.5  |
| chr1  | 158390259 | G | A | OR10K2   | missense | Subset1 | InvF-9   | 179 | 56 | 31.2 |
| chr7  | 28725930  | C | T | CREB5    | intron   | Subset1 | MeC-2    | 653 | 17 | 2.6  |
| chr7  | 28725930  | C | T | CREB5    | intron   | Subset1 | MeP-2    | 142 | 19 | 13.3 |
| chr7  | 28725930  | C | T | CREB5    | intron   | Subset1 | MeC-11   | 104 | 5  | 4.8  |
| chr7  | 28725930  | C | T | CREB5    | intron   | Subset1 | MeC-3    | 24  | 2  | 8.3  |
| chr7  | 28725930  | C | T | CREB5    | intron   | Subset1 | MeC-4    | 83  | 14 | 16.8 |
| chr7  | 28725930  | C | T | CREB5    | intron   | Subset1 | MeC-5    | 18  | 7  | 38.8 |
| chr7  | 28725930  | C | T | CREB5    | intron   | Subset1 | MeP-1    | 33  | 3  | 9    |
| chr7  | 28725930  | C | T | CREB5    | intron   | Subset1 | MeP-4    | 78  | 33 | 42.3 |
| chr7  | 28725930  | C | T | CREB5    | intron   | Subset1 | MeP-5    | 94  | 2  | 2.1  |
| chr7  | 28725930  | C | T | CREB5    | intron   | Subset1 | MeP-6    | 49  | 27 | 55.1 |
| chr7  | 28725930  | C | T | CREB5    | intron   | Subset1 | DCIS-1   | 41  | 4  | 9.7  |
| chr7  | 28725930  | C | T | CREB5    | intron   | Subset1 | DCIS-3   | 97  | 7  | 7.2  |
| chr7  | 28725930  | C | T | CREB5    | intron   | Subset1 | DCIS-5   | 7   | 2  | 28.5 |
| chr7  | 28725930  | C | T | CREB5    | intron   | Subset1 | DCIS-6   | 107 | 3  | 2.8  |
| chr7  | 28725930  | C | T | CREB5    | intron   | Subset1 | DCIS-8   | 43  | 9  | 20.9 |
| chr7  | 28725930  | C | T | CREB5    | intron   | Subset1 | InvF-10  | 24  | 7  | 29.1 |
| chr7  | 28725930  | C | T | CREB5    | intron   | Subset1 | InvF-5   | 18  | 14 | 77.7 |
| chr7  | 28725930  | C | T | CREB5    | intron   | Subset1 | InvF-13  | 18  | 3  | 16.6 |
| chr7  | 28725930  | C | T | CREB5    | intron   | Subset1 | InvF-9   | 437 | 9  | 2    |
| chr7  | 28725930  | C | T | CREB5    | intron   | Subset1 | MeD-2    | 42  | 6  | 14.2 |
| chr7  | 28725930  | C | T | CREB5    | intron   | Subset1 | MeD-7    | 221 | 33 | 14.9 |
| chr7  | 28725930  | C | T | CREB5    | intron   | Subset1 | MeD-8    | 92  | 9  | 9.7  |
| chr7  | 28725930  | C | T | CREB5    | intron   | Subset1 | MeD-9    | 58  | 19 | 32.7 |
| chr7  | 28725930  | C | T | CREB5    | intron   | Subset1 | M-DCIS-2 | 93  | 31 | 33.3 |
| chr7  | 28725930  | C | T | CREB5    | intron   | Subset1 | S1-11    | 525 | 57 | 10.8 |
| chr7  | 28725930  | C | T | CREB5    | intron   | Subset1 | S3-2     | 41  | 6  | 14.6 |
| chr7  | 28725930  | C | T | CREB5    | intron   | Subset1 | S3-1     | 86  | 5  | 5.8  |
| chr7  | 28725930  | C | T | CREB5    | intron   | Subset1 | S3-7     | 95  | 20 | 21   |
| chr7  | 28725930  | C | T | CREB5    | intron   | Subset1 | S1-2     | 81  | 63 | 77.7 |
| chr7  | 28725930  | C | T | CREB5    | intron   | Subset1 | S2-14    | 124 | 2  | 1.6  |
| chr11 | 73814460  | G | A | C2CD3    | missense | Subset2 | BN-1     | 242 | 4  | 1.6  |
| chr11 | 73814460  | G | A | C2CD3    | missense | Subset2 | BN-13    | 31  | 6  | 19.3 |
| chr11 | 73814460  | G | A | C2CD3    | missense | Subset2 | BN-12    | 233 | 5  | 2.1  |
| chr11 | 73814460  | G | A | C2CD3    | missense | Subset2 | BN-4     | 428 | 32 | 7.4  |

|       |           |   |   |       |          |         |          |     |    |      |
|-------|-----------|---|---|-------|----------|---------|----------|-----|----|------|
| chr11 | 73814460  | G | A | C2CD3 | missense | Subset2 | BN-5     | 458 | 81 | 17.6 |
| chr11 | 73814460  | G | A | C2CD3 | missense | Subset2 | BN-15    | 20  | 4  | 20   |
| chr11 | 73814460  | G | A | C2CD3 | missense | Subset2 | BNM-1    | 30  | 6  | 20   |
| chr11 | 73814460  | G | A | C2CD3 | missense | Subset2 | BNM-2    | 56  | 7  | 12.5 |
| chr11 | 73814460  | G | A | C2CD3 | missense | Subset2 | BNM-3    | 137 | 23 | 16.7 |
| chr7  | 107720040 | G | T | LAMB4 | intron   | Subset3 | InvF-11  | 109 | 17 | 15.5 |
| chr7  | 107720040 | G | T | LAMB4 | intron   | Subset3 | Ly-3     | 205 | 34 | 16.5 |
| chr7  | 107720040 | G | T | LAMB4 | intron   | Subset3 | MeD-4    | 190 | 4  | 2.1  |
| chr7  | 107720040 | G | T | LAMB4 | intron   | Subset3 | MeD-8    | 90  | 14 | 15.5 |
| chr3  | 169099360 | C | T | MECOM | intron   | Subset2 | BN-13    | 243 | 37 | 15.2 |
| chr3  | 169099360 | C | T | MECOM | intron   | Subset2 | BNM-2    | 70  | 4  | 5.7  |
| chr3  | 169099360 | C | T | MECOM | intron   | Subset2 | BNM-3    | 54  | 11 | 20.3 |
| chr2  | 182761450 | G | A | SSFA2 | intron   | Subset1 | MeC-2    | 10  | 4  | 40   |
| chr2  | 182761450 | G | A | SSFA2 | intron   | Subset1 | MeC-3    | 11  | 4  | 36.3 |
| chr2  | 182761450 | G | A | SSFA2 | intron   | Subset1 | MeC-4    | 59  | 31 | 52.5 |
| chr2  | 182761450 | G | A | SSFA2 | intron   | Subset1 | MeC-5    | 26  | 21 | 80.7 |
| chr2  | 182761450 | G | A | SSFA2 | intron   | Subset1 | MeC-8    | 6   | 2  | 33.3 |
| chr2  | 182761450 | G | A | SSFA2 | intron   | Subset1 | MeP-4    | 33  | 9  | 27.2 |
| chr2  | 182761450 | G | A | SSFA2 | intron   | Subset1 | MeP-5    | 25  | 2  | 8    |
| chr2  | 182761450 | G | A | SSFA2 | intron   | Subset1 | MeP-6    | 31  | 9  | 29   |
| chr2  | 182761450 | G | A | SSFA2 | intron   | Subset1 | InvF-13  | 3   | 2  | 66.6 |
| chr2  | 182761450 | G | A | SSFA2 | intron   | Subset1 | MeD-2    | 29  | 6  | 20.6 |
| chr2  | 182761450 | G | A | SSFA2 | intron   | Subset1 | MeD-7    | 100 | 9  | 9    |
| chr2  | 182761450 | G | A | SSFA2 | intron   | Subset1 | MeD-8    | 24  | 8  | 33.3 |
| chr2  | 182761450 | G | A | SSFA2 | intron   | Subset1 | MeD-9    | 49  | 13 | 26.5 |
| chr2  | 182761450 | G | A | SSFA2 | intron   | Subset1 | M-DCIS-8 | 15  | 2  | 13.3 |
| chr2  | 182761450 | G | A | SSFA2 | intron   | Subset1 | M-DCIS-2 | 25  | 3  | 12   |
| chr2  | 182761450 | G | A | SSFA2 | intron   | Subset1 | S1-11    | 75  | 36 | 48   |
| chr2  | 182761450 | G | A | SSFA2 | intron   | Subset1 | S3-13    | 45  | 3  | 6.6  |
| chr2  | 182761450 | G | A | SSFA2 | intron   | Subset1 | S3-7     | 23  | 6  | 26   |
| chr2  | 182761450 | G | A | SSFA2 | intron   | Subset1 | S2-13    | 77  | 2  | 2.5  |
| chr16 | 8994508   | T | C | USP7  | intron   | Subset2 | BN-12    | 84  | 11 | 13   |
| chr16 | 8994508   | T | C | USP7  | intron   | Subset2 | BN-10    | 11  | 4  | 36.3 |
| chr16 | 8994508   | T | C | USP7  | intron   | Subset2 | BN-3     | 30  | 4  | 13.3 |
| chr16 | 8994508   | T | C | USP7  | intron   | Subset2 | BN-4     | 57  | 19 | 33.3 |
| chr16 | 8994508   | T | C | USP7  | intron   | Subset2 | BN-5     | 51  | 15 | 29.4 |
| chr16 | 8994508   | T | C | USP7  | intron   | Subset2 | BNM-1    | 29  | 3  | 10.3 |
| chr11 | 66083512  | G | T | CD248 | nonsense | Subset1 | MeC-2    | 48  | 20 | 41.6 |
| chr11 | 66083512  | G | T | CD248 | nonsense | Subset1 | MeP-2    | 59  | 5  | 8.4  |
| chr11 | 66083512  | G | T | CD248 | nonsense | Subset1 | MeC-4    | 109 | 51 | 46.7 |
| chr11 | 66083512  | G | T | CD248 | nonsense | Subset1 | MeC-5    | 62  | 2  | 3.2  |
| chr11 | 66083512  | G | T | CD248 | nonsense | Subset1 | MeC-8    | 21  | 17 | 80.9 |
| chr11 | 66083512  | G | T | CD248 | nonsense | Subset1 | MeP-1    | 25  | 5  | 20   |
| chr11 | 66083512  | G | T | CD248 | nonsense | Subset1 | MeP-18   | 28  | 25 | 89.2 |
| chr11 | 66083512  | G | T | CD248 | nonsense | Subset1 | MeP-4    | 22  | 6  | 27.2 |
| chr11 | 66083512  | G | T | CD248 | nonsense | Subset1 | MeP-5    | 314 | 7  | 2.2  |
| chr11 | 66083512  | G | T | CD248 | nonsense | Subset1 | MeP-6    | 21  | 7  | 33.3 |
| chr11 | 66083512  | G | T | CD248 | nonsense | Subset1 | DCIS-1   | 21  | 3  | 14.2 |
| chr11 | 66083512  | G | T | CD248 | nonsense | Subset1 | InvF-10  | 43  | 16 | 37.2 |
| chr11 | 66083512  | G | T | CD248 | nonsense | Subset1 | InvF-4   | 144 | 35 | 24.3 |
| chr11 | 66083512  | G | T | CD248 | nonsense | Subset1 | InvF-5   | 20  | 3  | 15   |
| chr11 | 66083512  | G | T | CD248 | nonsense | Subset1 | InvF-9   | 26  | 4  | 15.3 |
| chr11 | 66083512  | G | T | CD248 | nonsense | Subset1 | MeD-4    | 46  | 2  | 4.3  |
| chr11 | 66083512  | G | T | CD248 | nonsense | Subset1 | MeD-9    | 17  | 5  | 29.4 |
| chr11 | 66083512  | G | T | CD248 | nonsense | Subset1 | M-DCIS-2 | 381 | 95 | 24.9 |

|       |          |   |   |       |          |         |       |     |     |      |
|-------|----------|---|---|-------|----------|---------|-------|-----|-----|------|
| chr11 | 66083512 | G | T | CD248 | nonsense | Subset1 | S1-11 | 39  | 25  | 64.1 |
| chr11 | 66083512 | G | T | CD248 | nonsense | Subset1 | S3-2  | 220 | 106 | 48.1 |
| chr11 | 66083512 | G | T | CD248 | nonsense | Subset1 | S3-13 | 126 | 2   | 1.5  |
| chr11 | 66083512 | G | T | CD248 | nonsense | Subset1 | S3-7  | 12  | 2   | 16.6 |
| chr11 | 66083512 | G | T | CD248 | nonsense | Subset1 | S1-9  | 27  | 18  | 66.6 |
| chr11 | 66083512 | G | T | CD248 | nonsense | Subset1 | S2-10 | 52  | 5   | 9.6  |
| chr11 | 66083512 | G | T | CD248 | nonsense | Subset1 | S2-14 | 44  | 3   | 6.8  |

---

**Supplementary Table 10: CNV\_segmentation of all the 54 Chinese breast cancers**

| Sample_id | Chr | Start     | End       | Bins_number | Log2_Copy_ratio | Copy_ratio  |
|-----------|-----|-----------|-----------|-------------|-----------------|-------------|
| M26       | 1   | 805000    | 143125000 | 1731        | -0.024970494    | 0.982840699 |
| M26       | 1   | 144995000 | 248485000 | 1542        | 1.031156288     | 2.043661544 |
| M26       | 2   | 5000      | 243035000 | 3593        | 0.027108049     | 1.018967508 |
| M26       | 3   | 205000    | 197755000 | 3047        | 0.345249069     | 1.270370283 |
| M26       | 4   | 275000    | 190465000 | 2756        | 0.009478834     | 1.006591859 |
| M26       | 5   | 135000    | 180655000 | 2690        | 0.343789998     | 1.269086141 |
| M26       | 6   | 475000    | 2195000   | 28          | -0.491597076    | 0.711237316 |
| M26       | 6   | 2255000   | 170665000 | 2512        | 0.013075606     | 1.009104515 |
| M26       | 7   | 85000     | 158835000 | 2271        | 0.345954698     | 1.270991779 |
| M26       | 8   | 155000    | 146295000 | 2164        | 0.344270429     | 1.269508829 |
| M26       | 9   | 255000    | 140945000 | 1683        | -0.009689107    | 0.993306524 |
| M26       | 10  | 115000    | 135215000 | 1926        | 0.004836242     | 1.003357852 |
| M26       | 11  | 235000    | 134835000 | 1920        | -0.014053527    | 0.990306129 |
| M26       | 12  | 555000    | 39675000  | 531         | 0.335155494     | 1.261513368 |
| M26       | 12  | 39995000  | 63895000  | 364         | 0.001374559     | 1.000953226 |
| M26       | 12  | 64215000  | 133765000 | 1092        | 0.347109014     | 1.272009119 |
| M26       | 13  | 19285000  | 32305000  | 209         | -0.048354471    | 0.967038698 |
| M26       | 13  | 32475000  | 114805000 | 1240        | -0.408229984    | 0.75354732  |
| M26       | 14  | 20725000  | 107135000 | 1304        | 0.003501484     | 1.002429992 |
| M26       | 15  | 20055000  | 102095000 | 1197        | 0.325833884     | 1.253388693 |
| M26       | 16  | 205000    | 35165000  | 466         | 0.790852512     | 1.730096503 |
| M26       | 16  | 46635000  | 89905000  | 627         | -0.466154464    | 0.723891578 |
| M26       | 17  | 75000     | 80985000  | 1074        | 0.340485531     | 1.266182649 |
| M26       | 18  | 355000    | 77815000  | 1192        | -0.427663178    | 0.743465047 |
| M26       | 19  | 285000    | 14575000  | 177         | 0.246219343     | 1.186094816 |
| M26       | 19  | 14795000  | 59045000  | 624         | 0.294706697     | 1.226635574 |
| M26       | 20  | 255000    | 62795000  | 917         | 0.32075106      | 1.248980593 |
| M26       | 21  | 14665000  | 48045000  | 513         | 0.361635464     | 1.284881637 |
| M26       | 22  | 17205000  | 22115000  | 47          | 0.281052103     | 1.215080673 |
| M26       | 22  | 22285000  | 35575000  | 199         | -0.481311271    | 0.716326256 |
| M26       | 22  | 35895000  | 39585000  | 44          | 0.235448885     | 1.177272981 |
| M26       | 22  | 40205000  | 51095000  | 127         | -0.491341094    | 0.711363524 |
| M26       | X   | 2865000   | 152175000 | 2205        | -0.034900715    | 0.976098933 |
| L6        | 1   | 1305000   | 5645000   | 53          | -0.088157691    | 0.940723278 |
| L6        | 1   | 5795000   | 120305000 | 1933        | -0.004894644    | 0.99661304  |
| L6        | 1   | 121205000 | 155755000 | 136         | 0.418840389     | 1.336852586 |
| L6        | 1   | 155935000 | 249185000 | 1589        | 0.044856392     | 1.031580489 |
| L6        | 2   | 165000    | 117345000 | 1908        | 0.033610307     | 1.023570382 |
| L6        | 2   | 117505000 | 152045000 | 598         | -0.376518104    | 0.770294429 |
| L6        | 2   | 152205000 | 176705000 | 440         | -0.044633334    | 0.969536197 |
| L6        | 2   | 176855000 | 242995000 | 1141        | -0.342764006    | 0.78852915  |
| L6        | 3   | 105000    | 197775000 | 3426        | -0.001928233    | 0.998664343 |
| L6        | 4   | 155000    | 190735000 | 3184        | 0.002357182     | 1.00163521  |
| L6        | 5   | 165000    | 180645000 | 3059        | -0.008696076    | 0.993990469 |
| L6        | 6   | 205000    | 170865000 | 2837        | -0.013242439    | 0.990863039 |

|    |    |           |           |      |              |             |
|----|----|-----------|-----------|------|--------------|-------------|
| L6 | 7  | 55000     | 158925000 | 2564 | -0.007389497 | 0.994891086 |
| L6 | 8  | 155000    | 146205000 | 2442 | -0.01196283  | 0.991742282 |
| L6 | 9  | 285000    | 140915000 | 1930 | -0.015074014 | 0.989605886 |
| L6 | 10 | 145000    | 135365000 | 2232 | -0.004801635 | 0.996677292 |
| L6 | 11 | 255000    | 69065000  | 1076 | -0.011466177 | 0.992083752 |
| L6 | 11 | 69345000  | 103285000 | 578  | 0.570476168  | 1.485013625 |
| L6 | 11 | 103505000 | 134875000 | 562  | -0.376055658 | 0.770541381 |
| L6 | 12 | 355000    | 3285000   | 47   | -0.345130456 | 0.787236787 |
| L6 | 12 | 3615000   | 10305000  | 109  | 0.145064133  | 1.105779808 |
| L6 | 12 | 10315000  | 13865000  | 56   | -0.351396968 | 0.78382475  |
| L6 | 12 | 14045000  | 133845000 | 2017 | 0.014948662  | 1.01041549  |
| L6 | 13 | 19375000  | 28885000  | 163  | 0.032113056  | 1.022508656 |
| L6 | 13 | 28895000  | 89085000  | 1000 | -0.307679104 | 0.807940467 |
| L6 | 13 | 89315000  | 112175000 | 419  | 0.436426138  | 1.353247889 |
| L6 | 13 | 112555000 | 115095000 | 37   | -0.013731719 | 0.990527051 |
| L6 | 14 | 20505000  | 107235000 | 1505 | 0.007271596  | 1.00505301  |
| L6 | 15 | 20055000  | 102285000 | 1346 | 0.006200051  | 1.004306796 |
| L6 | 16 | 165000    | 54435000  | 650  | -0.0000005   | 0.999996533 |
| L6 | 16 | 54445000  | 64145000  | 170  | -0.343556233 | 0.788096264 |
| L6 | 16 | 64375000  | 73575000  | 157  | 0.054259639  | 1.038326119 |
| L6 | 16 | 73755000  | 90075000  | 285  | -0.356202914 | 0.781217995 |
| L6 | 17 | 105000    | 19175000  | 316  | -0.32732079  | 0.797015237 |
| L6 | 17 | 19185000  | 49745000  | 367  | 0.062641912  | 1.044376508 |
| L6 | 17 | 49925000  | 80985000  | 521  | 0.587353622  | 1.502488159 |
| L6 | 18 | 165000    | 77775000  | 1311 | -0.008485258 | 0.99413573  |
| L6 | 19 | 255000    | 59095000  | 811  | 0.007329677  | 1.005093473 |
| L6 | 20 | 205000    | 62815000  | 1051 | 0.000653184  | 1.000452855 |
| L6 | 21 | 14605000  | 48095000  | 577  | 0.005155247  | 1.003579737 |
| L6 | 22 | 16905000  | 51165000  | 544  | -0.02418861  | 0.983373505 |
| L6 | X  | 2845000   | 110675000 | 1783 | -0.019360744 | 0.9866698   |
| L6 | X  | 110755000 | 152685000 | 746  | 0.237518822  | 1.178963311 |
| L3 | 1  | 1305000   | 49695000  | 777  | 0.175200785  | 1.129121538 |
| L3 | 1  | 49865000  | 61525000  | 209  | 0.079079058  | 1.05634351  |
| L3 | 1  | 61695000  | 143255000 | 1002 | 0.252027371  | 1.190879443 |
| L3 | 1  | 145405000 | 191925000 | 741  | 0.521367364  | 1.435314973 |
| L3 | 1  | 192145000 | 236875000 | 769  | 0.2667994    | 1.203135724 |
| L3 | 1  | 236885000 | 249155000 | 210  | 0.435033838  | 1.351942542 |
| L3 | 2  | 125000    | 65955000  | 1179 | 0.263152026  | 1.200097838 |
| L3 | 2  | 65965000  | 72315000  | 108  | 0.049807288  | 1.035126644 |
| L3 | 2  | 72325000  | 98405000  | 313  | 0.122478798  | 1.088603664 |
| L3 | 2  | 98575000  | 171045000 | 1247 | -0.021263499 | 0.985369349 |
| L3 | 2  | 171105000 | 178445000 | 134  | 0.188568172  | 1.139632107 |
| L3 | 2  | 178615000 | 243045000 | 1109 | 0.04820973   | 1.033981039 |
| L3 | 3  | 255000    | 87695000  | 1564 | 0.02910719   | 1.020380469 |
| L3 | 3  | 87835000  | 101995000 | 189  | 0.383741697  | 1.304721327 |
| L3 | 3  | 101995001 | 102564999 | 10   | 0.860277592  | 1.81538758  |
| L3 | 3  | 102565000 | 142045000 | 699  | -0.003125051 | 0.997836224 |
| L3 | 3  | 142415000 | 183645000 | 718  | 0.449313997  | 1.365390858 |



|    |    |           |           |      |              |             |
|----|----|-----------|-----------|------|--------------|-------------|
| L3 | 3  | 183725000 | 197775000 | 236  | 0.079084971  | 1.056347839 |
| L3 | 4  | 245000    | 53325000  | 842  | -0.058208555 | 0.960456011 |
| L3 | 4  | 53545000  | 97995000  | 756  | 0.304516477  | 1.235004653 |
| L3 | 4  | 98165000  | 134695000 | 613  | 0.041401424  | 1.029113015 |
| L3 | 4  | 134755000 | 190795000 | 965  | 0.192794047  | 1.142975157 |
| L3 | 5  | 85000     | 21895000  | 386  | 0.037193176  | 1.026115532 |
| L3 | 5  | 21935000  | 42595000  | 345  | 0.142930931  | 1.104145985 |
| L3 | 5  | 42805000  | 55485000  | 158  | 0.413763879  | 1.332156778 |
| L3 | 5  | 55655000  | 180635000 | 2165 | -0.014611503 | 0.989923192 |
| L3 | 6  | 455000    | 88745000  | 1377 | 0.396278855  | 1.316108887 |
| L3 | 6  | 88885000  | 127465000 | 667  | 0.259292941  | 1.196891969 |
| L3 | 6  | 127505000 | 141165000 | 250  | 0.377166438  | 1.29878843  |
| L3 | 6  | 141335000 | 159325000 | 329  | 0.237001476  | 1.178540614 |
| L3 | 6  | 159495000 | 170765000 | 200  | 0.049049885  | 1.034583354 |
| L3 | 7  | 55000     | 99485000  | 1573 | 0.275016451  | 1.210007887 |
| L3 | 7  | 99495000  | 112355000 | 220  | -0.154635097 | 0.898359567 |
| L3 | 7  | 112575000 | 152795000 | 664  | 0.378207945  | 1.299726387 |
| L3 | 7  | 152805000 | 159045000 | 106  | 0.301461163  | 1.232391949 |
| L3 | 8  | 235000    | 29555000  | 501  | -0.007462676 | 0.994840623 |
| L3 | 8  | 29725000  | 146245000 | 1937 | 0.430563581  | 1.34775997  |
| L3 | 9  | 305000    | 141045000 | 1933 | 0.013309889  | 1.0092684   |
| L3 | 10 | 315000    | 68135000  | 1079 | 0.467074079  | 1.382303182 |
| L3 | 10 | 68145000  | 83505000  | 248  | 0.213009212  | 1.159103353 |
| L3 | 10 | 83515000  | 135325000 | 903  | -0.001512053 | 0.998952474 |
| L3 | 11 | 245000    | 56385000  | 865  | 0.225229357  | 1.168963073 |
| L3 | 11 | 56455000  | 73115000  | 270  | 0.377797004  | 1.299356222 |
| L3 | 11 | 73285000  | 132335000 | 1040 | 0.006391743  | 1.004440247 |
| L3 | 11 | 132505000 | 134945000 | 41   | 0.176196026  | 1.129900729 |
| L3 | 12 | 205000    | 26735000  | 439  | 0.787884355  | 1.726540713 |
| L3 | 12 | 27105000  | 34095000  | 118  | 0.429556327  | 1.346819325 |
| L3 | 12 | 34175000  | 112275000 | 1296 | 0.017299929  | 1.012063582 |
| L3 | 12 | 112445000 | 133455000 | 374  | 0.352825119  | 1.277058947 |
| L3 | 13 | 19275000  | 106845000 | 1487 | -0.030582343 | 0.979025035 |
| L3 | 13 | 107015000 | 115065000 | 136  | 0.514739992  | 1.428736624 |
| L3 | 14 | 19105000  | 25935000  | 97   | 0.367291526  | 1.289928881 |
| L3 | 14 | 26105000  | 29165000  | 51   | -0.046836019 | 0.968057053 |
| L3 | 14 | 29335000  | 31665000  | 36   | 0.483984453  | 1.398601011 |
| L3 | 14 | 31835000  | 107245000 | 1312 | -0.001211468 | 0.999160627 |
| L3 | 15 | 20155000  | 48265000  | 407  | -0.01522157  | 0.989504676 |
| L3 | 15 | 48585000  | 75045000  | 468  | 0.164820726  | 1.121026767 |
| L3 | 15 | 75145000  | 102295000 | 465  | 0.542990593  | 1.456989614 |
| L3 | 16 | 165000    | 25945000  | 403  | 0.220378964  | 1.165039577 |
| L3 | 16 | 26045000  | 60045000  | 346  | 0.015266637  | 1.010638214 |
| L3 | 16 | 60185000  | 68655000  | 151  | 0.310311335  | 1.239975259 |
| L3 | 16 | 68665000  | 90095000  | 364  | 0.367818412  | 1.290400061 |
| L3 | 17 | 115000    | 61395000  | 880  | 0.219415491  | 1.164261789 |
| L3 | 17 | 61405000  | 80965000  | 326  | 0.471327658  | 1.386384719 |
| L3 | 18 | 85000     | 5415000   | 92   | 0.032816238  | 1.023007157 |

|    |    |           |           |      |              |             |
|----|----|-----------|-----------|------|--------------|-------------|
| L3 | 18 | 5585000   | 18755000  | 176  | 0.420814568  | 1.338683182 |
| L3 | 18 | 18925000  | 41315000  | 389  | 0.178926762  | 1.132041433 |
| L3 | 18 | 41485000  | 57245000  | 294  | -0.087204566 | 0.941344978 |
| L3 | 18 | 57305000  | 62495000  | 89   | 0.371350133  | 1.293562833 |
| L3 | 18 | 62555000  | 77845000  | 259  | -0.056521131 | 0.961580049 |
| L3 | 19 | 305000    | 32295000  | 413  | 0.183786627  | 1.13586126  |
| L3 | 19 | 32305000  | 41495000  | 148  | 0.645794577  | 1.564600767 |
| L3 | 19 | 41715000  | 59035000  | 244  | 0.04870208   | 1.034333967 |
| L3 | 20 | 255000    | 25995000  | 477  | -0.062773548 | 0.957421728 |
| L3 | 20 | 26155000  | 35775000  | 102  | 0.415826763  | 1.334062967 |
| L3 | 20 | 35945000  | 62895000  | 470  | 0.172364597  | 1.126903983 |
| L3 | 21 | 14425000  | 48025000  | 577  | 0.308921461  | 1.238781258 |
| L3 | 22 | 17245000  | 51155000  | 542  | 0.035829487  | 1.025146068 |
| L3 | X  | 2805000   | 65775000  | 1030 | 0.359405758  | 1.282897367 |
| L3 | X  | 65785000  | 83255000  | 306  | 0.262690469  | 1.199713956 |
| L3 | X  | 83425000  | 141955000 | 1006 | 0.408341897  | 1.32715962  |
| L3 | X  | 142125000 | 152585000 | 181  | -0.105688146 | 0.929361544 |
| L7 | 1  | 1305000   | 82605000  | 1368 | 0.013240972  | 1.009220189 |
| L7 | 1  | 82785000  | 113055000 | 499  | -0.318199924 | 0.80207001  |
| L7 | 1  | 113065000 | 159415000 | 315  | -0.024496747 | 0.983163494 |
| L7 | 1  | 159595000 | 248125000 | 1527 | 0.244442102  | 1.184634578 |
| L7 | 2  | 5000      | 186085000 | 3120 | 0.016246651  | 1.011324968 |
| L7 | 2  | 186205000 | 209155000 | 388  | 0.229541584  | 1.172462341 |
| L7 | 2  | 209335000 | 243045000 | 586  | 0.054217243  | 1.038295607 |
| L7 | 3  | 195000    | 36095000  | 657  | 8.06E-05     | 1.000055847 |
| L7 | 3  | 36275000  | 71045000  | 633  | -0.296298369 | 0.814339129 |
| L7 | 3  | 71055000  | 77245000  | 113  | 0.133099876  | 1.096647506 |
| L7 | 3  | 77265000  | 82615000  | 90   | -0.306774856 | 0.808447024 |
| L7 | 3  | 82625000  | 197665000 | 1926 | 0.000845291  | 1.000586083 |
| L7 | 4  | 195000    | 43395000  | 732  | -0.288515801 | 0.818743923 |
| L7 | 4  | 43555000  | 116295000 | 1184 | -0.017171085 | 0.98816846  |
| L7 | 4  | 116525000 | 190715000 | 1260 | 0.249528931  | 1.188818878 |
| L7 | 5  | 145000    | 85005000  | 1392 | -0.002299758 | 0.998407199 |
| L7 | 5  | 85015000  | 180615000 | 1666 | 0.174698853  | 1.12872877  |
| L7 | 6  | 205000    | 28385000  | 497  | -0.296320346 | 0.814326724 |
| L7 | 6  | 33615000  | 170845000 | 2337 | -0.002133571 | 0.998522214 |
| L7 | 7  | 325000    | 159095000 | 2565 | 0.001257185  | 1.000871794 |
| L7 | 8  | 325000    | 30475000  | 516  | -0.287587155 | 0.819271109 |
| L7 | 8  | 30655000  | 146245000 | 1921 | -0.001829673 | 0.998732571 |
| L7 | 9  | 355000    | 106475000 | 1337 | -0.30766092  | 0.80795065  |
| L7 | 9  | 106655000 | 140935000 | 590  | 0.01818117   | 1.012681969 |
| L7 | 10 | 155000    | 83585000  | 1331 | -0.001376721 | 0.999046185 |
| L7 | 10 | 83595000  | 135325000 | 901  | -0.286303695 | 0.820000279 |
| L7 | 11 | 255000    | 65845000  | 1027 | -0.278496585 | 0.824449719 |
| L7 | 11 | 65905000  | 79545000  | 221  | 0.345245032  | 1.270366728 |
| L7 | 11 | 79655000  | 134925000 | 973  | -0.29366038  | 0.815829522 |
| L7 | 12 | 455000    | 29345000  | 481  | -0.299756342 | 0.81238959  |
| L7 | 12 | 29525000  | 133485000 | 1749 | -0.014525165 | 0.989982436 |

|     |    |           |           |      |              |             |
|-----|----|-----------|-----------|------|--------------|-------------|
| L7  | 13 | 19205000  | 115095000 | 1628 | -0.298970525 | 0.812832209 |
| L7  | 14 | 20575000  | 46385000  | 436  | -0.003182015 | 0.997796826 |
| L7  | 14 | 46565000  | 55725000  | 160  | 0.236919165  | 1.178473375 |
| L7  | 14 | 55955000  | 107145000 | 901  | -0.281280622 | 0.822860273 |
| L7  | 15 | 22815000  | 32915000  | 144  | -0.270020654 | 0.829307673 |
| L7  | 15 | 32925000  | 99085000  | 1142 | 0.007455023  | 1.005180802 |
| L7  | 15 | 99105000  | 102385000 | 60   | -0.317977443 | 0.802193709 |
| L7  | 16 | 365000    | 60945000  | 762  | -0.012864998 | 0.991122304 |
| L7  | 16 | 61125000  | 90095000  | 501  | -0.284625992 | 0.820954408 |
| L7  | 17 | 125000    | 22105000  | 355  | -0.283663408 | 0.821502341 |
| L7  | 17 | 25485000  | 81095000  | 850  | 0.273875707  | 1.209051507 |
| L7  | 18 | 325000    | 77995000  | 1311 | -0.006307126 | 0.995637776 |
| L7  | 19 | 975000    | 10985000  | 128  | -0.047327695 | 0.967727192 |
| L7  | 19 | 11215000  | 23095000  | 189  | -0.250233469 | 0.840760345 |
| L7  | 19 | 23255000  | 59095000  | 487  | -0.025239417 | 0.982657512 |
| L7  | 20 | 235000    | 62885000  | 1052 | 0.010500416  | 1.007304885 |
| L7  | 21 | 14605000  | 47995000  | 575  | 0.015206384  | 1.010596007 |
| L7  | 22 | 17225000  | 21225000  | 51   | 0.300593685  | 1.231651147 |
| L7  | 22 | 21905000  | 50985000  | 489  | -0.236736709 | 0.848662768 |
| L7  | X  | 2765000   | 5635000   | 56   | -0.342679314 | 0.788575441 |
| L7  | X  | 5815000   | 152665000 | 2472 | -0.023333305 | 0.983956847 |
| M20 | 1  | 1305000   | 118095000 | 1956 | -0.263222246 | 0.83322484  |
| M20 | 1  | 118205000 | 249195000 | 1763 | 0.46361554   | 1.378993388 |
| M20 | 2  | 15000     | 32395000  | 581  | 0.046064169  | 1.032444456 |
| M20 | 2  | 32515000  | 191735000 | 2625 | -0.182335471 | 0.881275211 |
| M20 | 2  | 191745000 | 242945000 | 889  | 0.009799666  | 1.006815733 |
| M20 | 3  | 165000    | 197645000 | 3423 | 0.027654479  | 1.019353522 |
| M20 | 4  | 165000    | 30345000  | 509  | -0.5513229   | 0.68239411  |
| M20 | 4  | 30455000  | 190745000 | 2674 | -0.067125421 | 0.954538027 |
| M20 | 5  | 165000    | 5335000   | 89   | 0.160322522  | 1.117536941 |
| M20 | 5  | 5345000   | 45285000  | 688  | 0.217500746  | 1.162717606 |
| M20 | 5  | 45295000  | 180675000 | 2283 | 0.011783092  | 1.008200861 |
| M20 | 6  | 495000    | 69745000  | 1032 | 0.042154015  | 1.029649998 |
| M20 | 6  | 69915000  | 170855000 | 1799 | -0.549919301 | 0.683058335 |
| M20 | 7  | 325000    | 124385000 | 1996 | -0.010830626 | 0.992520891 |
| M20 | 7  | 124395000 | 132695000 | 139  | -0.11885165  | 0.920920389 |
| M20 | 7  | 132805000 | 149985000 | 281  | -0.061805196 | 0.958064575 |
| M20 | 7  | 150205000 | 158965000 | 142  | -0.182965741 | 0.880890292 |
| M20 | 8  | 185000    | 40795000  | 706  | -0.917480962 | 0.529432637 |
| M20 | 8  | 40965000  | 74845000  | 525  | -0.533091779 | 0.691072138 |
| M20 | 8  | 74915000  | 146255000 | 1207 | 0.037707392  | 1.026481333 |
| M20 | 9  | 325000    | 141035000 | 1933 | -0.241912288 | 0.845623697 |
| M20 | 10 | 105000    | 45595000  | 757  | 0.087898771  | 1.062821098 |
| M20 | 10 | 45655000  | 135315000 | 1474 | -0.215489221 | 0.861254057 |
| M20 | 11 | 235000    | 71455000  | 1111 | -0.24427479  | 0.84424007  |
| M20 | 11 | 71555000  | 77945000  | 105  | -0.121937366 | 0.918952779 |
| M20 | 11 | 77955000  | 121125000 | 756  | -0.507734987 | 0.703325784 |
| M20 | 11 | 121305000 | 134925000 | 248  | -0.79916688  | 0.574680946 |

|     |    |           |           |      |              |             |
|-----|----|-----------|-----------|------|--------------|-------------|
| M20 | 12 | 305000    | 20845000  | 337  | -0.74121046  | 0.598237205 |
| M20 | 12 | 21115000  | 133485000 | 1895 | 0.033230162  | 1.02330071  |
| M20 | 13 | 19255000  | 106235000 | 1475 | -0.55030509  | 0.682875704 |
| M20 | 13 | 106245000 | 114965000 | 149  | -0.819711957 | 0.566555048 |
| M20 | 14 | 19135000  | 107075000 | 1504 | 0.020190432  | 1.014093329 |
| M20 | 15 | 20095000  | 102285000 | 1345 | -0.215834778 | 0.861047793 |
| M20 | 16 | 155000    | 90135000  | 1269 | -0.014824995 | 0.989776713 |
| M20 | 17 | 155000    | 22115000  | 354  | -0.480677246 | 0.716641131 |
| M20 | 17 | 25485000  | 34275000  | 134  | 0.016078749  | 1.011207276 |
| M20 | 17 | 34405000  | 81035000  | 713  | 0.242375824  | 1.182939117 |
| M20 | 18 | 205000    | 77845000  | 1311 | -0.211020363 | 0.863925994 |
| M20 | 19 | 305000    | 34515000  | 451  | -0.232274283 | 0.851291846 |
| M20 | 19 | 34735000  | 59085000  | 355  | -0.114494302 | 0.923706034 |
| M20 | 20 | 305000    | 59305000  | 1010 | 0.286518892  | 1.2196937   |
| M20 | 20 | 59475000  | 62755000  | 35   | 0.004799139  | 1.003332049 |
| M20 | 21 | 14425000  | 48035000  | 577  | -0.111430488 | 0.925669769 |
| M20 | 22 | 17305000  | 51195000  | 543  | -0.379080828 | 0.768927335 |
| M20 | X  | 2735000   | 68725000  | 1085 | -0.103278013 | 0.930915412 |
| M20 | X  | 68895000  | 83065000  | 246  | -0.16625029  | 0.891155878 |
| M20 | X  | 83285000  | 152595000 | 1192 | 0.020744574  | 1.014482918 |
| L8  | 1  | 1305000   | 110085000 | 1822 | -0.176010943 | 0.885147051 |
| L8  | 1  | 110515000 | 248195000 | 1893 | 0.00237749   | 1.001649309 |
| L8  | 2  | 75000     | 54335000  | 973  | 0.061283835  | 1.04339385  |
| L8  | 2  | 54515000  | 144445000 | 1401 | -0.174664836 | 0.885973323 |
| L8  | 2  | 144555000 | 242995000 | 1718 | -0.389849018 | 0.763209472 |
| L8  | 3  | 155000    | 197605000 | 3422 | -0.152070491 | 0.899957956 |
| L8  | 4  | 135000    | 190785000 | 3185 | -0.440941739 | 0.736653591 |
| L8  | 5  | 215000    | 55245000  | 885  | -0.126487288 | 0.916059182 |
| L8  | 5  | 55425000  | 105055000 | 830  | -0.569761957 | 0.673727943 |
| L8  | 5  | 105065000 | 139085000 | 592  | -0.556380229 | 0.680006184 |
| L8  | 5  | 139265000 | 180605000 | 744  | -0.119104429 | 0.920759046 |
| L8  | 6  | 435000    | 131195000 | 2113 | -0.018361789 | 0.987353229 |
| L8  | 6  | 131255000 | 170815000 | 720  | -0.214348729 | 0.861935173 |
| L8  | 7  | 145000    | 54845000  | 944  | -0.020848075 | 0.985653127 |
| L8  | 7  | 55005000  | 68055000  | 121  | -0.184382433 | 0.880025704 |
| L8  | 7  | 68065000  | 158955000 | 1494 | -0.040528426 | 0.972298752 |
| L8  | 8  | 185000    | 146225000 | 2442 | -0.008685961 | 0.993997439 |
| L8  | 9  | 305000    | 15045000  | 271  | -0.418327823 | 0.74829144  |
| L8  | 9  | 15195000  | 140925000 | 1657 | 0.113655225  | 1.081966046 |
| L8  | 10 | 155000    | 67295000  | 1072 | 0.270543689  | 1.20626233  |
| L8  | 10 | 67295001  | 81374999  | 223  | 1.712366045  | 3.276978131 |
| L8  | 10 | 81375000  | 135445000 | 939  | -0.444480797 | 0.734848729 |
| L8  | 11 | 605000    | 134795000 | 2219 | -0.192724727 | 0.874951694 |
| L8  | 12 | 225000    | 30895000  | 511  | -0.061753886 | 0.95809865  |
| L8  | 12 | 31075000  | 84405000  | 826  | -0.079891983 | 0.946128482 |
| L8  | 12 | 84685000  | 105125000 | 377  | -0.035885837 | 0.975432646 |
| L8  | 12 | 105305000 | 133465000 | 511  | -0.139737589 | 0.907684239 |
| L8  | 13 | 19245000  | 115045000 | 1626 | -0.694354229 | 0.617985876 |

|    |    |           |           |      |              |             |
|----|----|-----------|-----------|------|--------------|-------------|
| L8 | 14 | 19105000  | 59115000  | 661  | -0.099690026 | 0.933233483 |
| L8 | 14 | 59125000  | 107245000 | 846  | -0.087268465 | 0.941303285 |
| L8 | 15 | 22875000  | 102285000 | 1343 | -0.043349024 | 0.970399677 |
| L8 | 16 | 165000    | 50915000  | 583  | 0.068915376  | 1.048927799 |
| L8 | 16 | 51055000  | 90095000  | 682  | -0.438567675 | 0.737866808 |
| L8 | 17 | 55000     | 80965000  | 1207 | -0.44580389  | 0.73417511  |
| L8 | 18 | 95000     | 77885000  | 1313 | -0.402863918 | 0.756355339 |
| L8 | 19 | 365000    | 29585000  | 362  | -0.487767156 | 0.713127945 |
| L8 | 19 | 29595000  | 59085000  | 447  | -0.079834423 | 0.946166231 |
| L8 | 20 | 315000    | 62755000  | 1048 | -0.02444493  | 0.983198807 |
| L8 | 21 | 14435000  | 25095000  | 157  | -0.520468107 | 0.697145596 |
| L8 | 21 | 25275000  | 48075000  | 417  | -0.097438999 | 0.934690736 |
| L8 | 22 | 17355000  | 50985000  | 540  | -0.4679917   | 0.722970307 |
| L8 | X  | 2705000   | 22845000  | 374  | -0.086428493 | 0.941851494 |
| L8 | X  | 23105000  | 49775000  | 459  | -0.034285841 | 0.976515033 |
| L8 | X  | 50055000  | 152655000 | 1693 | -0.078042368 | 0.94734225  |
| L1 | 1  | 1305000   | 38295000  | 584  | -0.209360101 | 0.864920777 |
| L1 | 1  | 38295001  | 39264999  | 18   | 0.918899655  | 1.890672726 |
| L1 | 1  | 39265000  | 44605000  | 95   | 0.843547492  | 1.794457174 |
| L1 | 1  | 44775000  | 59825000  | 256  | 0.138831287  | 1.101012835 |
| L1 | 1  | 59835000  | 121245000 | 1036 | -0.005475778 | 0.996211674 |
| L1 | 1  | 121285000 | 162645000 | 248  | 0.987608758  | 1.98289565  |
| L1 | 1  | 162695000 | 248875000 | 1477 | 0.136340994  | 1.099113973 |
| L1 | 2  | 95000     | 242905000 | 4094 | 0.013841833  | 1.009640602 |
| L1 | 3  | 125000    | 6395000   | 124  | -0.203831306 | 0.868241745 |
| L1 | 3  | 6555000   | 99545000  | 1583 | 0.003436128  | 1.002384581 |
| L1 | 3  | 99715000  | 197625000 | 1711 | 0.156124306  | 1.114289656 |
| L1 | 4  | 145000    | 190735000 | 3184 | -0.04566896  | 0.968840474 |
| L1 | 5  | 155000    | 45855000  | 787  | -0.025009571 | 0.982814078 |
| L1 | 5  | 49605000  | 175005000 | 2189 | -0.194145774 | 0.874090296 |
| L1 | 5  | 175035000 | 180645000 | 80   | 0.013009648  | 1.009058382 |
| L1 | 6  | 465000    | 64985000  | 965  | 0.206529503  | 1.153909039 |
| L1 | 6  | 64995000  | 116935000 | 890  | -0.011418486 | 0.992116548 |
| L1 | 6  | 117055000 | 159495000 | 776  | 0.167908939  | 1.123428992 |
| L1 | 6  | 159665000 | 170845000 | 199  | -0.161665607 | 0.893992351 |
| L1 | 7  | 105000    | 158945000 | 2563 | -0.005021528 | 0.996525392 |
| L1 | 8  | 165000    | 8595000   | 138  | -0.482844803 | 0.715565233 |
| L1 | 8  | 8655000   | 34075000  | 448  | -0.354735318 | 0.782013101 |
| L1 | 8  | 34105000  | 47965000  | 175  | 0.75330134   | 1.685645708 |
| L1 | 8  | 48285000  | 79805000  | 545  | 0.155499996  | 1.113807564 |
| L1 | 8  | 79905000  | 146265000 | 1130 | 0.618451071  | 1.535226023 |
| L1 | 9  | 335000    | 21275000  | 382  | -0.195464747 | 0.87329153  |
| L1 | 9  | 21495000  | 30145000  | 158  | -0.457194787 | 0.728401205 |
| L1 | 9  | 30235000  | 33985000  | 65   | -0.079490804 | 0.946391614 |
| L1 | 9  | 34065000  | 132335000 | 1203 | 0.135879955  | 1.098762787 |
| L1 | 9  | 132505000 | 140975000 | 114  | -0.099305018 | 0.933482565 |
| L1 | 10 | 195000    | 135445000 | 2233 | -0.083573337 | 0.943717305 |
| L1 | 11 | 235000    | 128095000 | 2102 | 0.13840937   | 1.10069089  |

|     |    |           |           |      |              |             |
|-----|----|-----------|-----------|------|--------------|-------------|
| L1  | 11 | 128125000 | 134845000 | 120  | 0.070771615  | 1.050278267 |
| L1  | 12 | 315000    | 20795000  | 336  | 0.035467552  | 1.024888917 |
| L1  | 12 | 21065000  | 38705000  | 232  | -0.208621009 | 0.865363989 |
| L1  | 12 | 38875000  | 44915000  | 109  | 0.041888169  | 1.029460281 |
| L1  | 12 | 45085000  | 119455000 | 1305 | -0.001721884 | 0.998807193 |
| L1  | 12 | 119675000 | 127505000 | 135  | -0.270860194 | 0.828825219 |
| L1  | 12 | 127515000 | 133495000 | 105  | -0.072225851 | 0.951169361 |
| L1  | 13 | 19265000  | 115095000 | 1627 | -0.187970636 | 0.877839665 |
| L1  | 14 | 20565000  | 107105000 | 1502 | -0.185571388 | 0.879300754 |
| L1  | 15 | 20175000  | 28305000  | 92   | 0.118066661  | 1.085279517 |
| L1  | 15 | 28315000  | 102375000 | 1255 | -0.165892005 | 0.891377218 |
| L1  | 16 | 295000    | 47375000  | 517  | -0.237418132 | 0.848262017 |
| L1  | 16 | 47545000  | 52995000  | 101  | 0.270792783  | 1.20647062  |
| L1  | 16 | 53105000  | 84755000  | 567  | -0.003168832 | 0.997805944 |
| L1  | 16 | 84765000  | 89995000  | 74   | 0.233307344  | 1.175526729 |
| L1  | 17 | 15000     | 21825000  | 353  | -0.167565382 | 0.890343913 |
| L1  | 17 | 22045000  | 81045000  | 854  | 0.155511106  | 1.113816142 |
| L1  | 18 | 65000     | 19295000  | 283  | -0.200985516 | 0.869956087 |
| L1  | 18 | 19325000  | 23405000  | 74   | 0.041380483  | 1.029098077 |
| L1  | 18 | 23675000  | 77995000  | 955  | -0.396831972 | 0.7595243   |
| L1  | 19 | 965000    | 59005000  | 806  | -0.264566847 | 0.832448631 |
| L1  | 20 | 225000    | 62885000  | 1053 | 0.019163277  | 1.013371582 |
| L1  | 21 | 14755000  | 48025000  | 574  | -0.002132192 | 0.998523168 |
| L1  | 22 | 17245000  | 28045000  | 156  | -0.042319907 | 0.971092139 |
| L1  | 22 | 28145000  | 51115000  | 383  | -0.187208176 | 0.878303723 |
| L1  | X  | 2785000   | 58095000  | 961  | -0.201858849 | 0.86942962  |
| L1  | X  | 62105000  | 146295000 | 1461 | -0.472594454 | 0.720667428 |
| L1  | X  | 146305000 | 152615000 | 104  | -0.114486666 | 0.923710924 |
| M24 | 1  | 1305000   | 121295000 | 1993 | -0.027072767 | 0.981409562 |
| M24 | 1  | 145195000 | 249175000 | 1724 | 1.128175768  | 2.185821767 |
| M24 | 2  | 5000      | 243045000 | 4099 | -0.011728029 | 0.991903703 |
| M24 | 3  | 205000    | 197685000 | 3423 | -0.01525565  | 0.989481302 |
| M24 | 4  | 205000    | 190765000 | 3183 | -0.013051006 | 0.990994526 |
| M24 | 5  | 105000    | 180625000 | 3060 | -0.020151032 | 0.986129464 |
| M24 | 6  | 445000    | 170895000 | 2836 | -0.005517031 | 0.996183188 |
| M24 | 7  | 315000    | 159085000 | 2565 | 0.464642882  | 1.379975718 |
| M24 | 8  | 305000    | 146295000 | 2441 | -0.012764803 | 0.99119114  |
| M24 | 9  | 205000    | 140925000 | 1933 | -0.024290381 | 0.983304138 |
| M24 | 10 | 145000    | 135385000 | 2233 | 0.261740206  | 1.198923998 |
| M24 | 11 | 455000    | 134875000 | 2222 | -0.01792589  | 0.987651595 |
| M24 | 12 | 345000    | 133845000 | 2236 | -0.02729196  | 0.981260465 |
| M24 | 13 | 19345000  | 115045000 | 1624 | -0.004518965 | 0.996872593 |
| M24 | 14 | 20515000  | 107225000 | 1505 | -0.031372628 | 0.978488888 |
| M24 | 15 | 22805000  | 102345000 | 1345 | -0.027490907 | 0.981125159 |
| M24 | 16 | 185000    | 90095000  | 1267 | -0.075919432 | 0.948737297 |
| M24 | 17 | 55000     | 63495000  | 913  | 0.720458346  | 1.647705429 |
| M24 | 17 | 63715000  | 81035000  | 293  | 1.675839381  | 3.195051933 |
| M24 | 18 | 55000     | 77965000  | 1314 | 0.020956504  | 1.014631956 |

|     |    |           |           |      |              |             |
|-----|----|-----------|-----------|------|--------------|-------------|
| M24 | 19 | 355000    | 58985000  | 807  | -0.155483039 | 0.897831713 |
| M24 | 20 | 205000    | 62645000  | 1050 | 0.555719462  | 1.46990148  |
| M24 | 21 | 14695000  | 47955000  | 572  | -0.032061061 | 0.978022078 |
| M24 | 22 | 16925000  | 51105000  | 543  | 0.393830254  | 1.313877028 |
| M24 | X  | 2755000   | 152645000 | 2531 | -0.044266369 | 0.96978284  |
| L13 | 1  | 1305000   | 115275000 | 1906 | 0.315683054  | 1.244600779 |
| L13 | 1  | 115505000 | 174595000 | 549  | 0.922481397  | 1.895372482 |
| L13 | 1  | 174655000 | 184795000 | 183  | 1.314494563  | 2.487151799 |
| L13 | 1  | 185025000 | 195615000 | 149  | 0.720135223  | 1.647336432 |
| L13 | 1  | 195625000 | 248185000 | 924  | 0.961383938  | 1.947176873 |
| L13 | 2  | 65000     | 96195000  | 1571 | 0.381025429  | 1.302267143 |
| L13 | 2  | 96245000  | 243045000 | 2526 | -0.041716653 | 0.97149828  |
| L13 | 3  | 275000    | 34895000  | 634  | 0.904192584  | 1.871496804 |
| L13 | 3  | 35005000  | 84105000  | 875  | -0.056132451 | 0.961839146 |
| L13 | 3  | 84255000  | 184645000 | 1689 | 0.903184664  | 1.870189764 |
| L13 | 3  | 184755000 | 197755000 | 219  | -0.038165728 | 0.973892387 |
| L13 | 4  | 105000    | 190715000 | 3184 | 0.72725121   | 1.655481869 |
| L13 | 5  | 145000    | 180665000 | 3059 | 0.591713731  | 1.507035844 |
| L13 | 6  | 495000    | 13195000  | 229  | 0.070420764  | 1.050022879 |
| L13 | 6  | 13305000  | 16435000  | 59   | 1.119503402  | 2.172721712 |
| L13 | 6  | 16555000  | 34195000  | 212  | 0.664366374  | 1.584872051 |
| L13 | 6  | 34425000  | 71715000  | 562  | 0.078265435  | 1.055747942 |
| L13 | 6  | 71805000  | 73345000  | 30   | 0.859788741  | 1.814772548 |
| L13 | 6  | 73405000  | 170865000 | 1732 | -0.042505598 | 0.970967157 |
| L13 | 7  | 345000    | 23845000  | 387  | 0.812517785  | 1.756273811 |
| L13 | 7  | 23965000  | 32925000  | 163  | 0.854033532  | 1.807547465 |
| L13 | 7  | 32955000  | 49395000  | 300  | 1.206293128  | 2.30743999  |
| L13 | 7  | 49515000  | 70285000  | 256  | 0.534784366  | 1.448725603 |
| L13 | 7  | 70455000  | 159095000 | 1452 | 0.002364359  | 1.001640192 |
| L13 | 8  | 325000    | 35775000  | 615  | 0.014998651  | 1.010450502 |
| L13 | 8  | 35805000  | 38565000  | 52   | 0.776004006  | 1.712381324 |
| L13 | 8  | 38745000  | 60295000  | 307  | 0.002104125  | 1.001459532 |
| L13 | 8  | 60455000  | 70545000  | 175  | 1.23259115   | 2.349886621 |
| L13 | 8  | 70685000  | 73855000  | 56   | -0.021863663 | 0.984959519 |
| L13 | 8  | 74035000  | 75795000  | 30   | 0.929764397  | 1.904964876 |
| L13 | 8  | 76025000  | 78195000  | 35   | -0.04903031  | 0.96658579  |
| L13 | 8  | 78625000  | 81635000  | 53   | 0.881189579  | 1.841893415 |
| L13 | 8  | 81645000  | 90185000  | 138  | 1.117989979  | 2.170443668 |
| L13 | 8  | 90305000  | 93175000  | 51   | 0.045780323  | 1.032241345 |
| L13 | 8  | 93355000  | 134135000 | 726  | 1.282302919  | 2.432269209 |
| L13 | 8  | 134355000 | 136745000 | 46   | 0.081912004  | 1.058419836 |
| L13 | 8  | 136905000 | 146095000 | 124  | 0.791425397  | 1.73078365  |
| L13 | 9  | 225000    | 140955000 | 1933 | 0.336432856  | 1.262630806 |
| L13 | 10 | 185000    | 1235000   | 19   | 0.613206007  | 1.529654687 |
| L13 | 10 | 1415000   | 135345000 | 2209 | -0.043159429 | 0.970527213 |
| L13 | 11 | 205000    | 6405000   | 82   | 0.156778185  | 1.114794805 |
| L13 | 11 | 6455000   | 16585000  | 181  | 1.051595972  | 2.072821626 |
| L13 | 11 | 16765000  | 24425000  | 131  | 0.106767973  | 1.076813179 |

|     |    |           |           |      |              |             |
|-----|----|-----------|-----------|------|--------------|-------------|
| L13 | 11 | 24655000  | 33895000  | 153  | 0.732191574  | 1.661160617 |
| L13 | 11 | 34075000  | 35895000  | 36   | 0.259387686  | 1.196970574 |
| L13 | 11 | 36075000  | 45775000  | 181  | 0.984514371  | 1.978647163 |
| L13 | 11 | 46005000  | 48545000  | 48   | 0.517386054  | 1.43135949  |
| L13 | 11 | 48555000  | 60845000  | 122  | 0.012492167  | 1.008696507 |
| L13 | 11 | 61075000  | 62995000  | 30   | 0.48185851   | 1.396541562 |
| L13 | 11 | 63055000  | 66375000  | 55   | 0.312776932  | 1.242096215 |
| L13 | 11 | 66605000  | 80775000  | 230  | 1.273747308  | 2.417887816 |
| L13 | 11 | 80855000  | 85665000  | 93   | 0.046027145  | 1.032417961 |
| L13 | 11 | 85845000  | 88315000  | 39   | 0.951126127  | 1.933381212 |
| L13 | 11 | 88495000  | 134935000 | 813  | 0.0134548    | 1.009369781 |
| L13 | 12 | 465000    | 133805000 | 2234 | 0.679418175  | 1.601493758 |
| L13 | 13 | 19335000  | 115025000 | 1624 | 0.056641367  | 1.040041695 |
| L13 | 14 | 20505000  | 107125000 | 1504 | 0.613277668  | 1.529730669 |
| L13 | 15 | 22855000  | 65625000  | 712  | -0.113090139 | 0.924605507 |
| L13 | 15 | 65805000  | 102395000 | 630  | 0.701413633  | 1.626097353 |
| L13 | 16 | 155000    | 31835000  | 487  | 0.740449549  | 1.670696352 |
| L13 | 16 | 34215000  | 52925000  | 132  | 0.058641451  | 1.04148456  |
| L13 | 16 | 53105000  | 55565000  | 47   | 1.021173675  | 2.029569403 |
| L13 | 16 | 55575000  | 89985000  | 594  | 0.048792877  | 1.034399066 |
| L13 | 17 | 15000     | 20135000  | 337  | -0.044724968 | 0.969474618 |
| L13 | 17 | 20145000  | 42315000  | 248  | 0.816918234  | 1.761638902 |
| L13 | 17 | 42325000  | 81045000  | 625  | 1.298512132  | 2.45975075  |
| L13 | 18 | 205000    | 77985000  | 1313 | 0.760199984  | 1.69372539  |
| L13 | 19 | 305000    | 18105000  | 246  | 0.025360497  | 1.017733969 |
| L13 | 19 | 18285000  | 59095000  | 560  | 0.627655843  | 1.545052481 |
| L13 | 20 | 775000    | 12895000  | 223  | 1.787269979  | 3.451611236 |
| L13 | 20 | 12895001  | 13624999  | 13   | 1.83380334   | 3.564756023 |
| L13 | 20 | 13625000  | 15435000  | 33   | 0.344724124  | 1.269908124 |
| L13 | 20 | 15605000  | 20595000  | 97   | 1.353486926  | 2.555289813 |
| L13 | 20 | 20705000  | 34215000  | 169  | 0.32096534   | 1.249166115 |
| L13 | 20 | 34305000  | 61505000  | 484  | 1.609452813  | 3.051360875 |
| L13 | 21 | 14635000  | 46345000  | 543  | -0.056903487 | 0.961325237 |
| L13 | 21 | 46455000  | 48015000  | 29   | 0.653287955  | 1.572748466 |
| L13 | 22 | 17245000  | 51155000  | 542  | 0.549075855  | 1.463148149 |
| L13 | X  | 2755000   | 13605000  | 201  | 0.2996015    | 1.230804394 |
| L13 | X  | 13615000  | 152625000 | 2330 | 0.069288393  | 1.049199041 |
| L2  | 1  | 1305000   | 107105000 | 1772 | -0.288087331 | 0.818987121 |
| L2  | 1  | 107285000 | 248865000 | 1942 | -0.022976254 | 0.984200221 |
| L2  | 2  | 95000     | 227405000 | 3827 | -0.073217119 | 0.950516042 |
| L2  | 2  | 227585000 | 242985000 | 265  | -0.28317363  | 0.821781279 |
| L2  | 3  | 205000    | 13845000  | 245  | -0.129659305 | 0.914047279 |
| L2  | 3  | 14025000  | 39985000  | 479  | 0.225110094  | 1.168866443 |
| L2  | 3  | 40155000  | 96905000  | 931  | -0.310124794 | 0.806571987 |
| L2  | 3  | 97085000  | 100945000 | 72   | 0.133343156  | 1.096832447 |
| L2  | 3  | 101125000 | 181675000 | 1411 | 0.125798144  | 1.091111203 |
| L2  | 3  | 181685000 | 197755000 | 273  | 0.257401385  | 1.19532372  |
| L2  | 4  | 235000    | 16395000  | 257  | -0.313125323 | 0.804896215 |



|     |    |           |           |      |              |             |
|-----|----|-----------|-----------|------|--------------|-------------|
| L2  | 4  | 16535000  | 53545000  | 585  | 0.111552826  | 1.080390475 |
| L2  | 4  | 53555000  | 149855000 | 1643 | -0.309701787 | 0.806808514 |
| L2  | 4  | 150035000 | 176845000 | 449  | -0.066328922 | 0.955065165 |
| L2  | 4  | 177175000 | 190495000 | 237  | -0.313287764 | 0.804805593 |
| L2  | 5  | 105000    | 5775000   | 99   | -0.353096035 | 0.78290218  |
| L2  | 5  | 5955000   | 22265000  | 290  | 0.406404162  | 1.325378261 |
| L2  | 5  | 22445000  | 180635000 | 2664 | 0.015123905  | 1.010538233 |
| L2  | 6  | 465000    | 56695000  | 882  | -0.050034119 | 0.965913485 |
| L2  | 6  | 56875000  | 125395000 | 1124 | -0.273740162 | 0.827172334 |
| L2  | 6  | 125575000 | 170865000 | 823  | -0.069881381 | 0.952716328 |
| L2  | 7  | 345000    | 11045000  | 163  | -0.347589477 | 0.785896114 |
| L2  | 7  | 11325000  | 54765000  | 777  | 0.409983552  | 1.328670666 |
| L2  | 7  | 54855000  | 158935000 | 1618 | 0.097359587  | 1.069813702 |
| L2  | 8  | 165000    | 36225000  | 627  | -0.54784332  | 0.684041937 |
| L2  | 8  | 36235000  | 120405000 | 1377 | -0.067214344 | 0.954479195 |
| L2  | 8  | 120455000 | 140045000 | 367  | 0.27380966   | 1.208996158 |
| L2  | 8  | 140235000 | 146215000 | 68   | -0.31086522  | 0.806158141 |
| L2  | 9  | 295000    | 27615000  | 498  | -0.294682504 | 0.815251727 |
| L2  | 9  | 27795000  | 71075000  | 202  | -0.083350043 | 0.943863381 |
| L2  | 9  | 71255000  | 140945000 | 1224 | -0.300456751 | 0.811995281 |
| L2  | 10 | 145000    | 42975000  | 713  | 0.611478518  | 1.527824168 |
| L2  | 10 | 43205000  | 135355000 | 1516 | -0.265677176 | 0.831808207 |
| L2  | 11 | 285000    | 65265000  | 1015 | -0.300831966 | 0.811784126 |
| L2  | 11 | 65495000  | 71175000  | 88   | 0.088849091  | 1.06352142  |
| L2  | 11 | 71455000  | 134835000 | 1111 | -0.494790074 | 0.709664933 |
| L2  | 12 | 315000    | 61195000  | 951  | 0.095458462  | 1.068404874 |
| L2  | 12 | 61365000  | 133795000 | 1282 | 0.264142056  | 1.200921671 |
| L2  | 13 | 19205000  | 90335000  | 1185 | -0.233039337 | 0.85084053  |
| L2  | 13 | 90505000  | 114955000 | 437  | -0.079074015 | 0.946665063 |
| L2  | 14 | 19135000  | 34795000  | 251  | 0.119802111  | 1.086585809 |
| L2  | 14 | 34855000  | 52385000  | 284  | 0.092716086  | 1.066375904 |
| L2  | 14 | 52565000  | 107145000 | 966  | -0.301815521 | 0.811230882 |
| L2  | 15 | 20195000  | 102345000 | 1345 | 0.288271951  | 1.221176685 |
| L2  | 16 | 145000    | 77375000  | 1053 | -0.018753536 | 0.987085161 |
| L2  | 16 | 77385000  | 90055000  | 214  | -0.135826225 | 0.910148446 |
| L2  | 17 | 85000     | 11985000  | 202  | -0.257899058 | 0.836304912 |
| L2  | 17 | 12165000  | 81095000  | 1004 | 0.105686673  | 1.076006411 |
| L2  | 18 | 165000    | 64715000  | 1083 | -0.063542563 | 0.956911519 |
| L2  | 18 | 64945000  | 77865000  | 225  | -0.288524199 | 0.818739157 |
| L2  | 19 | 345000    | 59095000  | 809  | 0.005252306  | 1.003647256 |
| L2  | 20 | 155000    | 33755000  | 542  | -0.011026183 | 0.992386364 |
| L2  | 20 | 33935000  | 62595000  | 504  | 0.657154924  | 1.576969682 |
| L2  | 21 | 14625000  | 48065000  | 576  | 0.115309964  | 1.083207749 |
| L2  | 22 | 17345000  | 50825000  | 539  | -0.07661869  | 0.948277566 |
| L2  | X  | 2705000   | 25425000  | 418  | 0.201290863  | 1.149726622 |
| L2  | X  | 25655000  | 152555000 | 2109 | -0.005374326 | 0.996281731 |
| M17 | 1  | 1305000   | 27035000  | 395  | -0.660534911 | 0.632643687 |
| M17 | 1  | 27205000  | 143255000 | 1596 | 0.055827245  | 1.039454959 |

|     |    |           |           |      |              |             |
|-----|----|-----------|-----------|------|--------------|-------------|
| M17 | 1  | 143255001 | 146524999 | 9    | 0.84714786   | 1.798940986 |
| M17 | 1  | 146525000 | 185425000 | 649  | 0.572530293  | 1.48712951  |
| M17 | 1  | 185435000 | 248875000 | 1067 | 0.0468338    | 1.032995378 |
| M17 | 2  | 95000     | 101675000 | 1661 | -0.137899703 | 0.908841297 |
| M17 | 2  | 101845000 | 243005000 | 2432 | -0.650276338 | 0.637158259 |
| M17 | 3  | 225000    | 46625000  | 847  | -0.079949085 | 0.946091035 |
| M17 | 3  | 46845000  | 79755000  | 598  | -0.682102655 | 0.623256248 |
| M17 | 3  | 79765000  | 130945000 | 816  | 0.066743601  | 1.047349973 |
| M17 | 3  | 131085000 | 155545000 | 431  | 0.505074068  | 1.419196216 |
| M17 | 3  | 155675000 | 197795000 | 724  | 0.045860156  | 1.032298467 |
| M17 | 4  | 105000    | 48305000  | 818  | -0.494560263 | 0.709777987 |
| M17 | 4  | 48355000  | 153435000 | 1735 | -0.104341056 | 0.930229724 |
| M17 | 4  | 153655000 | 190755000 | 628  | -0.785852062 | 0.5800093   |
| M17 | 5  | 175000    | 157595000 | 2657 | 0.040617288  | 1.028553821 |
| M17 | 5  | 157705000 | 180555000 | 398  | 0.221982559  | 1.16633527  |
| M17 | 6  | 225000    | 5245000   | 88   | -0.231369303 | 0.851826016 |
| M17 | 6  | 5305000   | 17075000  | 216  | -0.272043843 | 0.828145494 |
| M17 | 6  | 17205000  | 74535000  | 819  | -0.199941682 | 0.870585754 |
| M17 | 6  | 74705000  | 100365000 | 438  | -0.417600468 | 0.748668797 |
| M17 | 6  | 100585000 | 116725000 | 282  | -0.14380521  | 0.905128663 |
| M17 | 6  | 116735000 | 170885000 | 985  | -0.347690496 | 0.785841086 |
| M17 | 7  | 105000    | 64785000  | 1014 | -0.429383755 | 0.742578909 |
| M17 | 7  | 65055000  | 72945000  | 139  | -0.275916508 | 0.825925462 |
| M17 | 7  | 72975000  | 143045000 | 1153 | -0.073921745 | 0.950051914 |
| M17 | 7  | 143165000 | 158955000 | 253  | -0.512765964 | 0.700877413 |
| M17 | 8  | 175000    | 31075000  | 529  | -0.987204287 | 0.504454381 |
| M17 | 8  | 31245000  | 93275000  | 1007 | 0.013953476  | 1.009718736 |
| M17 | 8  | 93445000  | 133615000 | 714  | 0.493053809  | 1.407420868 |
| M17 | 8  | 133655000 | 146225000 | 186  | 0.004742203  | 1.003292453 |
| M17 | 9  | 295000    | 140945000 | 1931 | 0.041228789  | 1.028989877 |
| M17 | 10 | 165000    | 25465000  | 458  | 0.643014257  | 1.561588418 |
| M17 | 10 | 25475000  | 32495000  | 132  | 0.509620239  | 1.423675392 |
| M17 | 10 | 32505000  | 53155000  | 232  | 0.066636227  | 1.047272026 |
| M17 | 10 | 53325000  | 72185000  | 320  | -0.630118759 | 0.646123226 |
| M17 | 10 | 72355000  | 135305000 | 1083 | 0.044875761  | 1.031594339 |
| M17 | 11 | 205000    | 81665000  | 1288 | -0.021193656 | 0.985417053 |
| M17 | 11 | 81675000  | 134845000 | 935  | -0.616925451 | 0.652059061 |
| M17 | 12 | 315000    | 49245000  | 761  | 0.039197349  | 1.027541989 |
| M17 | 12 | 49335000  | 68945000  | 326  | 0.513884787  | 1.427889944 |
| M17 | 12 | 69115000  | 133755000 | 1144 | -0.693981994 | 0.618145345 |
| M17 | 13 | 19275000  | 115055000 | 1626 | 0.062436682  | 1.044227951 |
| M17 | 14 | 20525000  | 95035000  | 1305 | 0.06410147   | 1.045433627 |
| M17 | 14 | 95155000  | 106885000 | 195  | 0.492428354  | 1.406810837 |
| M17 | 15 | 22855000  | 80765000  | 967  | -0.614478157 | 0.65316611  |
| M17 | 15 | 80775000  | 102285000 | 376  | 0.05905441   | 1.041782718 |
| M17 | 16 | 155000    | 19305000  | 291  | 0.776033748  | 1.712416626 |
| M17 | 16 | 19475000  | 33845000  | 196  | 0.492304114  | 1.406689693 |
| M17 | 16 | 34255000  | 90145000  | 778  | -0.690010877 | 0.619849177 |

|     |    |           |           |      |              |             |
|-----|----|-----------|-----------|------|--------------|-------------|
| M17 | 17 | 165000    | 17195000  | 291  | -0.595184993 | 0.661959568 |
| M17 | 17 | 17305000  | 29855000  | 120  | 0.037571266  | 1.026384484 |
| M17 | 17 | 29865000  | 32265000  | 47   | 0.484334608  | 1.398940505 |
| M17 | 17 | 32505000  | 80975000  | 742  | -0.558906575 | 0.678816447 |
| M17 | 18 | 95000     | 47235000  | 775  | 0.106047078  | 1.076275245 |
| M17 | 18 | 47455000  | 77835000  | 534  | -0.546118895 | 0.684860047 |
| M17 | 19 | 305000    | 59045000  | 809  | -0.12878599  | 0.914600752 |
| M17 | 20 | 185000    | 43395000  | 721  | 0.183956954  | 1.135995369 |
| M17 | 20 | 43615000  | 62775000  | 327  | 0.480119763  | 1.394859454 |
| M17 | 21 | 14645000  | 48045000  | 575  | -0.089921543 | 0.939573844 |
| M17 | 22 | 17315000  | 51155000  | 542  | -0.148092764 | 0.902442699 |
| M17 | X  | 2825000   | 152625000 | 2530 | 0.01201438   | 1.008362506 |
| L20 | 1  | 1305000   | 120395000 | 1990 | -0.305384637 | 0.80922644  |
| L20 | 1  | 121305000 | 249185000 | 1727 | 0.235171019  | 1.177046258 |
| L20 | 2  | 165000    | 16245000  | 291  | 0.762848799  | 1.696837958 |
| L20 | 2  | 16455000  | 23135000  | 120  | -0.054078051 | 0.963209782 |
| L20 | 2  | 23145000  | 99195000  | 1202 | 0.229918713  | 1.172768869 |
| L20 | 2  | 99255000  | 243045000 | 2480 | -0.044841375 | 0.969396397 |
| L20 | 3  | 105000    | 96475000  | 1654 | -0.313678597 | 0.804587597 |
| L20 | 3  | 96485000  | 193895000 | 1716 | -0.006247367 | 0.995679018 |
| L20 | 3  | 194075000 | 197795000 | 53   | -0.351705344 | 0.783657225 |
| L20 | 4  | 245000    | 190495000 | 3181 | -0.038863511 | 0.973421462 |
| L20 | 5  | 125000    | 45815000  | 787  | 0.409637809  | 1.328352287 |
| L20 | 5  | 49645000  | 170545000 | 2109 | -0.302717353 | 0.810723938 |
| L20 | 5  | 170725000 | 180665000 | 157  | 0.373412322  | 1.295413175 |
| L20 | 6  | 495000    | 38355000  | 574  | 0.25390201   | 1.192427878 |
| L20 | 6  | 38365000  | 170755000 | 2258 | -0.013252246 | 0.990856303 |
| L20 | 7  | 85000     | 52945000  | 912  | 0.20118447   | 1.149641838 |
| L20 | 7  | 53125000  | 159055000 | 1650 | -0.033603609 | 0.976976924 |
| L20 | 8  | 285000    | 21155000  | 348  | -0.362011229 | 0.77807912  |
| L20 | 8  | 21335000  | 43295000  | 394  | -0.038108715 | 0.973930875 |
| L20 | 8  | 43355000  | 81285000  | 589  | 0.461468971  | 1.376943126 |
| L20 | 8  | 81305000  | 146255000 | 1104 | 0.614859881  | 1.531409254 |
| L20 | 9  | 335000    | 83145000  | 920  | -0.44719782  | 0.733466093 |
| L20 | 9  | 83155000  | 141035000 | 1012 | -0.051606679 | 0.964861198 |
| L20 | 10 | 315000    | 6195000   | 114  | 0.79804125   | 1.738738834 |
| L20 | 10 | 6225000   | 20055000  | 245  | 0.678402964  | 1.600367198 |
| L20 | 10 | 20105000  | 100075000 | 1249 | 0.161370447  | 1.118348978 |
| L20 | 10 | 100305000 | 104235000 | 67   | 0.889895841  | 1.853042334 |
| L20 | 10 | 104235001 | 104664999 | 6    | 1.033606391  | 2.047135206 |
| L20 | 10 | 104665000 | 135365000 | 546  | -0.248324036 | 0.841873843 |
| L20 | 11 | 495000    | 7035000   | 90   | -0.291245974 | 0.817195988 |
| L20 | 11 | 7265000   | 134785000 | 2126 | -0.056850252 | 0.96136071  |
| L20 | 12 | 215000    | 125975000 | 2104 | -0.041714761 | 0.971499554 |
| L20 | 12 | 126155000 | 133495000 | 129  | -0.178126362 | 0.883850113 |
| L20 | 13 | 19265000  | 29695000  | 180  | -0.350620023 | 0.784246982 |
| L20 | 13 | 29855000  | 31665000  | 35   | 0.555617916  | 1.469798023 |
| L20 | 13 | 31755000  | 62645000  | 523  | -0.239541099 | 0.847014693 |

|     |    |           |           |      |              |             |
|-----|----|-----------|-----------|------|--------------|-------------|
| L20 | 13 | 62825000  | 90145000  | 436  | 0.205589261  | 1.153157251 |
| L20 | 13 | 90305000  | 115045000 | 443  | 0.17539134   | 1.129270685 |
| L20 | 14 | 20525000  | 107075000 | 1503 | -0.29086507  | 0.817411774 |
| L20 | 15 | 20155000  | 34935000  | 182  | 0.237422926  | 1.178884948 |
| L20 | 15 | 35215000  | 48265000  | 222  | -0.552206871 | 0.681976121 |
| L20 | 15 | 48595000  | 63775000  | 273  | 0.451434248  | 1.367398974 |
| L20 | 15 | 64105000  | 69625000  | 98   | -0.336017434 | 0.792225237 |
| L20 | 15 | 69805000  | 102245000 | 556  | 0.401476491  | 1.32085902  |
| L20 | 16 | 125000    | 90095000  | 1269 | -0.082980266 | 0.944105333 |
| L20 | 17 | 55000     | 29045000  | 407  | 0.263332806  | 1.200248228 |
| L20 | 17 | 29375000  | 81045000  | 799  | 0.411739155  | 1.330288498 |
| L20 | 18 | 55000     | 32495000  | 512  | -0.038186982 | 0.97387804  |
| L20 | 18 | 32675000  | 77845000  | 798  | -0.312852551 | 0.805048413 |
| L20 | 19 | 255000    | 24395000  | 338  | -0.401490287 | 0.757075829 |
| L20 | 19 | 28355000  | 58995000  | 468  | 0.387177565  | 1.307832305 |
| L20 | 20 | 195000    | 62895000  | 1053 | 0.371776611  | 1.293945283 |
| L20 | 21 | 14405000  | 47975000  | 576  | 0.06356936   | 1.04504811  |
| L20 | 22 | 17205000  | 51175000  | 544  | -0.328251368 | 0.796501306 |
| L20 | X  | 2855000   | 152675000 | 2530 | -0.283752977 | 0.82145134  |
| L4  | 1  | 1305000   | 119405000 | 1975 | 0.208143464  | 1.155200654 |
| L4  | 1  | 119575000 | 189395000 | 735  | 0.440618517  | 1.35718606  |
| L4  | 1  | 189755000 | 230995000 | 685  | 0.168977555  | 1.124261432 |
| L4  | 1  | 231185000 | 248185000 | 313  | 0.316642503  | 1.245428763 |
| L4  | 2  | 55000     | 242995000 | 4097 | -0.007141955 | 0.995061807 |
| L4  | 3  | 215000    | 72505000  | 1322 | 0.004021299  | 1.00279124  |
| L4  | 3  | 72675000  | 197795000 | 2099 | 0.154925223  | 1.11336391  |
| L4  | 4  | 255000    | 190335000 | 3180 | -0.016562119 | 0.988585657 |
| L4  | 5  | 55000     | 136865000 | 2275 | -0.021601631 | 0.98513843  |
| L4  | 5  | 136875000 | 180685000 | 787  | 0.168369861  | 1.123787969 |
| L4  | 6  | 505000    | 17325000  | 307  | -0.012411341 | 0.991434013 |
| L4  | 6  | 17335000  | 41545000  | 317  | 0.222021127  | 1.16636645  |
| L4  | 6  | 41555000  | 63675000  | 314  | 0.321500686  | 1.249629734 |
| L4  | 6  | 63705000  | 170895000 | 1897 | 0.022346962  | 1.015610322 |
| L4  | 7  | 355000    | 159085000 | 2564 | 0.015270114  | 1.01064065  |
| L4  | 8  | 305000    | 37645000  | 650  | -0.009640772 | 0.993339804 |
| L4  | 8  | 37755000  | 54905000  | 228  | 0.161581275  | 1.118512419 |
| L4  | 8  | 55125000  | 146105000 | 1554 | 0.311111396  | 1.24066309  |
| L4  | 9  | 225000    | 21475000  | 388  | 0.301927221  | 1.232790134 |
| L4  | 9  | 21745000  | 140975000 | 1543 | 0.196933351  | 1.14625923  |
| L4  | 10 | 195000    | 32785000  | 593  | 0.217640857  | 1.162830532 |
| L4  | 10 | 32955000  | 135345000 | 1635 | -0.02171441  | 0.985061423 |
| L4  | 11 | 265000    | 36065000  | 595  | 0.007838309  | 1.005447888 |
| L4  | 11 | 36075000  | 108645000 | 1156 | 0.168352013  | 1.123774066 |
| L4  | 11 | 108655000 | 134815000 | 470  | -0.05134501  | 0.965036216 |
| L4  | 12 | 235000    | 44225000  | 670  | 0.158204084  | 1.115897166 |
| L4  | 12 | 44235000  | 98675000  | 925  | 0.016662192  | 1.011616303 |
| L4  | 12 | 98845000  | 133825000 | 639  | 0.202159661  | 1.150419202 |
| L4  | 13 | 19345000  | 50405000  | 539  | 0.007094169  | 1.004929413 |

|     |    |           |           |      |              |             |
|-----|----|-----------|-----------|------|--------------|-------------|
| L4  | 13 | 50415000  | 115045000 | 1085 | 0.16786293   | 1.123393165 |
| L4  | 14 | 19105000  | 107145000 | 1506 | 0.009194733  | 1.006393656 |
| L4  | 15 | 22805000  | 102315000 | 1344 | 0.008401525  | 1.005840483 |
| L4  | 16 | 105000    | 75545000  | 1019 | 0.189355221  | 1.140253992 |
| L4  | 16 | 75635000  | 90025000  | 248  | -0.024703232 | 0.983022789 |
| L4  | 17 | 45000     | 16575000  | 286  | 0.234528202  | 1.176521922 |
| L4  | 17 | 16805000  | 81055000  | 922  | 0.035241045  | 1.02472802  |
| L4  | 18 | 225000    | 15325000  | 269  | 0.044147994  | 1.031074082 |
| L4  | 18 | 15335000  | 39245000  | 358  | 0.206437065  | 1.153835107 |
| L4  | 18 | 39295000  | 77875000  | 684  | 0.013716433  | 1.009552846 |
| L4  | 19 | 305000    | 58905000  | 806  | 0.301820909  | 1.232699293 |
| L4  | 20 | 175000    | 62825000  | 1053 | 0.005111146  | 1.00354906  |
| L4  | 21 | 14645000  | 26715000  | 186  | 0.213085161  | 1.159164374 |
| L4  | 21 | 26725000  | 48005000  | 388  | 0.293326553  | 1.225462683 |
| L4  | 22 | 17225000  | 51125000  | 543  | 0.016456565  | 1.011472127 |
| L4  | X  | 2795000   | 152695000 | 2531 | 0.159054593  | 1.116555213 |
| L21 | 1  | 1305000   | 27705000  | 406  | -0.253408398 | 0.838912124 |
| L21 | 1  | 27715000  | 34825000  | 122  | -0.118441122 | 0.92118248  |
| L21 | 1  | 34835000  | 55125000  | 343  | 0.235129512  | 1.177012394 |
| L21 | 1  | 55155000  | 108145000 | 921  | -0.013842018 | 0.990451325 |
| L21 | 1  | 108205000 | 145195000 | 203  | 0.149808935  | 1.109422535 |
| L21 | 1  | 145405000 | 248865000 | 1722 | 0.520182017  | 1.434136174 |
| L21 | 2  | 55000     | 119215000 | 1946 | 0.193621918  | 1.143631226 |
| L21 | 2  | 119385000 | 126645000 | 127  | 0.017749798  | 1.012379218 |
| L21 | 2  | 126965000 | 128655000 | 30   | 0.22173833   | 1.166137841 |
| L21 | 2  | 128825000 | 224025000 | 1654 | -0.01536625  | 0.989405449 |
| L21 | 2  | 224245000 | 234195000 | 177  | 0.17312557   | 1.127498544 |
| L21 | 2  | 234315000 | 243045000 | 149  | -0.254813215 | 0.838095636 |
| L21 | 3  | 125000    | 154505000 | 2680 | -0.024704359 | 0.983022021 |
| L21 | 3  | 154515000 | 197685000 | 745  | 0.345710292  | 1.270776478 |
| L21 | 4  | 205000    | 40735000  | 684  | -0.249486815 | 0.841195586 |
| L21 | 4  | 40855000  | 48195000  | 128  | 0.651738781  | 1.571060546 |
| L21 | 4  | 48195001  | 52714999  | 16   | 0.932019325  | 1.907944659 |
| L21 | 4  | 52715000  | 62165000  | 165  | 0.017874038  | 1.012466405 |
| L21 | 4  | 62335000  | 63365000  | 16   | -0.407127125 | 0.754123585 |
| L21 | 4  | 63585000  | 127565000 | 1083 | -0.005892441 | 0.995924    |
| L21 | 4  | 127785000 | 129985000 | 40   | -0.46138195  | 0.726290216 |
| L21 | 4  | 130155000 | 150985000 | 360  | -0.079971674 | 0.946076222 |
| L21 | 4  | 150995000 | 162115000 | 194  | -0.178623187 | 0.883545792 |
| L21 | 4  | 162125000 | 164045000 | 32   | 0.014502227  | 1.010102871 |
| L21 | 4  | 164175000 | 175605000 | 188  | 0.220891644  | 1.165453662 |
| L21 | 4  | 175805000 | 182465000 | 103  | -0.158806406 | 0.895765864 |
| L21 | 4  | 182635000 | 184685000 | 37   | 0.215690914  | 1.161259915 |
| L21 | 4  | 184855000 | 190765000 | 109  | -0.158751997 | 0.895799647 |
| L21 | 5  | 185000    | 23005000  | 404  | 0.001791653  | 1.001242651 |
| L21 | 5  | 23175000  | 40245000  | 279  | -0.208886589 | 0.865204702 |
| L21 | 5  | 40415000  | 180625000 | 2369 | -0.018218145 | 0.987451541 |
| L21 | 6  | 445000    | 18235000  | 324  | 0.185453967  | 1.137174747 |

|     |    |           |           |      |              |             |
|-----|----|-----------|-----------|------|--------------|-------------|
| L21 | 6  | 18455000  | 39545000  | 267  | -0.004142449 | 0.997132792 |
| L21 | 6  | 39715000  | 58485000  | 309  | -0.22095954  | 0.857994592 |
| L21 | 6  | 61955000  | 62545000  | 9    | 0.220533171  | 1.165164112 |
| L21 | 6  | 62705000  | 65185000  | 47   | 0.042254762  | 1.029721903 |
| L21 | 6  | 65405000  | 69135000  | 54   | 0.457735662  | 1.373384572 |
| L21 | 6  | 69355000  | 170815000 | 1806 | -0.027701412 | 0.980982012 |
| L21 | 7  | 135000    | 27755000  | 460  | 0.401414084  | 1.320801884 |
| L21 | 7  | 27905000  | 43895000  | 294  | -0.03573754  | 0.975532917 |
| L21 | 7  | 44165000  | 49885000  | 101  | 0.613372906  | 1.529831656 |
| L21 | 7  | 49895000  | 62695000  | 132  | 0.035999313  | 1.02526675  |
| L21 | 7  | 63565000  | 66895000  | 51   | 0.525390319  | 1.439322934 |
| L21 | 7  | 66975000  | 71205000  | 81   | 0.327617869  | 1.254939547 |
| L21 | 7  | 71215000  | 83665000  | 176  | 0.452261573  | 1.368183345 |
| L21 | 7  | 83675000  | 131745000 | 816  | 0.386179537  | 1.306927885 |
| L21 | 7  | 131755000 | 159095000 | 445  | 0.042267893  | 1.029731276 |
| L21 | 8  | 365000    | 42065000  | 726  | -0.539794014 | 0.687869115 |
| L21 | 8  | 42305000  | 93995000  | 819  | 0.016973255  | 1.011834443 |
| L21 | 8  | 94165000  | 123495000 | 510  | 0.387826897  | 1.30842107  |
| L21 | 8  | 123555000 | 146275000 | 378  | 0.312765974  | 1.242086781 |
| L21 | 9  | 255000    | 79745000  | 861  | -0.237003418 | 0.848505892 |
| L21 | 9  | 80115000  | 91575000  | 215  | 0.210224348  | 1.15686807  |
| L21 | 9  | 91585000  | 94195000  | 43   | 0.513472815  | 1.427482259 |
| L21 | 9  | 94355000  | 97535000  | 52   | 0.228918145  | 1.171955788 |
| L21 | 9  | 97705000  | 115115000 | 318  | -0.2396662   | 0.846941248 |
| L21 | 9  | 115125000 | 120095000 | 90   | 0.024341658  | 1.017015494 |
| L21 | 9  | 120265000 | 129445000 | 172  | 0.189489793  | 1.140360358 |
| L21 | 9  | 129515000 | 135875000 | 114  | 0.545528693  | 1.459555118 |
| L21 | 9  | 136145000 | 141025000 | 52   | 0.067286171  | 1.047743936 |
| L21 | 10 | 295000    | 38245000  | 698  | 0.228627798  | 1.171719952 |
| L21 | 10 | 38335000  | 135325000 | 1530 | 0.08218151   | 1.058617574 |
| L21 | 11 | 245000    | 43475000  | 735  | -0.041152951 | 0.971877947 |
| L21 | 11 | 43695000  | 59095000  | 177  | 0.208129765  | 1.155189685 |
| L21 | 11 | 59205000  | 70035000  | 175  | 0.425975706  | 1.343480803 |
| L21 | 11 | 70205000  | 75695000  | 88   | -0.037009252 | 0.97467338  |
| L21 | 11 | 76015000  | 81095000  | 90   | 0.174877418  | 1.128868484 |
| L21 | 11 | 81105000  | 88885000  | 142  | 0.059944307  | 1.042425519 |
| L21 | 11 | 89055000  | 96645000  | 124  | -0.542542341 | 0.686559975 |
| L21 | 11 | 96655000  | 103585000 | 118  | 0.086276219  | 1.061626449 |
| L21 | 11 | 103755000 | 134925000 | 558  | -0.380053925 | 0.768408868 |
| L21 | 12 | 395000    | 120295000 | 2005 | 0.0038418    | 1.002666482 |
| L21 | 12 | 120305000 | 124335000 | 69   | 0.169004584  | 1.124282496 |
| L21 | 12 | 124455000 | 133845000 | 159  | -0.018224268 | 0.98744735  |
| L21 | 13 | 19365000  | 21745000  | 36   | 0.124375307  | 1.090035641 |
| L21 | 13 | 21915000  | 114995000 | 1584 | 0.0078545    | 1.005459172 |
| L21 | 14 | 20465000  | 107245000 | 1506 | -0.003292536 | 0.99772039  |
| L21 | 15 | 20095000  | 35465000  | 188  | -0.179482903 | 0.883019435 |
| L21 | 15 | 35555000  | 45035000  | 159  | -0.129323375 | 0.914260139 |
| L21 | 15 | 45045000  | 52305000  | 127  | -0.182399192 | 0.881236287 |

|     |    |           |           |      |              |             |
|-----|----|-----------|-----------|------|--------------|-------------|
| L21 | 15 | 52475000  | 56505000  | 75   | 0.710893784  | 1.636817851 |
| L21 | 15 | 56675000  | 65085000  | 147  | 0.058710601  | 1.04153448  |
| L21 | 15 | 65105000  | 72025000  | 126  | -0.218944864 | 0.85919359  |
| L21 | 15 | 72105000  | 74655000  | 40   | 0.051746362  | 1.036518856 |
| L21 | 15 | 74825000  | 91105000  | 265  | 0.320694836  | 1.248931919 |
| L21 | 15 | 91155000  | 96485000  | 97   | 0.035691773  | 1.025048217 |
| L21 | 15 | 96495000  | 102255000 | 107  | -0.173401397 | 0.886749553 |
| L21 | 16 | 125000    | 11205000  | 174  | 0.380240003  | 1.301558361 |
| L21 | 16 | 11215000  | 22445000  | 170  | 0.419919905  | 1.337853279 |
| L21 | 16 | 22715000  | 31855000  | 144  | 0.350302635  | 1.274828021 |
| L21 | 16 | 34225000  | 89985000  | 776  | -0.24002431  | 0.846731044 |
| L21 | 17 | 5000      | 15765000  | 275  | 0.014673584  | 1.010222853 |
| L21 | 17 | 15905000  | 31935000  | 180  | 0.452255625  | 1.368177704 |
| L21 | 17 | 32105000  | 35935000  | 58   | 0.639500704  | 1.557789938 |
| L21 | 17 | 35935001  | 36454999  | 5    | 0.957879112  | 1.94245222  |
| L21 | 17 | 36455000  | 43195000  | 78   | 0.321308054  | 1.249462891 |
| L21 | 17 | 43365000  | 52735000  | 135  | 0.481532645  | 1.396226158 |
| L21 | 17 | 52745000  | 56625000  | 70   | 0.320549169  | 1.248805823 |
| L21 | 17 | 56895000  | 68445000  | 192  | 0.451247836  | 1.367222302 |
| L21 | 17 | 68505000  | 77245000  | 154  | 0.344705156  | 1.269891428 |
| L21 | 17 | 77805000  | 81095000  | 48   | 0.446348264  | 1.362586921 |
| L21 | 18 | 265000    | 75605000  | 1271 | -0.016718772 | 0.988478319 |
| L21 | 18 | 75905000  | 77785000  | 35   | 0.521370565  | 1.435318158 |
| L21 | 19 | 305000    | 59095000  | 810  | -0.034110577 | 0.976633671 |
| L21 | 20 | 165000    | 32445000  | 523  | 0.32125859   | 1.249420053 |
| L21 | 20 | 32595000  | 38445000  | 105  | 0.421141037  | 1.338986149 |
| L21 | 20 | 38615000  | 50645000  | 223  | -0.043325408 | 0.970415562 |
| L21 | 20 | 50735000  | 62855000  | 196  | -0.225664711 | 0.855200908 |
| L21 | 21 | 14605000  | 47995000  | 575  | 0.177878173  | 1.131218934 |
| L21 | 22 | 16905000  | 25345000  | 109  | 0.167646199  | 1.123224414 |
| L21 | 22 | 25505000  | 51115000  | 432  | 0.302687896  | 1.233440305 |
| L21 | X  | 2785000   | 45385000  | 764  | -0.249936431 | 0.840933468 |
| L21 | X  | 45555000  | 152695000 | 1764 | 0.001981844  | 1.001374654 |
| L9  | 1  | 1305000   | 8965000   | 104  | 0.265932122  | 1.202412675 |
| L9  | 1  | 9135000   | 10605000  | 23   | 0.065198473  | 1.04622886  |
| L9  | 1  | 10925000  | 30565000  | 323  | -0.264830715 | 0.83229639  |
| L9  | 1  | 30575000  | 69695000  | 680  | 0.017282047  | 1.012051038 |
| L9  | 1  | 69805000  | 90185000  | 367  | 0.253196331  | 1.191844757 |
| L9  | 1  | 90405000  | 105495000 | 239  | 0.012353375  | 1.008599472 |
| L9  | 1  | 105655000 | 115595000 | 161  | -0.308049661 | 0.807732973 |
| L9  | 1  | 115755000 | 119275000 | 61   | -0.007941817 | 0.994510276 |
| L9  | 1  | 119495000 | 164045000 | 289  | 0.500927769  | 1.415123308 |
| L9  | 1  | 164215000 | 204615000 | 672  | 0.008177332  | 1.005684189 |
| L9  | 1  | 204785000 | 248175000 | 773  | 0.273556333  | 1.208783886 |
| L9  | 2  | 45000     | 33065000  | 591  | 0.006536908  | 1.00454132  |
| L9  | 2  | 33285000  | 85765000  | 918  | 0.274688501  | 1.209732862 |
| L9  | 2  | 85935000  | 242965000 | 2579 | -0.01151317  | 0.992051437 |
| L9  | 3  | 185000    | 5885000   | 112  | 0.18325702   | 1.135444367 |

|    |    |           |           |      |              |             |
|----|----|-----------|-----------|------|--------------|-------------|
| L9 | 3  | 5895000   | 45575000  | 717  | 0.025739478  | 1.018001353 |
| L9 | 3  | 45745000  | 70235000  | 445  | -0.306474229 | 0.808615504 |
| L9 | 3  | 70305000  | 103275000 | 503  | -0.020575707 | 0.985839227 |
| L9 | 3  | 103285000 | 176195000 | 1271 | 0.260117481  | 1.197576221 |
| L9 | 3  | 176225000 | 194075000 | 320  | 0.016321362  | 1.011377341 |
| L9 | 3  | 194205000 | 197755000 | 50   | -0.246931438 | 0.842686876 |
| L9 | 4  | 105000    | 58835000  | 945  | -0.327843032 | 0.796726777 |
| L9 | 4  | 58845000  | 68395000  | 155  | -0.061618461 | 0.95818859  |
| L9 | 4  | 68605000  | 84935000  | 276  | -0.307378679 | 0.808108729 |
| L9 | 4  | 85155000  | 108355000 | 400  | -0.007065653 | 0.995114436 |
| L9 | 4  | 108505000 | 190795000 | 1401 | -0.333164019 | 0.79379368  |
| L9 | 5  | 175000    | 45845000  | 787  | -0.001057893 | 0.999266993 |
| L9 | 5  | 49555000  | 145035000 | 1634 | -0.315025991 | 0.803836509 |
| L9 | 5  | 145205000 | 180595000 | 633  | -0.05244366  | 0.964301595 |
| L9 | 6  | 235000    | 3975000   | 67   | -0.287036218 | 0.819584032 |
| L9 | 6  | 4145000   | 41215000  | 550  | 0.051278733  | 1.036182938 |
| L9 | 6  | 41385000  | 146885000 | 1778 | 0.254178161  | 1.192656146 |
| L9 | 6  | 147255000 | 157895000 | 197  | -0.001190036 | 0.99917547  |
| L9 | 6  | 158065000 | 170865000 | 231  | -0.319427651 | 0.801387743 |
| L9 | 7  | 335000    | 22825000  | 368  | 0.008040982  | 1.005589146 |
| L9 | 7  | 22995000  | 48305000  | 460  | -0.298953694 | 0.812841692 |
| L9 | 7  | 48475000  | 76935000  | 363  | -0.01862942  | 0.987170084 |
| L9 | 7  | 77105000  | 143125000 | 1108 | 0.232682483  | 1.175017695 |
| L9 | 7  | 143795000 | 150645000 | 116  | -0.028704313 | 0.980300312 |
| L9 | 7  | 151005000 | 159015000 | 133  | 0.252223572  | 1.191041409 |
| L9 | 8  | 235000    | 27605000  | 466  | -0.338547275 | 0.790837247 |
| L9 | 8  | 27775000  | 61945000  | 539  | -0.00294959  | 0.997957589 |
| L9 | 8  | 61985000  | 63285000  | 23   | -0.316017927 | 0.803284015 |
| L9 | 8  | 63455000  | 80935000  | 296  | -0.028050022 | 0.980744999 |
| L9 | 8  | 81155000  | 103595000 | 392  | 0.286032465  | 1.219282531 |
| L9 | 8  | 103795000 | 115035000 | 182  | 0.438202901  | 1.35491552  |
| L9 | 8  | 115455000 | 121765000 | 114  | 0.241245874  | 1.182012976 |
| L9 | 8  | 121935000 | 124685000 | 54   | -0.000463454 | 0.99967881  |
| L9 | 8  | 124855000 | 146075000 | 350  | 0.260036976  | 1.197509396 |
| L9 | 9  | 5945000   | 21045000  | 276  | 0.6025411    | 1.518388636 |
| L9 | 9  | 21245000  | 93075000  | 719  | 0.03242606   | 1.022730521 |
| L9 | 9  | 93345000  | 136885000 | 785  | -0.291045836 | 0.817309361 |
| L9 | 9  | 137155000 | 141005000 | 39   | 0.012591095  | 1.008765677 |
| L9 | 10 | 105000    | 14095000  | 266  | 0.241265699  | 1.18202922  |
| L9 | 10 | 14105000  | 65995000  | 787  | -0.003468757 | 0.997598529 |
| L9 | 10 | 66205000  | 135375000 | 1178 | -0.309373215 | 0.806992284 |
| L9 | 11 | 295000    | 22305000  | 361  | -0.305522126 | 0.809149324 |
| L9 | 11 | 22475000  | 64455000  | 638  | -0.005732268 | 0.996034578 |
| L9 | 11 | 64675000  | 89125000  | 417  | 0.253630474  | 1.192203467 |
| L9 | 11 | 89345000  | 134925000 | 798  | -0.037415139 | 0.974399205 |
| L9 | 12 | 395000    | 3685000   | 51   | 0.325056206  | 1.252713242 |
| L9 | 12 | 3855000   | 26385000  | 376  | 0.016609488  | 1.011579347 |
| L9 | 12 | 26605000  | 133495000 | 1800 | -0.310111113 | 0.806579636 |



|     |    |           |           |      |              |             |
|-----|----|-----------|-----------|------|--------------|-------------|
| L9  | 13 | 19255000  | 29345000  | 173  | -0.298951399 | 0.812842984 |
| L9  | 13 | 29355000  | 42935000  | 239  | -0.091548641 | 0.938514773 |
| L9  | 13 | 42945000  | 94735000  | 853  | -0.333526377 | 0.79359433  |
| L9  | 13 | 94855000  | 115095000 | 360  | 0.002043006  | 1.001417107 |
| L9  | 14 | 19115000  | 31715000  | 192  | -0.149041566 | 0.901849395 |
| L9  | 14 | 31885000  | 48545000  | 279  | -0.311338255 | 0.805893859 |
| L9  | 14 | 49015000  | 60245000  | 205  | 0.031102248  | 1.021792497 |
| L9  | 14 | 60325000  | 80845000  | 368  | -0.230429992 | 0.852380804 |
| L9  | 14 | 81005000  | 107235000 | 452  | 0.011192681  | 1.007788348 |
| L9  | 15 | 22855000  | 102255000 | 1342 | -0.284211159 | 0.821190499 |
| L9  | 16 | 125000    | 68955000  | 910  | 0.001527005  | 1.001058999 |
| L9  | 16 | 69125000  | 88265000  | 339  | -0.288937199 | 0.81850481  |
| L9  | 17 | 135000    | 19395000  | 319  | -0.272468063 | 0.827902016 |
| L9  | 17 | 19545000  | 54525000  | 448  | -0.144821795 | 0.904491095 |
| L9  | 17 | 54535000  | 81025000  | 437  | -0.017354602 | 0.988042769 |
| L9  | 18 | 195000    | 24895000  | 380  | 0.012689668  | 1.008834604 |
| L9  | 18 | 25005000  | 77795000  | 928  | -0.326802211 | 0.797301777 |
| L9  | 19 | 265000    | 59085000  | 811  | 0.026907559  | 1.018825913 |
| L9  | 20 | 255000    | 33845000  | 542  | -0.005666718 | 0.996079834 |
| L9  | 20 | 34005000  | 47445000  | 249  | -0.305411197 | 0.809211542 |
| L9  | 20 | 47605000  | 62755000  | 253  | 0.043754678  | 1.030793024 |
| L9  | 21 | 14425000  | 48015000  | 576  | 0.030237318  | 1.021180092 |
| L9  | 22 | 17235000  | 51145000  | 542  | 0.027798904  | 1.019455572 |
| L9  | X  | 2815000   | 107455000 | 1721 | -0.013136925 | 0.99093551  |
| L9  | X  | 107465000 | 152555000 | 807  | -0.33857623  | 0.790821374 |
| L19 | 1  | 1305000   | 24015000  | 343  | -0.178748409 | 0.883469106 |
| L19 | 1  | 24195000  | 106985000 | 1423 | 0.053262428  | 1.037608662 |
| L19 | 1  | 107055000 | 121255000 | 221  | -0.184429517 | 0.879996983 |
| L19 | 1  | 121265000 | 248185000 | 1726 | 0.001540696  | 1.0010685   |
| L19 | 2  | 65000     | 32015000  | 573  | -0.112253721 | 0.925141712 |
| L19 | 2  | 32025000  | 242995000 | 3524 | -0.013922554 | 0.990396037 |
| L19 | 3  | 165000    | 89805000  | 1601 | -0.18319252  | 0.880751834 |
| L19 | 3  | 89815000  | 197645000 | 1822 | -0.001423196 | 0.999014002 |
| L19 | 4  | 105000    | 94025000  | 1536 | 0.001354369  | 1.000939218 |
| L19 | 4  | 94355000  | 190765000 | 1646 | -0.207003367 | 0.866334835 |
| L19 | 5  | 195000    | 49635000  | 789  | 0.010911057  | 1.00759164  |
| L19 | 5  | 49645000  | 169095000 | 2082 | -0.184114425 | 0.8801892   |
| L19 | 5  | 169315000 | 180595000 | 183  | 0.332667799  | 1.259339966 |
| L19 | 6  | 205000    | 11405000  | 200  | 0.061218414  | 1.043346537 |
| L19 | 6  | 11585000  | 18045000  | 119  | 0.255704366  | 1.193918507 |
| L19 | 6  | 18065000  | 170765000 | 2512 | 0.025478347  | 1.017817109 |
| L19 | 7  | 95000     | 8985000   | 132  | -0.194382696 | 0.873946762 |
| L19 | 7  | 9215000   | 51945000  | 759  | 0.22578933   | 1.169416887 |
| L19 | 7  | 52155000  | 158965000 | 1666 | 0.044843114  | 1.031570995 |
| L19 | 8  | 195000    | 33615000  | 577  | -0.265819093 | 0.831726386 |
| L19 | 8  | 33795000  | 56365000  | 328  | -0.055159913 | 0.962487752 |
| L19 | 8  | 56455000  | 97905000  | 711  | 0.253595395  | 1.192174479 |
| L19 | 8  | 97915000  | 100865000 | 54   | -0.239848711 | 0.846834111 |

|     |    |           |           |      |              |             |
|-----|----|-----------|-----------|------|--------------|-------------|
| L19 | 8  | 101045000 | 142245000 | 725  | 0.219195067  | 1.16408392  |
| L19 | 8  | 142255000 | 146275000 | 38   | 0.01016543   | 1.007071022 |
| L19 | 9  | 355000    | 36885000  | 662  | -0.201032565 | 0.869927716 |
| L19 | 9  | 36895000  | 140915000 | 1267 | -0.048794157 | 0.966744022 |
| L19 | 10 | 145000    | 42985000  | 713  | 0.039732315  | 1.027923083 |
| L19 | 10 | 43215000  | 135395000 | 1517 | -0.190147696 | 0.876515984 |
| L19 | 11 | 295000    | 16135000  | 255  | -0.148314616 | 0.902303936 |
| L19 | 11 | 16205000  | 20655000  | 77   | 0.007754212  | 1.00538928  |
| L19 | 11 | 20885000  | 39225000  | 315  | -0.133211379 | 0.911799562 |
| L19 | 11 | 39405000  | 130745000 | 1492 | -0.067455049 | 0.954319959 |
| L19 | 11 | 130815000 | 134855000 | 73   | -0.134244024 | 0.911147152 |
| L19 | 12 | 305000    | 39615000  | 589  | 0.062133527  | 1.04400855  |
| L19 | 12 | 39625000  | 133475000 | 1646 | -0.18091961  | 0.882140518 |
| L19 | 13 | 19255000  | 115085000 | 1627 | -0.013383974 | 0.990765835 |
| L19 | 14 | 20505000  | 107095000 | 1503 | -0.02070848  | 0.985748503 |
| L19 | 15 | 20175000  | 29425000  | 101  | -0.288041861 | 0.819012933 |
| L19 | 15 | 29605000  | 86195000  | 947  | -0.022371264 | 0.984613029 |
| L19 | 15 | 86285000  | 102345000 | 293  | -0.167018431 | 0.890681522 |
| L19 | 16 | 275000    | 34975000  | 501  | 0.001200958  | 1.000832787 |
| L19 | 16 | 46555000  | 90135000  | 764  | -0.198012644 | 0.871750599 |
| L19 | 17 | 155000    | 21075000  | 347  | -0.188598438 | 0.877457748 |
| L19 | 17 | 21855000  | 34815000  | 145  | 0.020229236  | 1.014120605 |
| L19 | 17 | 35045000  | 80995000  | 707  | 0.002133416  | 1.001479865 |
| L19 | 18 | 175000    | 18745000  | 272  | 0.148890608  | 1.108716572 |
| L19 | 18 | 18865000  | 77825000  | 1038 | -0.205775646 | 0.867072392 |
| L19 | 19 | 305000    | 7595000   | 79   | -0.163848672 | 0.892640598 |
| L19 | 19 | 7755000   | 10045000  | 35   | 0.283159178  | 1.216856611 |
| L19 | 19 | 10155000  | 24295000  | 218  | 0.063892419  | 1.045282151 |
| L19 | 19 | 28255000  | 35975000  | 139  | -0.243865948 | 0.844479351 |
| L19 | 19 | 36305000  | 58975000  | 328  | 0.154224769  | 1.112823483 |
| L19 | 20 | 205000    | 62855000  | 1052 | 0.036729583  | 1.025785856 |
| L19 | 21 | 14685000  | 48095000  | 575  | -0.152743925 | 0.899537964 |
| L19 | 22 | 17355000  | 33895000  | 259  | -0.212660995 | 0.862944095 |
| L19 | 22 | 34075000  | 41915000  | 135  | 0.249729475  | 1.188984143 |
| L19 | 22 | 42095000  | 51165000  | 140  | -0.185226289 | 0.879511113 |
| L19 | X  | 2855000   | 57895000  | 957  | -0.13818987  | 0.908658522 |
| L19 | X  | 57905000  | 152555000 | 1570 | -0.042215317 | 0.971162542 |
| L10 | 1  | 1305000   | 120275000 | 1988 | 0.002768236  | 1.001920637 |
| L10 | 1  | 120285000 | 249185000 | 1732 | 0.252622179  | 1.191370531 |
| L10 | 2  | 5000      | 242995000 | 4098 | 0.004930738  | 1.003423574 |
| L10 | 3  | 215000    | 197695000 | 3423 | 0.225452306  | 1.169143734 |
| L10 | 4  | 215000    | 190495000 | 3182 | -0.003347705 | 0.997682238 |
| L10 | 5  | 105000    | 42565000  | 731  | 0.228764918  | 1.171831322 |
| L10 | 5  | 42835000  | 180675000 | 2326 | 0.00681815   | 1.004737167 |
| L10 | 6  | 495000    | 65645000  | 975  | 0.242421119  | 1.182976258 |
| L10 | 6  | 65705000  | 170795000 | 1858 | -0.284108204 | 0.821249104 |
| L10 | 7  | 115000    | 55995000  | 963  | 0.230987542  | 1.173638044 |
| L10 | 7  | 56005000  | 158945000 | 1600 | 0.002959307  | 1.002053341 |

|     |    |           |           |      |              |             |
|-----|----|-----------|-----------|------|--------------|-------------|
| L10 | 8  | 165000    | 17655000  | 284  | -0.013053727 | 0.990992657 |
| L10 | 8  | 17975000  | 25065000  | 132  | -0.287434418 | 0.819357849 |
| L10 | 8  | 25075000  | 146275000 | 2025 | -0.008531137 | 0.994104116 |
| L10 | 9  | 255000    | 141035000 | 1934 | 0.003874267  | 1.002689046 |
| L10 | 10 | 305000    | 135415000 | 2231 | -0.003144445 | 0.99782281  |
| L10 | 11 | 255000    | 134855000 | 2222 | 0.004210757  | 1.002922938 |
| L10 | 12 | 325000    | 133845000 | 2237 | -0.000558307 | 0.999613086 |
| L10 | 13 | 19255000  | 114945000 | 1624 | 0.007866874  | 1.005467796 |
| L10 | 14 | 19115000  | 107245000 | 1507 | -0.005114536 | 0.99646115  |
| L10 | 15 | 20185000  | 102285000 | 1344 | -0.004113825 | 0.997152576 |
| L10 | 16 | 155000    | 90145000  | 1269 | 0.21411212   | 1.159989801 |
| L10 | 17 | 165000    | 17715000  | 300  | -0.24763888  | 0.842273756 |
| L10 | 17 | 17725000  | 81005000  | 906  | -0.0127276   | 0.991216701 |
| L10 | 18 | 175000    | 77845000  | 1312 | 0.014574418  | 1.010153417 |
| L10 | 19 | 315000    | 58945000  | 807  | -0.017660105 | 0.987833565 |
| L10 | 20 | 155000    | 62785000  | 1052 | 0.244618231  | 1.184779211 |
| L10 | 21 | 14605000  | 48015000  | 575  | 0.216658206  | 1.162038772 |
| L10 | 22 | 17335000  | 51105000  | 540  | -0.03110294  | 0.978671817 |
| L10 | X  | 2825000   | 152575000 | 2529 | -0.332021725 | 0.794422437 |
| M11 | 1  | 1305000   | 145625000 | 2001 | -0.157799393 | 0.896391334 |
| M11 | 1  | 146545000 | 249195000 | 1716 | 0.470790136  | 1.385868274 |
| M11 | 2  | 35000     | 242955000 | 4096 | -0.021254726 | 0.985375341 |
| M11 | 3  | 175000    | 197655000 | 3423 | -0.038578549 | 0.973613752 |
| M11 | 4  | 155000    | 43045000  | 726  | 0.050029285  | 1.035285939 |
| M11 | 4  | 43165000  | 70245000  | 390  | 0.354241329  | 1.278313177 |
| M11 | 4  | 70255000  | 168895000 | 1693 | 0.059107096  | 1.041820764 |
| M11 | 4  | 169065000 | 190705000 | 369  | 0.094899415  | 1.067990945 |
| M11 | 5  | 55000     | 59595000  | 971  | 0.448861191  | 1.364962382 |
| M11 | 5  | 59765000  | 180595000 | 2086 | -0.04726375  | 0.967770085 |
| M11 | 6  | 225000    | 49405000  | 759  | 0.127503863  | 1.092402002 |
| M11 | 6  | 49575000  | 57095000  | 130  | 0.824277065  | 1.770647544 |
| M11 | 6  | 57665000  | 140895000 | 1399 | 0.169608838  | 1.124753486 |
| M11 | 6  | 140945000 | 170795000 | 541  | -0.351174023 | 0.783945886 |
| M11 | 7  | 105000    | 63435000  | 996  | 0.210657556  | 1.157215503 |
| M11 | 7  | 63805000  | 159095000 | 1567 | 0.031734129  | 1.022240127 |
| M11 | 8  | 195000    | 36735000  | 635  | -0.354247661 | 0.78227748  |
| M11 | 8  | 36955000  | 38675000  | 34   | 0.423780636  | 1.341438241 |
| M11 | 8  | 38685000  | 62625000  | 350  | -0.013264385 | 0.990847966 |
| M11 | 8  | 62635000  | 70875000  | 143  | 0.197725631  | 1.14688889  |
| M11 | 8  | 71145000  | 125545000 | 934  | 0.986394609  | 1.98122758  |
| M11 | 8  | 125545001 | 125814999 | 5    | 1.074155032  | 2.105488553 |
| M11 | 8  | 125815000 | 146145000 | 334  | -0.135009125 | 0.910664074 |
| M11 | 9  | 265000    | 15195000  | 275  | 0.169273987  | 1.12449246  |
| M11 | 9  | 15335000  | 27695000  | 223  | -0.237035866 | 0.848486808 |
| M11 | 9  | 27755000  | 140925000 | 1430 | 0.186182772  | 1.137749358 |
| M11 | 10 | 145000    | 135445000 | 2234 | 0.052119729  | 1.03678714  |
| M11 | 11 | 455000    | 17045000  | 270  | -0.349616602 | 0.78479263  |
| M11 | 11 | 17395000  | 36945000  | 339  | 0.965030107  | 1.952104259 |

|     |    |           |           |      |              |             |
|-----|----|-----------|-----------|------|--------------|-------------|
| M11 | 11 | 37115000  | 71515000  | 496  | 0.051171683  | 1.036106055 |
| M11 | 11 | 71685000  | 134945000 | 1108 | -0.328930022 | 0.796126714 |
| M11 | 12 | 395000    | 116045000 | 1926 | 0.05471229   | 1.038651949 |
| M11 | 12 | 116165000 | 133765000 | 305  | 0.196116839  | 1.145610673 |
| M11 | 13 | 19255000  | 79645000  | 1018 | -0.334439227 | 0.79309235  |
| M11 | 13 | 79865000  | 115075000 | 606  | 0.172765376  | 1.127217079 |
| M11 | 14 | 20545000  | 49935000  | 492  | 0.289729517  | 1.222411073 |
| M11 | 14 | 49945000  | 107095000 | 1010 | -0.314217362 | 0.804287185 |
| M11 | 15 | 20165000  | 79585000  | 948  | 0.048570752  | 1.034239816 |
| M11 | 15 | 79755000  | 102365000 | 395  | 0.573353174  | 1.487977978 |
| M11 | 16 | 285000    | 90135000  | 1267 | 0.181447446  | 1.134021071 |
| M11 | 17 | 5000      | 11355000  | 192  | -0.337709695 | 0.791296513 |
| M11 | 17 | 11525000  | 45915000  | 426  | 0.521708928  | 1.43565483  |
| M11 | 17 | 46085000  | 81075000  | 586  | 0.194863839  | 1.144616127 |
| M11 | 18 | 155000    | 46395000  | 759  | -0.018435747 | 0.987302615 |
| M11 | 18 | 46465000  | 74105000  | 484  | 0.227225028  | 1.170581211 |
| M11 | 18 | 74325000  | 77865000  | 64   | -0.19615836  | 0.872871774 |
| M11 | 19 | 255000    | 59025000  | 810  | 0.220737245  | 1.16532894  |
| M11 | 20 | 245000    | 3245000   | 55   | -0.303194481 | 0.81045586  |
| M11 | 20 | 3405000   | 13565000  | 187  | 0.422851263  | 1.340574376 |
| M11 | 20 | 13735000  | 16955000  | 60   | -0.010208027 | 0.992949308 |
| M11 | 20 | 17125000  | 62895000  | 740  | 0.488556151  | 1.40304001  |
| M11 | 21 | 14665000  | 48085000  | 576  | 0.020745674  | 1.014483693 |
| M11 | 22 | 17355000  | 51145000  | 541  | 0.091362897  | 1.065376156 |
| M11 | X  | 2705000   | 152665000 | 2532 | -0.093805904 | 0.937047506 |
| L18 | 1  | 1305000   | 248165000 | 3717 | 0.021160727  | 1.014775594 |
| L18 | 2  | 5000      | 242895000 | 4096 | -0.000630796 | 0.999562861 |
| L18 | 3  | 125000    | 197685000 | 3425 | 0.001563032  | 1.001083998 |
| L18 | 4  | 205000    | 68085000  | 1093 | -0.038637649 | 0.973573869 |
| L18 | 4  | 68105000  | 77285000  | 148  | 0.197558505  | 1.146756039 |
| L18 | 4  | 77295000  | 153645000 | 1314 | -0.006779098 | 0.99531211  |
| L18 | 4  | 153645001 | 154224999 | 10   | 0.483537546  | 1.39816783  |
| L18 | 4  | 154225000 | 160095000 | 105  | 0.237308404  | 1.17879137  |
| L18 | 4  | 160205000 | 190795000 | 512  | 0.053969605  | 1.038117399 |
| L18 | 5  | 165000    | 180525000 | 3057 | -0.000810899 | 0.999438085 |
| L18 | 6  | 205000    | 102595000 | 1605 | -0.00433194  | 0.997001831 |
| L18 | 6  | 102655000 | 130405000 | 493  | 0.323094087  | 1.251010664 |
| L18 | 6  | 130585000 | 170895000 | 735  | 0.024676499  | 1.017251565 |
| L18 | 7  | 85000     | 159045000 | 2565 | 0.009298949  | 1.006466357 |
| L18 | 8  | 275000    | 146295000 | 2442 | 0.02933536   | 1.020541861 |
| L18 | 9  | 355000    | 141045000 | 1932 | 0.013603895  | 1.009474099 |
| L18 | 10 | 195000    | 135295000 | 2230 | 0.010179414  | 1.007080783 |
| L18 | 11 | 275000    | 134895000 | 2223 | -0.00914874  | 0.993678641 |
| L18 | 12 | 1305000   | 133845000 | 2221 | 0.001596702  | 1.001107362 |
| L18 | 13 | 19255000  | 115065000 | 1626 | -0.013836603 | 0.990455042 |
| L18 | 14 | 20455000  | 107065000 | 1503 | -0.004524496 | 0.996868771 |
| L18 | 15 | 20095000  | 102385000 | 1347 | 0.004937553  | 1.003428314 |
| L18 | 16 | 155000    | 90035000  | 1267 | -0.020683391 | 0.985765646 |

|     |    |           |           |      |              |             |
|-----|----|-----------|-----------|------|--------------|-------------|
| L18 | 17 | 65000     | 26215000  | 372  | -0.046905392 | 0.968010504 |
| L18 | 17 | 26495000  | 40655000  | 186  | 0.277627486  | 1.21219978  |
| L18 | 17 | 40705000  | 81045000  | 646  | -0.005419714 | 0.996250388 |
| L18 | 18 | 225000    | 77875000  | 1312 | -0.051431588 | 0.964978305 |
| L18 | 19 | 355000    | 15635000  | 204  | 0.143505588  | 1.104585878 |
| L18 | 19 | 15645000  | 59015000  | 603  | 0.055568438  | 1.039268506 |
| L18 | 20 | 155000    | 62855000  | 1053 | -0.006360256 | 0.99560111  |
| L18 | 21 | 14685000  | 48045000  | 574  | -0.000348976 | 0.999758137 |
| L18 | 22 | 17325000  | 51185000  | 543  | 0.006122001  | 1.004252464 |
| L18 | X  | 2865000   | 152625000 | 2529 | -0.036990624 | 0.974685965 |
| L11 | 1  | 1305000   | 121255000 | 1992 | -0.117016605 | 0.922092505 |
| L11 | 1  | 145175000 | 240605000 | 1582 | 0.617390837  | 1.534098202 |
| L11 | 1  | 240825000 | 248105000 | 135  | 0.615350676  | 1.531930318 |
| L11 | 2  | 55000     | 243045000 | 4098 | -0.143596202 | 0.905259802 |
| L11 | 3  | 105000    | 197685000 | 3425 | 0.04192946   | 1.029489746 |
| L11 | 4  | 205000    | 139045000 | 2287 | -0.056643133 | 0.961498736 |
| L11 | 4  | 139305000 | 190785000 | 895  | 0.395686262  | 1.315568402 |
| L11 | 5  | 205000    | 180575000 | 3057 | 0.044394851  | 1.031250523 |
| L11 | 6  | 245000    | 66995000  | 993  | 0.07257144   | 1.051589352 |
| L11 | 6  | 67165000  | 170865000 | 1841 | -0.69437349  | 0.617977626 |
| L11 | 7  | 335000    | 158975000 | 2562 | 0.018494632  | 1.012902024 |
| L11 | 8  | 195000    | 28275000  | 480  | -0.633839667 | 0.644458933 |
| L11 | 8  | 28445000  | 146095000 | 1957 | 0.062786449  | 1.044481145 |
| L11 | 9  | 215000    | 141045000 | 1935 | -0.684683134 | 0.622142456 |
| L11 | 10 | 315000    | 92995000  | 1494 | 0.045430505  | 1.031991083 |
| L11 | 10 | 93155000  | 103665000 | 171  | 0.440836038  | 1.357390704 |
| L11 | 10 | 103835000 | 107955000 | 76   | -0.691114391 | 0.619375237 |
| L11 | 10 | 108125000 | 112295000 | 80   | 0.445080367  | 1.361389953 |
| L11 | 10 | 112465000 | 114465000 | 36   | -0.740073848 | 0.598708705 |
| L11 | 10 | 114635000 | 117895000 | 57   | 0.488076484  | 1.402573605 |
| L11 | 10 | 118065000 | 135285000 | 296  | -0.621631887 | 0.649935345 |
| L11 | 11 | 205000    | 67085000  | 1051 | 0.010078975  | 1.007010673 |
| L11 | 11 | 67085001  | 70454999  | 49   | 2.074533566  | 4.212082127 |
| L11 | 11 | 70455000  | 134865000 | 1123 | -0.680777529 | 0.623828976 |
| L11 | 12 | 335000    | 6725000   | 109  | 0.505935131  | 1.420043507 |
| L11 | 12 | 7045000   | 15795000  | 137  | -0.615873322 | 0.652534768 |
| L11 | 12 | 16065000  | 18295000  | 39   | -0.04015844  | 0.972548134 |
| L11 | 12 | 18385000  | 23665000  | 88   | -0.671435231 | 0.627881743 |
| L11 | 12 | 23885000  | 133845000 | 1850 | -0.032156249 | 0.977957551 |
| L11 | 13 | 19355000  | 115045000 | 1624 | 0.005691405  | 1.003952773 |
| L11 | 14 | 20515000  | 107125000 | 1504 | 0.05101717   | 1.035995093 |
| L11 | 15 | 20195000  | 102395000 | 1346 | 0.058509561  | 1.041389352 |
| L11 | 16 | 275000    | 15795000  | 247  | 0.508823469  | 1.422889343 |
| L11 | 16 | 15965000  | 50545000  | 325  | 0.032030195  | 1.02244993  |
| L11 | 16 | 50715000  | 90055000  | 688  | -0.681144093 | 0.623670492 |
| L11 | 17 | 75000     | 19525000  | 324  | -0.620656499 | 0.650374907 |
| L11 | 17 | 19695000  | 81095000  | 883  | 0.079370474  | 1.056556907 |
| L11 | 18 | 205000    | 77895000  | 1312 | -0.015626087 | 0.989227268 |

|     |    |           |           |      |              |             |
|-----|----|-----------|-----------|------|--------------|-------------|
| L11 | 19 | 335000    | 59025000  | 808  | 0.080590557  | 1.057450812 |
| L11 | 20 | 155000    | 62755000  | 1051 | 0.055328851  | 1.03909593  |
| L11 | 21 | 14425000  | 48095000  | 578  | 0.023496017  | 1.016419541 |
| L11 | 22 | 17365000  | 51165000  | 541  | -0.645665139 | 0.639198027 |
| L11 | X  | 2755000   | 152655000 | 2531 | -0.003459    | 0.997605276 |
| L5  | 1  | 1305000   | 39295000  | 603  | -0.270584125 | 0.828983835 |
| L5  | 1  | 39355000  | 46585000  | 128  | 0.239093111  | 1.180250514 |
| L5  | 1  | 46595000  | 158505000 | 1438 | -0.024263807 | 0.98332225  |
| L5  | 1  | 158515000 | 167545000 | 162  | 0.211463046  | 1.157861784 |
| L5  | 1  | 167565000 | 180225000 | 225  | 0.083953354  | 1.059918513 |
| L5  | 1  | 180445000 | 212845000 | 521  | 0.289538243  | 1.222249016 |
| L5  | 1  | 212955000 | 248135000 | 634  | -0.203369473 | 0.868519729 |
| L5  | 2  | 5000      | 242915000 | 4096 | 0.008068575  | 1.005608379 |
| L5  | 3  | 135000    | 159675000 | 2775 | -0.24842293  | 0.841816137 |
| L5  | 3  | 159845000 | 197685000 | 646  | 0.010131545  | 1.007047369 |
| L5  | 4  | 205000    | 190725000 | 3183 | -0.284159821 | 0.821219722 |
| L5  | 5  | 145000    | 180545000 | 3057 | 0.001688089  | 1.001170779 |
| L5  | 6  | 215000    | 72045000  | 1079 | -0.012360679 | 0.991468829 |
| L5  | 6  | 72085000  | 170845000 | 1757 | -0.301625606 | 0.811337679 |
| L5  | 7  | 305000    | 159025000 | 2564 | 0.002624437  | 1.001820777 |
| L5  | 8  | 245000    | 48445000  | 767  | -0.105908709 | 0.929219472 |
| L5  | 8  | 48555000  | 146245000 | 1672 | -0.005293061 | 0.996337852 |
| L5  | 9  | 255000    | 2435000   | 39   | -0.170149443 | 0.888750614 |
| L5  | 9  | 2445000   | 88155000  | 977  | -0.094970949 | 0.936291101 |
| L5  | 9  | 88375000  | 96245000  | 140  | -0.149518571 | 0.901551261 |
| L5  | 9  | 96285000  | 140995000 | 773  | -0.07269122  | 0.950862593 |
| L5  | 10 | 165000    | 42735000  | 709  | 0.049211475  | 1.03469924  |
| L5  | 10 | 42955000  | 135335000 | 1520 | -0.293354709 | 0.816002395 |
| L5  | 11 | 255000    | 98815000  | 1584 | -0.006729963 | 0.995346009 |
| L5  | 11 | 98985000  | 134835000 | 634  | -0.30754187  | 0.808017324 |
| L5  | 12 | 205000    | 105835000 | 1735 | 0.019293868  | 1.013463315 |
| L5  | 12 | 105845000 | 133335000 | 499  | 0.333384103  | 1.259965388 |
| L5  | 13 | 19205000  | 114945000 | 1625 | -0.266545883 | 0.831307491 |
| L5  | 14 | 19115000  | 31675000  | 192  | -0.052834699 | 0.964040259 |
| L5  | 14 | 31805000  | 107245000 | 1313 | -0.256078119 | 0.837361145 |
| L5  | 15 | 22865000  | 102245000 | 1342 | 0.016505775  | 1.011506629 |
| L5  | 16 | 165000    | 90095000  | 1268 | 0.007768148  | 1.005398992 |
| L5  | 17 | 115000    | 22015000  | 353  | -0.28580256  | 0.820285163 |
| L5  | 17 | 22055000  | 80935000  | 852  | -0.002132368 | 0.998523047 |
| L5  | 18 | 55000     | 77785000  | 1312 | 0.011537426  | 1.008029197 |
| L5  | 19 | 255000    | 59095000  | 811  | -0.039384923 | 0.973069717 |
| L5  | 20 | 155000    | 62895000  | 1054 | 0.049627975  | 1.034997997 |
| L5  | 21 | 14615000  | 47935000  | 574  | 0.026281213  | 1.018383686 |
| L5  | 22 | 17205000  | 49205000  | 518  | -0.300709157 | 0.811853232 |
| L5  | 22 | 49215000  | 51195000  | 26   | 0.227388829  | 1.170714125 |
| L5  | X  | 2865000   | 10695000  | 148  | -0.307729487 | 0.807912251 |
| L5  | X  | 11015000  | 152675000 | 2379 | -0.000342014 | 0.999762962 |
| L26 | 1  | 1305000   | 249195000 | 3720 | 0.027921859  | 1.019542459 |

|     |    |           |           |      |              |             |
|-----|----|-----------|-----------|------|--------------|-------------|
| L26 | 2  | 65000     | 243045000 | 4098 | 0.01201192   | 1.008360787 |
| L26 | 3  | 235000    | 197595000 | 3420 | 0.000323003  | 1.000223914 |
| L26 | 4  | 115000    | 190795000 | 3186 | -0.030617464 | 0.979001202 |
| L26 | 5  | 75000     | 180645000 | 3061 | 0.000717971  | 1.000497783 |
| L26 | 6  | 405000    | 170895000 | 2837 | 0.010474938  | 1.007287096 |
| L26 | 7  | 365000    | 159095000 | 2564 | -0.00305435  | 0.997885125 |
| L26 | 8  | 205000    | 75445000  | 1245 | 0.027035259  | 1.018916098 |
| L26 | 8  | 75475000  | 129495000 | 933  | 0.572434892  | 1.487031174 |
| L26 | 8  | 129645000 | 138625000 | 167  | 0.145720107  | 1.106282706 |
| L26 | 8  | 138795000 | 146145000 | 90   | 0.044922543  | 1.03162779  |
| L26 | 9  | 265000    | 116405000 | 1520 | -0.000364459 | 0.999747408 |
| L26 | 9  | 116415000 | 123235000 | 130  | 0.187861432  | 1.139073966 |
| L26 | 9  | 123455000 | 140935000 | 279  | -0.010679028 | 0.99262519  |
| L26 | 10 | 155000    | 135445000 | 2234 | 0.001602301  | 1.001111248 |
| L26 | 11 | 605000    | 112085000 | 1813 | -0.006345677 | 0.995611171 |
| L26 | 11 | 112095000 | 134785000 | 406  | 0.166410454  | 1.122262725 |
| L26 | 12 | 205000    | 133775000 | 2237 | -0.008729258 | 0.993967608 |
| L26 | 13 | 19205000  | 115045000 | 1627 | 0.011196738  | 1.007791182 |
| L26 | 14 | 20455000  | 107085000 | 1504 | -0.015693432 | 0.989181092 |
| L26 | 15 | 20055000  | 102385000 | 1348 | 0.022691999  | 1.015853245 |
| L26 | 16 | 355000    | 90145000  | 1267 | 0.001849422  | 1.001282744 |
| L26 | 17 | 165000    | 80945000  | 1205 | -0.022009424 | 0.98486001  |
| L26 | 18 | 65000     | 77975000  | 1315 | 0.04949923   | 1.034905638 |
| L26 | 19 | 395000    | 59095000  | 808  | -0.122956506 | 0.918303846 |
| L26 | 20 | 315000    | 37005000  | 600  | 0.051245298  | 1.036158924 |
| L26 | 20 | 37225000  | 47245000  | 187  | 0.114178496  | 1.08235855  |
| L26 | 20 | 47465000  | 62895000  | 258  | 0.047190947  | 1.033251134 |
| L26 | 21 | 14675000  | 47945000  | 573  | 0.008794578  | 1.006114555 |
| L26 | 22 | 16915000  | 51145000  | 544  | -0.005564124 | 0.996150671 |
| L26 | X  | 2815000   | 152645000 | 2530 | -0.04360001  | 0.970230871 |
| M12 | 1  | 1305000   | 120345000 | 1989 | 0.058602481  | 1.041456427 |
| M12 | 1  | 121235000 | 188735000 | 714  | 0.429554732  | 1.346817835 |
| M12 | 1  | 188745000 | 249195000 | 1014 | 0.600774395  | 1.516530375 |
| M12 | 2  | 175000    | 243005000 | 4095 | -0.000231861 | 0.999839299 |
| M12 | 3  | 235000    | 197625000 | 3421 | -0.020422782 | 0.985943731 |
| M12 | 4  | 155000    | 190795000 | 3185 | -0.032307129 | 0.97785528  |
| M12 | 5  | 225000    | 180565000 | 3056 | 0.128924005  | 1.093477856 |
| M12 | 6  | 245000    | 170875000 | 2837 | 0.048048655  | 1.033865603 |
| M12 | 7  | 355000    | 159075000 | 2564 | 0.138230108  | 1.100554132 |
| M12 | 8  | 305000    | 146295000 | 2441 | 0.158426381  | 1.116069122 |
| M12 | 9  | 355000    | 140995000 | 1931 | -0.006001273 | 0.995848875 |
| M12 | 10 | 105000    | 135395000 | 2234 | -0.005345337 | 0.99630175  |
| M12 | 11 | 255000    | 134825000 | 2222 | 0.004433883  | 1.003078061 |
| M12 | 12 | 305000    | 133495000 | 2235 | -0.016132781 | 0.988879899 |
| M12 | 13 | 19215000  | 115055000 | 1627 | 0.133051472  | 1.096610712 |
| M12 | 14 | 20455000  | 107145000 | 1505 | 0.115192452  | 1.083119521 |
| M12 | 15 | 20075000  | 102395000 | 1348 | 0.147635083  | 1.107752116 |
| M12 | 16 | 155000    | 34995000  | 502  | 0.114344344  | 1.082482982 |

|     |    |           |           |      |              |             |
|-----|----|-----------|-----------|------|--------------|-------------|
| M12 | 16 | 46565000  | 90095000  | 763  | -0.190539264 | 0.876278117 |
| M12 | 17 | 15000     | 29815000  | 415  | -0.104859358 | 0.92989559  |
| M12 | 17 | 29825000  | 81075000  | 796  | 0.157561683  | 1.115400392 |
| M12 | 18 | 255000    | 77995000  | 1312 | 0.170122814  | 1.125154263 |
| M12 | 19 | 975000    | 59095000  | 808  | 0.106070851  | 1.076292981 |
| M12 | 20 | 185000    | 62895000  | 1053 | 0.197968258  | 1.147081786 |
| M12 | 21 | 14695000  | 48045000  | 574  | -0.008100084 | 0.994401182 |
| M12 | 22 | 17325000  | 50995000  | 541  | 0.002263233  | 1.001569985 |
| M12 | X  | 2705000   | 71915000  | 1140 | 0.123149662  | 1.089109992 |
| M12 | X  | 72345000  | 100105000 | 451  | 0.020616968  | 1.014393192 |
| M12 | X  | 100255000 | 152565000 | 932  | 0.107534758  | 1.077385652 |
| L22 | 1  | 1305000   | 33205000  | 498  | -0.133489479 | 0.911623817 |
| L22 | 1  | 33215000  | 69295000  | 631  | 0.043828046  | 1.030845446 |
| L22 | 1  | 69405000  | 147345000 | 889  | -0.102141125 | 0.93164929  |
| L22 | 1  | 147365000 | 168815000 | 335  | 0.15237309   | 1.111396106 |
| L22 | 1  | 168825000 | 248165000 | 1362 | 0.025308226  | 1.017697096 |
| L22 | 2  | 45000     | 86745000  | 1532 | 0.026264762  | 1.018372073 |
| L22 | 2  | 86845000  | 110445000 | 282  | -0.122730984 | 0.918447407 |
| L22 | 2  | 111405000 | 229545000 | 2047 | -0.005013439 | 0.99653098  |
| L22 | 2  | 229725000 | 242975000 | 229  | -0.0992481   | 0.933519394 |
| L22 | 3  | 205000    | 101435000 | 1746 | -0.119659732 | 0.920404708 |
| L22 | 3  | 101555000 | 114035000 | 220  | 0.005867458  | 1.004075294 |
| L22 | 3  | 114055000 | 148055000 | 595  | -0.075456682 | 0.949041656 |
| L22 | 3  | 148235000 | 174245000 | 454  | 0.368911195  | 1.291377857 |
| L22 | 3  | 174475000 | 197795000 | 400  | 0.018592392  | 1.012970663 |
| L22 | 4  | 105000    | 44925000  | 763  | -0.01211642  | 0.991636706 |
| L22 | 4  | 45055000  | 95405000  | 793  | -0.060596387 | 0.958867657 |
| L22 | 4  | 95415000  | 159785000 | 1108 | -0.041587979 | 0.971584932 |
| L22 | 4  | 159905000 | 190345000 | 515  | -0.111463111 | 0.925648837 |
| L22 | 5  | 75000     | 25385000  | 439  | -0.143838094 | 0.905108033 |
| L22 | 5  | 25395000  | 44865000  | 334  | -0.017893011 | 0.987674104 |
| L22 | 5  | 44875000  | 180555000 | 2286 | -0.122254921 | 0.918750528 |
| L22 | 6  | 235000    | 28055000  | 489  | -0.093217141 | 0.937429993 |
| L22 | 6  | 28065000  | 56715000  | 394  | 0.044232923  | 1.031134782 |
| L22 | 6  | 56855000  | 70115000  | 155  | -0.201460574 | 0.86966967  |
| L22 | 6  | 70295000  | 144335000 | 1311 | -0.011888868 | 0.991793126 |
| L22 | 6  | 144515000 | 154595000 | 185  | -0.117209886 | 0.921968978 |
| L22 | 6  | 154775000 | 170845000 | 289  | 0.00674801   | 1.00468832  |
| L22 | 7  | 105000    | 158935000 | 2563 | -0.007589017 | 0.994753505 |
| L22 | 8  | 165000    | 146245000 | 2443 | -0.010074831 | 0.993040986 |
| L22 | 9  | 205000    | 20895000  | 379  | 0.311035597  | 1.240597907 |
| L22 | 9  | 21085000  | 27845000  | 123  | -0.29467168  | 0.815257843 |
| L22 | 9  | 27955000  | 113235000 | 960  | -0.008259247 | 0.994291482 |
| L22 | 9  | 113245000 | 140905000 | 465  | -0.090287981 | 0.939335227 |
| L22 | 10 | 105000    | 42895000  | 712  | -0.002216232 | 0.998465004 |
| L22 | 10 | 42905000  | 135395000 | 1522 | -0.118653746 | 0.921046726 |
| L22 | 11 | 205000    | 95395000  | 1529 | -0.006899057 | 0.995229354 |
| L22 | 11 | 95655000  | 111125000 | 268  | -0.129219195 | 0.914326161 |



|     |    |           |           |      |              |             |
|-----|----|-----------|-----------|------|--------------|-------------|
| L22 | 11 | 111155000 | 134945000 | 425  | -0.048080106 | 0.967222623 |
| L22 | 12 | 315000    | 28385000  | 467  | 0.139092402  | 1.101212126 |
| L22 | 12 | 28395000  | 48515000  | 279  | -0.029716183 | 0.979612995 |
| L22 | 12 | 48555000  | 133845000 | 1490 | -0.104480999 | 0.930139495 |
| L22 | 13 | 19225000  | 48105000  | 502  | 0.015914325  | 1.011092035 |
| L22 | 13 | 48115000  | 94695000  | 763  | -0.059305766 | 0.959725834 |
| L22 | 13 | 94755000  | 115035000 | 361  | -0.00702118  | 0.995145112 |
| L22 | 14 | 20455000  | 34645000  | 248  | 0.10894107   | 1.07843638  |
| L22 | 14 | 34675000  | 106895000 | 1255 | -0.124857145 | 0.917094849 |
| L22 | 15 | 20075000  | 64475000  | 696  | -0.117136947 | 0.922015592 |
| L22 | 15 | 64485000  | 102345000 | 651  | 0.037203169  | 1.02612264  |
| L22 | 16 | 105000    | 28575000  | 452  | -0.019960338 | 0.986259818 |
| L22 | 16 | 29005000  | 90055000  | 813  | -0.082130301 | 0.944661717 |
| L22 | 17 | 85000     | 55165000  | 781  | -0.092926967 | 0.93761856  |
| L22 | 17 | 55345000  | 81065000  | 423  | 0.119769845  | 1.086561508 |
| L22 | 18 | 245000    | 46605000  | 761  | 0.014977663  | 1.010435802 |
| L22 | 18 | 46785000  | 77845000  | 545  | -0.113765456 | 0.924172806 |
| L22 | 19 | 305000    | 59095000  | 810  | -0.071374657 | 0.951730719 |
| L22 | 20 | 325000    | 62855000  | 1050 | -0.09416138  | 0.936816648 |
| L22 | 21 | 14685000  | 48045000  | 574  | -0.020682481 | 0.985766268 |
| L22 | 22 | 17325000  | 51195000  | 543  | -0.003934168 | 0.997276757 |
| L22 | X  | 2875000   | 152575000 | 2528 | -0.161336622 | 0.894196236 |
| M10 | 1  | 1305000   | 248875000 | 3719 | 0.029488704  | 1.02065034  |
| M10 | 2  | 105000    | 223925000 | 3764 | -0.046526664 | 0.968264654 |
| M10 | 2  | 224105000 | 242785000 | 326  | -0.17890201  | 0.88337505  |
| M10 | 3  | 105000    | 32215000  | 587  | 0.006716187  | 1.004666159 |
| M10 | 3  | 32225000  | 57645000  | 450  | -0.185637908 | 0.879260213 |
| M10 | 3  | 57665000  | 197655000 | 2387 | 0.004267659  | 1.002962495 |
| M10 | 4  | 185000    | 190795000 | 3184 | -0.003022826 | 0.99790693  |
| M10 | 5  | 225000    | 180635000 | 3058 | 8.12E-05     | 1.000056318 |
| M10 | 6  | 465000    | 170745000 | 2833 | 0.016863887  | 1.011757741 |
| M10 | 7  | 75000     | 159015000 | 2565 | 0.009882569  | 1.00687359  |
| M10 | 8  | 245000    | 15995000  | 254  | -0.412469941 | 0.75133596  |
| M10 | 8  | 16275000  | 35425000  | 353  | -0.138300997 | 0.908588533 |
| M10 | 8  | 35705000  | 146205000 | 1826 | 0.569634487  | 1.484147508 |
| M10 | 9  | 205000    | 140975000 | 1934 | -0.193048425 | 0.874755403 |
| M10 | 10 | 255000    | 2095000   | 36   | -0.33263378  | 0.79408548  |
| M10 | 10 | 2205000   | 16275000  | 268  | 0.079237019  | 1.056459176 |
| M10 | 10 | 16455000  | 31995000  | 271  | 0.195189426  | 1.144874473 |
| M10 | 10 | 32155000  | 65125000  | 453  | -0.189678491 | 0.876801097 |
| M10 | 10 | 65135000  | 83345000  | 291  | -0.031591756 | 0.978340278 |
| M10 | 10 | 83625000  | 127995000 | 790  | 0.286976881  | 1.220080958 |
| M10 | 10 | 128175000 | 135405000 | 109  | -0.149110292 | 0.901806434 |
| M10 | 11 | 485000    | 128345000 | 2105 | 0.014693542  | 1.010236829 |
| M10 | 11 | 128515000 | 130295000 | 31   | 0.214799844  | 1.160542892 |
| M10 | 11 | 130375000 | 134895000 | 82   | -0.165213854 | 0.891796317 |
| M10 | 12 | 205000    | 55995000  | 867  | -0.02713521  | 0.981367085 |
| M10 | 12 | 56325000  | 133495000 | 1366 | 0.18659132   | 1.138071596 |

|     |    |           |           |      |              |             |
|-----|----|-----------|-----------|------|--------------|-------------|
| M10 | 13 | 19275000  | 115095000 | 1627 | -0.05296418  | 0.963953741 |
| M10 | 14 | 19145000  | 107245000 | 1506 | -0.003187962 | 0.997792713 |
| M10 | 15 | 22875000  | 102295000 | 1343 | 0.017443578  | 1.012164358 |
| M10 | 16 | 125000    | 52935000  | 623  | 0.208859858  | 1.15577443  |
| M10 | 16 | 53115000  | 90105000  | 643  | -0.020902819 | 0.985615726 |
| M10 | 17 | 135000    | 81025000  | 1207 | -0.001696791 | 0.998824565 |
| M10 | 18 | 205000    | 77875000  | 1312 | 0.016282218  | 1.011349901 |
| M10 | 19 | 355000    | 28545000  | 343  | 0.03259944   | 1.022853438 |
| M10 | 19 | 28635000  | 38265000  | 167  | 0.452712901  | 1.36861143  |
| M10 | 19 | 38405000  | 49345000  | 167  | -0.079987286 | 0.946065984 |
| M10 | 19 | 49705000  | 57605000  | 102  | 0.384714143  | 1.305601068 |
| M10 | 19 | 57805000  | 59005000  | 18   | -0.095819143 | 0.935740796 |
| M10 | 20 | 155000    | 62855000  | 1053 | 0.048383415  | 1.034105527 |
| M10 | 21 | 14685000  | 48035000  | 574  | 0.015513639  | 1.010811259 |
| M10 | 22 | 17315000  | 51155000  | 542  | 0.035706866  | 1.02505894  |
| M10 | X  | 2705000   | 152695000 | 2533 | -0.022355809 | 0.984623577 |
| L15 | 1  | 1305000   | 248185000 | 3718 | 0.000932513  | 1.000646577 |
| L15 | 2  | 55000     | 8605000   | 152  | -0.102439938 | 0.931456346 |
| L15 | 2  | 8775000   | 242995000 | 3942 | -0.004808315 | 0.996672678 |
| L15 | 3  | 215000    | 49975000  | 904  | -0.012915536 | 0.991087586 |
| L15 | 3  | 49985000  | 88565000  | 676  | -0.178956902 | 0.88334144  |
| L15 | 3  | 88575000  | 197615000 | 1841 | -0.002165457 | 0.998500145 |
| L15 | 4  | 135000    | 190335000 | 3182 | 0.002983588  | 1.002070205 |
| L15 | 5  | 55000     | 16435000  | 303  | -0.08195195  | 0.944778507 |
| L15 | 5  | 16445000  | 180675000 | 2759 | -0.002004511 | 0.998611544 |
| L15 | 6  | 495000    | 8135000   | 139  | -0.20314918  | 0.868652358 |
| L15 | 6  | 8405000   | 37875000  | 423  | 0.304427439  | 1.234928435 |
| L15 | 6  | 38095000  | 96335000  | 925  | 0.003112734  | 1.002159912 |
| L15 | 6  | 96555000  | 118845000 | 391  | 0.366163065  | 1.288920306 |
| L15 | 6  | 119065000 | 123875000 | 89   | -0.137762639 | 0.908927646 |
| L15 | 6  | 123905000 | 161305000 | 682  | 0.008462977  | 1.005883328 |
| L15 | 6  | 161475000 | 170745000 | 166  | -0.07844304  | 0.947079186 |
| L15 | 7  | 65000     | 158975000 | 2565 | 0.141985396  | 1.10342257  |
| L15 | 8  | 195000    | 55615000  | 894  | -0.158861162 | 0.895731867 |
| L15 | 8  | 55785000  | 146295000 | 1545 | 0.109818352  | 1.079092361 |
| L15 | 9  | 365000    | 32055000  | 575  | -0.124028579 | 0.917621705 |
| L15 | 9  | 32065000  | 118525000 | 983  | 0.013350196  | 1.009296598 |
| L15 | 9  | 118535000 | 123845000 | 101  | -0.102986198 | 0.931103728 |
| L15 | 9  | 123855000 | 141015000 | 272  | 0.019545944  | 1.013640409 |
| L15 | 10 | 155000    | 135415000 | 2233 | -0.001771384 | 0.998772924 |
| L15 | 11 | 485000    | 47285000  | 801  | -0.13139763  | 0.912946592 |
| L15 | 11 | 47295000  | 130035000 | 1333 | -0.012717852 | 0.991223398 |
| L15 | 11 | 130045000 | 134885000 | 87   | -0.148216499 | 0.902365303 |
| L15 | 12 | 355000    | 25455000  | 413  | -0.165068155 | 0.891886384 |
| L15 | 12 | 25465000  | 133825000 | 1823 | 0.014168785  | 1.009869438 |
| L15 | 13 | 19345000  | 115075000 | 1625 | -0.159060754 | 0.895607954 |
| L15 | 14 | 20545000  | 107235000 | 1504 | -0.002361534 | 0.998364448 |
| L15 | 15 | 22855000  | 89085000  | 1104 | -0.126381972 | 0.916126056 |

|     |    |           |           |      |              |             |
|-----|----|-----------|-----------|------|--------------|-------------|
| L15 | 15 | 89095000  | 102385000 | 241  | 0.304309298  | 1.234827312 |
| L15 | 16 | 355000    | 90035000  | 1265 | 0.012292026  | 1.008556583 |
| L15 | 17 | 55000     | 17695000  | 302  | -0.112682689 | 0.924866674 |
| L15 | 17 | 17825000  | 81095000  | 906  | 0.041531515  | 1.029205816 |
| L15 | 18 | 225000    | 77875000  | 1312 | -0.023549846 | 0.983808997 |
| L15 | 19 | 345000    | 59075000  | 809  | 0.107380686  | 1.0772706   |
| L15 | 20 | 205000    | 56315000  | 961  | -0.027556797 | 0.98108035  |
| L15 | 20 | 56585000  | 62775000  | 86   | -0.091653387 | 0.938446635 |
| L15 | 21 | 14445000  | 48035000  | 576  | 0.003000705  | 1.002082095 |
| L15 | 22 | 16905000  | 51125000  | 544  | 0.00917995   | 1.006383344 |
| L15 | X  | 2795000   | 152665000 | 2530 | -0.099376958 | 0.933436018 |
| L17 | 1  | 1305000   | 240715000 | 3579 | 0.007992245  | 1.005555175 |
| L17 | 1  | 240895000 | 248865000 | 135  | 0.054387957  | 1.038418475 |
| L17 | 2  | 95000     | 242925000 | 4095 | -0.004714017 | 0.996737825 |
| L17 | 3  | 155000    | 197775000 | 3425 | -0.005063271 | 0.996496559 |
| L17 | 4  | 255000    | 190345000 | 3180 | 0.018453152  | 1.012872902 |
| L17 | 5  | 55000     | 180575000 | 3060 | -0.010238992 | 0.992927996 |
| L17 | 6  | 405000    | 170745000 | 2834 | 0.001165988  | 1.000808528 |
| L17 | 7  | 75000     | 158995000 | 2565 | -0.024229378 | 0.983345717 |
| L17 | 8  | 155000    | 146135000 | 2442 | -0.000306995 | 0.99978723  |
| L17 | 9  | 265000    | 140885000 | 1931 | 0.004530034  | 1.003144915 |
| L17 | 10 | 115000    | 135395000 | 2234 | -0.005035591 | 0.996515679 |
| L17 | 11 | 295000    | 134875000 | 2222 | -0.006606475 | 0.995431209 |
| L17 | 12 | 355000    | 133385000 | 2233 | 0.018473265  | 1.012887023 |
| L17 | 13 | 19215000  | 115055000 | 1627 | 0.00317933   | 1.002206174 |
| L17 | 14 | 20535000  | 107245000 | 1504 | 0.006933946  | 1.004817814 |
| L17 | 15 | 22845000  | 102395000 | 1345 | 0.003271404  | 1.002270138 |
| L17 | 16 | 375000    | 48745000  | 541  | 0.051613035  | 1.03642307  |
| L17 | 16 | 48875000  | 90055000  | 722  | 0.006633636  | 1.004608674 |
| L17 | 17 | 85000     | 10495000  | 173  | 0.09638991   | 1.069094891 |
| L17 | 17 | 10555000  | 57435000  | 642  | 0.04539144   | 1.031963139 |
| L17 | 17 | 57445000  | 80995000  | 391  | 0.069036571  | 1.049015919 |
| L17 | 18 | 175000    | 77845000  | 1312 | -0.02009567  | 0.986167306 |
| L17 | 19 | 325000    | 58995000  | 808  | 0.126212243  | 1.091424431 |
| L17 | 20 | 225000    | 62645000  | 1050 | -0.038705188 | 0.973528293 |
| L17 | 21 | 14425000  | 48035000  | 577  | -0.009611841 | 0.993359725 |
| L17 | 22 | 17315000  | 51165000  | 542  | 0.015694605  | 1.010938059 |
| L17 | X  | 2845000   | 152685000 | 2530 | 0.009278265  | 1.006451928 |
| M27 | 1  | 1305000   | 248895000 | 3719 | 0.005201907  | 1.003612196 |
| M27 | 2  | 125000    | 242945000 | 4095 | -0.01603379  | 0.988947753 |
| M27 | 3  | 175000    | 197765000 | 3424 | -0.015600355 | 0.989244912 |
| M27 | 4  | 245000    | 190345000 | 3180 | -0.006625451 | 0.995418116 |
| M27 | 5  | 55000     | 180635000 | 3061 | -0.018982425 | 0.986928569 |
| M27 | 6  | 465000    | 170875000 | 2836 | -0.012450887 | 0.991406837 |
| M27 | 7  | 105000    | 158995000 | 2564 | 0.001324034  | 1.000918172 |
| M27 | 8  | 175000    | 40125000  | 695  | -0.19505227  | 0.873541246 |
| M27 | 8  | 40355000  | 145945000 | 1740 | 0.518871027  | 1.432833553 |
| M27 | 9  | 225000    | 140885000 | 1932 | 0.090521085  | 1.06475469  |

|     |    |           |           |      |              |             |
|-----|----|-----------|-----------|------|--------------|-------------|
| M27 | 10 | 115000    | 135365000 | 2233 | -0.007104075 | 0.995087934 |
| M27 | 11 | 295000    | 134945000 | 2223 | -0.020907936 | 0.985612231 |
| M27 | 12 | 345000    | 133775000 | 2235 | 0.009088308  | 1.006319419 |
| M27 | 13 | 19305000  | 115095000 | 1626 | -0.015455584 | 0.989344185 |
| M27 | 14 | 20575000  | 107235000 | 1504 | 0.002613185  | 1.001812963 |
| M27 | 15 | 22865000  | 102345000 | 1344 | 0.005485899  | 1.003809774 |
| M27 | 16 | 505000    | 6125000   | 76   | 0.532196346  | 1.446129094 |
| M27 | 16 | 6205000   | 53045000  | 543  | 0.236207348  | 1.177892067 |
| M27 | 16 | 53055000  | 90075000  | 644  | -0.169795265 | 0.888968827 |
| M27 | 17 | 105000    | 81045000  | 1208 | 0.051088793  | 1.036046526 |
| M27 | 18 | 95000     | 77815000  | 1311 | -0.017077824 | 0.988232342 |
| M27 | 19 | 295000    | 35965000  | 476  | 0.077170369  | 1.054946889 |
| M27 | 19 | 35975000  | 58945000  | 331  | 0.102200603  | 1.073409531 |
| M27 | 20 | 175000    | 62845000  | 1053 | -0.010111371 | 0.993015835 |
| M27 | 21 | 14405000  | 47975000  | 576  | -0.010231058 | 0.992933457 |
| M27 | 22 | 17205000  | 51155000  | 543  | 0.02294687   | 1.016032725 |
| M27 | X  | 2835000   | 152645000 | 2529 | 0.00392971   | 1.00272758  |
| M25 | 1  | 1305000   | 29445000  | 440  | -0.01167149  | 0.991942576 |
| M25 | 1  | 29605000  | 88285000  | 1027 | -0.133426678 | 0.9116635   |
| M25 | 1  | 88355000  | 248135000 | 2248 | 0.007680578  | 1.005337968 |
| M25 | 2  | 5000      | 242935000 | 4097 | -0.018571774 | 0.98720953  |
| M25 | 3  | 155000    | 87215000  | 1556 | -0.169781204 | 0.888977491 |
| M25 | 3  | 87255000  | 197755000 | 1867 | 0.033573826  | 1.023544499 |
| M25 | 4  | 225000    | 53805000  | 851  | -0.261159395 | 0.834417086 |
| M25 | 4  | 53975000  | 190755000 | 2329 | -0.012369735 | 0.991462605 |
| M25 | 5  | 175000    | 49715000  | 791  | -0.009172267 | 0.993662436 |
| M25 | 5  | 49885000  | 68765000  | 337  | -0.29552723  | 0.81477452  |
| M25 | 5  | 68765001  | 71304999  | 12   | 0.710627461  | 1.63651572  |
| M25 | 5  | 71305000  | 76345000  | 97   | 0.22343795   | 1.167512463 |
| M25 | 5  | 76515000  | 97205000  | 355  | 0.017654188  | 1.012312129 |
| M25 | 5  | 97375000  | 121015000 | 386  | 0.218613424  | 1.163614698 |
| M25 | 5  | 121055000 | 141515000 | 366  | 0.00049023   | 1.000339859 |
| M25 | 5  | 141735000 | 152785000 | 209  | -0.328933448 | 0.796124823 |
| M25 | 5  | 152955000 | 171815000 | 350  | -0.010539663 | 0.992721083 |
| M25 | 5  | 171825000 | 180565000 | 136  | -0.123248718 | 0.918117867 |
| M25 | 6  | 235000    | 170735000 | 2834 | -0.002976455 | 0.997939005 |
| M25 | 7  | 55000     | 159035000 | 2566 | -0.008182214 | 0.994344574 |
| M25 | 8  | 255000    | 34685000  | 596  | -0.217547566 | 0.860026151 |
| M25 | 8  | 34695000  | 146235000 | 1845 | 0.161109135  | 1.118146432 |
| M25 | 9  | 305000    | 140995000 | 1932 | -0.005871054 | 0.995938764 |
| M25 | 10 | 265000    | 135285000 | 2230 | 0.008125994  | 1.005648402 |
| M25 | 11 | 205000    | 30395000  | 491  | -0.219573527 | 0.858819273 |
| M25 | 11 | 30455000  | 42485000  | 224  | 0.057012541  | 1.04030931  |
| M25 | 11 | 42555000  | 49555000  | 115  | -0.252914529 | 0.839199353 |
| M25 | 11 | 49655000  | 129355000 | 1290 | -0.005074262 | 0.996488968 |
| M25 | 11 | 129365000 | 134875000 | 100  | -0.071462343 | 0.951672875 |
| M25 | 12 | 205000    | 84085000  | 1335 | -0.002797364 | 0.998062894 |
| M25 | 12 | 84095000  | 133395000 | 900  | -0.240920735 | 0.846205088 |

|     |    |           |           |      |              |             |
|-----|----|-----------|-----------|------|--------------|-------------|
| M25 | 13 | 19215000  | 26085000  | 117  | 0.11801453   | 1.085240302 |
| M25 | 13 | 26095000  | 115025000 | 1510 | -0.219973562 | 0.85858117  |
| M25 | 14 | 20495000  | 42985000  | 381  | -0.26130398  | 0.834333466 |
| M25 | 14 | 43155000  | 52045000  | 145  | 0.003300395  | 1.002290278 |
| M25 | 14 | 52265000  | 70525000  | 334  | -0.287918344 | 0.819083056 |
| M25 | 14 | 70745000  | 107095000 | 634  | 0.013702499  | 1.009543096 |
| M25 | 15 | 20165000  | 31435000  | 126  | -0.120333477 | 0.919974975 |
| M25 | 15 | 31445000  | 102395000 | 1221 | -0.136167474 | 0.909933189 |
| M25 | 16 | 105000    | 48975000  | 549  | -0.000400578 | 0.999722379 |
| M25 | 16 | 48985000  | 90115000  | 720  | -0.250231771 | 0.840761335 |
| M25 | 17 | 135000    | 4075000   | 64   | -0.076477394 | 0.948370443 |
| M25 | 17 | 4245000   | 22125000  | 288  | -0.396224315 | 0.759844276 |
| M25 | 17 | 25405000  | 38895000  | 184  | 0.371171826  | 1.293402968 |
| M25 | 17 | 39035000  | 43245000  | 56   | -0.291889861 | 0.816831348 |
| M25 | 17 | 43265000  | 69075000  | 415  | 0.03059887   | 1.021436041 |
| M25 | 17 | 69245000  | 74625000  | 94   | 0.335455118  | 1.26177539  |
| M25 | 17 | 74845000  | 78695000  | 62   | 0.144450059  | 1.10530924  |
| M25 | 17 | 79305000  | 80935000  | 22   | -0.335237251 | 0.792653774 |
| M25 | 18 | 55000     | 7965000   | 144  | 0.113327547  | 1.081720328 |
| M25 | 18 | 8135000   | 28895000  | 301  | -0.19444342  | 0.873909978 |
| M25 | 18 | 29085000  | 35445000  | 109  | 0.43543118   | 1.352314941 |
| M25 | 18 | 35445001  | 35954999  | 9    | 0.54387735   | 1.457885432 |
| M25 | 18 | 35955000  | 59995000  | 440  | -0.271914389 | 0.828219807 |
| M25 | 18 | 60175000  | 73885000  | 229  | 0.079276818  | 1.056488321 |
| M25 | 18 | 74055000  | 77865000  | 69   | 0.181073849  | 1.133727445 |
| M25 | 19 | 335000    | 29845000  | 367  | 0.040520878  | 1.028485089 |
| M25 | 19 | 29855000  | 31185000  | 24   | 0.280606745  | 1.214705638 |
| M25 | 19 | 31355000  | 48535000  | 276  | -0.222290587 | 0.857203362 |
| M25 | 19 | 48705000  | 59055000  | 135  | 0.208783453  | 1.155713222 |
| M25 | 20 | 275000    | 24095000  | 444  | 0.244064671  | 1.1843247   |
| M25 | 20 | 24255000  | 62885000  | 605  | 0.059793422  | 1.042316502 |
| M25 | 21 | 14605000  | 48085000  | 577  | -0.063903135 | 0.956672389 |
| M25 | 22 | 17205000  | 38625000  | 347  | -0.246157481 | 0.84313907  |
| M25 | 22 | 38635000  | 43355000  | 76   | 0.018558586  | 1.012946926 |
| M25 | 22 | 43365000  | 50955000  | 118  | -0.203223217 | 0.868607782 |
| M25 | X  | 2725000   | 152645000 | 2532 | -0.013301788 | 0.990822278 |
| M13 | 1  | 1305000   | 121275000 | 1993 | -0.41471784  | 0.750166196 |
| M13 | 1  | 145405000 | 248875000 | 1723 | 0.796179579  | 1.736496592 |
| M13 | 2  | 105000    | 24445000  | 435  | 0.046617271  | 1.032840352 |
| M13 | 2  | 24625000  | 28255000  | 64   | 0.222561893  | 1.166803721 |
| M13 | 2  | 28305000  | 36945000  | 158  | 0.118459885  | 1.085575363 |
| M13 | 2  | 37075000  | 104595000 | 1052 | 0.119351579  | 1.086246538 |
| M13 | 2  | 104605000 | 243045000 | 2382 | 0.041372492  | 1.029092377 |
| M13 | 3  | 105000    | 51645000  | 928  | 0.171842103  | 1.126495931 |
| M13 | 3  | 51805000  | 68795000  | 321  | 0.067467102  | 1.047875343 |
| M13 | 3  | 68955000  | 98845000  | 443  | 0.168733336  | 1.124071134 |
| M13 | 3  | 98995000  | 103965000 | 92   | 0.411853799  | 1.330394214 |
| M13 | 3  | 104245000 | 123465000 | 343  | 0.137393499  | 1.099916114 |

|     |    |           |           |      |              |             |
|-----|----|-----------|-----------|------|--------------|-------------|
| M13 | 3  | 123555000 | 138375000 | 262  | 0.059634561  | 1.042201734 |
| M13 | 3  | 138655000 | 141995000 | 62   | 0.202305115  | 1.150535194 |
| M13 | 3  | 142155000 | 197625000 | 956  | 0.077223498  | 1.05498574  |
| M13 | 4  | 155000    | 39095000  | 656  | 0.178364954  | 1.131600684 |
| M13 | 4  | 39205000  | 190455000 | 2524 | 0.411531754  | 1.330097271 |
| M13 | 5  | 55000     | 45075000  | 776  | -0.050796648 | 0.965403091 |
| M13 | 5  | 45085000  | 45795000  | 12   | 0.285301937  | 1.218665288 |
| M13 | 5  | 45855000  | 180645000 | 2272 | -0.034658588 | 0.976262765 |
| M13 | 6  | 475000    | 13535000  | 237  | 0.313311491  | 1.242556532 |
| M13 | 6  | 13765000  | 22325000  | 161  | 0.495671713  | 1.409977082 |
| M13 | 6  | 22335000  | 170845000 | 2434 | 0.440672492  | 1.357236837 |
| M13 | 7  | 85000     | 6745000   | 93   | 0.205119919  | 1.152782164 |
| M13 | 7  | 6905000   | 53795000  | 833  | 0.079387157  | 1.056569125 |
| M13 | 7  | 53805000  | 114975000 | 907  | 0.140827495  | 1.102537323 |
| M13 | 7  | 115255000 | 126465000 | 192  | 0.064256459  | 1.045545944 |
| M13 | 7  | 126645000 | 152355000 | 418  | 0.125286346  | 1.090724198 |
| M13 | 7  | 152365000 | 159055000 | 114  | 0.049974467  | 1.035246602 |
| M13 | 8  | 285000    | 32055000  | 545  | -0.47031819  | 0.721805384 |
| M13 | 8  | 32055001  | 41484999  | 172  | 3.061945094  | 8.350977594 |
| M13 | 8  | 41485000  | 67795000  | 395  | 0.388014569  | 1.308591286 |
| M13 | 8  | 67975000  | 146105000 | 1323 | 1.673762647  | 3.19045602  |
| M13 | 9  | 235000    | 140935000 | 1932 | 0.003483821  | 1.002417719 |
| M13 | 10 | 165000    | 65115000  | 1036 | -0.021936915 | 0.984909509 |
| M13 | 10 | 65305000  | 89355000  | 390  | 0.303938821  | 1.234510255 |
| M13 | 10 | 89635000  | 125785000 | 650  | -0.014910106 | 0.989718324 |
| M13 | 10 | 126065000 | 135425000 | 148  | 0.250201306  | 1.189373062 |
| M13 | 11 | 605000    | 8045000   | 109  | 0.308988426  | 1.238838759 |
| M13 | 11 | 8145000   | 55765000  | 743  | 0.314405586  | 1.243499206 |
| M13 | 11 | 55775000  | 67355000  | 196  | 0.883164723  | 1.844416815 |
| M13 | 11 | 67785000  | 127225000 | 1030 | -0.356206554 | 0.781216024 |
| M13 | 11 | 127355000 | 134925000 | 136  | 0.707115764  | 1.632537084 |
| M13 | 12 | 455000    | 125745000 | 2096 | 0.32421124   | 1.25197976  |
| M13 | 12 | 125835000 | 133805000 | 136  | 0.245513512  | 1.185514667 |
| M13 | 13 | 19335000  | 23775000  | 72   | -0.422579807 | 0.746089285 |
| M13 | 13 | 23955000  | 50195000  | 461  | -0.07108748  | 0.951920186 |
| M13 | 13 | 50255000  | 53565000  | 57   | 0.314301978  | 1.243409906 |
| M13 | 13 | 53745000  | 57505000  | 59   | 0.236169269  | 1.177860978 |
| M13 | 13 | 57515000  | 115045000 | 968  | -0.044302307 | 0.969758683 |
| M13 | 14 | 20525000  | 45045000  | 415  | 0.330749397  | 1.257666491 |
| M13 | 14 | 45225000  | 107145000 | 1086 | -0.431317749 | 0.741584117 |
| M13 | 15 | 20165000  | 40505000  | 276  | 0.158904768  | 1.116439264 |
| M13 | 15 | 40515000  | 46545000  | 99   | 0.32540662   | 1.253017549 |
| M13 | 15 | 46555000  | 102335000 | 971  | 0.196909694  | 1.146240434 |
| M13 | 16 | 255000    | 13665000  | 218  | 0.463329769  | 1.378720263 |
| M13 | 16 | 13845000  | 14715000  | 17   | -0.285423546 | 0.820500691 |
| M13 | 16 | 15595000  | 24995000  | 142  | 0.443264246  | 1.35967726  |
| M13 | 16 | 25225000  | 56335000  | 296  | 1.63700537   | 3.110195721 |
| M13 | 16 | 56565000  | 90045000  | 579  | -0.423327189 | 0.745702876 |

|     |    |           |           |      |              |             |
|-----|----|-----------|-----------|------|--------------|-------------|
| M13 | 17 | 45000     | 21065000  | 348  | -0.182250763 | 0.881326956 |
| M13 | 17 | 21845000  | 33095000  | 122  | 0.44521297   | 1.361515088 |
| M13 | 17 | 33375000  | 49395000  | 201  | 0.533177619  | 1.447113038 |
| M13 | 17 | 49605000  | 81095000  | 529  | 0.481189727  | 1.395894324 |
| M13 | 18 | 55000     | 77805000  | 1312 | -0.067234642 | 0.954465766 |
| M13 | 19 | 285000    | 36665000  | 484  | 0.051955849  | 1.036669375 |
| M13 | 19 | 36895000  | 48745000  | 187  | 0.342495337  | 1.267947786 |
| M13 | 19 | 49165000  | 56555000  | 90   | 0.640714656  | 1.559101288 |
| M13 | 19 | 56785000  | 59045000  | 37   | 0.323420702  | 1.251293914 |
| M13 | 20 | 205000    | 62645000  | 1050 | 0.606696024  | 1.522767858 |
| M13 | 21 | 14425000  | 27715000  | 208  | 0.109509879  | 1.078861657 |
| M13 | 21 | 27855000  | 30095000  | 40   | -0.335552556 | 0.792480556 |
| M13 | 21 | 30105000  | 33795000  | 65   | 0.065498959  | 1.046446793 |
| M13 | 21 | 33955000  | 36045000  | 39   | 0.239907043  | 1.180916569 |
| M13 | 21 | 36255000  | 38935000  | 50   | -0.082980035 | 0.944105484 |
| M13 | 21 | 39105000  | 48015000  | 162  | -0.272726851 | 0.827753522 |
| M13 | 22 | 17245000  | 50955000  | 540  | 0.185169266  | 1.136950359 |
| M13 | X  | 2735000   | 152675000 | 2532 | 0.322216138  | 1.250249596 |
| L25 | 1  | 1305000   | 119935000 | 1986 | -0.02733304  | 0.981232525 |
| L25 | 1  | 120365000 | 249195000 | 1731 | 0.399291344  | 1.318859924 |
| L25 | 2  | 15000     | 243035000 | 4099 | -0.025875956 | 0.982224044 |
| L25 | 3  | 265000    | 197655000 | 3421 | 0.024196671  | 1.016913291 |
| L25 | 4  | 185000    | 190705000 | 3182 | -0.037726163 | 0.974189161 |
| L25 | 5  | 135000    | 180605000 | 3058 | 0.022181219  | 1.01549365  |
| L25 | 6  | 435000    | 170725000 | 2833 | -0.04026135  | 0.972478763 |
| L25 | 7  | 55000     | 159015000 | 2565 | 0.050654841  | 1.035734938 |
| L25 | 8  | 205000    | 146095000 | 2440 | 0.001765352  | 1.001224397 |
| L25 | 9  | 205000    | 140935000 | 1933 | -0.037620985 | 0.974260186 |
| L25 | 10 | 165000    | 135335000 | 2232 | -0.019364717 | 0.986667082 |
| L25 | 11 | 265000    | 134945000 | 2224 | -0.050269505 | 0.965755903 |
| L25 | 12 | 475000    | 133475000 | 2233 | 0.031858036  | 1.022327927 |
| L25 | 13 | 19255000  | 114945000 | 1624 | 0.004338136  | 1.003011492 |
| L25 | 14 | 20475000  | 107145000 | 1505 | 0.076815831  | 1.054687671 |
| L25 | 15 | 22825000  | 102305000 | 1344 | -0.026798307 | 0.981596284 |
| L25 | 16 | 185000    | 48055000  | 531  | 0.052169617  | 1.036822992 |
| L25 | 16 | 48385000  | 90095000  | 732  | -0.430099015 | 0.742210844 |
| L25 | 17 | 95000     | 80955000  | 1206 | 0.019965792  | 1.013935438 |
| L25 | 18 | 85000     | 77845000  | 1312 | 0.010269068  | 1.007143368 |
| L25 | 19 | 275000    | 58945000  | 808  | 0.049101188  | 1.034620145 |
| L25 | 20 | 155000    | 62895000  | 1054 | 0.032677428  | 1.022908732 |
| L25 | 21 | 14775000  | 47975000  | 573  | -0.016738333 | 0.988464917 |
| L25 | 22 | 17205000  | 50835000  | 541  | -0.016620742 | 0.988545488 |
| L25 | X  | 2715000   | 152645000 | 2532 | 0.016236106  | 1.011317576 |
| M19 | 1  | 1305000   | 121285000 | 1993 | 0.022270168  | 1.015556262 |
| M19 | 1  | 145415000 | 248195000 | 1722 | 0.250252401  | 1.189415187 |
| M19 | 2  | 75000     | 242945000 | 4096 | 0.141808766  | 1.103287486 |
| M19 | 3  | 175000    | 38225000  | 696  | 0.135227323  | 1.098265852 |
| M19 | 3  | 38235000  | 197645000 | 2727 | -0.009499415 | 0.993437137 |

|     |    |           |           |      |              |             |
|-----|----|-----------|-----------|------|--------------|-------------|
| M19 | 4  | 175000    | 190745000 | 3184 | -0.016280217 | 0.988778846 |
| M19 | 5  | 175000    | 180625000 | 3059 | -0.003986529 | 0.997240563 |
| M19 | 6  | 205000    | 170855000 | 2837 | -0.06960664  | 0.952897776 |
| M19 | 7  | 55000     | 159095000 | 2567 | 0.144607688  | 1.105430013 |
| M19 | 8  | 325000    | 146295000 | 2441 | 0.009773643  | 1.006797572 |
| M19 | 9  | 235000    | 140915000 | 1931 | 0.003813122  | 1.002646551 |
| M19 | 10 | 145000    | 135415000 | 2233 | 0.00619064   | 1.004300244 |
| M19 | 11 | 455000    | 134845000 | 2221 | -0.036239377 | 0.97519364  |
| M19 | 12 | 325000    | 55395000  | 856  | 0.013181185  | 1.009178367 |
| M19 | 12 | 55555000  | 58745000  | 52   | 0.163353018  | 1.119886884 |
| M19 | 12 | 58865000  | 133465000 | 1323 | 0.016147599  | 1.011255535 |
| M19 | 13 | 19245000  | 114975000 | 1625 | -0.053803151 | 0.963393336 |
| M19 | 14 | 20455000  | 107105000 | 1504 | 0.019167002  | 1.013374198 |
| M19 | 15 | 20185000  | 102375000 | 1346 | 0.030307941  | 1.021230083 |
| M19 | 16 | 505000    | 90075000  | 1264 | 0.025178133  | 1.017605331 |
| M19 | 17 | 105000    | 53715000  | 755  | 0.154772184  | 1.113245811 |
| M19 | 17 | 53725000  | 80955000  | 451  | 0.388577934  | 1.309102384 |
| M19 | 18 | 85000     | 77775000  | 1311 | -0.012843773 | 0.991136886 |
| M19 | 19 | 255000    | 59085000  | 811  | 0.069039901  | 1.04901834  |
| M19 | 20 | 315000    | 62795000  | 1049 | 0.154080146  | 1.112711933 |
| M19 | 21 | 14615000  | 47945000  | 574  | 0.004782929  | 1.003320775 |
| M19 | 22 | 16925000  | 51145000  | 544  | 0.052553935  | 1.037099227 |
| M19 | X  | 2725000   | 19705000  | 314  | 0.014473158  | 1.010082518 |
| M19 | X  | 19885000  | 104585000 | 1356 | 0.087672829  | 1.062654661 |
| M19 | X  | 104595000 | 152645000 | 858  | 0.025642105  | 1.017932646 |
| L16 | 1  | 1305000   | 192665000 | 2747 | 0.002035343  | 1.001411788 |
| L16 | 1  | 192835000 | 248895000 | 968  | 0.223980079  | 1.167951267 |
| L16 | 2  | 35000     | 242975000 | 4097 | 0.00800175   | 1.0055618   |
| L16 | 3  | 195000    | 197695000 | 3423 | 0.006876236  | 1.00477762  |
| L16 | 4  | 155000    | 190745000 | 3184 | 0.007374045  | 1.005124383 |
| L16 | 5  | 55000     | 180645000 | 3061 | 0.000565709  | 1.000392196 |
| L16 | 6  | 485000    | 170745000 | 2832 | 0.007655329  | 1.005320373 |
| L16 | 7  | 65000     | 159095000 | 2567 | 0.023235965  | 1.016236344 |
| L16 | 8  | 315000    | 146235000 | 2440 | 0.142053912  | 1.103474975 |
| L16 | 9  | 305000    | 141005000 | 1932 | -0.004667298 | 0.996770103 |
| L16 | 10 | 155000    | 135295000 | 2231 | -0.001346467 | 0.999067135 |
| L16 | 11 | 215000    | 134885000 | 2224 | -0.024970986 | 0.982840365 |
| L16 | 12 | 355000    | 133845000 | 2236 | -0.003239189 | 0.997757284 |
| L16 | 13 | 19335000  | 115045000 | 1624 | -0.040443542 | 0.972355961 |
| L16 | 14 | 20515000  | 107145000 | 1504 | -0.001807898 | 0.998747645 |
| L16 | 15 | 20075000  | 102345000 | 1347 | 0.010221727  | 1.00711032  |
| L16 | 16 | 265000    | 90105000  | 1267 | -0.057009607 | 0.961254527 |
| L16 | 17 | 55000     | 80945000  | 1207 | -0.015088541 | 0.989595921 |
| L16 | 18 | 55000     | 77895000  | 1314 | -0.015560778 | 0.98927205  |
| L16 | 19 | 325000    | 59065000  | 809  | 0.004730554  | 1.003284352 |
| L16 | 20 | 285000    | 62795000  | 1049 | 0.003857293  | 1.002677249 |
| L16 | 21 | 14615000  | 47935000  | 574  | 0.013333983  | 1.009285255 |
| L16 | 22 | 16905000  | 51105000  | 543  | -0.005764508 | 0.99601232  |



|     |   |           |           |      |              |             |
|-----|---|-----------|-----------|------|--------------|-------------|
| L16 | X | 2775000   | 152655000 | 2531 | 0.021798471  | 1.015224275 |
| M14 | 1 | 1305000   | 11385000  | 142  | 0.066106371  | 1.046887467 |
| M14 | 1 | 11615000  | 18815000  | 104  | -0.711019398 | 0.610888337 |
| M14 | 1 | 19045000  | 101275000 | 1444 | 0.014110138  | 1.009828387 |
| M14 | 1 | 101305000 | 106495000 | 65   | -0.746082969 | 0.596220147 |
| M14 | 1 | 106555000 | 145505000 | 235  | 0.000193959  | 1.000134451 |
| M14 | 1 | 145555000 | 187415000 | 684  | 0.771368369  | 1.706887967 |
| M14 | 1 | 187595000 | 209175000 | 327  | 0.612545396  | 1.528954417 |
| M14 | 1 | 209355000 | 211735000 | 44   | 0.183517514  | 1.135649402 |
| M14 | 1 | 211915000 | 215885000 | 77   | -0.294123972 | 0.815567408 |
| M14 | 1 | 215905000 | 217575000 | 33   | -0.196723792 | 0.872529738 |
| M14 | 1 | 217805000 | 249195000 | 543  | 0.698381063  | 1.622682858 |
| M14 | 2 | 575000    | 1695000   | 21   | -2.300203166 | 0.203034505 |
| M14 | 2 | 1695001   | 2214999   | 10   | -2.434119546 | 0.185036329 |
| M14 | 2 | 2215000   | 19885000  | 318  | -0.023491048 | 0.983849094 |
| M14 | 2 | 20065000  | 35225000  | 271  | 0.504776941  | 1.418903958 |
| M14 | 2 | 35405000  | 45045000  | 171  | 0.200313195  | 1.148947753 |
| M14 | 2 | 45115000  | 46495000  | 25   | 0.483656032  | 1.398282664 |
| M14 | 2 | 46675000  | 55465000  | 159  | -0.030185318 | 0.979294497 |
| M14 | 2 | 55795000  | 64945000  | 164  | 0.794255613  | 1.734182358 |
| M14 | 2 | 65125000  | 124845000 | 879  | -0.071787704 | 0.951458276 |
| M14 | 2 | 124955000 | 142925000 | 304  | -0.737936186 | 0.599596478 |
| M14 | 2 | 143155000 | 242885000 | 1742 | 0.008066705  | 1.005607075 |
| M14 | 3 | 115000    | 9285000   | 177  | 0.551850036  | 1.465964366 |
| M14 | 3 | 9515000   | 42365000  | 589  | 0.074217304  | 1.052789718 |
| M14 | 3 | 42545000  | 86305000  | 770  | -0.726342811 | 0.604434196 |
| M14 | 3 | 86585000  | 87995000  | 26   | 0.496397227  | 1.410686321 |
| M14 | 3 | 88155000  | 90165000  | 32   | -0.759860171 | 0.590553565 |
| M14 | 3 | 93595000  | 155185000 | 1081 | 0.47021333   | 1.385314298 |
| M14 | 3 | 155355000 | 197635000 | 728  | 0.025621207  | 1.017917901 |
| M14 | 4 | 165000    | 37865000  | 631  | -0.768198302 | 0.587150275 |
| M14 | 4 | 38045000  | 39555000  | 29   | 0.422760775  | 1.340490295 |
| M14 | 4 | 39735000  | 162755000 | 2046 | -0.009512402 | 0.993428195 |
| M14 | 4 | 163085000 | 187045000 | 400  | -0.746550904 | 0.596026795 |
| M14 | 4 | 187155000 | 190785000 | 65   | -0.027012623 | 0.981450476 |
| M14 | 5 | 215000    | 10395000  | 187  | 0.434068365  | 1.351038105 |
| M14 | 5 | 10575000  | 13455000  | 51   | 0.366258882  | 1.289005913 |
| M14 | 5 | 13465000  | 42545000  | 488  | 0.911144306  | 1.880536496 |
| M14 | 5 | 42825000  | 45765000  | 52   | -0.015967929 | 0.988992901 |
| M14 | 5 | 49595000  | 180695000 | 2271 | -0.73773277  | 0.599681025 |
| M14 | 6 | 405000    | 15545000  | 277  | 0.477368133  | 1.392201595 |
| M14 | 6 | 15705000  | 40045000  | 324  | 0.024300933  | 1.016986785 |
| M14 | 6 | 40225000  | 44185000  | 67   | 0.495235561  | 1.409550886 |
| M14 | 6 | 44305000  | 72625000  | 416  | -0.018077072 | 0.987548103 |
| M14 | 6 | 72805000  | 100335000 | 473  | -0.747346697 | 0.595698117 |
| M14 | 6 | 100565000 | 117545000 | 299  | 0.0066586    | 1.004626057 |
| M14 | 6 | 117875000 | 126525000 | 162  | -0.73371822  | 0.601352066 |
| M14 | 6 | 126805000 | 170815000 | 799  | -0.006570591 | 0.995455969 |

|     |    |           |           |      |              |             |
|-----|----|-----------|-----------|------|--------------|-------------|
| M14 | 7  | 145000    | 15545000  | 236  | 0.529661325  | 1.44359027  |
| M14 | 7  | 15725000  | 57805000  | 746  | -0.013235502 | 0.990867803 |
| M14 | 7  | 62505000  | 112215000 | 800  | 0.487925057  | 1.402426397 |
| M14 | 7  | 112395000 | 155965000 | 721  | -0.01005218  | 0.993056577 |
| M14 | 7  | 156145000 | 159055000 | 47   | -0.711778432 | 0.61056702  |
| M14 | 8  | 285000    | 1975000   | 30   | -0.615759511 | 0.652586247 |
| M14 | 8  | 2155000   | 20295000  | 298  | 0.078764052  | 1.056112888 |
| M14 | 8  | 20465000  | 36565000  | 295  | -0.305231819 | 0.809312162 |
| M14 | 8  | 36575000  | 54375000  | 243  | 0.504929532  | 1.419054041 |
| M14 | 8  | 54375001  | 55854999  | 25   | 1.445332125  | 2.723255085 |
| M14 | 8  | 55855000  | 116345000 | 1028 | 1.037014878  | 2.051977452 |
| M14 | 8  | 116525000 | 145145000 | 498  | -0.074401166 | 0.949736256 |
| M14 | 8  | 145215000 | 146145000 | 12   | -0.572600864 | 0.672403498 |
| M14 | 9  | 205000    | 28395000  | 516  | -0.799013686 | 0.574741972 |
| M14 | 9  | 28585000  | 129685000 | 1250 | 0.004463741  | 1.003098821 |
| M14 | 9  | 129865000 | 141015000 | 162  | -0.609990744 | 0.655200905 |
| M14 | 10 | 295000    | 22605000  | 403  | 0.472240008  | 1.387261736 |
| M14 | 10 | 22785000  | 116885000 | 1508 | -0.026006085 | 0.982135453 |
| M14 | 10 | 117265000 | 135365000 | 312  | 0.477678525  | 1.392501156 |
| M14 | 11 | 295000    | 19385000  | 309  | -0.741462404 | 0.598132741 |
| M14 | 11 | 19555000  | 126845000 | 1765 | -0.011112737 | 0.992326828 |
| M14 | 11 | 126905000 | 134905000 | 144  | -0.803576983 | 0.572926914 |
| M14 | 12 | 385000    | 13045000  | 201  | 0.897227155  | 1.862482868 |
| M14 | 12 | 13205000  | 20615000  | 127  | 0.083483217  | 1.059573169 |
| M14 | 12 | 20845000  | 42245000  | 297  | 0.517966603  | 1.431935593 |
| M14 | 12 | 42245001  | 44444999  | 40   | 1.69080934   | 3.228377622 |
| M14 | 12 | 44445000  | 68045000  | 398  | -0.70585489  | 0.613079092 |
| M14 | 12 | 68275000  | 110505000 | 748  | -0.017616528 | 0.987863403 |
| M14 | 12 | 110735000 | 120895000 | 190  | 0.451618419  | 1.367573544 |
| M14 | 12 | 120975000 | 133825000 | 220  | 0.003469074  | 1.002407472 |
| M14 | 13 | 19205000  | 24785000  | 95   | 0.009500185  | 1.006606755 |
| M14 | 13 | 25065000  | 115015000 | 1528 | -0.727035072 | 0.604144235 |
| M14 | 14 | 20495000  | 107055000 | 1502 | -0.7067198   | 0.612711655 |
| M14 | 15 | 20085000  | 24245000  | 20   | -0.256344355 | 0.837206632 |
| M14 | 15 | 24285000  | 63895000  | 664  | -0.730655933 | 0.602629861 |
| M14 | 15 | 64175000  | 66805000  | 45   | 0.523928411  | 1.437865181 |
| M14 | 15 | 67035000  | 76855000  | 170  | 0.028124167  | 1.019685439 |
| M14 | 15 | 77085000  | 79945000  | 44   | 0.466475341  | 1.381729627 |
| M14 | 15 | 80125000  | 86395000  | 97   | 0.038737531  | 1.027214542 |
| M14 | 15 | 86575000  | 97885000  | 205  | 0.449080799  | 1.365170173 |
| M14 | 15 | 98065000  | 101725000 | 68   | 0.042087116  | 1.029602253 |
| M14 | 15 | 101905000 | 102315000 | 8    | -0.620174696 | 0.650592143 |
| M14 | 16 | 195000    | 90035000  | 1266 | -0.052623079 | 0.964181679 |
| M14 | 17 | 65000     | 9865000   | 161  | -0.64477527  | 0.639592413 |
| M14 | 17 | 10045000  | 63615000  | 749  | 0.03003094   | 1.021034022 |
| M14 | 17 | 63795000  | 69595000  | 107  | 0.521426548  | 1.435373855 |
| M14 | 17 | 69655000  | 81095000  | 184  | 0.901482266  | 1.867984217 |
| M14 | 18 | 195000    | 9055000   | 164  | -0.024998884 | 0.982821359 |

|     |    |           |           |      |              |             |
|-----|----|-----------|-----------|------|--------------|-------------|
| M14 | 18 | 9065000   | 11745000  | 52   | 0.825679117  | 1.772369145 |
| M14 | 18 | 12015000  | 25015000  | 164  | 0.46570495   | 1.380991988 |
| M14 | 18 | 25195000  | 29845000  | 79   | 0.821869758  | 1.767695472 |
| M14 | 18 | 30025000  | 69695000  | 696  | -0.022271634 | 0.984681027 |
| M14 | 18 | 69755000  | 77975000  | 149  | -0.762757935 | 0.589368584 |
| M14 | 19 | 955000    | 6995000   | 70   | -0.12206702  | 0.918870197 |
| M14 | 19 | 7425000   | 18185000  | 173  | -0.682759961 | 0.622972351 |
| M14 | 19 | 18465000  | 59045000  | 558  | 0.030566148  | 1.021412874 |
| M14 | 20 | 205000    | 13875000  | 253  | -0.701550339 | 0.61491106  |
| M14 | 20 | 14105000  | 62585000  | 793  | -0.017728712 | 0.98778659  |
| M14 | 21 | 14405000  | 48095000  | 578  | -0.016887786 | 0.988362524 |
| M14 | 22 | 17335000  | 51185000  | 542  | -0.707368866 | 0.612436059 |
| M14 | X  | 2865000   | 10645000  | 147  | 0.407531603  | 1.326414426 |
| M14 | X  | 10925000  | 58085000  | 810  | -0.716483861 | 0.608578866 |
| M14 | X  | 62115000  | 90145000  | 476  | -0.025068853 | 0.982773694 |
| M14 | X  | 90315000  | 93095000  | 28   | -0.781796799 | 0.581641938 |
| M14 | X  | 93125000  | 152695000 | 1062 | -0.046759605 | 0.968108329 |
| L23 | 1  | 1305000   | 2775000   | 18   | 0.061714984  | 1.043705714 |
| L23 | 1  | 3705000   | 8445000   | 74   | -0.445190598 | 0.734487275 |
| L23 | 1  | 8545000   | 85355000  | 1318 | -0.019176932 | 0.986795518 |
| L23 | 1  | 85535000  | 106965000 | 350  | 0.276990497  | 1.21166468  |
| L23 | 1  | 107145000 | 121175000 | 218  | -0.028034492 | 0.980755556 |
| L23 | 1  | 121205000 | 151885000 | 69   | 0.308117057  | 1.238090743 |
| L23 | 1  | 151955000 | 179745000 | 488  | -0.010292115 | 0.992891436 |
| L23 | 1  | 179975000 | 239625000 | 1008 | 0.635478652  | 1.553453064 |
| L23 | 1  | 239755000 | 243285000 | 64   | 0.168029874  | 1.123523167 |
| L23 | 1  | 243295000 | 249195000 | 94   | 0.43230458   | 1.349387385 |
| L23 | 2  | 195000    | 10345000  | 183  | 0.222711073  | 1.16692438  |
| L23 | 2  | 10395000  | 14465000  | 73   | -0.202368249 | 0.869122687 |
| L23 | 2  | 14555000  | 53785000  | 701  | -0.032176315 | 0.977943949 |
| L23 | 2  | 53955000  | 60205000  | 112  | 0.181899651  | 1.134376579 |
| L23 | 2  | 60215000  | 78725000  | 315  | 0.495142027  | 1.409459504 |
| L23 | 2  | 79005000  | 190085000 | 1779 | 0.289531936  | 1.222243672 |
| L23 | 2  | 190205000 | 204235000 | 243  | 0.500811547  | 1.415009311 |
| L23 | 2  | 204465000 | 242935000 | 673  | 0.229002013  | 1.172023919 |
| L23 | 3  | 165000    | 8005000   | 152  | 0.005211471  | 1.003618848 |
| L23 | 3  | 8055000   | 58605000  | 898  | 0.191470852  | 1.141927337 |
| L23 | 3  | 58615000  | 135545000 | 1304 | -0.000110294 | 0.999923553 |
| L23 | 3  | 135825000 | 177575000 | 719  | 0.375513927  | 1.297301606 |
| L23 | 3  | 177755000 | 188345000 | 191  | -0.113990282 | 0.924028797 |
| L23 | 3  | 188525000 | 193325000 | 85   | -0.520299538 | 0.697227057 |
| L23 | 3  | 193355000 | 197635000 | 64   | 0.068861721  | 1.048888789 |
| L23 | 4  | 165000    | 5695000   | 86   | 0.130827036  | 1.094921193 |
| L23 | 4  | 5925000   | 31045000  | 431  | -0.331844811 | 0.794519861 |
| L23 | 4  | 31225000  | 40695000  | 161  | 0.290771428  | 1.223294214 |
| L23 | 4  | 40845000  | 89945000  | 778  | 0.117382613  | 1.084765058 |
| L23 | 4  | 90025000  | 98175000  | 141  | -0.267970383 | 0.830487073 |
| L23 | 4  | 98355000  | 190325000 | 1572 | 0.032076187  | 1.022482525 |

|     |    |           |           |      |              |             |
|-----|----|-----------|-----------|------|--------------|-------------|
| L23 | 5  | 55000     | 10425000  | 191  | -0.249820263 | 0.841001184 |
| L23 | 5  | 10605000  | 24295000  | 234  | 0.419841809  | 1.337780859 |
| L23 | 5  | 24675000  | 106245000 | 1306 | -0.080087266 | 0.946000423 |
| L23 | 5  | 106325000 | 130805000 | 433  | -0.429186373 | 0.742680512 |
| L23 | 5  | 130855000 | 180615000 | 888  | -0.250931472 | 0.840353668 |
| L23 | 6  | 445000    | 8045000   | 139  | -0.183525057 | 0.880548847 |
| L23 | 6  | 8305000   | 16795000  | 156  | 0.318005863  | 1.24660626  |
| L23 | 6  | 16945000  | 22815000  | 108  | 0.449186277  | 1.365269986 |
| L23 | 6  | 22825000  | 90855000  | 1001 | 0.30071987   | 1.231758878 |
| L23 | 6  | 90905000  | 170825000 | 1424 | 0.042018501  | 1.029553286 |
| L23 | 7  | 55000     | 8025000   | 116  | 0.191818008  | 1.142202152 |
| L23 | 7  | 8205000   | 79075000  | 1122 | 0.072397632  | 1.051462671 |
| L23 | 7  | 79155000  | 105825000 | 438  | 0.259307128  | 1.196903739 |
| L23 | 7  | 106005000 | 159095000 | 884  | 0.013854118  | 1.009649199 |
| L23 | 8  | 215000    | 41895000  | 726  | -0.424589819 | 0.745050531 |
| L23 | 8  | 42075000  | 51955000  | 102  | 0.090963748  | 1.06508144  |
| L23 | 8  | 52135000  | 63595000  | 204  | 0.202494491  | 1.150686229 |
| L23 | 8  | 63805000  | 131355000 | 1171 | 0.716427118  | 1.64310778  |
| L23 | 8  | 131365000 | 146235000 | 229  | 0.08201698   | 1.058496853 |
| L23 | 9  | 315000    | 72995000  | 739  | 0.307225136  | 1.237325552 |
| L23 | 9  | 73015000  | 117645000 | 803  | -0.048228937 | 0.967122848 |
| L23 | 9  | 117705000 | 123265000 | 106  | -0.491788923 | 0.711142743 |
| L23 | 9  | 123495000 | 140915000 | 277  | -0.130351536 | 0.913608808 |
| L23 | 10 | 145000    | 12745000  | 240  | 0.070329241  | 1.049956269 |
| L23 | 10 | 12925000  | 26975000  | 245  | 0.307976585  | 1.237970198 |
| L23 | 10 | 27155000  | 56535000  | 393  | 0.608494615  | 1.52466746  |
| L23 | 10 | 56545000  | 94745000  | 642  | 0.276338652  | 1.211117343 |
| L23 | 10 | 94815000  | 135395000 | 706  | -0.026155234 | 0.982033922 |
| L23 | 11 | 475000    | 76915000  | 1199 | 0.314909446  | 1.243933572 |
| L23 | 11 | 76925000  | 109645000 | 571  | -0.032678702 | 0.977603461 |
| L23 | 11 | 109775000 | 134945000 | 451  | 0.193824118  | 1.143791523 |
| L23 | 12 | 525000    | 11045000  | 168  | 0.612532728  | 1.528940992 |
| L23 | 12 | 11275000  | 29045000  | 303  | 1.008158458  | 2.011342064 |
| L23 | 12 | 29045001  | 29324999  | 5    | 0.58555362   | 1.500614725 |
| L23 | 12 | 29325000  | 133825000 | 1755 | -0.007913554 | 0.994529759 |
| L23 | 13 | 19255000  | 30695000  | 199  | -0.131143682 | 0.913107306 |
| L23 | 13 | 30745000  | 38295000  | 136  | 0.209837723  | 1.156558084 |
| L23 | 13 | 38565000  | 48455000  | 170  | -0.096546515 | 0.935269136 |
| L23 | 13 | 48465000  | 95925000  | 777  | 0.492325849  | 1.406710886 |
| L23 | 13 | 96105000  | 115065000 | 338  | 0.010685202  | 1.007433913 |
| L23 | 14 | 20545000  | 78675000  | 1008 | -0.01666445  | 0.988515539 |
| L23 | 14 | 78705000  | 88675000  | 181  | -0.357536248 | 0.780496329 |
| L23 | 14 | 88855000  | 107245000 | 312  | -0.148101407 | 0.902437293 |
| L23 | 15 | 20055000  | 25525000  | 41   | 0.165077551  | 1.121226347 |
| L23 | 15 | 25535000  | 93175000  | 1136 | 0.03391398   | 1.023785856 |
| L23 | 15 | 93355000  | 102235000 | 165  | 0.16277157   | 1.119435628 |
| L23 | 16 | 105000    | 90095000  | 1269 | -0.01709667  | 0.988219432 |
| L23 | 17 | 105000    | 48525000  | 665  | 0.067547     | 1.047933377 |

|     |    |           |           |      |              |             |
|-----|----|-----------|-----------|------|--------------|-------------|
| L23 | 17 | 48805000  | 81095000  | 541  | 0.563557688  | 1.477909254 |
| L23 | 18 | 165000    | 13785000  | 249  | 0.384805953  | 1.305684157 |
| L23 | 18 | 14015000  | 77975000  | 1062 | 0.036312263  | 1.025489175 |
| L23 | 19 | 955000    | 15865000  | 207  | 0.067293097  | 1.047748966 |
| L23 | 19 | 15955000  | 43885000  | 387  | 0.307448578  | 1.237517201 |
| L23 | 19 | 44115000  | 58965000  | 206  | 0.451202096  | 1.367178956 |
| L23 | 20 | 195000    | 3335000   | 58   | -0.204793475 | 0.867662886 |
| L23 | 20 | 3345000   | 29905000  | 422  | 0.213527964  | 1.159520209 |
| L23 | 20 | 29915000  | 47385000  | 314  | -0.051240797 | 0.965105928 |
| L23 | 20 | 47395000  | 62845000  | 258  | 0.173783458  | 1.128012815 |
| L23 | 21 | 14655000  | 25945000  | 172  | 0.382768628  | 1.303841615 |
| L23 | 21 | 25985000  | 48005000  | 401  | 0.035862755  | 1.025169708 |
| L23 | 22 | 17235000  | 44595000  | 443  | 0.228925244  | 1.171961555 |
| L23 | 22 | 44825000  | 50995000  | 95   | -0.430237293 | 0.742139709 |
| L23 | X  | 2755000   | 14955000  | 226  | -0.255531308 | 0.837678582 |
| L23 | X  | 15185000  | 73695000  | 938  | -0.07977492  | 0.946205256 |
| L23 | X  | 73805000  | 88195000  | 261  | 0.193229915  | 1.143320526 |
| L23 | X  | 88405000  | 143485000 | 939  | -0.33128544  | 0.794827977 |
| L23 | X  | 143495000 | 152695000 | 159  | 0.035321592  | 1.024785233 |
| M16 | 1  | 1305000   | 54705000  | 862  | -0.083530304 | 0.943745455 |
| M16 | 1  | 54805000  | 121335000 | 1130 | -0.141293126 | 0.906706086 |
| M16 | 1  | 121335001 | 145564999 | 5    | 0.53186721   | 1.445799212 |
| M16 | 1  | 145565000 | 153105000 | 83   | 0.67949123   | 1.601574856 |
| M16 | 1  | 153105001 | 153434999 | 6    | 0.556195654  | 1.470386733 |
| M16 | 1  | 153435000 | 248035000 | 1628 | 0.621307738  | 1.538268921 |
| M16 | 2  | 15000     | 23825000  | 428  | -0.179164444 | 0.883214373 |
| M16 | 2  | 23835000  | 44315000  | 365  | -0.085150278 | 0.942686336 |
| M16 | 2  | 44545000  | 143975000 | 1572 | -0.131526942 | 0.912864767 |
| M16 | 2  | 144005000 | 162655000 | 332  | -0.117605906 | 0.921715932 |
| M16 | 2  | 162835000 | 201645000 | 671  | -0.132984305 | 0.911943086 |
| M16 | 2  | 201705000 | 226225000 | 432  | -0.107044301 | 0.928488341 |
| M16 | 2  | 226505000 | 242975000 | 286  | -0.149898161 | 0.901314083 |
| M16 | 3  | 205000    | 197695000 | 3423 | 0.004216889  | 1.002927201 |
| M16 | 4  | 115000    | 190795000 | 3186 | -0.152938433 | 0.899416694 |
| M16 | 5  | 105000    | 180645000 | 3060 | 0.009840528  | 1.00684425  |
| M16 | 6  | 225000    | 62965000  | 928  | 0.009101321  | 1.006328496 |
| M16 | 6  | 63145000  | 170875000 | 1906 | 0.255985276  | 1.194151    |
| M16 | 7  | 355000    | 159095000 | 2564 | 0.307486294  | 1.237549553 |
| M16 | 8  | 325000    | 146255000 | 2440 | 0.000556976  | 1.000386141 |
| M16 | 9  | 335000    | 140995000 | 1931 | -0.142245799 | 0.906107547 |
| M16 | 10 | 155000    | 135425000 | 2234 | -0.011256131 | 0.992228202 |
| M16 | 11 | 205000    | 85695000  | 1366 | 0.025692793  | 1.017968411 |
| M16 | 11 | 85865000  | 134735000 | 852  | -0.341450166 | 0.789247578 |
| M16 | 12 | 215000    | 133845000 | 2238 | 0.025803369  | 1.018046436 |
| M16 | 13 | 19375000  | 103535000 | 1425 | -0.096241777 | 0.935466712 |
| M16 | 13 | 103765000 | 114975000 | 195  | -0.154255184 | 0.898596169 |
| M16 | 14 | 20505000  | 102735000 | 1446 | 0.023716021  | 1.016574552 |
| M16 | 14 | 102905000 | 107215000 | 55   | 0.532745498  | 1.446679659 |

|     |    |           |           |      |              |             |
|-----|----|-----------|-----------|------|--------------|-------------|
| M16 | 15 | 22845000  | 96825000  | 1242 | -0.036037019 | 0.975330434 |
| M16 | 15 | 96835000  | 102355000 | 102  | -0.114128698 | 0.923940147 |
| M16 | 16 | 535000    | 3195000   | 25   | 0.393139356  | 1.313247971 |
| M16 | 16 | 3255000   | 7275000   | 72   | 0.458216016  | 1.373841924 |
| M16 | 16 | 7455000   | 90045000  | 1161 | 0.034927451  | 1.024505302 |
| M16 | 17 | 75000     | 81055000  | 1209 | 0.082767048  | 1.059047317 |
| M16 | 18 | 205000    | 77775000  | 1310 | -0.155916252 | 0.897562152 |
| M16 | 19 | 255000    | 59045000  | 810  | 0.079123763  | 1.056376244 |
| M16 | 20 | 245000    | 1985000   | 32   | -0.265368695 | 0.831986085 |
| M16 | 20 | 2165000   | 62845000  | 1016 | 0.01977627   | 1.013802249 |
| M16 | 21 | 14605000  | 48025000  | 576  | 0.032938958  | 1.02309418  |
| M16 | 22 | 17305000  | 34145000  | 265  | -0.083936895 | 0.943479519 |
| M16 | 22 | 34295000  | 50995000  | 273  | -0.114779468 | 0.923523471 |
| M16 | X  | 2745000   | 152565000 | 2529 | -0.010461788 | 0.992774671 |
| M28 | 1  | 1305000   | 119695000 | 1981 | 0.007936791  | 1.005516525 |
| M28 | 1  | 119755000 | 248175000 | 1736 | 0.27192256   | 1.207415779 |
| M28 | 2  | 5000      | 243045000 | 4099 | -0.002094858 | 0.998549009 |
| M28 | 3  | 265000    | 197765000 | 3422 | 0.002108133  | 1.001462314 |
| M28 | 4  | 235000    | 190715000 | 3181 | -0.002462485 | 0.998294592 |
| M28 | 5  | 135000    | 180595000 | 3058 | -0.002712547 | 0.998121572 |
| M28 | 6  | 205000    | 170845000 | 2837 | -0.001000467 | 0.999306769 |
| M28 | 7  | 105000    | 158985000 | 2564 | 0.005339825  | 1.003708143 |
| M28 | 8  | 205000    | 146125000 | 2441 | 0.005612435  | 1.00389782  |
| M28 | 9  | 245000    | 141045000 | 1934 | -0.001685768 | 0.998832197 |
| M28 | 10 | 305000    | 135435000 | 2232 | 0.000605543  | 1.000419819 |
| M28 | 11 | 605000    | 134925000 | 2222 | -0.018338834 | 0.987368939 |
| M28 | 12 | 205000    | 133805000 | 2237 | 0.0075914    | 1.005275826 |
| M28 | 13 | 19205000  | 114935000 | 1625 | -0.016050248 | 0.988936472 |
| M28 | 14 | 19105000  | 107125000 | 1506 | 0.005023765  | 1.003488278 |
| M28 | 15 | 20055000  | 102355000 | 1347 | 0.003641051  | 1.002526971 |
| M28 | 16 | 275000    | 46915000  | 510  | 0.03690184   | 1.025908341 |
| M28 | 16 | 47085000  | 90125000  | 754  | -0.307317217 | 0.808143157 |
| M28 | 17 | 145000    | 81085000  | 1208 | 0.020442249  | 1.01427035  |
| M28 | 18 | 255000    | 77845000  | 1310 | -0.008961267 | 0.993807775 |
| M28 | 19 | 265000    | 58985000  | 809  | 0.025176714  | 1.017604329 |
| M28 | 20 | 205000    | 62845000  | 1052 | 0.006545487  | 1.004547293 |
| M28 | 21 | 14665000  | 48015000  | 574  | -0.008084202 | 0.994412129 |
| M28 | 22 | 17235000  | 51165000  | 542  | -0.005138807 | 0.996444387 |
| M28 | X  | 2705000   | 147055000 | 2442 | -0.014962388 | 0.989682457 |
| M28 | X  | 147225000 | 152665000 | 87   | -0.099792866 | 0.933166961 |
| M9  | 1  | 1305000   | 121235000 | 1992 | -0.016728001 | 0.988471996 |
| M9  | 1  | 145165000 | 248895000 | 1724 | 0.348294126  | 1.27305445  |
| M9  | 2  | 125000    | 242915000 | 4094 | -0.009800039 | 0.99323015  |
| M9  | 3  | 105000    | 197775000 | 3426 | 0.049996866  | 1.035262675 |
| M9  | 4  | 255000    | 190465000 | 3180 | 0.006294015  | 1.004372209 |
| M9  | 5  | 95000     | 180605000 | 3059 | 0.000883862  | 1.000612834 |
| M9  | 6  | 435000    | 170795000 | 2834 | -0.010288917 | 0.992893637 |
| M9  | 7  | 55000     | 158925000 | 2564 | 0.011505831  | 1.008007121 |

|     |    |           |           |      |              |             |
|-----|----|-----------|-----------|------|--------------|-------------|
| M9  | 8  | 155000    | 146105000 | 2441 | 9.61E-05     | 1.00006661  |
| M9  | 9  | 235000    | 141015000 | 1933 | -0.025770598 | 0.982295777 |
| M9  | 10 | 255000    | 135305000 | 2230 | 0.005262075  | 1.003654052 |
| M9  | 11 | 235000    | 134835000 | 2222 | -0.011859346 | 0.991813422 |
| M9  | 12 | 315000    | 133385000 | 2234 | -0.020676831 | 0.985770128 |
| M9  | 13 | 19215000  | 115045000 | 1627 | -0.011320116 | 0.992184197 |
| M9  | 14 | 20525000  | 107095000 | 1503 | -0.000782869 | 0.999457504 |
| M9  | 15 | 20175000  | 102315000 | 1345 | -0.001804587 | 0.998749938 |
| M9  | 16 | 195000    | 47545000  | 521  | 0.079777129  | 1.056854762 |
| M9  | 16 | 47655000  | 90055000  | 743  | -0.184496414 | 0.879956179 |
| M9  | 17 | 85000     | 20725000  | 342  | -0.17011698  | 0.888770613 |
| M9  | 17 | 20955000  | 81065000  | 862  | 0.045660855  | 1.032155871 |
| M9  | 18 | 205000    | 77895000  | 1312 | -0.141909982 | 0.906318487 |
| M9  | 19 | 375000    | 22605000  | 314  | 0.132543071  | 1.096224339 |
| M9  | 19 | 22785000  | 59035000  | 490  | 0.064131357  | 1.045455284 |
| M9  | 20 | 265000    | 62755000  | 1049 | 0.003755856  | 1.002606753 |
| M9  | 21 | 14435000  | 40465000  | 440  | 0.004344844  | 1.003016156 |
| M9  | 21 | 40555000  | 48075000  | 136  | -0.101994597 | 0.931743919 |
| M9  | 22 | 17355000  | 50975000  | 540  | 0.026039763  | 1.018213263 |
| M9  | X  | 2755000   | 152695000 | 2532 | -0.0514492   | 0.964966524 |
| L12 | 1  | 1305000   | 73185000  | 1195 | -0.062873607 | 0.957355327 |
| L12 | 1  | 73195000  | 110745000 | 635  | -0.173614327 | 0.886618686 |
| L12 | 1  | 110915000 | 249195000 | 1888 | 0.005054181  | 1.003509435 |
| L12 | 2  | 105000    | 242895000 | 4094 | 0.001540641  | 1.001068462 |
| L12 | 3  | 115000    | 29665000  | 540  | -0.019967239 | 0.9862551   |
| L12 | 3  | 29835000  | 89015000  | 1045 | -0.163908379 | 0.892603656 |
| L12 | 3  | 89025000  | 197635000 | 1835 | -0.00967669  | 0.993315074 |
| L12 | 4  | 155000    | 36085000  | 597  | -0.391092207 | 0.762552088 |
| L12 | 4  | 36255000  | 53845000  | 253  | -0.082965584 | 0.944114941 |
| L12 | 4  | 53855000  | 190745000 | 2331 | 0.179866405  | 1.132778984 |
| L12 | 5  | 135000    | 149755000 | 2510 | -0.036280585 | 0.975165786 |
| L12 | 5  | 149925000 | 180565000 | 544  | 0.257918563  | 1.195752298 |
| L12 | 6  | 435000    | 170795000 | 2834 | 0.005415801  | 1.003761002 |
| L12 | 7  | 115000    | 159095000 | 2566 | 0.001323403  | 1.000917734 |
| L12 | 8  | 315000    | 27675000  | 467  | -0.380723913 | 0.768052102 |
| L12 | 8  | 27895000  | 47095000  | 280  | 0.406335479  | 1.325315166 |
| L12 | 8  | 47495000  | 139635000 | 1612 | 0.166933919  | 1.122669998 |
| L12 | 8  | 139645000 | 146245000 | 75   | 0.209148409  | 1.156005618 |
| L12 | 9  | 365000    | 30295000  | 546  | -0.375503073 | 0.770836572 |
| L12 | 9  | 30545000  | 140995000 | 1381 | 0.00011237   | 1.000077892 |
| L12 | 10 | 155000    | 75205000  | 1192 | -0.034096049 | 0.976643506 |
| L12 | 10 | 75215000  | 135345000 | 1040 | -0.150767646 | 0.900771042 |
| L12 | 11 | 205000    | 5435000   | 64   | -0.398986734 | 0.758390746 |
| L12 | 11 | 5655000   | 15145000  | 172  | 0.294694236  | 1.226624979 |
| L12 | 11 | 15215000  | 21715000  | 113  | -0.03992214  | 0.972707441 |
| L12 | 11 | 21905000  | 36785000  | 254  | 0.311274843  | 1.240803656 |
| L12 | 11 | 36955000  | 48455000  | 212  | -0.005241394 | 0.996373534 |
| L12 | 11 | 48625000  | 51405000  | 17   | -0.384198842 | 0.766204369 |

|     |    |           |           |      |              |             |
|-----|----|-----------|-----------|------|--------------|-------------|
| L12 | 11 | 55075000  | 68595000  | 220  | -0.004806744 | 0.996673763 |
| L12 | 11 | 68685000  | 72685000  | 61   | 0.369526479  | 1.291928725 |
| L12 | 11 | 72855000  | 134915000 | 1090 | -0.366752413 | 0.775526286 |
| L12 | 12 | 385000    | 25615000  | 415  | -0.377870807 | 0.769572522 |
| L12 | 12 | 25785000  | 133455000 | 1813 | -0.002387856 | 0.998346233 |
| L12 | 13 | 19225000  | 115095000 | 1628 | -0.369170524 | 0.77422751  |
| L12 | 14 | 19145000  | 107205000 | 1505 | -0.002060848 | 0.998572549 |
| L12 | 15 | 22825000  | 102305000 | 1344 | -0.040438261 | 0.97235952  |
| L12 | 16 | 175000    | 90045000  | 1267 | -0.021407544 | 0.985270971 |
| L12 | 17 | 25000     | 18825000  | 317  | -0.383937369 | 0.766343248 |
| L12 | 17 | 18825001  | 19544999  | 8    | 0.654938812  | 1.574549171 |
| L12 | 17 | 19545000  | 20205000  | 13   | 0.34656757   | 1.271531824 |
| L12 | 17 | 20575000  | 49145000  | 334  | 0.446413101  | 1.362648159 |
| L12 | 17 | 49145001  | 50764999  | 29   | 0.687958537  | 1.611002281 |
| L12 | 17 | 50765000  | 59605000  | 145  | -0.254043028 | 0.838543175 |
| L12 | 17 | 59705000  | 80855000  | 355  | 0.53128385   | 1.445214716 |
| L12 | 18 | 75000     | 13985000  | 253  | -0.140142917 | 0.907429258 |
| L12 | 18 | 13995000  | 77895000  | 1061 | -0.018412435 | 0.987318568 |
| L12 | 19 | 365000    | 59025000  | 808  | 0.004931758  | 1.003424284 |
| L12 | 20 | 245000    | 53035000  | 899  | -0.067781429 | 0.954104088 |
| L12 | 20 | 53155000  | 62885000  | 151  | 0.224502105  | 1.168373956 |
| L12 | 21 | 14655000  | 48045000  | 575  | -0.012304095 | 0.991507716 |
| L12 | 22 | 16935000  | 51105000  | 542  | -0.030358343 | 0.979177055 |
| L12 | X  | 2825000   | 31385000  | 524  | -0.374344493 | 0.771455854 |
| L12 | X  | 31605000  | 36745000  | 87   | 0.055934615  | 1.039532321 |
| L12 | X  | 36855000  | 40315000  | 60   | -0.417151283 | 0.748901932 |
| L12 | X  | 40485000  | 98665000  | 888  | 0.003061437  | 1.002124279 |
| L12 | X  | 98665001  | 98884999  | 5    | 0.30161749   | 1.232525496 |
| L12 | X  | 98885000  | 152695000 | 959  | 0.256498972  | 1.194576273 |
| L24 | 1  | 1305000   | 121335000 | 1994 | 0.003890273  | 1.002700171 |
| L24 | 1  | 145455000 | 248865000 | 1721 | 0.376780431  | 1.298440973 |
| L24 | 2  | 85000     | 243015000 | 4096 | 0.000431471  | 1.000299117 |
| L24 | 3  | 235000    | 90205000  | 1606 | -0.16250004  | 0.893475429 |
| L24 | 3  | 93675000  | 106295000 | 221  | 0.064947995  | 1.046047232 |
| L24 | 3  | 106385000 | 197635000 | 1589 | 0.060122391  | 1.042554202 |
| L24 | 4  | 155000    | 190345000 | 3182 | 0.001562833  | 1.00108386  |
| L24 | 5  | 65000     | 180645000 | 3061 | 0.004519717  | 1.003137741 |
| L24 | 6  | 465000    | 170745000 | 2833 | -0.042842236 | 0.970740618 |
| L24 | 7  | 55000     | 159025000 | 2566 | 0.007290552  | 1.005066216 |
| L24 | 8  | 245000    | 43345000  | 748  | -0.183893871 | 0.88032377  |
| L24 | 8  | 47065000  | 146225000 | 1690 | 0.177483658  | 1.130909637 |
| L24 | 9  | 295000    | 141025000 | 1933 | 2.06E-05     | 1.000014276 |
| L24 | 10 | 295000    | 7825000   | 147  | 0.012608316  | 1.008777719 |
| L24 | 10 | 7995000   | 28745000  | 368  | 0.151462019  | 1.110694473 |
| L24 | 10 | 28785000  | 135365000 | 1711 | -0.004871768 | 0.996628843 |
| L24 | 11 | 285000    | 72875000  | 1133 | 0.002465363  | 1.00171032  |
| L24 | 11 | 73145000  | 78525000  | 92   | 0.122276547  | 1.088451064 |
| L24 | 11 | 78695000  | 84355000  | 107  | -0.227350435 | 0.854202227 |



|     |    |           |           |      |              |             |
|-----|----|-----------|-----------|------|--------------|-------------|
| L24 | 11 | 84525000  | 87215000  | 46   | 0.15216735   | 1.111237623 |
| L24 | 11 | 87355000  | 134895000 | 832  | -0.194524112 | 0.873861101 |
| L24 | 12 | 335000    | 120095000 | 2002 | 0.024013625  | 1.016784276 |
| L24 | 12 | 120225000 | 125545000 | 89   | 0.110966271  | 1.079951311 |
| L24 | 12 | 125555000 | 133495000 | 141  | -0.023840965 | 0.983610496 |
| L24 | 13 | 19255000  | 53165000  | 587  | -0.167724373 | 0.890245799 |
| L24 | 13 | 53335000  | 69095000  | 252  | -0.20166675  | 0.869545395 |
| L24 | 13 | 69115000  | 114985000 | 782  | -0.012105062 | 0.991644513 |
| L24 | 14 | 20455000  | 107075000 | 1504 | 0.005195172  | 1.00360751  |
| L24 | 15 | 20055000  | 102345000 | 1347 | -0.003286754 | 0.997724389 |
| L24 | 16 | 155000    | 90035000  | 1267 | -0.016029426 | 0.988950745 |
| L24 | 17 | 55000     | 46325000  | 628  | -0.000558635 | 0.999612859 |
| L24 | 17 | 46495000  | 80915000  | 575  | 0.629226061  | 1.546735019 |
| L24 | 18 | 85000     | 77835000  | 1312 | -0.000284189 | 0.999803035 |
| L24 | 19 | 305000    | 58995000  | 808  | 0.042224507  | 1.029700309 |
| L24 | 20 | 215000    | 62805000  | 1051 | -0.006829159 | 0.995277574 |
| L24 | 21 | 14625000  | 48005000  | 575  | -0.077757337 | 0.947529433 |
| L24 | 22 | 16905000  | 51155000  | 544  | -0.040644446 | 0.972220563 |
| L24 | X  | 2705000   | 152555000 | 2530 | -0.00071061  | 0.999507564 |
| M22 | 1  | 1305000   | 121245000 | 1992 | 0.02993738   | 1.02096781  |
| M22 | 1  | 145175000 | 248125000 | 1722 | 0.336824477  | 1.262973595 |
| M22 | 2  | 5000      | 242995000 | 4098 | -0.008397766 | 0.994196021 |
| M22 | 3  | 145000    | 197755000 | 3424 | -0.01105567  | 0.992366081 |
| M22 | 4  | 235000    | 190465000 | 3180 | -0.013866495 | 0.990434521 |
| M22 | 5  | 95000     | 180685000 | 3061 | -0.022949206 | 0.984218673 |
| M22 | 6  | 515000    | 39645000  | 595  | 0.008509671  | 1.005915885 |
| M22 | 6  | 39715000  | 76475000  | 562  | -0.387476261 | 0.764465733 |
| M22 | 6  | 76505000  | 78295000  | 35   | 0.02802268   | 1.019613712 |
| M22 | 6  | 78495000  | 170855000 | 1638 | -0.49054127  | 0.71175801  |
| M22 | 7  | 335000    | 159075000 | 2564 | -0.001968193 | 0.998636683 |
| M22 | 8  | 305000    | 146095000 | 2438 | -0.029513528 | 0.97975061  |
| M22 | 9  | 225000    | 140995000 | 1934 | 0.002438674  | 1.001691789 |
| M22 | 10 | 275000    | 135385000 | 2232 | 0.006030556  | 1.004188811 |
| M22 | 11 | 465000    | 134805000 | 2220 | -0.015806352 | 0.989103671 |
| M22 | 12 | 235000    | 133755000 | 2235 | 0.001901083  | 1.001318599 |
| M22 | 13 | 19285000  | 115015000 | 1624 | -0.016406706 | 0.988692158 |
| M22 | 14 | 20495000  | 107075000 | 1503 | -0.000900589 | 0.999375954 |
| M22 | 15 | 20155000  | 102335000 | 1346 | 0.029645835  | 1.02076151  |
| M22 | 16 | 515000    | 46695000  | 504  | 0.006347791  | 1.004409647 |
| M22 | 16 | 46855000  | 90105000  | 758  | -0.486551046 | 0.713729324 |
| M22 | 17 | 135000    | 81055000  | 1207 | 0.052264905  | 1.036891475 |
| M22 | 18 | 235000    | 77845000  | 1310 | -0.014349331 | 0.990103101 |
| M22 | 19 | 325000    | 59005000  | 808  | 0.067223625  | 1.047698513 |
| M22 | 20 | 235000    | 62785000  | 1050 | -0.000485309 | 0.999663666 |
| M22 | 21 | 14615000  | 48055000  | 576  | 0.018724685  | 1.013063555 |
| M22 | 22 | 17335000  | 18025000  | 11   | 0.161795472  | 1.118678497 |
| M22 | 22 | 18035000  | 51115000  | 529  | -0.403937343 | 0.755792788 |
| M22 | X  | 2795000   | 152695000 | 2531 | 0.031582743  | 1.022132866 |

|     |   |           |           |      |              |             |
|-----|---|-----------|-----------|------|--------------|-------------|
| M15 | 1 | 1305000   | 6895000   | 70   | 0.206285358  | 1.153713781 |
| M15 | 1 | 7085000   | 112075000 | 1782 | 0.354152529  | 1.278234497 |
| M15 | 1 | 112155000 | 163945000 | 408  | 1.246594684  | 2.372806877 |
| M15 | 1 | 163985000 | 186685000 | 409  | 0.749588205  | 1.681312857 |
| M15 | 1 | 186695000 | 218645000 | 516  | 0.927263376  | 1.901665336 |
| M15 | 1 | 218815000 | 248875000 | 526  | 0.683552695  | 1.606089951 |
| M15 | 2 | 95000     | 43655000  | 779  | -0.01981931  | 0.986356233 |
| M15 | 2 | 43805000  | 123655000 | 1242 | 0.370043712  | 1.292391988 |
| M15 | 2 | 123705000 | 143645000 | 336  | 0.249728639  | 1.188983454 |
| M15 | 2 | 143825000 | 205715000 | 1082 | 0.358928555  | 1.282473091 |
| M15 | 2 | 205885000 | 243025000 | 648  | -0.000116152 | 0.999919493 |
| M15 | 3 | 205000    | 14545000  | 256  | 0.394344764  | 1.314345682 |
| M15 | 3 | 14605000  | 112015000 | 1676 | -0.002477265 | 0.998284364 |
| M15 | 3 | 112185000 | 113545000 | 24   | 0.679029791  | 1.601062682 |
| M15 | 3 | 113725000 | 127865000 | 249  | -0.023117521 | 0.984103855 |
| M15 | 3 | 127905000 | 150765000 | 399  | 0.607417352  | 1.523529412 |
| M15 | 3 | 150935000 | 197795000 | 809  | 0.823553991  | 1.769760323 |
| M15 | 4 | 265000    | 130695000 | 2159 | -0.056238216 | 0.961768636 |
| M15 | 4 | 130755000 | 190735000 | 1022 | -0.245757973 | 0.843372583 |
| M15 | 5 | 55000     | 8285000   | 149  | 0.463817797  | 1.379186728 |
| M15 | 5 | 8455000   | 18015000  | 176  | 0.639480505  | 1.557768127 |
| M15 | 5 | 18185000  | 54175000  | 539  | 0.349812843  | 1.274395292 |
| M15 | 5 | 54345000  | 68795000  | 261  | -0.446538884 | 0.733801173 |
| M15 | 5 | 70815000  | 73645000  | 54   | 0.356326191  | 1.280161824 |
| M15 | 5 | 73915000  | 180615000 | 1866 | 0.001261189  | 1.000874571 |
| M15 | 6 | 435000    | 15075000  | 267  | 0.357921795  | 1.281578451 |
| M15 | 6 | 15245000  | 20725000  | 100  | 0.702258037  | 1.62704938  |
| M15 | 6 | 20945000  | 25145000  | 80   | 0.056045591  | 1.039612288 |
| M15 | 6 | 25365000  | 62405000  | 459  | 0.427564859  | 1.344961485 |
| M15 | 6 | 62575000  | 69795000  | 116  | 0.792836586  | 1.732477465 |
| M15 | 6 | 69925000  | 170845000 | 1799 | 0.888388464  | 1.851107223 |
| M15 | 7 | 145000    | 30095000  | 506  | 0.043288755  | 1.030460179 |
| M15 | 7 | 30235000  | 84885000  | 814  | 0.644981251  | 1.563718964 |
| M15 | 7 | 85155000  | 99605000  | 247  | 0.011521683  | 1.008018197 |
| M15 | 7 | 99825000  | 131325000 | 537  | 0.574313007  | 1.488968266 |
| M15 | 7 | 131505000 | 132575000 | 18   | 0.47713779   | 1.391979332 |
| M15 | 7 | 132745000 | 143145000 | 173  | 0.571419936  | 1.485985395 |
| M15 | 7 | 143645000 | 157445000 | 231  | -0.15084255  | 0.900724276 |
| M15 | 7 | 157765000 | 159095000 | 21   | 0.466678034  | 1.381923768 |
| M15 | 8 | 235000    | 6825000   | 124  | 0.248112387  | 1.187652181 |
| M15 | 8 | 8145000   | 33105000  | 439  | -0.487592178 | 0.713214442 |
| M15 | 8 | 33275000  | 82165000  | 785  | 0.337226344  | 1.263325449 |
| M15 | 8 | 82305000  | 83195000  | 16   | 0.848462627  | 1.800581157 |
| M15 | 8 | 83365000  | 96615000  | 222  | 0.300849327  | 1.231869412 |
| M15 | 8 | 96785000  | 102815000 | 110  | 0.630526135  | 1.548129476 |
| M15 | 8 | 102985000 | 146145000 | 725  | 0.998311986  | 1.997661284 |
| M15 | 9 | 1225000   | 34635000  | 605  | 1.517035564  | 2.862023592 |
| M15 | 9 | 34635001  | 34954999  | 6    | 1.251790457  | 2.381367794 |

|     |    |           |           |      |              |             |
|-----|----|-----------|-----------|------|--------------|-------------|
| M15 | 9  | 34955000  | 37275000  | 44   | 0.094041216  | 1.067355831 |
| M15 | 9  | 37445000  | 86095000  | 302  | 0.372900459  | 1.294953649 |
| M15 | 9  | 86105000  | 140995000 | 956  | 0.040036216  | 1.028139635 |
| M15 | 10 | 265000    | 12865000  | 241  | 0.309190489  | 1.239012282 |
| M15 | 10 | 13035000  | 24195000  | 190  | 0.647179694  | 1.566103646 |
| M15 | 10 | 24465000  | 65275000  | 600  | 0.357656354  | 1.281342676 |
| M15 | 10 | 65445000  | 126495000 | 1051 | -0.005561545 | 0.996152451 |
| M15 | 10 | 126625000 | 129365000 | 45   | 0.57882522   | 1.493632495 |
| M15 | 10 | 129535000 | 135315000 | 88   | -0.120822022 | 0.919663493 |
| M15 | 11 | 235000    | 8245000   | 115  | 0.182985948  | 1.135231045 |
| M15 | 11 | 8355000   | 70795000  | 985  | 0.385148297  | 1.305994025 |
| M15 | 11 | 70965000  | 134925000 | 1119 | -0.039859129 | 0.972749926 |
| M15 | 12 | 395000    | 2645000   | 35   | 0.375126855  | 1.296953589 |
| M15 | 12 | 2755000   | 16905000  | 231  | 0.884197561  | 1.845737721 |
| M15 | 12 | 17175000  | 18395000  | 24   | 0.32289428   | 1.250837416 |
| M15 | 12 | 18655000  | 33885000  | 259  | 0.68383899   | 1.606408702 |
| M15 | 12 | 34055000  | 39325000  | 25   | 0.362588726  | 1.285730903 |
| M15 | 12 | 39495000  | 45615000  | 108  | 0.652668995  | 1.572073854 |
| M15 | 12 | 45625000  | 47485000  | 33   | 0.420251085  | 1.338160426 |
| M15 | 12 | 47655000  | 55995000  | 135  | 0.097687143  | 1.070056625 |
| M15 | 12 | 56075000  | 76145000  | 343  | 0.349456332  | 1.27408041  |
| M15 | 12 | 76205000  | 90115000  | 225  | -0.472580499 | 0.720674399 |
| M15 | 12 | 90155000  | 127345000 | 691  | 0.006913947  | 1.004803885 |
| M15 | 12 | 127565000 | 133775000 | 105  | 0.232631973  | 1.174976558 |
| M15 | 13 | 19295000  | 41765000  | 395  | -0.008792826 | 0.993923812 |
| M15 | 13 | 42135000  | 114985000 | 1225 | 0.608158512  | 1.5243123   |
| M15 | 14 | 20455000  | 107245000 | 1506 | 0.009402922  | 1.006538895 |
| M15 | 15 | 20155000  | 38715000  | 243  | 0.339684469  | 1.265479792 |
| M15 | 15 | 38885000  | 73105000  | 599  | 0.056984699  | 1.040289233 |
| M15 | 15 | 73255000  | 89145000  | 259  | 0.32978617   | 1.256827079 |
| M15 | 15 | 89175000  | 102395000 | 240  | 0.611793215  | 1.528157471 |
| M15 | 16 | 355000    | 2755000   | 21   | 0.497849095  | 1.412106691 |
| M15 | 16 | 2925000   | 28915000  | 426  | 1.010772223  | 2.014989363 |
| M15 | 16 | 29135000  | 47865000  | 72   | 0.377283733  | 1.298894029 |
| M15 | 16 | 48035000  | 59165000  | 203  | 0.021627498  | 1.015103969 |
| M15 | 16 | 59335000  | 67495000  | 142  | -0.490113632 | 0.711969018 |
| M15 | 16 | 67505000  | 90115000  | 387  | 0.007262436  | 1.005046629 |
| M15 | 17 | 135000    | 53545000  | 751  | 0.075317328  | 1.053592754 |
| M15 | 17 | 53715000  | 81075000  | 454  | 0.437019926  | 1.353804978 |
| M15 | 18 | 245000    | 63265000  | 1059 | 0.346227871  | 1.271232462 |
| M15 | 18 | 63355000  | 77845000  | 250  | 0.252286801  | 1.19109361  |
| M15 | 19 | 315000    | 39795000  | 535  | 0.950745855  | 1.93287167  |
| M15 | 19 | 40085000  | 52875000  | 178  | 0.116622794  | 1.084193899 |
| M15 | 19 | 52885000  | 58985000  | 92   | 0.386993677  | 1.307665618 |
| M15 | 20 | 205000    | 16315000  | 297  | 0.329700866  | 1.256752767 |
| M15 | 20 | 16485000  | 30195000  | 185  | 0.544592508  | 1.4586083   |
| M15 | 20 | 30305000  | 51965000  | 391  | 0.36010158   | 1.283516266 |
| M15 | 20 | 52135000  | 62825000  | 169  | 0.613811042  | 1.530296325 |

|     |    |           |           |      |              |             |
|-----|----|-----------|-----------|------|--------------|-------------|
| M15 | 21 | 14645000  | 25135000  | 157  | 0.910644215  | 1.879884747 |
| M15 | 21 | 25305000  | 38585000  | 243  | 0.355234317  | 1.279193326 |
| M15 | 21 | 38755000  | 45345000  | 120  | 0.118863794  | 1.085879333 |
| M15 | 21 | 45405000  | 48055000  | 48   | 0.466458698  | 1.381713688 |
| M15 | 22 | 17325000  | 35735000  | 296  | 0.646833541  | 1.565727927 |
| M15 | 22 | 35905000  | 37815000  | 33   | -0.032024268 | 0.978047022 |
| M15 | 22 | 38035000  | 51185000  | 207  | 0.637491789  | 1.555622266 |
| M15 | X  | 2855000   | 39235000  | 656  | 0.391385528  | 1.311652477 |
| M15 | X  | 39455000  | 43635000  | 75   | 0.678455199  | 1.600425143 |
| M15 | X  | 43805000  | 62655000  | 234  | 0.993065231  | 1.990409437 |
| M15 | X  | 62825000  | 83395000  | 364  | 0.516009405  | 1.429994308 |
| M15 | X  | 83565000  | 112595000 | 478  | 0.447687003  | 1.363851911 |
| M15 | X  | 112705000 | 141045000 | 505  | 0.599384981  | 1.515070557 |
| M15 | X  | 141195000 | 142465000 | 25   | -0.098971925 | 0.933698115 |
| M15 | X  | 142635000 | 145845000 | 58   | 0.500688598  | 1.414888728 |
| M15 | X  | 145955000 | 149755000 | 65   | 0.919180098  | 1.891040286 |
| M15 | X  | 149975000 | 152595000 | 42   | 0.468007172  | 1.383197505 |
| M23 | 1  | 1305000   | 47715000  | 750  | 0.037002269  | 1.025979759 |
| M23 | 1  | 48135000  | 60235000  | 210  | -0.040643666 | 0.972221089 |
| M23 | 1  | 60255000  | 245345000 | 2701 | 0.017047309  | 1.011886382 |
| M23 | 1  | 245405000 | 248885000 | 53   | -0.110955534 | 0.925974562 |
| M23 | 2  | 105000    | 15875000  | 286  | -0.086624763 | 0.941723369 |
| M23 | 2  | 15955000  | 74905000  | 1043 | 0.003484111  | 1.00241792  |
| M23 | 2  | 74915000  | 155915000 | 1250 | -0.048863339 | 0.966697665 |
| M23 | 2  | 156185000 | 190095000 | 590  | -0.055482046 | 0.962272866 |
| M23 | 2  | 190105000 | 243045000 | 923  | -0.105639002 | 0.929393202 |
| M23 | 3  | 155000    | 60515000  | 1089 | -0.115915922 | 0.92279627  |
| M23 | 3  | 60655000  | 106285000 | 740  | -0.044761614 | 0.969449992 |
| M23 | 3  | 106455000 | 129445000 | 403  | -0.134241535 | 0.911148724 |
| M23 | 3  | 129475000 | 197765000 | 1186 | -0.001352534 | 0.999062934 |
| M23 | 4  | 205000    | 190795000 | 3184 | -0.125316088 | 0.916803154 |
| M23 | 5  | 265000    | 180635000 | 3057 | -0.110543811 | 0.926238859 |
| M23 | 6  | 455000    | 65895000  | 980  | -0.009808324 | 0.993224446 |
| M23 | 6  | 65905000  | 117445000 | 885  | -0.094067443 | 0.936877649 |
| M23 | 6  | 117765000 | 134675000 | 309  | 0.004145357  | 1.002877475 |
| M23 | 6  | 134675001 | 134944999 | 5    | 0.2513938    | 1.190356573 |
| M23 | 6  | 134945000 | 160085000 | 462  | 0.114233443  | 1.082399774 |
| M23 | 6  | 160095000 | 170895000 | 192  | -0.094510241 | 0.936590143 |
| M23 | 7  | 335000    | 65055000  | 1015 | -0.081190992 | 0.945276968 |
| M23 | 7  | 65455000  | 152655000 | 1435 | -0.028386537 | 0.980516262 |
| M23 | 7  | 152665000 | 159095000 | 110  | -0.083237096 | 0.943937278 |
| M23 | 8  | 175000    | 40695000  | 705  | -0.081034554 | 0.945379473 |
| M23 | 8  | 40785000  | 146285000 | 1737 | 0.033795913  | 1.023702075 |
| M23 | 9  | 355000    | 19355000  | 346  | 0.053369823  | 1.037685905 |
| M23 | 9  | 19365000  | 72255000  | 379  | -0.12075109  | 0.919708711 |
| M23 | 9  | 72265000  | 140905000 | 1204 | -0.007885577 | 0.994549045 |
| M23 | 10 | 125000    | 72145000  | 1145 | -0.022105642 | 0.984794329 |
| M23 | 10 | 72155000  | 90325000  | 301  | -0.055035681 | 0.962570637 |

|     |    |           |           |      |              |             |
|-----|----|-----------|-----------|------|--------------|-------------|
| M23 | 10 | 90335000  | 109265000 | 330  | -0.01107702  | 0.992351395 |
| M23 | 10 | 109275000 | 135355000 | 457  | -0.135361445 | 0.910441708 |
| M23 | 11 | 275000    | 12395000  | 189  | -0.127334337 | 0.915521494 |
| M23 | 11 | 12405000  | 77635000  | 1023 | -0.011171497 | 0.992286412 |
| M23 | 11 | 77805000  | 95935000  | 322  | -0.117940943 | 0.921501908 |
| M23 | 11 | 96105000  | 119085000 | 402  | -0.053141605 | 0.9638352   |
| M23 | 11 | 119255000 | 134895000 | 278  | -0.146555049 | 0.903405092 |
| M23 | 12 | 215000    | 28645000  | 470  | -0.003583035 | 0.997519511 |
| M23 | 12 | 28815000  | 133785000 | 1764 | -0.115238352 | 0.923229768 |
| M23 | 13 | 19305000  | 53535000  | 594  | -0.070502575 | 0.952306196 |
| M23 | 13 | 53605000  | 83645000  | 485  | -0.005197204 | 0.996404054 |
| M23 | 13 | 83655000  | 96665000  | 216  | -0.115149109 | 0.92328688  |
| M23 | 13 | 96705000  | 115015000 | 327  | 0.067943839  | 1.04822167  |
| M23 | 14 | 20485000  | 38585000  | 308  | -0.022156418 | 0.984759669 |
| M23 | 14 | 38805000  | 107205000 | 1193 | -0.112214948 | 0.925166577 |
| M23 | 15 | 22825000  | 97875000  | 1262 | 0.002013233  | 1.001396441 |
| M23 | 15 | 98005000  | 102365000 | 81   | -0.093351535 | 0.93734267  |
| M23 | 16 | 105000    | 11775000  | 186  | -0.075611522 | 0.948939804 |
| M23 | 16 | 11945000  | 75835000  | 835  | -0.036570483 | 0.974969854 |
| M23 | 16 | 76005000  | 89905000  | 238  | -0.066184023 | 0.955161093 |
| M23 | 17 | 25000     | 81025000  | 1210 | 0.006494931  | 1.004512092 |
| M23 | 18 | 245000    | 29715000  | 461  | -0.015941676 | 0.989010898 |
| M23 | 18 | 29805000  | 77955000  | 848  | -0.114637687 | 0.923614234 |
| M23 | 19 | 375000    | 50495000  | 691  | 0.010472593  | 1.007285459 |
| M23 | 19 | 50705000  | 58965000  | 112  | -0.071423312 | 0.951698623 |
| M23 | 20 | 185000    | 41855000  | 693  | -0.096994187 | 0.934978965 |
| M23 | 20 | 42005000  | 62865000  | 356  | 0.035768834  | 1.025102971 |
| M23 | 21 | 14685000  | 48095000  | 575  | -0.023971293 | 0.983521644 |
| M23 | 22 | 16945000  | 50955000  | 541  | -0.022178818 | 0.984744379 |
| M23 | X  | 2725000   | 11285000  | 160  | -0.149784531 | 0.901385076 |
| M23 | X  | 11455000  | 152595000 | 2368 | 0.02094515   | 1.01462397  |
| M1  | 1  | 1305000   | 29355000  | 438  | 0.041605572  | 1.029258649 |
| M1  | 1  | 29575000  | 120395000 | 1549 | -0.375842698 | 0.770655131 |
| M1  | 1  | 121195000 | 248175000 | 1727 | 0.363302477  | 1.286367156 |
| M1  | 2  | 45000     | 8475000   | 150  | -0.274361132 | 0.826816376 |
| M1  | 2  | 8485000   | 75915000  | 1200 | -0.113394749 | 0.924410307 |
| M1  | 2  | 75955000  | 84485000  | 137  | -0.294773502 | 0.815200306 |
| M1  | 2  | 84655000  | 100655000 | 150  | -0.0587376   | 0.960103871 |
| M1  | 2  | 100705000 | 120005000 | 320  | -0.245483941 | 0.843532792 |
| M1  | 2  | 120015000 | 124175000 | 72   | -0.118254514 | 0.92130164  |
| M1  | 2  | 124355000 | 133195000 | 141  | -0.266521038 | 0.831321807 |
| M1  | 2  | 133235000 | 239095000 | 1854 | -0.105574234 | 0.929434927 |
| M1  | 2  | 239265000 | 242945000 | 61   | -0.275375488 | 0.826235247 |
| M1  | 3  | 105000    | 197695000 | 3425 | -0.005037019 | 0.996514692 |
| M1  | 4  | 155000    | 190735000 | 3184 | -0.024203274 | 0.98336351  |
| M1  | 5  | 155000    | 7035000   | 123  | -0.258219876 | 0.83611896  |
| M1  | 5  | 7155000   | 180695000 | 2935 | -0.004919896 | 0.996595596 |
| M1  | 6  | 445000    | 63865000  | 942  | 0.031084323  | 1.021779802 |

|    |    |           |           |      |              |             |
|----|----|-----------|-----------|------|--------------|-------------|
| M1 | 6  | 64005000  | 70095000  | 95   | -0.858725484 | 0.551439499 |
| M1 | 6  | 70205000  | 71645000  | 27   | 0.052132747  | 1.036796495 |
| M1 | 6  | 71745000  | 81065000  | 169  | -0.656804751 | 0.634281535 |
| M1 | 6  | 81255000  | 84415000  | 56   | 0.07230535   | 1.051395416 |
| M1 | 6  | 84585000  | 88535000  | 70   | -1.01343799  | 0.49536437  |
| M1 | 6  | 88545000  | 90445000  | 32   | -0.119543336 | 0.920478968 |
| M1 | 6  | 90725000  | 94645000  | 62   | -0.767099868 | 0.587597488 |
| M1 | 6  | 94815000  | 123975000 | 514  | -0.397067323 | 0.759400407 |
| M1 | 6  | 124195000 | 144645000 | 374  | 0.581175922  | 1.496068178 |
| M1 | 6  | 144815000 | 170895000 | 472  | -0.425283253 | 0.744692507 |
| M1 | 7  | 325000    | 153405000 | 2469 | -0.013993577 | 0.990347281 |
| M1 | 7  | 153575000 | 158995000 | 91   | -0.148652577 | 0.90209259  |
| M1 | 8  | 155000    | 36945000  | 639  | -1.02281564  | 0.492154899 |
| M1 | 8  | 36955000  | 146205000 | 1803 | 1.598114468  | 3.027473785 |
| M1 | 9  | 205000    | 140925000 | 1933 | -0.009984386 | 0.993103244 |
| M1 | 10 | 145000    | 127665000 | 2114 | -0.397234526 | 0.7593124   |
| M1 | 10 | 127835000 | 135305000 | 113  | -0.701877027 | 0.614771834 |
| M1 | 11 | 225000    | 8595000   | 123  | -0.210297519 | 0.864358961 |
| M1 | 11 | 8605000   | 55735000  | 734  | -0.042110131 | 0.971233351 |
| M1 | 11 | 56005000  | 56645000  | 10   | 0.607069772  | 1.523162402 |
| M1 | 11 | 56755000  | 66255000  | 164  | -0.839143324 | 0.558975392 |
| M1 | 11 | 66425000  | 70845000  | 66   | 2.075058476  | 4.213614929 |
| M1 | 11 | 70865000  | 134925000 | 1121 | -0.990809123 | 0.503195483 |
| M1 | 12 | 305000    | 120275000 | 2007 | 0.03610847   | 1.025344326 |
| M1 | 12 | 120305000 | 125475000 | 86   | 0.213976957  | 1.159881128 |
| M1 | 12 | 125645000 | 132345000 | 127  | -0.330345697 | 0.795345881 |
| M1 | 12 | 132445000 | 133785000 | 11   | -0.041413117 | 0.9717027   |
| M1 | 13 | 19255000  | 107545000 | 1501 | -0.417395898 | 0.748774963 |
| M1 | 13 | 107635000 | 114965000 | 121  | -0.565516144 | 0.675713627 |
| M1 | 14 | 19135000  | 107075000 | 1504 | 0.014728287  | 1.010261159 |
| M1 | 15 | 20055000  | 102355000 | 1347 | -0.003878219 | 0.997315433 |
| M1 | 16 | 155000    | 25245000  | 390  | 0.538591599  | 1.452553799 |
| M1 | 16 | 25465000  | 28025000  | 51   | -0.21287034  | 0.862818886 |
| M1 | 16 | 28195000  | 31085000  | 27   | 0.550708426  | 1.464804803 |
| M1 | 16 | 31305000  | 52045000  | 129  | 0.678503269  | 1.60047847  |
| M1 | 16 | 52055000  | 90075000  | 662  | 0.010896714  | 1.007581623 |
| M1 | 17 | 55000     | 26615000  | 378  | -0.896519795 | 0.537181008 |
| M1 | 17 | 26835000  | 31245000  | 60   | 0.169071465  | 1.124334617 |
| M1 | 17 | 31385000  | 35445000  | 64   | -0.856536528 | 0.552276816 |
| M1 | 17 | 35625000  | 39625000  | 39   | 0.19190291   | 1.142269372 |
| M1 | 17 | 39995000  | 41545000  | 19   | -0.800960336 | 0.573966987 |
| M1 | 17 | 41715000  | 81025000  | 634  | 0.038742483  | 1.027218068 |
| M1 | 18 | 195000    | 11215000  | 206  | -0.295232222 | 0.814941146 |
| M1 | 18 | 11385000  | 22045000  | 122  | -0.17208987  | 0.887556047 |
| M1 | 18 | 22115000  | 77995000  | 980  | -0.30864038  | 0.80740231  |
| M1 | 19 | 385000    | 3525000   | 27   | -0.490958833 | 0.711552034 |
| M1 | 19 | 3895000   | 4945000   | 11   | 0.171716618  | 1.126397954 |
| M1 | 19 | 5155000   | 9795000   | 67   | -0.741384125 | 0.598165196 |

|    |    |           |           |      |              |             |
|----|----|-----------|-----------|------|--------------|-------------|
| M1 | 19 | 10015000  | 59085000  | 695  | 0.021857543  | 1.015265845 |
| M1 | 20 | 305000    | 53025000  | 898  | 0.274001055  | 1.20915656  |
| M1 | 20 | 53035000  | 62875000  | 153  | 0.108084948  | 1.077796606 |
| M1 | 21 | 14695000  | 47965000  | 572  | 0.047178214  | 1.033242014 |
| M1 | 22 | 16935000  | 51105000  | 542  | 0.026452344  | 1.018504493 |
| M1 | X  | 2755000   | 23945000  | 392  | -0.967224144 | 0.511489261 |
| M1 | X  | 24205000  | 136155000 | 1845 | -0.468117037 | 0.7229075   |
| M1 | X  | 136205000 | 152635000 | 290  | -0.622145623 | 0.649703948 |
| M2 | 1  | 1305000   | 5695000   | 54   | -0.301230209 | 0.811560071 |
| M2 | 1  | 5975000   | 21195000  | 235  | -0.011788984 | 0.991861795 |
| M2 | 1  | 21205000  | 29585000  | 150  | 0.379857168  | 1.301213024 |
| M2 | 1  | 29765000  | 31145000  | 22   | -0.491351805 | 0.711358243 |
| M2 | 1  | 31215000  | 108145000 | 1325 | 0.003840869  | 1.002665835 |
| M2 | 1  | 108235000 | 239735000 | 1768 | 0.380783797  | 1.302049049 |
| M2 | 1  | 239965000 | 244405000 | 82   | 0.066855122  | 1.047430937 |
| M2 | 1  | 244415000 | 248175000 | 71   | 0.331980795  | 1.258740418 |
| M2 | 2  | 55000     | 7195000   | 126  | 0.230863424  | 1.173537077 |
| M2 | 2  | 7315000   | 14325000  | 130  | -0.408773923 | 0.753263264 |
| M2 | 2  | 14505000  | 97765000  | 1336 | 0.32364387   | 1.25148749  |
| M2 | 2  | 98345000  | 116395000 | 291  | 0.660479558  | 1.580607937 |
| M2 | 2  | 116605000 | 122595000 | 109  | -0.094463016 | 0.936620801 |
| M2 | 2  | 122655000 | 128265000 | 98   | -0.316674075 | 0.802918759 |
| M2 | 2  | 128495000 | 166395000 | 662  | -0.006166852 | 0.995734587 |
| M2 | 2  | 166415000 | 169585000 | 58   | 0.233440454  | 1.175635195 |
| M2 | 2  | 169755000 | 202695000 | 563  | 0.62509122   | 1.542308341 |
| M2 | 2  | 202845000 | 204375000 | 26   | -0.049154274 | 0.966502739 |
| M2 | 2  | 204555000 | 243045000 | 673  | -0.437417458 | 0.738455322 |
| M2 | 3  | 245000    | 15815000  | 279  | 0.389702872  | 1.310123552 |
| M2 | 3  | 15995000  | 98165000  | 1397 | -0.021199471 | 0.985413081 |
| M2 | 3  | 98175000  | 197635000 | 1741 | 0.293935251  | 1.225979836 |
| M2 | 4  | 165000    | 38525000  | 645  | -0.522380238 | 0.696222219 |
| M2 | 4  | 38705000  | 41495000  | 52   | -0.169457239 | 0.889177139 |
| M2 | 4  | 41615000  | 91705000  | 794  | -0.436276428 | 0.739039598 |
| M2 | 4  | 91935000  | 132395000 | 686  | 0.318345669  | 1.246899915 |
| M2 | 4  | 132605000 | 137345000 | 72   | 0.206075087  | 1.153545641 |
| M2 | 4  | 137575000 | 141845000 | 76   | 0.911602023  | 1.88113322  |
| M2 | 4  | 142025000 | 190455000 | 839  | -0.41155618  | 0.751811985 |
| M2 | 5  | 85000     | 45875000  | 789  | 0.559638842  | 1.473900201 |
| M2 | 5  | 49705000  | 129275000 | 1352 | -0.496599091 | 0.708775632 |
| M2 | 5  | 129505000 | 134705000 | 88   | -0.090941866 | 0.93890958  |
| M2 | 5  | 134755000 | 136875000 | 39   | -0.431511607 | 0.741484476 |
| M2 | 5  | 137055000 | 151525000 | 268  | -0.089488633 | 0.939855825 |
| M2 | 5  | 151755000 | 163355000 | 218  | -0.262708703 | 0.833521488 |
| M2 | 5  | 163405000 | 180695000 | 293  | -0.217922052 | 0.85980294  |
| M2 | 6  | 405000    | 37415000  | 559  | 0.608361903  | 1.524527213 |
| M2 | 6  | 37425000  | 57145000  | 333  | 0.322182978  | 1.250220859 |
| M2 | 6  | 57635000  | 68215000  | 115  | 0.157492117  | 1.115346609 |
| M2 | 6  | 68225000  | 122235000 | 945  | 0.297176725  | 1.228737487 |

|    |    |           |           |      |              |             |
|----|----|-----------|-----------|------|--------------|-------------|
| M2 | 6  | 122245000 | 132495000 | 183  | 0.744724158  | 1.675653855 |
| M2 | 6  | 132625000 | 146495000 | 255  | 0.362037723  | 1.285239943 |
| M2 | 6  | 146675000 | 151075000 | 81   | -0.38779022  | 0.764299388 |
| M2 | 6  | 151255000 | 154895000 | 69   | 0.306300329  | 1.236532646 |
| M2 | 6  | 155175000 | 156915000 | 34   | -0.479392964 | 0.717279367 |
| M2 | 6  | 157145000 | 160165000 | 55   | 0.204464189  | 1.152258324 |
| M2 | 6  | 160345000 | 170855000 | 186  | 0.029488247  | 1.020650016 |
| M2 | 7  | 55000     | 7445000   | 104  | -0.283304349 | 0.821706823 |
| M2 | 7  | 7505000   | 25435000  | 315  | 0.284172957  | 1.217711995 |
| M2 | 7  | 25615000  | 70045000  | 685  | -0.061689455 | 0.958141439 |
| M2 | 7  | 70105000  | 85625000  | 228  | -0.382742629 | 0.766978143 |
| M2 | 7  | 85805000  | 133085000 | 804  | 0.001817171  | 1.00126036  |
| M2 | 7  | 133255000 | 144545000 | 178  | 0.360111056  | 1.283524697 |
| M2 | 7  | 144685000 | 148855000 | 73   | -0.16014395  | 0.894935771 |
| M2 | 7  | 148905000 | 158995000 | 164  | -1.186066579 | 0.439499498 |
| M2 | 8  | 155000    | 35395000  | 611  | -0.510145815 | 0.702151467 |
| M2 | 8  | 35405000  | 47095000  | 143  | 0.547605805  | 1.461658017 |
| M2 | 8  | 47575000  | 60555000  | 229  | -0.15412838  | 0.898675154 |
| M2 | 8  | 60785000  | 97035000  | 618  | 0.308814939  | 1.238689795 |
| M2 | 8  | 97215000  | 145245000 | 820  | 0.881459007  | 1.842237427 |
| M2 | 9  | 245000    | 6745000   | 119  | -0.387837981 | 0.764274086 |
| M2 | 9  | 6775000   | 17465000  | 193  | 0.273986349  | 1.209144235 |
| M2 | 9  | 17605000  | 129845000 | 1456 | -0.04710729  | 0.967875045 |
| M2 | 9  | 130025000 | 140895000 | 157  | -0.378555696 | 0.769207271 |
| M2 | 10 | 115000    | 135445000 | 2235 | -0.452211302 | 0.730921663 |
| M2 | 11 | 215000    | 61925000  | 966  | -0.092581927 | 0.937842831 |
| M2 | 11 | 62155000  | 78285000  | 257  | 0.297513586  | 1.229024424 |
| M2 | 11 | 78515000  | 130935000 | 924  | -0.026698579 | 0.981664141 |
| M2 | 11 | 130945000 | 134815000 | 69   | -0.487162734 | 0.713426775 |
| M2 | 12 | 245000    | 33175000  | 545  | 0.35973464   | 1.283189855 |
| M2 | 12 | 33455000  | 46015000  | 155  | 0.012660708  | 1.008814354 |
| M2 | 12 | 46345000  | 54045000  | 127  | 0.189253471  | 1.140173575 |
| M2 | 12 | 54325000  | 104135000 | 864  | -0.017590589 | 0.987881164 |
| M2 | 12 | 104315000 | 125565000 | 390  | 0.299054846  | 1.230338117 |
| M2 | 12 | 125575000 | 133785000 | 142  | -0.121742327 | 0.919077021 |
| M2 | 13 | 19365000  | 31445000  | 212  | 0.190655566  | 1.141282201 |
| M2 | 13 | 31495000  | 65195000  | 564  | -0.610456858 | 0.654989254 |
| M2 | 13 | 65305000  | 106945000 | 708  | 0.124885266  | 1.090421011 |
| M2 | 13 | 107125000 | 115035000 | 134  | 0.784468541  | 1.722457685 |
| M2 | 14 | 20515000  | 24885000  | 74   | 0.305574191  | 1.23591043  |
| M2 | 14 | 25065000  | 30815000  | 100  | 0.096124032  | 1.068897883 |
| M2 | 14 | 30825000  | 38545000  | 130  | 0.31948213   | 1.247882528 |
| M2 | 14 | 38555000  | 107095000 | 1196 | -0.461761733 | 0.726099048 |
| M2 | 15 | 20075000  | 23795000  | 12   | 0.13564481   | 1.098583714 |
| M2 | 15 | 23955000  | 27135000  | 56   | -0.382868985 | 0.766910972 |
| M2 | 15 | 27315000  | 102355000 | 1273 | -0.026777124 | 0.981610697 |
| M2 | 16 | 155000    | 4975000   | 59   | 0.46206525   | 1.377512346 |
| M2 | 16 | 5155000   | 13645000  | 157  | 0.117274643  | 1.084683878 |



|    |    |           |           |      |              |             |
|----|----|-----------|-----------|------|--------------|-------------|
| M2 | 16 | 13825000  | 17045000  | 38   | 0.378749413  | 1.300214288 |
| M2 | 16 | 17055000  | 52395000  | 353  | 0.146705055  | 1.107038238 |
| M2 | 16 | 52575000  | 75495000  | 401  | 0.284901228  | 1.21832685  |
| M2 | 16 | 75655000  | 90035000  | 248  | 0.141104111  | 1.102748739 |
| M2 | 17 | 65000     | 2585000   | 38   | -0.207486835 | 0.866044562 |
| M2 | 17 | 2655000   | 15535000  | 232  | -0.493053805 | 0.710519522 |
| M2 | 17 | 15545000  | 31195000  | 170  | -0.331999332 | 0.794434768 |
| M2 | 17 | 31375000  | 35635000  | 68   | -0.603102718 | 0.658336587 |
| M2 | 17 | 35865000  | 54665000  | 259  | -0.216202557 | 0.860828318 |
| M2 | 17 | 54895000  | 81065000  | 431  | 0.27478932   | 1.209817404 |
| M2 | 18 | 55000     | 34235000  | 544  | 0.265019595  | 1.20165237  |
| M2 | 18 | 34245000  | 45145000  | 196  | 0.095765616  | 1.068632364 |
| M2 | 18 | 45405000  | 60485000  | 274  | 0.213637883  | 1.159608556 |
| M2 | 18 | 60655000  | 77875000  | 295  | -0.582093763 | 0.667993624 |
| M2 | 19 | 355000    | 21645000  | 299  | 0.631713613  | 1.549404261 |
| M2 | 19 | 21825000  | 24185000  | 31   | -0.051130896 | 0.96517945  |
| M2 | 19 | 28215000  | 31595000  | 63   | -0.871917931 | 0.546419952 |
| M2 | 19 | 31805000  | 59025000  | 406  | -0.386899356 | 0.764771489 |
| M2 | 20 | 255000    | 2455000   | 41   | -0.177564502 | 0.884194398 |
| M2 | 20 | 2635000   | 31925000  | 468  | 0.119893255  | 1.086654458 |
| M2 | 20 | 32155000  | 62835000  | 535  | 0.709756005  | 1.635527486 |
| M2 | 21 | 14405000  | 16335000  | 27   | 0.04673212   | 1.032922576 |
| M2 | 21 | 16345000  | 47995000  | 549  | 0.265806418  | 1.202307911 |
| M2 | 22 | 16905000  | 37635000  | 333  | -0.030977637 | 0.978756822 |
| M2 | 22 | 37965000  | 43575000  | 93   | 0.184301403  | 1.136266625 |
| M2 | 22 | 43905000  | 47835000  | 66   | -0.151822466 | 0.900112688 |
| M2 | 22 | 48005000  | 51135000  | 43   | -0.377995262 | 0.769506137 |
| M2 | X  | 2815000   | 51255000  | 857  | -0.487374153 | 0.713322234 |
| M2 | X  | 51355000  | 152585000 | 1670 | 0.085323659  | 1.060925726 |
| M5 | 1  | 1305000   | 60465000  | 968  | -0.007628898 | 0.994726008 |
| M5 | 1  | 60635000  | 121275000 | 1021 | -0.237637511 | 0.848133038 |
| M5 | 1  | 145195000 | 249195000 | 1724 | 0.843061146  | 1.793852347 |
| M5 | 2  | 55000     | 243045000 | 4098 | 0.002333061  | 1.001618463 |
| M5 | 3  | 105000    | 162365000 | 2828 | 0.233170935  | 1.175415587 |
| M5 | 3  | 162735000 | 197785000 | 594  | 0.696727796  | 1.620824398 |
| M5 | 4  | 105000    | 190745000 | 3185 | -0.014236028 | 0.990180863 |
| M5 | 5  | 155000    | 6255000   | 107  | -0.019053552 | 0.986879913 |
| M5 | 5  | 6265000   | 163835000 | 2669 | 0.253957653  | 1.192473869 |
| M5 | 5  | 163845000 | 168825000 | 91   | 0.044546952  | 1.031359252 |
| M5 | 5  | 168855000 | 180595000 | 191  | 0.201735944  | 1.150081375 |
| M5 | 6  | 405000    | 3545000   | 58   | 0.302044289  | 1.232890173 |
| M5 | 6  | 3605000   | 8125000   | 82   | 0.103873341  | 1.074654822 |
| M5 | 6  | 8135000   | 35885000  | 392  | 0.276879764  | 1.211571683 |
| M5 | 6  | 35895000  | 170755000 | 2301 | 0.023516059  | 1.016433661 |
| M5 | 7  | 75000     | 47935000  | 827  | 0.235581022  | 1.177380813 |
| M5 | 7  | 48105000  | 72735000  | 323  | -0.021728614 | 0.985051724 |
| M5 | 7  | 72755000  | 144445000 | 1169 | 0.241092881  | 1.181887635 |
| M5 | 7  | 144495000 | 158995000 | 242  | 0.068507548  | 1.048631325 |

|    |    |           |           |      |              |             |
|----|----|-----------|-----------|------|--------------|-------------|
| M5 | 8  | 215000    | 146255000 | 2442 | -0.02317482  | 0.98406477  |
| M5 | 9  | 305000    | 140995000 | 1932 | -0.020163161 | 0.986121173 |
| M5 | 10 | 255000    | 135375000 | 2232 | -0.024002883 | 0.983500109 |
| M5 | 11 | 205000    | 91945000  | 1465 | 0.228637894  | 1.171728151 |
| M5 | 11 | 92065000  | 126435000 | 604  | -0.294473081 | 0.815370077 |
| M5 | 11 | 126445000 | 134735000 | 150  | -0.447684984 | 0.733218461 |
| M5 | 12 | 205000    | 125615000 | 2096 | 0.242340093  | 1.18290982  |
| M5 | 12 | 125755000 | 133785000 | 138  | -0.105313893 | 0.929602663 |
| M5 | 13 | 19305000  | 28085000  | 153  | -0.247613995 | 0.842288285 |
| M5 | 13 | 28095000  | 115065000 | 1472 | -0.164452566 | 0.892267028 |
| M5 | 14 | 20535000  | 107075000 | 1502 | -0.002282382 | 0.998419224 |
| M5 | 15 | 20095000  | 35035000  | 184  | 0.029557566  | 1.020699058 |
| M5 | 15 | 35405000  | 79245000  | 755  | 0.287212535  | 1.220280267 |
| M5 | 15 | 79355000  | 95235000  | 271  | 0.156885864  | 1.114878013 |
| M5 | 15 | 95405000  | 101935000 | 121  | 0.884714763  | 1.846399531 |
| M5 | 16 | 105000    | 4925000   | 59   | 0.200253946  | 1.148900569 |
| M5 | 16 | 4935000   | 90025000  | 1209 | 0.087039347  | 1.062188156 |
| M5 | 17 | 5000      | 17495000  | 299  | -0.210029117 | 0.864519783 |
| M5 | 17 | 17655000  | 32675000  | 169  | 0.374779662  | 1.296641507 |
| M5 | 17 | 32895000  | 81035000  | 736  | 0.493423013  | 1.40778109  |
| M5 | 18 | 205000    | 7575000   | 135  | 0.043890421  | 1.030890015 |
| M5 | 18 | 7745000   | 25695000  | 257  | 0.166821496  | 1.122582517 |
| M5 | 18 | 25745000  | 77845000  | 915  | 0.102608807  | 1.07371329  |
| M5 | 19 | 255000    | 59095000  | 811  | 0.0902645    | 1.064565339 |
| M5 | 20 | 165000    | 21515000  | 396  | 0.218670658  | 1.163660861 |
| M5 | 20 | 21525000  | 30045000  | 88   | 0.038710275  | 1.027195135 |
| M5 | 20 | 30095000  | 50145000  | 361  | 0.23485441   | 1.176787975 |
| M5 | 20 | 50155000  | 62755000  | 205  | 0.09628744   | 1.06901896  |
| M5 | 21 | 14425000  | 47955000  | 575  | -0.31541874  | 0.803617708 |
| M5 | 22 | 16925000  | 51155000  | 544  | -0.289523532 | 0.818172225 |
| M5 | X  | 2825000   | 152695000 | 2531 | 0.270551504  | 1.206268865 |
| M3 | 1  | 1305000   | 143295000 | 1995 | 0.015911887  | 1.011090326 |
| M3 | 1  | 145435000 | 248885000 | 1722 | 0.724202687  | 1.651987404 |
| M3 | 2  | 105000    | 4245000   | 73   | -0.485150652 | 0.714422463 |
| M3 | 2  | 4285000   | 11015000  | 122  | 0.880201276  | 1.840632077 |
| M3 | 2  | 11235000  | 17045000  | 106  | -0.423877062 | 0.745418711 |
| M3 | 2  | 17105000  | 44235000  | 483  | -0.038689218 | 0.973539069 |
| M3 | 2  | 44245000  | 46975000  | 51   | 0.271787516  | 1.207302763 |
| M3 | 2  | 47145000  | 49585000  | 47   | 0.574743753  | 1.489412895 |
| M3 | 2  | 49705000  | 64005000  | 250  | 0.378402101  | 1.299901314 |
| M3 | 2  | 64175000  | 189235000 | 2019 | 0.009622653  | 1.006692208 |
| M3 | 2  | 189455000 | 242935000 | 928  | 0.139323771  | 1.101388745 |
| M3 | 3  | 105000    | 94365000  | 1623 | 0.307772012  | 1.237794667 |
| M3 | 3  | 94605000  | 145375000 | 897  | 0.100208256  | 1.071928186 |
| M3 | 3  | 145595000 | 179925000 | 594  | 0.333037045  | 1.259662325 |
| M3 | 3  | 180095000 | 197765000 | 302  | 0.471153698  | 1.386217559 |
| M3 | 4  | 235000    | 48735000  | 823  | -0.059235131 | 0.959772824 |
| M3 | 4  | 48755000  | 72395000  | 330  | 0.177210954  | 1.130695888 |

|    |    |           |           |      |              |             |
|----|----|-----------|-----------|------|--------------|-------------|
| M3 | 4  | 72565000  | 79015000  | 114  | 0.255600924  | 1.193832905 |
| M3 | 4  | 79105000  | 190455000 | 1908 | -0.024874865 | 0.982905849 |
| M3 | 5  | 55000     | 7695000   | 138  | 0.074733548  | 1.053166508 |
| M3 | 5  | 7915000   | 36815000  | 490  | 0.158618778  | 1.11621797  |
| M3 | 5  | 37105000  | 126985000 | 1469 | -0.111657598 | 0.925524061 |
| M3 | 5  | 126995000 | 159095000 | 584  | -0.146090382 | 0.90369611  |
| M3 | 5  | 159155000 | 180665000 | 373  | 0.620307051  | 1.537202312 |
| M3 | 6  | 485000    | 111875000 | 1762 | 0.32719642   | 1.254573    |
| M3 | 6  | 112045000 | 170735000 | 1067 | 0.038495167  | 1.02704199  |
| M3 | 7  | 55000     | 95165000  | 1500 | -0.015998846 | 0.988971707 |
| M3 | 7  | 95335000  | 107295000 | 201  | 0.149458586  | 1.109153152 |
| M3 | 7  | 107495000 | 159035000 | 859  | 0.068610408  | 1.048706092 |
| M3 | 8  | 255000    | 33275000  | 570  | -0.14038176  | 0.907279043 |
| M3 | 8  | 33445000  | 41625000  | 148  | 0.28977659   | 1.222450959 |
| M3 | 8  | 41795000  | 146235000 | 1717 | 0.804369868  | 1.74638285  |
| M3 | 9  | 205000    | 4705000   | 83   | -0.689732656 | 0.619968725 |
| M3 | 9  | 4715000   | 15925000  | 204  | 0.164913407  | 1.121098786 |
| M3 | 9  | 16095000  | 31135000  | 272  | -0.365293848 | 0.77631074  |
| M3 | 9  | 31355000  | 38655000  | 133  | -0.050825568 | 0.965383739 |
| M3 | 9  | 44875000  | 81735000  | 196  | -0.385679931 | 0.765418178 |
| M3 | 9  | 81905000  | 99345000  | 310  | 0.18983223   | 1.140631065 |
| M3 | 9  | 99515000  | 140985000 | 721  | -0.042013649 | 0.971298306 |
| M3 | 10 | 255000    | 4615000   | 86   | 0.606977437  | 1.52306492  |
| M3 | 10 | 4655000   | 7885000   | 62   | 0.24282106   | 1.183304245 |
| M3 | 10 | 8105000   | 23765000  | 274  | -0.028988327 | 0.980107346 |
| M3 | 10 | 23935000  | 26145000  | 40   | -0.488852711 | 0.712591554 |
| M3 | 10 | 26305000  | 28095000  | 34   | -0.123997827 | 0.917641264 |
| M3 | 10 | 28255000  | 38595000  | 195  | 1.097270331  | 2.139495035 |
| M3 | 10 | 42765000  | 135445000 | 1525 | 0.225767116  | 1.169398881 |
| M3 | 11 | 255000    | 67445000  | 1054 | 0.210042522  | 1.156722277 |
| M3 | 11 | 67855000  | 75715000  | 126  | 1.194433079  | 2.288548837 |
| M3 | 11 | 76035000  | 81375000  | 95   | 0.801832361  | 1.743313896 |
| M3 | 11 | 81545000  | 130975000 | 868  | -0.026972885 | 0.98147751  |
| M3 | 11 | 131145000 | 134915000 | 67   | -0.143789743 | 0.905138367 |
| M3 | 12 | 305000    | 9385000   | 148  | 0.968872886  | 1.957310836 |
| M3 | 12 | 9855000   | 16945000  | 118  | -0.026777588 | 0.981610381 |
| M3 | 12 | 16945001  | 17714999  | 12   | 1.039398493  | 2.055370523 |
| M3 | 12 | 17715000  | 19945000  | 39   | 0.985547723  | 1.980064907 |
| M3 | 12 | 20105000  | 54685000  | 520  | -0.041563851 | 0.971601181 |
| M3 | 12 | 54905000  | 106775000 | 907  | 0.189164092  | 1.14010294  |
| M3 | 12 | 106945000 | 119185000 | 231  | -0.186353693 | 0.878824081 |
| M3 | 12 | 119305000 | 133775000 | 247  | 0.127923413  | 1.09271973  |
| M3 | 13 | 19295000  | 115095000 | 1626 | 0.275021506  | 1.210012127 |
| M3 | 14 | 20565000  | 107235000 | 1504 | 0.010315292  | 1.007175638 |
| M3 | 15 | 22805000  | 40165000  | 271  | -0.148536365 | 0.902165258 |
| M3 | 15 | 40435000  | 51695000  | 189  | -0.360138694 | 0.779089678 |
| M3 | 15 | 51755000  | 102295000 | 879  | 0.026658832  | 1.018650278 |
| M3 | 16 | 385000    | 4125000   | 44   | -0.218273182 | 0.859593702 |

|    |    |           |           |      |              |             |
|----|----|-----------|-----------|------|--------------|-------------|
| M3 | 16 | 4495000   | 8895000   | 80   | 0.910089151  | 1.879161617 |
| M3 | 16 | 8905000   | 13255000  | 80   | 0.114029233  | 1.082246574 |
| M3 | 16 | 13265000  | 77635000  | 846  | 0.149240693  | 1.108985646 |
| M3 | 16 | 77645000  | 90095000  | 211  | 0.089731072  | 1.064171795 |
| M3 | 17 | 45000     | 65405000  | 948  | -0.026196874 | 0.982005579 |
| M3 | 17 | 65415000  | 81085000  | 262  | 0.309762686  | 1.239503793 |
| M3 | 18 | 55000     | 4655000   | 80   | 0.256285414  | 1.194399456 |
| M3 | 18 | 4755000   | 11335000  | 129  | -0.316177564 | 0.803195135 |
| M3 | 18 | 11505000  | 77845000  | 1099 | -0.078541678 | 0.947014435 |
| M3 | 19 | 315000    | 59045000  | 809  | -0.047001272 | 0.967946173 |
| M3 | 20 | 265000    | 62895000  | 1052 | 0.222836977  | 1.167026222 |
| M3 | 21 | 14655000  | 47975000  | 574  | 0.131398338  | 1.095354864 |
| M3 | 22 | 16945000  | 43895000  | 431  | 0.158484817  | 1.116114329 |
| M3 | 22 | 44025000  | 50955000  | 108  | 0.059929992  | 1.042415175 |
| M3 | X  | 2725000   | 52595000  | 871  | -0.474017615 | 0.719956869 |
| M3 | X  | 53065000  | 77195000  | 356  | -0.16144562  | 0.89412868  |
| M3 | X  | 77205000  | 110665000 | 555  | -0.127036087 | 0.915710781 |
| M3 | X  | 110835000 | 152605000 | 742  | -0.135379715 | 0.910430178 |
| M6 | 1  | 1305000   | 8385000   | 94   | 0.048413876  | 1.034127361 |
| M6 | 1  | 8395000   | 14095000  | 82   | 0.324436623  | 1.252175365 |
| M6 | 1  | 14175000  | 39235000  | 425  | -0.128970604 | 0.914483723 |
| M6 | 1  | 39405000  | 46385000  | 124  | 0.278990953  | 1.213345952 |
| M6 | 1  | 46455000  | 51305000  | 77   | 0.069761281  | 1.049543004 |
| M6 | 1  | 51355000  | 54415000  | 48   | 0.29315708   | 1.225318736 |
| M6 | 1  | 54595000  | 84505000  | 541  | 0.100755872  | 1.072335145 |
| M6 | 1  | 84785000  | 95495000  | 193  | 0.222798928  | 1.166995443 |
| M6 | 1  | 95605000  | 107765000 | 185  | 0.084739073  | 1.060495922 |
| M6 | 1  | 107945000 | 157035000 | 358  | 0.228991106  | 1.172015058 |
| M6 | 1  | 157265000 | 159295000 | 34   | 0.013204291  | 1.009194529 |
| M6 | 1  | 159305000 | 208125000 | 809  | 0.595672768  | 1.511177125 |
| M6 | 1  | 208155000 | 213315000 | 97   | 0.371249976  | 1.293473032 |
| M6 | 1  | 213495000 | 248885000 | 625  | 0.039002333  | 1.027403101 |
| M6 | 2  | 5000      | 24125000  | 432  | 0.03570122   | 1.025054928 |
| M6 | 2  | 24255000  | 75245000  | 906  | 0.218090412  | 1.163192936 |
| M6 | 2  | 75425000  | 242905000 | 2754 | -0.056773591 | 0.961411795 |
| M6 | 3  | 135000    | 5135000   | 98   | 0.604473454  | 1.520423737 |
| M6 | 3  | 5145000   | 41535000  | 656  | 0.404448121  | 1.323582499 |
| M6 | 3  | 41545000  | 53365000  | 197  | 0.445960591  | 1.362220823 |
| M6 | 3  | 53545000  | 84085000  | 558  | -0.09872131  | 0.933860324 |
| M6 | 3  | 84315000  | 119525000 | 553  | 0.347678804  | 1.272511596 |
| M6 | 3  | 119755000 | 125535000 | 102  | 0.67679467   | 1.598584128 |
| M6 | 3  | 125545000 | 158295000 | 573  | 0.359902869  | 1.283339493 |
| M6 | 3  | 158475000 | 193395000 | 610  | 0.267187908  | 1.203459764 |
| M6 | 3  | 193395001 | 193924999 | 9    | 1.848276212  | 3.600697027 |
| M6 | 3  | 193925000 | 196665000 | 37   | 1.379262639  | 2.601353821 |
| M6 | 4  | 145000    | 19985000  | 324  | 0.268722383  | 1.204740465 |
| M6 | 4  | 20215000  | 25315000  | 97   | 0.097543174  | 1.069949847 |
| M6 | 4  | 25495000  | 48945000  | 401  | 0.357429611  | 1.281141307 |

|    |    |           |           |      |              |             |
|----|----|-----------|-----------|------|--------------|-------------|
| M6 | 4  | 52765000  | 54145000  | 27   | -0.435407987 | 0.739484603 |
| M6 | 4  | 54305000  | 56235000  | 33   | 0.758850028  | 1.692141281 |
| M6 | 4  | 56465000  | 73395000  | 275  | -0.511876082 | 0.70130986  |
| M6 | 4  | 73625000  | 79375000  | 104  | 1.174999893  | 2.257928642 |
| M6 | 4  | 79555000  | 83165000  | 63   | -0.453554201 | 0.730241619 |
| M6 | 4  | 83175000  | 95045000  | 205  | -0.29035706  | 0.817699657 |
| M6 | 4  | 95275000  | 108545000 | 231  | 0.251661512  | 1.190577481 |
| M6 | 4  | 108665000 | 118055000 | 155  | 0.106577116  | 1.076670735 |
| M6 | 4  | 118385000 | 131735000 | 229  | 0.196985883  | 1.146300969 |
| M6 | 4  | 131745000 | 138165000 | 99   | 0.04519983   | 1.031826089 |
| M6 | 4  | 138175000 | 163115000 | 444  | 0.210897956  | 1.157408349 |
| M6 | 4  | 163125000 | 190475000 | 465  | 0.10682513   | 1.076855842 |
| M6 | 5  | 105000    | 180645000 | 3060 | 0.331549832  | 1.258364461 |
| M6 | 6  | 205000    | 170875000 | 2838 | -0.054185035 | 0.963138357 |
| M6 | 7  | 105000    | 47975000  | 827  | 0.260026644  | 1.19750082  |
| M6 | 7  | 48155000  | 159095000 | 1736 | -0.070396461 | 0.952376244 |
| M6 | 8  | 375000    | 28565000  | 482  | -0.480263451 | 0.716846708 |
| M6 | 8  | 28575000  | 33845000  | 97   | 0.120083023  | 1.086797403 |
| M6 | 8  | 33935000  | 37365000  | 63   | 0.546235971  | 1.460270837 |
| M6 | 8  | 37545000  | 52065000  | 183  | 1.199746762  | 2.29699348  |
| M6 | 8  | 52245000  | 57385000  | 89   | 0.54176767   | 1.455755097 |
| M6 | 8  | 57395000  | 62245000  | 88   | 0.860049436  | 1.815100507 |
| M6 | 8  | 62355000  | 145845000 | 1419 | 1.563811526  | 2.95633862  |
| M6 | 9  | 325000    | 32375000  | 583  | -0.426264777 | 0.744186035 |
| M6 | 9  | 32385000  | 36735000  | 77   | -0.307807879 | 0.807868353 |
| M6 | 9  | 36755000  | 140935000 | 1271 | 0.360694495  | 1.284043871 |
| M6 | 10 | 165000    | 26835000  | 485  | 0.107740957  | 1.07753965  |
| M6 | 10 | 26845000  | 35455000  | 161  | 0.216190657  | 1.161662239 |
| M6 | 10 | 35555000  | 70355000  | 472  | 0.071088601  | 1.050509058 |
| M6 | 10 | 70685000  | 77905000  | 112  | 0.271088831  | 1.206718218 |
| M6 | 10 | 77915000  | 135445000 | 998  | 0.077951488  | 1.055518224 |
| M6 | 11 | 625000    | 50215000  | 841  | 0.087369616  | 1.062431345 |
| M6 | 11 | 51455000  | 62605000  | 131  | 0.614342212  | 1.530859852 |
| M6 | 11 | 62855000  | 66065000  | 51   | 0.560256144  | 1.474530991 |
| M6 | 11 | 66245000  | 71195000  | 74   | 1.2941228    | 2.452278446 |
| M6 | 11 | 71305000  | 87605000  | 288  | 0.005300729  | 1.003680943 |
| M6 | 11 | 87755000  | 91595000  | 60   | 1.34008916   | 2.531669642 |
| M6 | 11 | 91775000  | 129985000 | 675  | 0.041160077  | 1.028940869 |
| M6 | 11 | 130215000 | 134945000 | 86   | -0.313017718 | 0.804956252 |
| M6 | 12 | 355000    | 3295000   | 47   | 0.32804974   | 1.25531527  |
| M6 | 12 | 3585000   | 6115000   | 47   | 0.052180301  | 1.036830671 |
| M6 | 12 | 6205000   | 42365000  | 536  | 0.305992909  | 1.236269185 |
| M6 | 12 | 42455000  | 114905000 | 1267 | 0.614093577  | 1.530596045 |
| M6 | 12 | 115085000 | 122695000 | 137  | -0.0548093   | 0.96272169  |
| M6 | 12 | 122905000 | 133795000 | 187  | 0.400129717  | 1.319626557 |
| M6 | 13 | 19325000  | 89485000  | 1170 | -0.13934758  | 0.907929649 |
| M6 | 13 | 89495000  | 115035000 | 455  | -0.261728404 | 0.834088051 |
| M6 | 14 | 20515000  | 25165000  | 79   | 0.365857176  | 1.288647051 |

|    |    |           |           |      |              |             |
|----|----|-----------|-----------|------|--------------|-------------|
| M6 | 14 | 25345000  | 29655000  | 74   | -0.183098047 | 0.880809511 |
| M6 | 14 | 29935000  | 39315000  | 160  | 0.337930116  | 1.263941872 |
| M6 | 14 | 39495000  | 106875000 | 1177 | -0.080883164 | 0.945478683 |
| M6 | 15 | 20055000  | 34165000  | 170  | -0.466397898 | 0.723769442 |
| M6 | 15 | 34345000  | 54695000  | 348  | 0.089292619  | 1.06384843  |
| M6 | 15 | 54755000  | 72675000  | 319  | 0.565748196  | 1.480154934 |
| M6 | 15 | 73005000  | 102395000 | 503  | -0.123883042 | 0.917714278 |
| M6 | 16 | 355000    | 5245000   | 62   | 0.226204063  | 1.169753109 |
| M6 | 16 | 5255000   | 8535000   | 64   | -0.678705821 | 0.624725437 |
| M6 | 16 | 8915000   | 90105000  | 1137 | 0.018681325  | 1.013033108 |
| M6 | 17 | 135000    | 10005000  | 162  | 0.213835507  | 1.159767413 |
| M6 | 17 | 10015000  | 13445000  | 67   | -0.020356208 | 0.985989229 |
| M6 | 17 | 13625000  | 47195000  | 408  | 0.302724204  | 1.233471348 |
| M6 | 17 | 47375000  | 50395000  | 51   | 0.799969215  | 1.741063975 |
| M6 | 17 | 50565000  | 54955000  | 79   | 0.025773678  | 1.018025485 |
| M6 | 17 | 54965000  | 62665000  | 121  | 1.156870083  | 2.229731637 |
| M6 | 17 | 62845000  | 80945000  | 304  | 0.248200108  | 1.187724397 |
| M6 | 18 | 55000     | 12155000  | 222  | 0.076356391  | 1.054351849 |
| M6 | 18 | 12385000  | 21365000  | 95   | 0.281427165  | 1.215396603 |
| M6 | 18 | 21375000  | 77875000  | 993  | 0.075486869  | 1.053716576 |
| M6 | 19 | 305000    | 12955000  | 161  | 0.128604118  | 1.093235428 |
| M6 | 19 | 12965000  | 21185000  | 132  | 0.015908178  | 1.011087727 |
| M6 | 19 | 21415000  | 32345000  | 118  | -0.346070131 | 0.786724201 |
| M6 | 19 | 32415000  | 46795000  | 228  | 0.001228363  | 1.000851799 |
| M6 | 19 | 46965000  | 59065000  | 163  | 0.553640589  | 1.467784929 |
| M6 | 20 | 295000    | 24895000  | 458  | 0.344050552  | 1.269315362 |
| M6 | 20 | 24905000  | 42245000  | 241  | 0.797129772  | 1.737640666 |
| M6 | 20 | 42455000  | 54155000  | 217  | 1.717495804  | 3.28865075  |
| M6 | 20 | 54335000  | 62795000  | 127  | -0.523871339 | 0.695503009 |
| M6 | 21 | 14625000  | 35865000  | 353  | 0.1714373    | 1.126179894 |
| M6 | 21 | 36005000  | 48035000  | 220  | 0.140439156  | 1.102240586 |
| M6 | 22 | 17315000  | 32375000  | 231  | 0.187666644  | 1.138920183 |
| M6 | 22 | 32555000  | 51175000  | 309  | -0.046738705 | 0.968122354 |
| M6 | X  | 2855000   | 152665000 | 2529 | 0.387380768  | 1.308016526 |
| M7 | 1  | 1305000   | 120345000 | 1989 | 0.011846285  | 1.008245024 |
| M7 | 1  | 121245000 | 212555000 | 1083 | 0.296009834  | 1.227744053 |
| M7 | 1  | 212565000 | 232495000 | 354  | 0.011810449  | 1.00821998  |
| M7 | 1  | 232585000 | 248155000 | 286  | 0.217529805  | 1.162741026 |
| M7 | 2  | 5000      | 243015000 | 4098 | 0.0124613    | 1.008674926 |
| M7 | 3  | 245000    | 20125000  | 358  | 0.03679958   | 1.025835626 |
| M7 | 3  | 20135000  | 94035000  | 1257 | -0.250774828 | 0.840444916 |
| M7 | 3  | 94055000  | 197795000 | 1808 | 0.032958578  | 1.023108094 |
| M7 | 4  | 165000    | 70745000  | 1128 | -0.297353043 | 0.813744029 |
| M7 | 4  | 70905000  | 74755000  | 69   | 0.253204458  | 1.191851471 |
| M7 | 4  | 74985000  | 80845000  | 103  | -0.264684594 | 0.832380692 |
| M7 | 4  | 81125000  | 90545000  | 168  | 0.162505623  | 1.11922929  |
| M7 | 4  | 90555000  | 103345000 | 223  | 0.014379729  | 1.010017108 |
| M7 | 4  | 103355000 | 140445000 | 614  | -0.287345726 | 0.819408222 |

|     |    |           |           |      |              |             |
|-----|----|-----------|-----------|------|--------------|-------------|
| M7  | 4  | 140495000 | 190775000 | 871  | -0.013607345 | 0.990612448 |
| M7  | 5  | 205000    | 49725000  | 791  | -0.016253609 | 0.988797082 |
| M7  | 5  | 49755000  | 101475000 | 871  | -0.248868364 | 0.841556265 |
| M7  | 5  | 101655000 | 180635000 | 1393 | 0.02186051   | 1.015267933 |
| M7  | 6  | 465000    | 170755000 | 2833 | -0.257521655 | 0.836523714 |
| M7  | 7  | 85000     | 158945000 | 2563 | -0.01307258  | 0.990979707 |
| M7  | 8  | 175000    | 37195000  | 644  | -0.3449489   | 0.787335864 |
| M7  | 8  | 37375000  | 52085000  | 188  | -0.070865528 | 0.952066645 |
| M7  | 8  | 52265000  | 103715000 | 890  | 0.568275901  | 1.482750544 |
| M7  | 8  | 103955000 | 146085000 | 709  | 0.265450933  | 1.202011695 |
| M7  | 9  | 215000    | 68325000  | 703  | -0.290527644 | 0.817602978 |
| M7  | 9  | 71105000  | 141015000 | 1228 | 0.005757675  | 1.00399889  |
| M7  | 10 | 295000    | 49755000  | 777  | 0.199232748  | 1.148087618 |
| M7  | 10 | 49935000  | 135285000 | 1448 | -0.253195489 | 0.839035938 |
| M7  | 11 | 205000    | 56435000  | 867  | -0.295939998 | 0.814541439 |
| M7  | 11 | 56445000  | 134845000 | 1356 | 0.000148072  | 1.000102641 |
| M7  | 12 | 305000    | 38475000  | 569  | -0.233678991 | 0.850463372 |
| M7  | 12 | 38505000  | 100265000 | 1055 | 0.033496101  | 1.023489357 |
| M7  | 12 | 100445000 | 133835000 | 609  | -0.361661404 | 0.778267812 |
| M7  | 13 | 19365000  | 115015000 | 1623 | 0.008754538  | 1.006086632 |
| M7  | 14 | 20495000  | 107245000 | 1505 | 0.010299504  | 1.007164616 |
| M7  | 15 | 22805000  | 69065000  | 773  | -0.274420318 | 0.826782457 |
| M7  | 15 | 69105000  | 72555000  | 63   | 0.435521026  | 1.352399161 |
| M7  | 15 | 72565000  | 102395000 | 509  | -0.248169181 | 0.841964213 |
| M7  | 16 | 145000    | 90145000  | 1269 | -0.077807106 | 0.947496746 |
| M7  | 17 | 55000     | 19595000  | 325  | -0.337189464 | 0.791581903 |
| M7  | 17 | 19775000  | 65555000  | 623  | 0.003530958  | 1.002450471 |
| M7  | 17 | 65735000  | 81015000  | 253  | 0.271856755  | 1.207360707 |
| M7  | 18 | 155000    | 77835000  | 1312 | -0.034625994 | 0.976284821 |
| M7  | 19 | 315000    | 31185000  | 392  | -0.350935624 | 0.78407544  |
| M7  | 19 | 31195000  | 59095000  | 418  | -0.076271307 | 0.948505926 |
| M7  | 20 | 325000    | 2245000   | 36   | -0.017657201 | 0.987835553 |
| M7  | 20 | 2245001   | 2504999   | 5    | 0.665914208  | 1.586573335 |
| M7  | 20 | 2505000   | 10195000  | 140  | 0.691084735  | 1.614496971 |
| M7  | 20 | 10375000  | 12645000  | 43   | -0.263817952 | 0.832880862 |
| M7  | 20 | 12675000  | 23815000  | 210  | 0.328025031  | 1.255293771 |
| M7  | 20 | 23995000  | 48145000  | 365  | -0.00565942  | 0.996084873 |
| M7  | 20 | 48255000  | 53765000  | 104  | 0.739697053  | 1.669825161 |
| M7  | 20 | 54045000  | 62795000  | 133  | -0.132971392 | 0.911951249 |
| M7  | 21 | 14435000  | 33695000  | 313  | 0.016174196  | 1.011274178 |
| M7  | 21 | 33775000  | 47965000  | 260  | 0.285877844  | 1.219151862 |
| M7  | 22 | 16905000  | 50965000  | 542  | -0.039495548 | 0.972995105 |
| M7  | X  | 2745000   | 152495000 | 2529 | -0.32014386  | 0.800990002 |
| LCM | 1  | 1305000   | 121245000 | 1992 | 0.017142863  | 1.011953405 |
| LCM | 1  | 145165000 | 248875000 | 1724 | 0.806446688  | 1.748898651 |
| LCM | 2  | 145000    | 242995000 | 4095 | 0.001160916  | 1.000805009 |
| LCM | 3  | 205000    | 167405000 | 2900 | -0.004943168 | 0.99657952  |
| LCM | 3  | 167415000 | 197795000 | 524  | 0.605253651  | 1.521246191 |

|     |    |          |           |      |              |             |
|-----|----|----------|-----------|------|--------------|-------------|
| LCM | 4  | 265000   | 190705000 | 3181 | -0.003585205 | 0.99751801  |
| LCM | 5  | 125000   | 180655000 | 3060 | -0.002787145 | 0.998069963 |
| LCM | 6  | 205000   | 170735000 | 2835 | 0.006192763  | 1.004301722 |
| LCM | 7  | 55000    | 159095000 | 2567 | 0.315943875  | 1.244825807 |
| LCM | 8  | 265000   | 24105000  | 400  | -0.443604423 | 0.735295253 |
| LCM | 8  | 24275000 | 146205000 | 2037 | 0.313820044  | 1.242994613 |
| LCM | 9  | 275000   | 140995000 | 1933 | 0.002456305  | 1.001704031 |
| LCM | 10 | 265000   | 135365000 | 2231 | -0.005598514 | 0.996126926 |
| LCM | 11 | 285000   | 134785000 | 2220 | -0.001794186 | 0.998757138 |
| LCM | 12 | 205000   | 133485000 | 2236 | 0.00648932   | 1.004508185 |
| LCM | 13 | 19255000 | 115035000 | 1626 | -0.002057443 | 0.998574906 |
| LCM | 14 | 20505000 | 107245000 | 1505 | 0.001205675  | 1.000836059 |
| LCM | 15 | 22865000 | 102315000 | 1343 | 0.01449977   | 1.01010115  |
| LCM | 16 | 185000   | 31935000  | 488  | 0.308423781  | 1.238353995 |
| LCM | 16 | 34305000 | 90045000  | 775  | -0.419702706 | 0.747578661 |
| LCM | 17 | 35000    | 19665000  | 326  | -0.326851696 | 0.797274429 |
| LCM | 17 | 19675000 | 21065000  | 22   | 0.337259955  | 1.263354882 |
| LCM | 17 | 21835000 | 80935000  | 855  | 0.036910762  | 1.025914686 |
| LCM | 18 | 55000    | 77895000  | 1314 | -0.016416647 | 0.988685345 |
| LCM | 19 | 365000   | 59085000  | 809  | 0.049567445  | 1.034954573 |
| LCM | 20 | 305000   | 62755000  | 1048 | -0.009984187 | 0.993103381 |
| LCM | 21 | 14425000 | 47935000  | 575  | 0.011503186  | 1.008005273 |
| LCM | 22 | 16905000 | 51145000  | 544  | 0.012335617  | 1.008587057 |
| LCM | X  | 2815000  | 152645000 | 2530 | -0.039118107 | 0.973249695 |

---
